# Supplementary material for: Accurately calibrated X-ray fluorescence core scanning (XRF-CS) record of Ti ∕ Al reveals Early Pleistocene aridity and humidity variability over North Africa and its close relationship to low-latitude insolation
Source: Copernicus journal article supplement (doi:10.5194/cp-18-2509-2022), 2022-11-22
Supplement: Supplementary file 1 [file cp-18-2509-2022-supplement.zip]

Archive with 3 entries (3 files):
- Supplementary Material_Hennekam et al. _CP_v4.xlsx
- cp-18-2509-2022-supplement-title-page.pdf
- Supplementary Material_Hennekam et al._Calibration_CP_v4.docx
