# Supplementary material for: Accurately calibrated X-ray fluorescence core scanning (XRF-CS) record of Ti ∕ Al reveals Early Pleistocene aridity and humidity variability over North Africa and its close relationship to low-latitude insolation
Source: Copernicus journal article supplement (doi:10.5194/cp-18-2509-2022), 2022-11-22
Supplement: Supplementary file 1 [file cp-18-2509-2022-supplement.zip › cp-18-2509-2022-supplement-title-page.pdf]

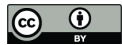

*Supplement of*

**Accurately calibrated X-ray fluorescence core scanning (XRF-CS) record of Ti / Al reveals Early Pleistocene aridity and humidity variability over North Africa and its close relationship to low-latitude insolation**

**Rick Hennekam et al.**

*Correspondence to:* Rick Hennekam ([rick.hennekam@nioz.nl](mailto:rick.hennekam@nioz.nl))

- [cp-18-2509-2022-supplement-title-page.pdf](#)
- [Supplementary Material\\_Hennekam et al. \\_CP\\_v4.xlsx](#)
- [Supplementary Material\\_Hennekam et al.\\_Calibration\\_CP\\_v4.docx](#)

The copyright of individual parts of the supplement might differ from the article licence.
