# Supplementary material for: Accurately calibrated X-ray fluorescence core scanning (XRF-CS) record of Ti ∕ Al reveals Early Pleistocene aridity and humidity variability over North Africa and its close relationship to low-latitude insolation
Source: Copernicus journal article supplement (doi:10.5194/cp-18-2509-2022), 2022-11-22
Supplement: Supplementary file 1 [file cp-18-2509-2022-supplement.zip › Supplementary Material_Hennekam et al. _CP_v4.xlsx]

## Sheet: ReadMe
Data Supplement to: "Accurately calibrated XRF-CS record of Ti/Al reveals Early Pleistocene aridity/humidity variability over North Africa and its close relationship to low-latitude insolation"
Hennekam et al.
Note: The sheets within this Excel file contain the ODP Site 967 data produced with different calibration appoaches (see Methods section 2.2). Within these sheets, we present data for calibration samples, derived by WD-XRF on glass beads (Konijnendijk et al., 2014), and calibrated XRF-CS data from AvaaXelerate (Bloemsma, 2015; Weltje et al., 2015). The sheets are labelled with the sample amount u…
References:
Bloemsma, M. R., 2015. Development of a Modelling Framework for Core Data Integration using XRF Scanning. Delft University of Technology, p. 229.
Grant, K. M., Rohling, E. J., Westerhold, T., Zabel, M., Heslop, D., Konijnendijk, T., Lourens, L., 2017. A 3 million year index for North African humidity/aridity and the implication of potential pan-African Humid periods. Quaternary Science Reviews 171, 100-118.
Konijnendijk, T. Y. M., Ziegler, M., Lourens, L. J., 2014. Chronological constraints on Pleistocene sapropel depositions from high-resolution geochemical records of ODP Sites 967 and 968. Newsletters on Stratigraphy 47, 263-282.
Weltje, G. J., Bloemsma, M. R., Tjallingii, R., Heslop, D., Röhl, U., Croudace, I. W., 2015. Prediction of Geochemical Composition from XRF Core Scanner Data: A New Multivariate Approach Including Automatic Selection of Calibration Samples and Quantification of Uncertainties, Micro-XRF Studies of Sediment Cores, pp. 507-534.

## Sheet: Data used
				Calibrated XRF-CS values for ODP 967 using 1060 calibration samples								Ratios
Age [kyr BP]	Depth [m]	Al [ppm]	Si [ppm]	K [ppm]	Ca [ppm]	Ti [ppm]	Mn [ppm]	Fe [ppm]	Sr [ppm]	Zr [ppm]	Ba [ppm]	Ti/Al	Ba/Al
0.171	0.03	75120.1	163189	9565	75310.9	6273.83	1012.9	54967	561.119	217.018	270.764	0.0835173	0.00360441
0.228	0.04	80761.9	176992	10904.5	71583	7037.56	1195.73	61991.9	446.634	213.518	193.323	0.0871396	0.00239374
0.285	0.05	81755.9	176383	10436.2	67805.2	7126.23	3043.1	63395.2	407.835	203.394	186.185	0.0871647	0.00227733
0.342	0.06	87992.2	188209	12942.4	55611.9	7784.93	1254.15	71312.5	382.178	217.734	237.296	0.088473	0.00269679
0.3995	0.07	88237.4	189095	13265.7	53937.4	7761.11	1216.98	71748.2	388.899	221.134	205.025	0.0879572	0.00232357
0.457	0.08	83710.2	181675	11780.2	64633.9	7288.36	1144.68	66403.1	408.617	213.764	236.387	0.0870665	0.00282388
0.514	0.09	86632.2	185410	12320.9	60231.7	7637.85	1114.18	71534.5	382.718	213.698	220.48	0.0881641	0.00254502
0.571	0.1	74238.9	172456	10040.3	94016	6233.22	848.227	56005.8	398.971	203.837	166.676	0.0839617	0.00224513
0.628	0.11	74006.7	167711	9400.77	94692.5	6288.94	918.297	56111.8	456.804	201.89	173.135	0.084978	0.00233945
0.685	0.12	75710.5	168223	10099.6	86291.1	6223.36	1040.53	61850.3	546.437	195.561	198.856	0.0821994	0.00262653
0.742	0.13	73067.2	163717	9182.88	92370.8	6084.58	1598.39	56427.2	562.792	194.038	169.598	0.0832738	0.00232112
0.799053	0.14	76572.8	162422	9620.66	75157.3	6310.24	2139.45	61749.6	723.638	195.274	227.69	0.0824084	0.00297351
0.856105	0.15	78998.3	162570	9940.88	66225.6	6568.81	2794.14	65098.9	848.794	196.298	229.526	0.0831513	0.00290545
0.913158	0.16	77656	158227	9494.04	68855.4	6366.22	3411.5	65150.2	989.735	187.865	260.36	0.0819797	0.00335273
0.970211	0.17	81156	167689	10716.7	59922.6	6811.29	2862.95	66186.1	753.579	202.79	230.546	0.0839284	0.00284077
1.02726	0.18	80997.7	169954	10715.1	62442.6	6790.9	2693.07	65344.5	630.633	202.478	235.075	0.0838407	0.00290225
1.08432	0.19	81990.5	172848	10912.4	62115.5	6940	2608.92	66349.5	568.327	204.299	203.683	0.084644	0.00248422
1.14137	0.2	85721	175724	11865.2	50572.8	7123.82	5010.6	74211.8	555.218	195.743	255.728	0.0831047	0.00298327
1.19842	0.21	84904.1	171859	11229.8	52648.6	7090.22	5321.18	74932.1	625.578	192.608	217.014	0.0835086	0.00255599
1.25547	0.22	81757.4	164663	10312.9	58187.6	6751.58	6111.97	71899.9	805.267	185.481	225.228	0.0825807	0.00275483
1.31253	0.23	78550.6	157924	9292	67329.4	6524.74	6491.93	68103.5	1056.29	179.749	188.386	0.0830641	0.00239828
1.36958	0.24	79091.2	162074	9964.95	68474	6546.75	4104.06	67909.3	976.631	182.556	249.719	0.0827747	0.00315735
1.42663	0.25	82411.7	169079	10604.8	62848.1	7009.48	4218.51	70830.4	771.231	188.792	203.675	0.0850543	0.00247144
1.48368	0.26	79136.2	159375	9275.61	69256.6	6640.14	6497.38	68975.5	973.958	176.289	214.303	0.0839077	0.00270803
1.54074	0.27	82655.1	169943	10658.9	61806.9	7105.16	4184.41	69447.9	758.686	193.039	191.982	0.0859615	0.00232268
1.59779	0.28	82744.9	173648	11504.1	66920.9	7064.64	1434.58	72472.3	718.319	194.978	238.853	0.0853784	0.00288662
1.65484	0.29	76591.4	158789	9453.86	82265.1	6370.87	1787.24	68272.6	1017.99	179.34	238.026	0.08318	0.00310774
1.71189	0.3	77497.4	161666	9924.75	80868.1	6380.31	1518.17	71331.4	953.067	180.242	201.851	0.0823294	0.00260462
1.76895	0.31	77052.7	175126	10984	83895.4	6479.7	683.219	60764.2	452.435	204.7	237.891	0.0840944	0.00308738
1.826	0.32	79660.4	179548	11679.1	74958.4	6723.24	683.126	63711	398.355	210.406	243.265	0.0843989	0.00305378
1.88307	0.33	81658.1	185486	12266.6	71363.2	7126.86	664.254	63505.9	356.185	219.28	197.028	0.0872769	0.00241284
1.94014	0.34	81462.4	183699	11868.6	73134.5	7084.93	693.423	63506.2	352.431	215.294	229.444	0.0869717	0.00281656
1.99721	0.35	82387.5	185811	12099	71850	7207.1	707.486	64785.3	336.654	215.651	212.625	0.0874781	0.00258079
2.05429	0.36	82333.4	185207	12128.3	70555.7	7140.62	713.696	65120.3	333.444	215.232	234.097	0.0867281	0.00284328
2.11136	0.37	83031.9	185690	12134.3	69070.9	7227.68	807.079	66827.8	319.03	212.492	242.268	0.0870471	0.00291777
2.16843	0.38	84640.6	188686	12327.3	68202.4	7469.19	792.555	68244.3	302.375	214.319	208.862	0.088246	0.00246764
2.2255	0.39	84259.7	187188	11915.8	69921.7	7504.97	796.893	67361.3	302.58	214.579	201.819	0.0890695	0.00239521
2.28257	0.4	83995.9	190287	12528.6	69752.1	7383.28	810.893	67528.9	281.817	212.392	214.023	0.0879005	0.00254802
2.33964	0.41	83551.6	187086	11820.4	73256.1	7441.16	797.931	66017.9	302.679	210.818	235.505	0.0890607	0.00281868
2.39671	0.42	83360.1	189591	12212.9	72845.7	7460.3	802.813	64726.3	299.505	214.669	197.512	0.0894949	0.00236939
2.45379	0.43	82125.3	184574	11017.4	77903.5	7581.84	710.13	61553.6	303.608	218.992	181.718	0.0923203	0.00221269
2.51086	0.44	74186.2	165987	8892.45	100271	6675.27	859.173	55281.6	501.587	199.791	187.193	0.08998	0.00252329
2.56793	0.45	77304.3	170817	9907.44	87110.4	6776.87	943.977	59825.2	506.021	200.999	226.355	0.0876648	0.0029281
2.625	0.46	80055.9	176929	11328.6	76148.9	6857.19	1110.9	64502.5	539.429	201.783	212.81	0.085655	0.00265827
2.682	0.47	80264.9	174735	11267	74269.7	6794.61	1286.13	66314.6	608.119	197.394	232.578	0.0846523	0.00289763
2.739	0.48	76099.8	162793	9707.14	85271.5	6412.72	1332.73	63732.3	859.504	189.415	196.153	0.0842672	0.00257758
2.796	0.49	75353.7	166851	9991.33	88741.1	6362.42	1214.1	59918.9	697.766	193.274	203.1	0.084434	0.00269529
2.853	0.5	70885.9	162573	9384.89	100097	5844.22	1039.49	52894.1	658.648	194.554	208.883	0.0824454	0.00294675
2.91	0.51	69460	166417	9538.96	106424	5756.78	890.146	48061	513.057	201.333	193.257	0.0828791	0.00278228
2.967	0.52	71266.1	173132	10430.3	98767.3	5805.8	862.368	50313.1	402.406	204.917	194.889	0.0814665	0.00273466
3.024	0.53	76948	178690	11476.4	81011.8	6431.39	823.921	58287.9	421.143	211.01	194.488	0.083581	0.00252753
3.081	0.54	76884.3	171847	11159.2	78551	6244.81	1064.03	62083.8	590.227	197.945	275.53	0.0812234	0.0035837
3.13827	0.55	79474.8	173996	11484.5	72561.5	6540.28	1077.21	66375.1	582.726	199.696	253.269	0.0822938	0.00318678
3.19554	0.56	85621.9	183272	13455.8	57889.1	7112.41	1280.85	75712.1	580.243	203.124	224.1	0.0830676	0.00261732
3.25281	0.57	87595.4	189814	14268.8	53594.2	7433.1	1108.28	74349.3	455.865	214.999	217.878	0.0848572	0.00248732
3.31008	0.58	87681.1	189266	14196.5	53175	7420.61	1108.92	74532.3	464.136	216.179	203.536	0.0846318	0.00232132
3.337	0.584706	92418	201010	15977.4	46803.3	7946.18	902.064	79886.7	304.719	221.284	236.961	0.0859809	0.00256402
3.397	0.595294	92107.5	200582	15946.2	47244.2	7870.27	930.204	79838.4	305.518	218.926	258.098	0.0854466	0.00280214
3.457	0.605882	92910.8	202248	16158.3	46758.3	7999.69	892.768	80595.4	299.829	220.555	235.575	0.0861008	0.00253549
3.518	0.616471	93521.5	204174	16574.3	45506	7998.2	850.595	81893.2	270.533	220.103	264.531	0.0855226	0.00282856
3.578	0.627059	90589.2	199351	15385.6	51239.3	7802.25	820.632	76318.9	307.871	219.958	260.262	0.0861278	0.00287299
3.63842	0.637647	89120	195860	14636.9	55401.5	7687.28	889.246	75181.2	350.317	215.13	237.021	0.0862577	0.00265957
3.699	0.648235	88847.6	195273	14471	55397.6	7696.53	881.029	74295.7	341.713	216.432	247.679	0.0866261	0.00278768
3.759	0.658824	89776.7	195595	14500.4	53544.3	7785.08	867.751	75891.9	325.355	217.423	251.773	0.086716	0.00280443
3.81947	0.669412	85975	188504	12586.6	63187.5	7715.74	979.953	68386.9	378.856	219.349	169.864	0.0897441	0.00197574
3.87995	0.68	81608.7	179327	11309.6	71223.8	7259.74	1007.8	61245.5	456.969	213.653	285.788	0.0889579	0.00350193
3.937	0.69	87541.3	192466	13826.1	56734.4	7647.75	1066.38	70100.6	368.728	218.822	239.43	0.0873616	0.00273505
3.994	0.7	81028.4	178698	11282.8	71777	6990.72	1061.34	63675.1	417.587	208.835	252.802	0.0862749	0.00311992
4.051	0.71	61645.1	144235	7047.01	135528	5063.21	1431.57	42528.5	832.963	176.566	225.592	0.0821348	0.00365954
4.109	0.72	51355.4	128071	5796.24	186014	3930.02	1827.79	32965.1	1129.92	153.64	219.892	0.0765258	0.00428177
4.151	0.7275	64054.6	149092	7683.9	126193	5168.63	1494	46665.8	815.68	177.29	187.717	0.080691	0.00293057
4.194	0.735	68909	156881	8563.26	108934	5610.46	1281.28	53385	682.782	183.354	195.659	0.0814185	0.00283938
4.237	0.7425	60935.6	141799	6887.38	141612	4850.96	1435.5	44613.4	864.206	167.875	217.909	0.0796079	0.00357606
4.28	0.75	61570.5	143140	7053.82	136260	4902.43	1507.22	45091	861.664	171.025	197.491	0.079623	0.00320756
4.337	0.76	64490.2	148552	7599.02	123172	5223.02	1312.36	47766	775.217	179.765	187.807	0.0809893	0.00291218
4.394	0.77	51894.4	127399	5688.14	183278	3992.73	1775.08	35084.2	1151.31	154.819	146.083	0.0769395	0.00281502
4.451	0.78	61721	144738	7486.55	132360	4850.5	1459.4	45395.5	958.185	172.987	183.105	0.0785874	0.00296666
4.508	0.79	69158.2	158173	9045.85	103921	5580.24	1321.79	52790.2	769.025	185.823	216.98	0.080688	0.00313744
4.565	0.8	72426.2	165251	9785.06	96791.3	5968.13	1157.92	56288.7	664.337	191.629	186.089	0.0824029	0.00256936
4.622	0.81	78755.6	175731	11057.8	79449.6	6662.73	1176.63	63195.1	521.6	200.227	191.156	0.0846002	0.00242721
4.679	0.82	74850	168455	10137.7	87905.3	6223.84	1380.84	58103.6	612.129	194.888	207.131	0.0831508	0.00276729
4.736	0.83	76822.7	172247	10550.4	82857.4	6487.66	1253.28	60340.9	548.582	200.174	183.392	0.0844497	0.00238721
4.793	0.84	70256.9	157355	8499.38	101252	5803.99	1583.96	53283.1	672.476	188.575	191.903	0.0826109	0.00273145
4.85	0.85	65090	149375	7866.67	120133	5177.76	1521.82	49101.5	849.126	176.45	201.779	0.0795476	0.0031
4.907	0.86	68722.1	156440	8702.72	108090	5532.59	1251.98	53629.4	749.85	183.355	188.284	0.0805066	0.00273978
4.964	0.87	70261.4	159254	8960.33	103219	5777.86	1306.08	54230.8	741.769	187.843	171.632	0.0822338	0.00244277
5.022	0.88	77190.7	172990	11095.3	78578.8	6319.52	1422.02	61917.9	570.025	195.87	244.627	0.081869	0.00316913
5.079	0.89	79315.3	176891	11036	73564.6	6757.16	1678.63	61082	471.261	206.935	173.852	0.0851936	0.00219191
5.13605	0.9	85603.8	186237	13075.2	55145.4	7172.24	2681.84	69272.8	423.375	207.105	232.368	0.0837841	0.00271446
5.19311	0.91	86763.5	188774	13425.1	52122.3	7250.51	3271.5	70575.9	373.315	205.954	251.847	0.0835665	0.00290268
5.24559	0.919167	86299.8	186697	13047.4	52953.4	7198.32	3526.66	70658.2	384.474	203.565	252.76	0.0834106	0.00292886
5.29751	0.928333	88115	190510	13812.3	50183.7	7364.14	3077.19	74264.8	361.916	205.597	225.236	0.0835742	0.00255617
5.35	0.9375	86980.1	192629	14418.5	55706.1	7198.43	1296.34	76606	355.694	207.49	191.558	0.0827594	0.00220231
5.40228	0.946667	86590.4	193174	14910.4	56235.4	7125.29	1061.59	75520.4	383.12	207.044	252.858	0.0822873	0.00292017
5.454	0.955833	83787.1	187985	13659.3	61884.7	6995.57	1069.44	68893.7	419.797	209.84	250.326	0.0834922	0.00298765
5.507	0.965	82051.7	184116	12995	67026.8	6773.35	1273.28	68101.1	488.004	203.13	210.077	0.0825497	0.0025603
5.559	0.974167	80894.9	182326	12550.6	69773.4	6753.49	1291.86	65371.6	512.562	205.387	183.816	0.0834847	0.00227228
5.611	0.983333	78332.8	179206	12021.3	75134.8	6566.84	1354.08	60348.5	561.677	205.717	185.406	0.0838326	0.0023669
5.663	0.9925	74667.6	171315	10502.6	89528	6355.23	1333.39	55905.4	632.591	197.953	192.446	0.0851136	0.00257737
5.716	1.00167	74462.7	168237	9622.63	92398.9	6496.49	1348.69	54799.3	592.97	200.287	170.03	0.087245	0.00228343
5.76786	1.01083	72929	162494	8730.39	99191.9	6456.08	1439.98	53747.8	653.2	195.719	159.599	0.0885256	0.00218842
5.82028	1.02	71351.8	160306	8614.08	104160	6190.99	1461.44	53200.5	682.789	189.294	182.319	0.0867672	0.00255521
5.871	1.02889	69781.8	156299	8059.7	108750	6060.03	1471.35	51129.4	704.677	189.259	171.845	0.0868426	0.00246261
5.922	1.03778	59087.9	138537	6511.48	146839	4789.56	1612.12	40296.8	973.204	171.02	196.303	0.0810582	0.00332222
5.973	1.04667	49216.5	122974	5335.51	196393	3727.62	1865.69	31752.7	1181.05	151.168	163.149	0.0757392	0.00331492
6.023	1.05556	51112.9	126073	5615.98	184835	3823.87	1620.55	34562.6	1084.13	154.759	155.47	0.0748122	0.0030417
6.074	1.06444	51232.8	126871	5851.87	185180	3691.01	1991.94	37213.9	1094.8	145.909	163.182	0.0720439	0.00318511
6.166	1.07333	51456.6	126028	5834.5	178328	3646.27	2197.61	37267.9	1094.84	145.078	240.008	0.0708612	0.00466427
6.302	1.08222	52358.6	128412	6123.09	173639	3686.2	1958.52	38001.1	1043.64	145.883	313.874	0.0704029	0.0059947
6.438	1.09111	51901.1	129962	6361.44	173845	3636.23	2219.07	36361.6	1033.21	145.286	379.272	0.0700608	0.00730758
6.574	1.1	51623.6	129854	6506.07	173170	3552.88	1839.63	35790.9	1029.72	144.999	561.042	0.0688227	0.0108679
6.757	1.112	52866.2	132271	6670.98	163880	3672.27	2723.67	36381.1	980.082	144.187	673.116	0.0694634	0.0127324
6.94	1.124	53443	131534	6930.89	163785	3519.39	1398.14	42447.8	944.306	139.736	724.85	0.0658532	0.0135631
7.124	1.136	53644.6	131085	6829.61	164117	3529.2	1478.85	42965.5	928.666	137.85	795.108	0.0657885	0.0148218
7.307	1.148	64268.2	154473	8723.09	126273	4960.83	1228.49	48976.6	703.487	168.438	353.153	0.0771894	0.00549499
7.4903	1.16	65855.5	156632	8605.04	121163	5407.08	1113.74	47998.3	679.211	180.714	249.521	0.0821052	0.00378892
7.61402	1.16812	61882.3	144124	7303.69	136711	4929.74	1216.39	45763.7	822.719	165.696	407.287	0.0796633	0.00658164
7.73928	1.17625	53467.7	129016	6626.74	163421	3501.73	1426.15	44027.8	925.571	136.086	876.812	0.0654924	0.0163989
7.863	1.18437	53587.2	128829	6679.73	165013	3395.79	1542	46538.4	916.174	130.923	849.249	0.0633694	0.015848
7.987	1.1925	57025.3	135892	7180.03	151733	3852.52	1456.63	47613.7	870.96	141.163	707.719	0.0675581	0.0124106
8.111	1.20062	59624.1	143189	8072.23	133918	4003.5	1356.01	50079.7	739.785	151.753	544.305	0.0671456	0.00912893
8.235	1.20875	57734.4	136813	7520.93	141683	3722.95	1482.92	52267.5	805.294	140.329	628.321	0.064484	0.010883
8.359	1.21688	56474.1	134714	7377.41	146198	3573.75	1369.73	51532.8	795.328	137.873	697.582	0.0632811	0.0123522
8.48282	1.225	52091.9	124431	6462.8	170095	3112.37	1528.98	49853	939.543	122.561	838.07	0.0597476	0.0160883
8.60665	1.23312	55897.2	130833	7041.31	147531	3408.13	1572.23	53708	829.156	130.85	851.24	0.0609714	0.0152287
8.732	1.24125	57377.7	132936	7312.98	136209	3484.16	1235.01	54983.5	772.621	138.651	824.905	0.0607233	0.0143768
8.856	1.24937	58985.8	139156	7741.6	139607	3900.67	1338.66	52582	845.122	143.09	626.308	0.066129	0.0106179
8.97962	1.2575	56083.2	126784	6804.16	138946	3197.95	1403.98	62914.7	761.639	126.985	653.188	0.0570216	0.0116468
9.10324	1.26562	55482.9	125441	6649.23	144464	3209.41	1365.5	60872.1	852.832	126.126	671.058	0.057845	0.0120949
9.22838	1.27375	55489	127236	6682.36	147898	3354.41	1367.07	57040.3	898.091	131.242	501.707	0.0604517	0.00904155
9.352	1.28188	54154.5	127079	6569.22	157168	3411.17	1156.9	49787.3	947.889	135.61	604.718	0.0629897	0.0111665
9.476	1.29	56712	136576	7429.68	148984	3814.69	1149.59	47685.9	901.773	146.731	507.013	0.0672642	0.00894014
9.632	1.30017	61174.5	148428	8374.03	127566	4379.2	1933.56	47211.1	784.899	162.547	310.806	0.0715853	0.00508064
9.787	1.31033	62619.8	154984	8935.05	125195	4713.91	1909.27	44570.2	770.818	172.297	253.046	0.0752783	0.00404099
9.942	1.3205	62917.5	152962	8657.5	125700	4740.81	1545.01	46008.4	784.552	172.76	246.515	0.0753497	0.00391807
10.0978	1.33067	62123.6	153261	8910.3	119569	4711.97	1403.66	42053.2	836.328	184.73	250.528	0.0758484	0.00403273
10.2522	1.34083	62951.5	154113	8932.15	116222	4768.11	1760.1	43702.9	825.206	183.888	197.592	0.0757425	0.0031388
10.408	1.351	63643	158571	9262.41	119438	4948.46	1761.87	43178.8	772.216	184.886	171.497	0.0777534	0.00269467
10.601	1.36117	64479.9	160589	9628.93	121706	4942.73	1294.42	46616.7	701.148	178.24	226.879	0.0766553	0.00351859
10.848	1.37133	62464.2	156673	9234.47	129986	4676.23	1398.26	45773.2	735.181	170.824	239.065	0.0748627	0.00382723
11.096	1.3815	62025.2	157468	9193.32	132745	4696.07	1344.83	44467.3	697.982	173.927	192.426	0.0757122	0.00310238
11.343	1.39167	60958.6	155666	9175.55	134896	4486.5	1440.59	44117.4	706.922	168.502	250.892	0.0735991	0.00411577
11.59	1.40183	59970	152230	8436.71	139988	4566.46	1918.06	40803.8	763.903	169.101	230.918	0.0761458	0.00385056
11.837	1.412	61164	155012	8632.93	135611	4736.04	1701.48	41488.1	726.993	176.398	166.693	0.0774319	0.00272534
12.085	1.42217	58692.2	147727	8008	148085	4417.63	1526.51	40946	850.853	166.164	211.355	0.0752677	0.00360107
12.332	1.43233	57860.1	147631	8036.43	150817	4386.99	1505.83	39145.7	875.873	167.684	204.936	0.0758206	0.00354192
12.579	1.4425	58602.3	148374	8095.09	149745	4422.68	1505.14	40665.1	868.413	166.299	196.556	0.0754694	0.00335407
12.826	1.45267	59110.4	149246	8073.58	145853	4516.37	1520.78	40412	821.575	170.786	179.666	0.0764056	0.00303949
13.073	1.46283	57493.6	147138	8021.32	152364	4287.52	1579.16	39534.9	845.218	164.386	218.783	0.0745739	0.00380534
13.32	1.473	56304.7	145060	7874.93	157457	4122.04	1620.33	38721.7	866.77	160.967	230.678	0.0732095	0.00409695
13.568	1.48317	55464.5	144304	7743.65	161297	4090.06	1680.47	37189.5	890.077	162.804	182.74	0.073742	0.00329471
13.815	1.49333	53932	140629	7489.99	169864	3930.51	1685.53	36835.4	1001.81	156.803	183.15	0.0728789	0.00339595
14.062	1.5035	51723.5	136350	7009.44	179814	3792.32	1730.2	33430.1	1037.63	155.357	212.88	0.073319	0.00411573
14.556	1.52383	55624.1	146802	7801.57	166243	4247.59	1666.04	35557	834.915	164.436	182.939	0.0763624	0.00328884
14.803	1.534	59853.3	159080	9316.46	146588	4536.13	1382.91	39682.1	658	171.293	214.175	0.0757875	0.00357834
15.051	1.54417	68022.1	171887	11093.9	112564	5309.21	1191.01	48126.7	601.4	183.154	283.11	0.0780512	0.00416202
15.298	1.55433	74144.9	182329	12595.8	91377.9	6035.52	1132.28	54248.9	550.952	196.962	213.074	0.0814017	0.00287375
15.545	1.5645	75272.8	181737	12670.3	86489.1	6122.76	1152.37	55500.1	573.266	197.2	271.315	0.0813409	0.00360441
15.792	1.57467	77437	186048	13455.6	78878.4	6347.64	1053.03	57267.5	533.69	204.402	259.749	0.0819717	0.00335433
16.039	1.58483	68840.6	175536	11715.2	109262	5391.81	1110.32	48491.1	587.185	186.426	269.526	0.0783231	0.00391522
16.287	1.595	67717.1	175327	11599.2	113371	5299.14	1063.23	46465.4	569.325	188.228	239.154	0.0782541	0.00353165
16.534	1.60517	68227.8	176544	11813.5	111868	5292.15	1073.76	48157.6	536.46	185.815	248.185	0.0775658	0.0036376
16.781	1.61533	69846.8	177773	11731	106902	5545.59	1028.76	49639.4	516.521	192.009	193.266	0.0793964	0.00276699
17.028	1.6255	70784.2	171912	10742.5	105203	5640.18	1370.75	53860.7	561.038	182.882	209.102	0.0796814	0.00295407
17.275	1.63567	70765.9	175153	11236.4	104983	5699.91	1148.65	51817.5	542.09	188.372	214.72	0.0805459	0.00303423
17.522	1.64583	70103.6	174668	11255.4	107291	5546.92	1217.14	51691.2	541.843	184.573	227.893	0.0791246	0.0032508
17.77	1.656	69647	173904	11069.3	111286	5550.89	1111.97	50660.2	546.895	183.367	254.806	0.0797004	0.00365854
18.017	1.66617	69219.3	175350	11184.1	113490	5588.08	1049.32	49120.5	546.82	187.523	195.5	0.0807301	0.00282436
18.264	1.67633	63026.8	166449	10316.8	135457	4779.46	1218.18	43551.3	597.465	173.444	234.13	0.0758321	0.00371477
18.511	1.6865	60768.5	160559	9213.64	148057	4668.46	1176.5	41161.5	582.282	172.977	172.558	0.0768238	0.0028396
18.758	1.69667	55666.4	148068	7930.72	171221	4126.12	1377.48	37261	696.202	159.67	201.376	0.0741222	0.00361756
19.0043	1.70683	56770.8	151945	8406.23	161689	4187.82	1337.9	37515.2	642.607	165.544	203.037	0.0737672	0.00357643
19.253	1.717	59494.6	156273	8709.89	151289	4562.18	1325.37	39571.3	633.844	171.338	183.166	0.0766823	0.0030787
19.5008	1.72717	55644	149084	8027.81	169799	4185.37	1358.93	36454.6	694.263	162.99	186.282	0.0752169	0.00334775
19.7462	1.73733	56143.4	151756	8327.99	165349	4204.01	1357.74	36292.8	657.302	167.268	164.805	0.0748799	0.00293543
19.994	1.7475	57388.2	151607	8136	163479	4355.83	1362.91	38182.6	638.836	165.004	186.057	0.0759011	0.00324207
20.241	1.75767	55733.5	151034	8234.41	167339	4147.12	1385.21	35740.3	624.903	164.774	210.088	0.0744099	0.00376952
20.489	1.76783	59135.3	160751	9402.84	151755	4488.7	1303.1	38286.8	589.878	172.916	181.268	0.0759056	0.00306532
20.736	1.778	61491.1	167286	10307.1	139064	4672.08	1262.83	39874.8	544.142	178.772	196.026	0.0759798	0.00318787
20.9891	1.78817	63494.6	172479	11066.8	128396	4852.41	1111.09	40898.9	505.48	186.209	211.566	0.0764223	0.00333203
21.2396	1.79833	68082.3	189930	13910.7	106272	5304.53	1095.35	42394.9	429.477	203.886	173.882	0.0779135	0.002554
21.4927	1.8085	82410.4	247606	31420.5	45699.6	6025.51	1166.64	48080	220.821	245.029	382.989	0.0731159	0.00464733
21.7457	1.81867	85497.8	267919	40663.4	36593	6189.66	1232.82	48056	182.697	250.905	465.373	0.0723955	0.0054431
22.2494	1.839	58156.6	158229	9154.42	147319	4432.85	1222.87	35317.9	614.633	182.312	188.985	0.0762226	0.00324959
22.5024	1.84917	57500	154990	8530.2	158248	4371.89	1451.76	36674.4	602.094	171.927	157.274	0.0760329	0.00273521
22.753	1.85933	56860	150619	8036.65	162389	4245.35	1587.84	37784.5	620.606	164.506	178.479	0.0746632	0.00313893
23.014	1.8695	54665.1	145619	7463.85	176864	4053.87	1722.53	36437.2	643.579	156.68	177.776	0.0741583	0.0032521
23.275	1.87967	58841.1	154339	8452.32	155559	4421.12	1569.35	40593.5	602.498	164.159	185.164	0.0751366	0.00314685
23.536	1.88983	61280.9	159249	9016.02	144090	4632.98	1458.11	43147.6	549.926	168.028	206.124	0.0756023	0.00336359
23.797	1.9	65489.9	165858	9724.67	126802	5090.75	1253.05	47134.4	507.767	177.11	209.49	0.0777333	0.00319881
24.105	1.912	64366.5	164789	9719.29	130189	4898.45	1281.91	46469.3	506.937	174.012	220.368	0.0761025	0.00342365
24.413	1.924	61006.4	151410	7776.83	149422	4754.68	1601.78	43609.6	606.71	163.477	224.865	0.0779375	0.00368593
24.721	1.936	64805	156936	8288.45	133881	5201.89	1535.3	47331.9	600.193	171.447	191.221	0.0802699	0.00295071
25.029	1.948	71345	165068	9361.25	104695	5794.21	1414.75	55213.8	521.493	181.63	255.704	0.081214	0.00358404
25.337	1.96	68580.5	166544	9726.89	113516	5435.5	1311.16	51437.7	512.053	181.26	208.076	0.0792572	0.00303404
25.645	1.972	67407.5	165392	9518.3	118233	5352.63	1392.86	49777.6	519.937	180.425	182.891	0.079407	0.00271322
25.953	1.984	68279	166323	9692.95	113191	5417.58	1328.87	50429.9	510.14	183.091	205.544	0.0793448	0.00301036
26.261	1.996	67696.9	167290	9956	113854	5269.42	1291.05	49438.3	487.694	182.038	247.864	0.0778385	0.00366138
26.569	2.008	72680.6	172438	10417.9	96917.7	5933.1	1244.64	54221.4	465.97	193.592	210.169	0.0816326	0.00289168
26.877	2.02	71979.1	176411	11311.9	98025.3	5706.33	1120.17	53397.8	440.8	191.651	251.924	0.0792777	0.00349996
27.042	2.02643	77624.9	184454	12443.3	84095.5	6354.64	1038.25	60335.7	415.835	197.545	233.488	0.0818633	0.0030079
27.207	2.03286	82057.2	191384	13693.9	72160.2	6797.06	1048.12	65817.4	380.082	201.795	251.223	0.0828332	0.00306156
27.3715	2.03929	84522.8	196179	14340.1	66669.7	7171	918.87	66888	343.159	210.53	234.898	0.084841	0.00277911
27.536	2.04571	84153.9	195124	14343.9	66622.9	7081.4	1022.41	67172.8	369.072	208.358	224.618	0.0841482	0.00266913
27.701	2.05214	85453.7	200213	15034.3	64432.2	7346.45	893.007	66638.3	336.92	216.088	194.052	0.08597	0.00227084
27.866	2.05857	85528	199735	15194.8	61969.5	7248.5	967.084	66946.8	332.067	215.528	226.362	0.0847501	0.00264665
28.031	2.065	85026.1	196880	14603.8	64297.9	7190.27	983.606	67501.1	343.24	210.881	244.445	0.0845655	0.00287494
28.197	2.07143	83519.5	195345	14201.5	67005.3	7029.96	1049.21	64836.6	336.654	210.638	245.269	0.0841715	0.00293666
28.362	2.07786	77129.6	185894	12490.4	84068.4	6425.66	1047.79	56306.3	412.494	206.06	201.624	0.0833099	0.0026141
28.527	2.08429	73079.4	178600	11575.7	95544.5	5883.61	1080.19	53304.4	452.708	195.692	239.405	0.0805098	0.00327595
28.691	2.09071	68949.7	173086	10789.2	108829	5453.26	1323.8	48718.8	495.016	188.598	211.105	0.0790904	0.00306172
28.856	2.09714	68189.8	169887	10494.1	111839	5265.24	1330.4	50024.6	505.268	181.182	256.638	0.0772145	0.00376359
29.021	2.10357	70831.9	177343	11629.5	101287	5508.47	1065.24	51839.7	452.253	191.662	228.386	0.0777682	0.00322433
29.186	2.11	73269.9	183824	12789.7	94225.8	5702.58	1051.53	54633.1	433.134	192.391	251.841	0.0778297	0.00343716
29.434	2.11964	74661.8	187314	13328.6	90463.3	5875.79	1069.07	55893.1	425.99	195.002	224.811	0.0786988	0.00301106
29.682	2.12929	72511.3	178900	11911.1	97968.5	5659.63	1187.34	54745.5	481.877	188.501	228.613	0.0780517	0.00315279
29.929	2.13893	70303.9	174169	11026.8	106680	5505.35	1281.14	52370	505.414	185.169	198.706	0.0783079	0.00282639
30.176	2.14857	70090.7	172061	10576.8	106896	5562.06	1246.48	51457.9	496.668	187.191	210.05	0.0793551	0.00299683
30.424	2.15821	69273	170014	10330.5	108969	5417.6	1250.86	51016.3	501.885	186.078	203.421	0.0782065	0.00293651
30.671	2.16786	67988	169199	10266.8	112741	5342.03	1296.5	48706.5	533.551	186.489	188.366	0.0785731	0.00277057
30.919	2.1775	68395.8	167567	9865.02	111210	5433.97	1319.75	49285.5	518.84	188.332	174.229	0.0794489	0.00254737
31.166	2.18714	68256	167653	10015.3	111656	5339.12	1451.16	50294.3	523.163	182.825	200.594	0.078222	0.00293884
31.414	2.19679	69775.8	170133	10399.2	104273	5456.09	1376.49	51461.9	501.796	187.984	205.073	0.0781946	0.00293902
31.661	2.20643	67721.5	166679	10017.5	113539	5232.89	1372.76	50266.7	548.383	181.296	202.404	0.0772707	0.00298877
31.909	2.21607	66902.3	166568	10157.2	114206	5138.69	1402.35	48459.3	567.493	181.391	232.119	0.0768089	0.00346953
32.156	2.22571	67445.9	166694	10177.6	109969	5179.62	1360.06	48828.9	549.981	184.78	235.891	0.0767967	0.00349748
32.404	2.23536	68468.9	167923	10395.9	105139	5298.79	1384.56	49709.7	564.612	187.535	230.555	0.0773898	0.00336729
32.651	2.245	69299.4	166998	10163.3	106464	5412.13	1421.1	52184.4	598.292	183.456	209.603	0.0780977	0.00302459
32.899	2.25464	68989.3	165299	9864.08	107287	5486.78	1466.03	50936.7	644.858	185.464	194.352	0.079531	0.00281713
33.146	2.26429	70167.9	162940	9463.92	104816	5690.82	1437.9	53514.9	684.948	184.374	199.701	0.081103	0.00284605
33.394	2.27393	71414.5	162959	9337.62	99554.9	5900.64	1354.39	54133	664.648	190.541	190.233	0.0826253	0.00266379
33.641	2.28357	70433.2	160773	9196.34	101481	5709.72	1450.65	53787.5	690.587	185.762	227.627	0.0810657	0.00323182
33.889	2.29321	70567.3	162292	9287.3	101362	5792.3	1598.71	53170.8	699.115	188.979	164.174	0.0820819	0.00232648
34.136	2.30286	71076.3	163430	9365.47	99666.1	5864.23	1586.18	53243.4	677.865	191.884	149.348	0.0825062	0.00210124
34.384	2.3125	70256.9	165950	9687.54	102651	5750.65	1894.42	50737.5	647.401	188.878	174.506	0.0818517	0.00248383
34.631	2.32214	69370.9	168074	9986.9	108862	5650.03	1531.04	49341	618.287	188.017	180.06	0.0814467	0.00259562
34.879	2.33179	67516.4	165348	9752.79	114143	5419.2	1480.97	47483.2	627.651	184.45	218.253	0.0802649	0.00323259
35.126	2.34143	67799.9	165442	9703.32	113064	5354.89	1294.69	49124.6	560.51	186.053	187.158	0.0789808	0.00276045
35.374	2.35107	69465	166944	9899.72	106469	5482.77	1249.79	52654.6	531.239	188.193	158.959	0.0789285	0.00228833
35.621	2.36071	67426.6	164282	9624.62	114063	5206.68	1241.2	50598.3	521.555	181.607	213.214	0.0772199	0.00316217
35.869	2.37036	63370.6	159375	9150.11	128408	4829.66	1271.2	44896.6	590.106	177.904	214.572	0.076213	0.003386
36.116	2.38	63881.4	157893	8734.16	128559	4970.59	1378.44	45637.8	601.976	178.58	173.621	0.0778097	0.00271786
36.33	2.38833	58657	147102	7619.39	150308	4421.16	1654.47	41350	698.107	165.418	187.493	0.0753732	0.00319644
36.544	2.39667	53162.6	133414	6117.17	178855	3967.91	2335.95	36953.6	830.145	152.279	140.662	0.0746373	0.00264589
36.758	2.405	53768.7	131315	5873.75	174888	3980.59	2624.81	38846.7	846.118	149.464	152.115	0.0740317	0.00282907
36.972	2.41333	58004.3	141239	6852.08	149266	4370.06	2096.22	41504	721.483	163.787	172.796	0.0753403	0.00297902
37.186	2.42167	61260.9	147514	7469.98	136152	4670.49	2022.32	44620.8	672.489	169.037	175.673	0.0762393	0.00286761
37.399	2.43	64450.5	155989	8458.62	121178	4931.93	1925.17	47043.9	572.323	176.744	190.739	0.0765227	0.00295947
37.613	2.43833	65996.3	159232	8754.05	116617	5139.52	2009.6	48317.5	557.341	179.489	170.368	0.0778758	0.00258148
37.827	2.44667	67189.1	164327	9433.52	113327	5294.65	1705.9	48251.7	534.753	184.165	179.855	0.0788021	0.00267684
38.041	2.455	68129.8	168839	10090.9	109466	5354.53	1505.98	48432.2	489.28	187.893	195.961	0.078593	0.00287629
38.255	2.46333	68562.7	170882	10555.2	108917	5349.21	1403.69	49211.9	510.588	186.658	207.773	0.0780193	0.00303041
38.469	2.47167	70139.2	177516	11680.3	103098	5424.82	1328.21	50534.1	475.791	189.534	208.358	0.0773436	0.00297063
38.683	2.48	73286.1	184667	12773.8	93003.8	5747.41	1179.56	53378.5	422.44	195.894	218.173	0.0784243	0.002977
38.913	2.48897	73548.9	186004	12898	92068.1	5840.79	1221.54	52686.6	425.642	199.203	189.314	0.0794138	0.00257399
39.143	2.49793	70475.5	176648	11444.7	101687	5513.52	1244.26	50244.4	472.665	192.847	211.801	0.0782332	0.00300531
39.373	2.5069	70383	176239	11222	103572	5569.79	1308.66	50112.3	472.511	192.294	189.699	0.0791355	0.00269524
39.603	2.51586	69104.6	169483	10222	106610	5431.32	1343.43	49901.9	491.015	189.121	205.954	0.0785957	0.00298033
39.833	2.52483	68277.9	166476	9701.28	112577	5441.74	1451.25	49732.1	538.501	185.092	174.981	0.0796999	0.00256277
40.063	2.53379	66861	161773	9157.06	117972	5269.23	1521.93	49398.6	584.677	179.5	185.906	0.0788087	0.00278049
40.293	2.54276	69298.6	163489	9165.8	109005	5589.49	1627.62	51472.6	557.314	184.581	179.666	0.0806581	0.00259263
40.523	2.55172	69836.7	167774	9983.25	104745	5495.8	1604.56	52062.5	522.517	184.581	213.832	0.078695	0.00306189
40.754	2.56069	69089.7	167255	9824.76	107622	5488.95	1602.25	50122.4	522.17	185.648	212.022	0.0794467	0.00306879
40.984	2.56966	66116.1	163233	9309.17	118828	5223.77	1783.22	46456.2	574.464	181.578	185.233	0.079009	0.00280164
41.214	2.57862	60173.2	149815	7590.6	142073	4661.74	2229.19	40848.4	618.211	170.687	177.207	0.077472	0.00294496
41.444	2.58759	61360.6	150313	7653.38	136587	4766.56	2111.57	42641.4	620.004	171.838	187.826	0.0776811	0.00306102
41.674	2.59655	62087.9	150468	7632.03	132816	4886.77	1971.32	43284.4	641.492	176.558	153.593	0.0787072	0.00247379
41.904	2.60552	63640.1	154150	8288.07	126574	4902.77	1769.67	45885.1	625.648	174.106	221.083	0.0770391	0.00347395
42.134	2.61448	66927.7	165835	9706.31	114978	5271.38	1521.22	47397	535.297	184.956	189.198	0.0787622	0.0028269
42.364	2.62345	66616.5	166779	9858.74	117254	5238.44	1489.81	46596.7	542.026	184.502	189.423	0.0786358	0.00284348
42.594	2.63241	64799.5	161490	9251.51	123602	5005.5	1617.18	45957.5	588.781	178.804	186.671	0.0772459	0.00288074
42.825	2.64138	64722.5	158508	8631.17	126089	5137.31	1531.33	45604.6	590.378	180.014	178.71	0.0793744	0.00276117
43.055	2.65034	66659.3	157017	8397.18	119950	5393.66	1592.77	49161.9	656.564	179.937	163.204	0.0809139	0.00244833
43.285	2.65931	63117.9	152057	7835.57	132748	5000.54	1808.35	44986.6	664.209	174.126	169.465	0.0792254	0.0026849
43.515	2.66828	63902.8	152682	7944.29	125862	5023.93	1948.12	45582	649.608	176.567	182.717	0.0786182	0.0028593
43.745	2.67724	65767.9	157883	8568.37	118508	5222.08	1809.3	46910.1	624.621	182.933	155.323	0.0794017	0.00236169
43.975	2.68621	67462.8	161454	9043.42	110420	5375.78	1764.48	47933.8	594.099	187.876	167.05	0.079685	0.00247617
44.205	2.69517	67203.9	159151	8740.22	114390	5372.39	1778.8	49171.7	646.071	183.276	150.205	0.0799415	0.00223507
44.435	2.70414	66525.3	161511	9263.79	113607	5184	1767.72	47560.2	617.595	183.499	184.252	0.0779252	0.00276966
44.665	2.7131	66757.3	163975	9543.4	112316	5183.19	2071.21	46943.8	576.718	182.55	204.941	0.0776423	0.00306995
44.896	2.72207	63590.9	160421	9076.51	126216	4826.89	2777.69	44554.3	584.271	171.392	190.921	0.0759054	0.00300233
45.126	2.73103	68251.7	171307	10525.9	108713	5324.44	2241.63	48275.9	526.661	183.156	182.062	0.0780119	0.00266751
45.356	2.74	71624.7	175006	11083	94503	5567.4	2325.03	52118.7	473.285	187.968	216.57	0.0777301	0.00302368
45.617	2.75017	68857.4	169330	10125.3	106404	5416.78	2241.23	48586.9	516.524	183.726	222.956	0.0786666	0.00323794
45.878	2.76035	63932.6	156999	8561.54	123776	4939.57	2048.15	44760.7	584.76	177.036	209.064	0.0772621	0.00327008
46.139	2.77052	65450.7	159678	8766.39	118133	5137.64	2107.34	45805.2	568.872	182.056	170.732	0.0784964	0.00260855
46.4	2.7807	64250.1	158806	8756.7	122325	5011.92	2042.89	44216.9	578.373	179.789	199.803	0.0780065	0.00310976
46.661	2.79087	60599	150203	7716.39	140638	4643.4	2374.81	41966.3	646.103	168.161	183.993	0.0766249	0.00303624
46.923	2.80105	58056.7	143555	6959.25	148492	4454.56	2530.18	38866.4	690.599	167.316	178.406	0.0767277	0.00307296
47.184	2.81122	59569.5	144965	6973.04	143740	4604.67	3175.92	41014.7	671.749	165.186	169.377	0.0772992	0.00284335
47.445	2.8214	60145	143797	6770.91	136209	4674.18	4211.51	41162.9	666.112	166.496	176.036	0.0777152	0.00292686
47.706	2.83157	61508.2	145790	7082.36	127089	4730.11	5157.23	42897.5	675.985	165.821	199.767	0.0769021	0.0032478
47.9683	2.84175	67083.7	151177	7582.85	108201	5421.46	4689.15	49257.9	725.843	174.759	167.549	0.0808164	0.0024976
48.228	2.85192	66193.4	148888	7475.63	110359	5265.3	4277.3	49116.3	774.584	172.527	187.309	0.0795441	0.00282972
48.4898	2.8621	68496.7	154070	8123.92	104356	5601.83	2905.86	50709.3	782.194	181.689	171.934	0.0817826	0.0025101
48.7515	2.87227	68427.5	152939	7885.98	103189	5617.63	3647.83	50303.9	779.139	181.569	154.731	0.0820962	0.00226124
49.0133	2.88245	68270.6	151278	7651.02	103219	5628.9	4644.23	50002.3	805.695	177.527	177.355	0.0824498	0.00259782
49.2725	2.89262	68630.1	153011	7898.62	101546	5640.39	3915.18	50043.1	758.342	180.234	198.411	0.0821854	0.00289101
49.5728	2.90429	67828.1	149177	7607.59	102603	5490.9	4324.84	50444.2	864.863	175.619	212.252	0.0809532	0.00312926
49.8371	2.91464	70177.2	156145	8395.41	92763.4	5774.75	3466.46	50202.3	751.769	190.266	187.033	0.0822882	0.00266515
50.104	2.925	65073.2	149838	7819.95	112903	5031.8	3139.14	47402	749.434	173.696	245.151	0.0773252	0.00376731
50.37	2.93536	65274.3	152915	8495.04	114229	4762.51	2617.73	51430.1	667.565	165.402	298.416	0.0729615	0.00457172
50.635	2.94571	67577.5	156740	8662.2	104296	5210.86	2489.1	49746.1	641.09	181.237	231.938	0.0771094	0.00343218
50.901	2.95607	68218.8	160467	9201.31	106612	5232.91	1659.24	51318.7	586.647	181.047	260.009	0.0767077	0.00381139
51.167	2.96643	68868.6	161200	9292.71	102730	5298.03	1849.03	52264.2	597.468	183.783	202.714	0.0769296	0.00294349
51.433	2.97679	69406.6	162014	9398.88	103649	5340.16	1791.43	53817.8	592.977	180.027	226.843	0.0769402	0.00326833
51.699	2.98714	69795.4	165728	9839.41	100832	5373.25	1875.62	52197	541.998	184.761	223.306	0.0769857	0.00319943
51.965	2.9975	70363.3	171150	10433.7	103023	5545.72	1919.77	51897.1	517.965	184.747	191.695	0.0788154	0.00272436
52.231	3.00786	71269.6	172297	10535.2	98060.6	5599.68	2249.93	52346	491.697	186.499	194.897	0.0785704	0.00273464
52.496	3.01821	66589.8	160877	8961.81	114519	5149.88	2496.24	47917.5	548.394	175.998	238.014	0.0773375	0.00357434
52.762	3.02857	66470.9	163095	9484.44	118829	5107.85	1575.55	49588.1	583.048	177.592	174.331	0.0768435	0.00262266
53.028	3.03893	69833.4	171330	10482.3	104825	5565.87	1434.08	49626.3	529.453	191.171	190.005	0.079702	0.00272083
53.294	3.04929	67326	164314	9635.34	113128	5156.57	1721.11	49266.1	556.972	179.788	218.469	0.0765911	0.00324494
53.56	3.05964	68808.5	166955	9819.45	110191	5398.72	1476.92	50408.5	530.972	184.68	193.326	0.07846	0.00280963
53.825	3.07	69980.2	164054	9462.87	100869	5399.21	2515.37	53739.1	534.326	179.285	212.867	0.0771533	0.00304182
54.129	3.08182	71431.2	165400	9629.81	94107.8	5506.09	2772.36	55247.8	505.611	181.405	228.979	0.0770824	0.00320559
54.4307	3.09364	73091	167384	9836.85	88269.5	5729.54	2565.79	56634.3	479.358	186.798	225.651	0.0783891	0.00308726
54.735	3.10545	73992.5	172668	10539.8	90080.5	5885.33	2111.32	57563.4	482.779	188.743	174.157	0.0795396	0.00235371
55.039	3.11727	70996	166033	9786.84	95841.6	5503.19	2596.86	54362	529.135	181.946	221.862	0.0775141	0.00312499
55.342	3.12909	70347.4	167693	9948.92	102009	5475.46	1834.85	52986.8	510.314	183.984	209.831	0.0778346	0.00298279
55.645	3.14091	68792.8	164822	9511.74	107939	5370.15	1896.96	50866.8	537.064	182.098	202.47	0.0780626	0.00294319
55.949	3.15273	69491	164722	9332.41	105002	5484.58	2638.19	51348.2	547.673	181.786	168.189	0.0789251	0.0024203
56.252	3.16455	71784.4	164808	9327.65	97592.6	5806.21	2338.1	54283.5	561.076	184.881	196.474	0.0808839	0.002737
56.555	3.17636	70292.8	164684	9404.03	105283	5712.47	1564.3	52637.1	578.131	185.757	191.849	0.0812669	0.00272929
56.859	3.18818	62885.5	154703	8488.8	129593	4699.88	2238.15	45485.5	639.857	167.995	233.129	0.0747372	0.00370719
57.162	3.2	66703.1	164524	9672.32	114092	5085.12	2030.7	48252.8	556.303	178.629	206.289	0.0762351	0.00309265
57.465	3.21182	68253.8	169700	10385.2	108867	5261.06	1857.77	48791.9	526.655	183.136	214.02	0.0770808	0.00313565
57.769	3.22364	71039.1	171796	10407.3	98295.4	5636.97	1951.12	51200.8	484.183	190.787	191.085	0.0793502	0.00268986
58.072	3.23545	68124.7	169224	10181.5	110885	5284.09	1959.28	48495.7	526.995	182.75	191.626	0.0775649	0.00281286
58.375	3.24727	66842.8	165908	9734.86	114339	5150.64	2136.31	47309	546.443	180.72	187.25	0.077056	0.00280135
58.679	3.25909	65851	165192	9728.48	118345	5023.76	2381.39	46264.4	558.958	175.426	226.846	0.0762897	0.00344483
58.982	3.27091	69818.6	174389	11054.4	104752	5455.14	1460.48	49314.5	504.865	189.389	216.005	0.0781331	0.0030938
59.285	3.28273	75116.5	175556	11092.8	87860.3	6164.07	1491.02	56265.2	542.865	197.651	180.714	0.0820601	0.00240579
59.589	3.29455	75047.5	169723	10301.2	86448.1	6338.19	1317.29	56105.4	649.566	202.505	170.36	0.0844558	0.00227003
59.892	3.30636	75038.4	169498	10421.5	83876.3	6216	1477.7	56432.9	640.59	201.017	193.395	0.0828377	0.00257728
60.195	3.31818	74412.8	172368	10679.9	88441.2	6120.59	1527.68	55249.2	582.157	197.687	193.27	0.0822518	0.00259726
60.4985	3.33	75366.5	168279	10167.6	84703	6303.94	1581.34	57615	664.526	197.583	195.624	0.0836438	0.00259564
60.802	3.34182	74680.8	165100	9661.88	85911.6	6208.89	1871.37	57337.2	667.291	193.723	212.883	0.0831391	0.00285057
61.1047	3.35364	75055.8	165019	9567.43	82684.6	6260.33	2821.48	57267.8	672.534	192.62	190.009	0.083409	0.00253157
61.4099	3.36545	71894.1	160733	8974.76	94707.6	6042.91	1768.79	52597.6	718.538	193.696	209.636	0.084053	0.0029159
61.7126	3.37727	72003.9	161371	9141.55	94646.6	6112.29	1422.46	52238.2	762.775	198.211	191.271	0.0848884	0.00265639
62.0153	3.38909	72831.5	163591	9409.21	93657.1	6211.33	1505.55	53407.7	761.206	197.271	177.05	0.0852835	0.00243096
62.318	3.40091	71341.3	162569	9408.69	98861.7	5920.69	1367.33	52830.6	744.913	192.071	204.316	0.0829912	0.00286392
62.622	3.41273	71430.9	171549	10688.1	95316.7	5746.95	1815.35	51183.3	599.025	194.565	174.864	0.0804546	0.00244801
62.925	3.42455	69784.9	168018	9910.06	105763	5534.06	1864.86	50916.9	546.38	185.116	187.381	0.0793016	0.00268512
63.228	3.43636	68282.9	168380	9976.3	106125	5316.66	2620.47	48172.3	508.873	183.974	186.451	0.0778623	0.00273056
63.532	3.44818	69658.7	169843	10138.4	108195	5582.65	1403.02	50461.8	527.111	188.618	170.97	0.080143	0.0024544
63.835	3.46	79091.6	176680	11257.9	74109.5	6719.09	1485.48	60144.4	536.144	207.617	193.079	0.0849533	0.00244121
64.0707	3.46923	79479.6	176717	11197.1	72503	6814.25	1734.18	59945.2	545.159	208.535	181.823	0.0857358	0.00228767
64.309	3.47846	79224.4	177494	11464.4	73874	6740.98	1269.65	60027.7	543.599	210.298	191.862	0.0850872	0.00242175
64.546	3.48769	77074.6	172668	10640.9	79635	6580.77	1473.69	57123.7	583.123	204.651	224.811	0.0853818	0.0029168
64.7818	3.49692	79420.1	176799	11314.6	72151.6	6757.73	1741.93	60036.1	553.295	207.621	193.582	0.0850884	0.00243744
65.0202	3.50615	78223	171706	10619.2	73187.8	6551.29	2481.16	59867.4	608.189	200.723	197.526	0.0837515	0.00252517
65.256	3.51538	79197	179160	11619.2	69358.6	6662.13	2572.38	57942.3	504.383	208.335	192.006	0.084121	0.00242441
65.4921	3.52462	83547.5	184287	12973.4	61428.9	6971.84	1791.96	67766.9	503.502	206.845	204.263	0.0834476	0.00244487
65.7309	3.53385	83762	183812	12680.7	58489.5	7008.37	2473.08	65840.7	464.661	209.574	210.175	0.08367	0.00250919
65.967	3.54308	74571.5	176780	11099.6	83103.5	6164.98	2932.43	51963.1	521.021	200.861	169.382	0.0826721	0.00227141
66.204	3.55231	69239.9	178340	11742.3	106321	5471.22	1386.89	46249.2	526.232	194.165	200.176	0.0790183	0.00289105
66.441	3.56154	67182.1	170115	10476.9	115715	5283.58	1358.79	46038.7	572.457	186.89	200.764	0.0786456	0.00298836
66.678	3.57077	59141.7	147614	7746.76	151361	4487.53	1594.3	42130.1	796.713	164.782	164.536	0.0758776	0.00278207
66.915	3.58	69603.7	162423	9225.4	108385	5665.56	1517.84	53793	647.477	182.941	154.771	0.0813974	0.0022236
67.153	3.58929	71172.5	163967	9507.58	103067	5779.96	1425.71	56227.2	633.278	182.713	192	0.0812106	0.00269767
67.392	3.59857	71366.8	164373	9443.14	104741	5860.28	1576.6	56557.6	645.603	181	169.633	0.0821149	0.00237692
67.63	3.60786	71246	163226	9239.14	104094	5921.24	1456.45	55071.9	667.357	186.095	156.906	0.0831097	0.00220232
67.868	3.61714	71357.7	164025	9178.38	102939	6054.51	1486.35	53175.8	634.681	190.72	158.122	0.0848472	0.0022159
68.107	3.62643	67352.6	155459	8211.5	117621	5682.36	1379.29	48397.9	766.857	184.406	187.695	0.0843674	0.00278676
68.345	3.63571	69966.5	162910	9246.85	107500	5849.03	1361.36	51453.5	679.168	187.166	201.118	0.0835976	0.00287449
68.5835	3.645	71715.7	166992	9933.4	100160	5958.53	1376.51	53921.1	657.415	189.294	196.828	0.0830855	0.00274456
68.822	3.65429	75046.7	171583	10573.9	89661.7	6265.54	1337.93	59324.9	591.981	192.549	182.352	0.0834885	0.00242984
69.06	3.66357	73842.6	171101	10435.7	92187.7	6125.34	1264.4	56300.5	558.803	195.152	192.373	0.0829513	0.00260518
69.298	3.67286	69464.4	159186	8646.17	110618	5833.1	1382.22	51968.6	699.936	185.377	174.287	0.0839725	0.00250901
69.536	3.68214	72601.2	166890	9920.82	97588.9	5969.36	1350.42	56225.6	634.854	188.438	197.659	0.0822212	0.00272254
69.775	3.69143	75106.1	175246	11084.6	88340.9	6234.35	1196.08	57471.3	531.731	198.482	178.683	0.0830073	0.00237907
70.013	3.70071	70846.5	160740	9367.07	100521	5816.11	1336.5	55070.2	820.609	187.684	172.332	0.0820945	0.00243247
70.251	3.71	60601.3	152973	8617.47	140818	4578.54	1474.39	42715.6	803.486	169.974	189.092	0.0755517	0.00312027
70.679	3.72667	75904	175500	11370.8	86556.2	6203.37	1262.44	60055.4	563.276	192.394	223.835	0.0817266	0.00294892
71.107	3.74333	78022.3	178833	11892.8	79124.7	6430.48	1092.17	62010.1	510.442	199.968	221.737	0.0824186	0.00284197
71.535	3.76	70280.5	164896	9679.59	103597	5689.94	1181.35	53135.3	603.921	189.184	195.659	0.0809604	0.00278398
71.815	3.77091	59700.5	147385	7982.76	144781	4467.61	1373.9	43501.2	854.547	165.318	214.593	0.0748337	0.0035945
72.095	3.78182	51252.1	132545	6554.57	185718	3630.48	1879.4	35365.4	993.4	147.494	206.04	0.0708358	0.00402012
72.375	3.79273	53013.6	136648	6807.59	177055	3897.72	1941.79	35929.4	981.984	155.248	145.616	0.0735231	0.00274677
72.655	3.80364	53907.5	137175	6846.92	171155	3969.82	2105.38	37329.6	1005.23	156.05	134.342	0.0736415	0.00249209
72.935	3.81455	60134.4	145996	7763.89	139598	4528.44	1787.38	44614.3	904.358	165.953	167.215	0.0753054	0.00278069
73.215	3.82545	63811.7	152337	8322.76	128315	4988.18	1720.39	47876.3	861.332	171.542	160.468	0.0781704	0.00251472
73.495	3.83636	65238.5	155145	8728.95	120498	5068.39	1660.46	49191.1	813.073	174.84	180.021	0.0776901	0.00275942
73.775	3.84727	65689.6	158102	9124.64	118942	5106.33	1517.32	49106.7	759.117	176.858	190.805	0.0777342	0.00290465
74.055	3.85818	65387.6	155650	8773.19	121238	5101.66	1675.79	50107.7	799.001	172.927	176.713	0.0780218	0.00270254
74.335	3.86909	66883.9	160079	9266.46	114296	5287.32	1582.01	50105.8	735.303	180.57	163.438	0.0790523	0.00244361
74.615	3.88	59581.5	149238	8177.18	141881	4488.79	1764.19	41933.9	866.942	168.829	169.131	0.0753386	0.00283865
74.841	3.88882	60399.1	152647	8779.18	137183	4406.41	1670.56	44036.3	784.453	166.981	198.604	0.0729548	0.00328819
75.068	3.89765	61097.5	148747	8018.52	137017	4571.52	1561.67	45740.9	794.592	167.897	173.501	0.0748233	0.00283974
75.294	3.90647	63482.1	157964	9452.32	127778	4639.7	1604.66	49139.2	731.463	166.25	208.293	0.0730868	0.00328112
75.52	3.91529	67586.5	161990	9824.64	113350	5153.92	1548.48	53784.6	736.03	172.559	203.08	0.0762567	0.00300475
75.747	3.92412	74717.4	176650	11966.5	87998.4	5852.2	1229.99	60511.9	554.777	187.604	242.702	0.0783244	0.00324827
75.973	3.93294	77183.9	180256	12429.9	82563.6	6153.68	1228.75	63974.8	537.789	190.445	203.815	0.0797276	0.00264064
76.2	3.94176	80083.9	185300	13093.1	74867.3	6532.02	1188.31	65800.4	482.256	197.521	206.722	0.0815647	0.00258132
76.426	3.95059	79561.9	185302	13379.7	74677.4	6329.54	1228.19	66411.1	478.19	193.649	241.024	0.0795549	0.00302939
76.653	3.95941	80845.9	187395	13701.1	71324.7	6497.22	1209.15	67291.4	465.557	197.233	230.361	0.0803655	0.00284938
76.879	3.96824	76547.7	177678	11753.8	81013.8	6456.42	1092.36	57435.4	548.582	203.237	262.788	0.0843451	0.003433
77.106	3.97706	78519.1	183747	12874	78984.5	6348.45	1317.45	64164.4	514.265	194.25	187.055	0.0808524	0.00238229
77.332	3.98588	77559.7	183338	12806.8	79383.3	6282.24	1228.55	60233.6	495.27	198.17	244.651	0.0809988	0.00315436
77.559	3.99471	76601.1	178853	11989	83715.8	6304.33	1266.31	59195.1	554.547	194.27	272.522	0.0823009	0.00355768
77.785	4.00353	80435.7	187169	13598.4	71943.1	6534.89	1201.9	65090	480.896	200.4	222.574	0.0812435	0.0027671
78.011	4.01235	79047.4	185538	13240.6	76896.7	6443.42	1308	62885.9	515.366	196.209	234.169	0.0815134	0.00296239
78.238	4.02118	74038.7	174796	11191.4	91917.3	6078.16	1316.55	55898.5	596.709	194.627	184.22	0.0820943	0.00248816
78.464	4.03	58089.5	145749	7899.25	149442	4310.21	1794.32	40915.8	960.074	163.179	192.464	0.0741995	0.00331324
78.721	4.04	59939.9	149695	8235.63	142705	4570.15	1750.32	42072.3	939.579	168.702	161.116	0.0762455	0.00268796
78.978	4.05	61619.4	153679	8855.31	134415	4642.27	1679.9	44217.4	887.649	169.248	200.468	0.0753378	0.00325332
79.234	4.06	64335.9	161664	9849.16	124990	4882.7	1560.76	46807.5	773.784	173.926	190.309	0.0758938	0.00295805
79.491	4.07	68002.3	168277	10660.5	112243	5301.26	1368.15	50267.5	698.575	180.394	210.898	0.077957	0.00310133
79.748	4.08	74487.2	177822	11797.6	90861.3	6009.11	1220.61	57790.9	551.33	192.363	193.635	0.080673	0.00259957
80.004	4.09	69936	170071	10834.6	105875	5524.55	1327.63	52424.8	682.795	183.531	210.962	0.0789944	0.0030165
80.261	4.1	67920.1	171543	11064.5	111467	5381.97	1374.05	47419	701.722	187.858	172.377	0.0792398	0.00253794
80.518	4.11	62459.7	159359	9412.22	132746	4757.22	1703.62	43293.1	762.115	172.883	197.992	0.0761647	0.00316991
80.774	4.12	61063.8	151675	8394.39	136683	4610.94	1903.88	43496.4	833.701	169.228	174.521	0.0755102	0.00285801
80.975	4.13	60726.4	148007	7873.94	138067	4604.73	2038.54	43680.9	884.184	168.067	160.871	0.0758276	0.00264911
81.17	4.14	61252.5	149011	8072.01	136868	4578.33	2363.28	46023.6	881.844	162.398	167.952	0.0747451	0.00274197
81.382	4.15091	61922.3	150457	8114.87	133079	4666.9	2300.26	45878.4	818.262	167.404	148.679	0.075367	0.00240105
81.594	4.16182	58458.1	142845	7300.13	146891	4243.82	2816.33	44156.9	827.709	156.479	156.794	0.072596	0.00268217
81.806	4.17273	57875.8	140662	7128.29	145891	4152.91	3037.83	43791.3	856.586	155.704	165.373	0.0717557	0.00285738
82.019	4.18364	57019.2	139132	7014.23	150263	4049.13	3503.72	43886.6	865.991	149.711	184.179	0.0710134	0.00323013
82.231	4.19455	56547	137096	6791.46	150870	4003.58	3406.88	42696.1	874.101	149.866	225.557	0.070801	0.00398884
82.443	4.20545	56158.5	136586	6960.68	150300	3829.8	3439.41	43829.4	872.008	144.755	305.062	0.0681963	0.00543215
82.655	4.21636	57039	138000	7184.9	143215	3817.91	3165.33	44628.8	793.747	145.718	453.155	0.0669351	0.00794465
82.868	4.22727	55143.2	133217	6930.84	153824	3529.33	2971.7	44902.7	855.271	133.87	822.841	0.0640029	0.0149219
83.08	4.23818	57344	137821	7505.75	147124	3690.6	2289.54	48254.8	814.792	135.486	943.319	0.0643591	0.0164502
83.292	4.24909	59628.2	145029	8297.91	135552	4020.33	1691.86	47055.2	757.418	148.477	937.151	0.0674233	0.0157166
83.504	4.26	59246.4	138300	7909.05	127940	3633.61	1656.57	55589.5	715.496	138.914	1046.87	0.0613305	0.0176697
83.755	4.27286	55742.6	126952	6572.29	143819	3344.66	2015.37	54828.1	848.292	128.169	941.443	0.0600017	0.0168891
84.005	4.28571	57021.5	130072	6994.94	136440	3397.65	1778.56	56658.8	812.096	131.918	886.082	0.0595855	0.0155394
84.255	4.29857	62479.2	140209	8196.81	111961	3755.59	1628.03	65632.8	640.809	140.435	796.991	0.0601094	0.0127561
84.504	4.31143	54815.5	124049	6548.04	143104	3082.52	2167.11	60361.7	853.466	121.029	813.915	0.0562345	0.0148483
84.755	4.32429	60099.6	138842	7856.06	127883	3788.99	1829.61	58063	771.453	138.64	701.499	0.0630453	0.0116723
85.005	4.33714	61359.6	145559	8065.59	127038	4217.33	2314.16	50595.8	733.346	152.367	457.189	0.0687314	0.00745097
85.255	4.35	65116.8	159686	9632.47	114559	4768.99	2119.42	48417.1	668.358	170.12	342.639	0.0732374	0.00526192
85.516	4.36341	68120.9	165008	10219.3	107159	5168.79	2027.2	51480.2	672.265	174.911	277.263	0.0758766	0.00407016
85.777	4.37682	72885.9	174152	11296.3	93273.2	5908.82	1654.58	53720.2	646.228	190.656	221.314	0.0810695	0.00303644
86.016	4.39023	77955	184587	12949	78655.4	6515.75	1421.49	57135.4	565.903	201.534	261.535	0.0835835	0.00335495
86.253	4.40364	81307.4	192052	13990.3	69565.4	7032.84	1151.97	58660.2	472.087	215.793	228.107	0.0864969	0.00280549
86.49	4.41705	78364.4	188161	13607.9	76698.3	6584.72	1284.82	57019.7	526.796	205.22	255.709	0.084027	0.00326308
86.7272	4.43045	75740.3	179780	11900.3	86578.3	6572.64	1189.43	53447.8	620.653	204.221	230.597	0.0867786	0.00304458
86.9645	4.44386	73453.7	171353	10291.8	95964.2	6541.84	1211.47	50229.7	674.703	200.558	261.944	0.0890607	0.00356611
87.2018	4.45727	75278.6	174340	10617.8	87465.6	6882.49	985.105	49254.3	617.705	215.225	276.905	0.091427	0.00367841
87.439	4.47068	79761.1	185426	12648.5	76369.9	6953.4	1338.77	58057.5	563.959	209.203	187.457	0.0871778	0.00235023
87.676	4.48409	79000.4	184999	12873.6	75649.4	6771.65	1142.85	56382	545.566	210.005	283.773	0.0857166	0.00359205
88.624	4.53773	70418	177095	11748.5	103917	5651.25	1410.13	49375.2	627.615	190.641	190.307	0.0802529	0.00270254
88.865	4.55134	76281.5	186165	13075.1	83522.2	6392.86	1212.2	53621.6	543.045	206.794	204.696	0.0838061	0.00268343
89.1	4.56463	79923.7	191456	13804	76407.2	6947.87	1206.83	57954.4	530.909	209.862	179.379	0.0869314	0.00224437
89.335	4.57792	74265.1	184140	12742.4	92132.6	6136.96	1033.08	52691.8	527.882	199.721	234.986	0.0826359	0.00316415
89.569	4.5912	66355.5	171553	11017.5	121397	5263.96	1176.9	45183.4	696.545	185.437	173.427	0.0793298	0.00261361
89.804	4.60449	67043.7	171192	10966	118955	5263.96	1363.17	47013.3	668.917	179.855	225.685	0.0785154	0.00336624
90.039	4.61778	69598.8	171418	10623.1	108172	5782.85	1304.22	47665.6	671.504	192.408	195.384	0.0830883	0.00280728
90.274	4.63107	69479	167126	9702.22	112308	5968.45	1429.31	47888.5	718.639	190.211	169.152	0.085903	0.00243457
90.509	4.64436	69042.6	170433	10395.4	110255	5806.12	1294.52	46324.2	694.883	194.953	168.057	0.0840947	0.0024341
90.744	4.65765	68651.2	163660	9219.97	115496	5941.47	1425.4	46741.5	770.544	189.052	183.055	0.0865458	0.00266644
90.979	4.67093	68357.6	163053	9234.03	114564	5843.92	1474.12	46749.7	768.034	188.175	196.05	0.0854904	0.002868
91.214	4.68422	67805.7	164132	9484.52	118207	5686.9	1464.52	46935.2	771.314	184.459	187.079	0.0838706	0.00275904
91.449	4.69751	70414	180232	12437.9	104212	5538.45	1146.26	49061.1	573.072	189.663	265.327	0.0786556	0.0037681
91.684	4.7108	71239.5	177941	11859.7	103685	5767.44	1245.21	50574.8	633.963	190.131	204.539	0.0809584	0.00287115
91.919	4.72409	72036.4	177745	12075.3	96998.6	5860.93	1186.79	50862.4	669.214	194.547	241.208	0.0813607	0.00334842
92.154	4.73738	72701.5	177077	11791	97049.7	6052.46	1119.12	51901.1	692.516	196.439	198.866	0.0832508	0.00273537
92.389	4.75067	67187.1	170933	10777.9	116610	5436.8	1122.07	45084.9	665.475	189.645	208.667	0.0809203	0.00310576
92.624	4.76396	61124.2	160113	9479.91	146658	4709.73	1313.13	41297	757.57	169.174	216.573	0.0770519	0.00354316
92.858	4.77724	58454	149683	8104.68	156260	4525.1	1377.59	39189.6	859.686	166.675	197.475	0.077413	0.00337829
93.093	4.79053	55533.6	144081	7497.09	170001	4249.4	1504.07	36616.8	916.574	162.303	161.505	0.0765194	0.00290824
93.328	4.80382	55386.6	144150	7565.43	166402	4231.14	1426.75	35581.6	922.909	166.377	171.99	0.0763929	0.00310526
93.563	4.81711	56255.8	144853	7549.9	164605	4322.07	1601.77	37005.6	908.608	163.992	171.82	0.0768289	0.00305426
93.798	4.8304	56189.3	146731	7723.77	163003	4332.73	1610.79	35717.8	864.845	168.544	155.016	0.0771095	0.00275882
94.033	4.84369	53619.5	140910	7148.3	177348	4049.8	1844.47	34234.6	895.777	158.262	185.11	0.0755285	0.00345229
94.268	4.85698	54332.3	142465	7349.12	171391	4129.77	1741.49	34754.7	904.406	162.025	174.746	0.0760095	0.00321624
94.503	4.87026	50262.7	132314	6251.59	197741	3803.51	1996.98	31402.1	1012.87	151.079	168.139	0.0756726	0.0033452
94.738	4.88355	51165.2	134697	6561.46	188702	3819.63	1897.71	32239.7	990.833	155.028	163.503	0.074653	0.00319559
94.973	4.89684	52473.6	136789	6669.68	183878	3999.3	1847.46	33088.9	978.688	157.603	162.308	0.0762154	0.00309314
95.208	4.91013	55012.2	140731	7099.83	167555	4264.32	1775.4	35455.4	1010.18	164.038	159.311	0.0775159	0.00289593
95.443	4.92342	56469.8	138155	6932.35	157135	4444.13	1699.96	38374.4	1262.95	165.824	148.436	0.0786992	0.00262859
95.678	4.93671	54986.7	139596	7027.39	166428	4294.26	1551.47	35278.2	1115.16	167.878	135.738	0.0780963	0.00246856
95.91	4.94983	55325.9	146551	7737.18	167557	4255.96	1523.05	34546.1	833.848	167.441	172.842	0.0769253	0.00312406
96.14	4.96283	55725.5	146937	7757.99	166246	4308.87	1658.45	35213.3	835.199	165.587	182.596	0.0773231	0.00327671
96.369	4.97583	54348.6	145035	7646.61	171043	4095.31	1703.82	33965.2	818.246	162.848	204.292	0.0753526	0.00375892
96.599	4.98883	57328.9	146109	7531.22	163475	4455.52	1538.52	38752.8	821.123	162.397	186.932	0.0777185	0.00326069
96.807	5.00058	73011.6	173655	11310.4	94731.2	5846.84	1157.88	56551	610.645	190.01	209.312	0.080081	0.00286683
96.998	5.01139	74759.8	176698	11986	88467.7	5995.89	1201.67	58903.9	621.705	190.23	236.886	0.0802021	0.00316863
97.189	5.02221	75133.1	178901	12456.3	86837.6	5963.09	1185.07	59691.4	607.14	190.835	222.655	0.079367	0.00296347
97.381	5.03303	75015.9	176434	11984.3	88279.8	5958.63	1288.89	60719.5	631.381	187.429	215.268	0.0794315	0.00286963
97.572	5.04384	75614.1	176278	11768.6	88288.8	6167.89	1222.62	60291.2	663.341	191.151	187.188	0.0815706	0.00247557
97.763	5.05466	73532.3	171622	10762.4	94560.3	6214.76	1102.6	53450.2	692.272	195.851	254.442	0.0845175	0.00346028
97.954	5.06548	77720.7	180765	12309.5	81260.1	6531.74	1160.93	60350.3	617.556	201.665	161.465	0.0840412	0.00207751
98.146	5.07629	77295	182603	12934.3	81274.9	6336.78	1081.73	60537.5	580.47	196.872	239.333	0.0819818	0.00309635
98.337	5.08711	78996.1	185185	13354.2	77178.3	6423.25	1172.76	63766.4	533.292	195.02	248.992	0.0813109	0.00315196
98.528	5.09793	72413.6	176584	11606.3	99920.9	5851.71	1180.49	54109.7	597.684	188.714	211.761	0.0808096	0.00292433
98.677	5.10636	64738.2	167361	10439.5	124889	5036.59	1181.75	43631.4	661.268	183.01	219.115	0.0777994	0.00338463
98.814	5.11411	65612.2	168066	10504.6	123168	5059	1212.49	46638	629.932	180.02	190.955	0.0771046	0.00291036
98.951	5.12185	69305.9	173829	11309.3	109347	5368.17	1166.94	51401.3	565.224	183.802	207.731	0.0774562	0.0029973
99.088	5.12959	73941.6	181482	12745.3	91941.2	5768.2	1121.4	57421.9	537.866	189.903	218.041	0.0780102	0.00294883
99.225	5.13733	82317.5	194955	14990.4	70990.2	6687.55	1037.3	68597.3	438.997	198.77	197.575	0.0812409	0.00240016
99.362	5.14508	81876.5	196110	14630.6	74058.8	6854.93	962.947	65578.6	402.052	203.298	176.902	0.0837227	0.00216059
99.466	5.15097	62898	160545	9565.23	135790	4807.08	1256.55	44981.6	738.946	172.529	182.926	0.0764267	0.00290829
99.546	5.15548	62513.1	160263	9607.2	135854	4710.48	1295.4	44917.3	723.555	171.221	193.228	0.0753519	0.003091
99.625	5.15999	62629	159266	9287.48	134457	4741.42	1461.78	44734.1	676.404	171.7	196.092	0.0757064	0.003131
99.705	5.16449	61503.4	155263	8734.11	138784	4620.88	1688.4	44411.1	707.838	168.477	169.406	0.0751321	0.00275442
99.785	5.169	61514.9	153890	8530.14	137789	4670.67	1826.36	44405.1	751.956	169.345	150.914	0.0759274	0.00245329
99.864	5.17351	61250	152669	8466.81	136541	4537.52	1827.77	45074.2	720.273	167.495	170.374	0.074082	0.00278162
99.944	5.17802	61149.4	153163	8688.47	137982	4463.7	1830.67	46544.5	732.511	162.659	182.993	0.0729966	0.00299256
100.024	5.18253	61529.5	153645	8523.63	137789	4623.79	1975.63	45313.9	744.824	166.643	150.434	0.0751474	0.00244491
100.103	5.18704	62051.9	154013	8572.26	136032	4638.78	1857.71	46924.7	711.736	165.792	156.238	0.0747564	0.00251786
100.183	5.19155	64564.4	157053	9053.24	127665	4856.67	1602.03	51012.2	738.403	166.664	172.119	0.0752221	0.00266585
100.326	5.19962	75186.2	182349	12578.7	91316.4	5925.71	1141.01	60174.8	487.399	187.458	214.266	0.0788139	0.0028498
100.574	5.21368	72514.7	174106	10911.3	103061	5904.38	1476.97	56745.4	592.668	183.183	148.544	0.0814233	0.00204846
100.823	5.22774	73018.2	174327	11003.1	100264	5897.41	1494.61	57888.9	574.37	182.787	163.355	0.0807663	0.00223719
101.072	5.2418	74372.7	178639	11907.9	93197	5820.59	1375.74	60515.1	484.217	182.372	228.784	0.0782624	0.00307618
101.32	5.25585	74148	177555	11755.9	94562.3	5847.06	1503.61	61582.7	528.503	180.808	173.068	0.0788567	0.00233409
101.569	5.26991	73215.8	177322	11718.3	99245.6	5786.57	1136.01	57753.9	534.564	183.183	234.512	0.0790344	0.00320303
101.827	5.28397	71954.8	172908	11167.2	101731	5626.38	1331.7	57958.6	581.332	178.338	228.104	0.0781932	0.0031701
102.219	5.29803	72659.4	170865	10687	100317	5761.74	1086.88	58583.1	556.104	181.63	255.546	0.0792979	0.00351704
102.612	5.31209	62440.8	152901	8683.4	131778	4553.06	1563.26	49231.3	742.423	165.486	171.936	0.072918	0.00275359
103.004	5.32614	63043.2	155203	9001.1	131072	4514.49	1733.43	51784.9	691.521	161.176	162.711	0.0716095	0.00258095
103.396	5.3402	79867.1	189404	14693.6	73391.3	6105.4	1267.76	68991.2	477.921	186.327	301.637	0.0764445	0.00377673
103.789	5.35426	68235.2	171843	10766.8	114399	5340.09	1262.56	49779.2	545.7	182.955	186.631	0.0782601	0.00273512
104.181	5.36832	62638.8	159040	9155.31	135941	4845.16	1476.74	43714.6	706.158	173.046	191.978	0.0773508	0.00306484
104.573	5.38238	71672.4	169915	10701.8	100138	5643.12	1415.76	55647.5	629.285	182.102	247.14	0.0787349	0.00344819
104.893	5.39382	85549.6	202267	16720.3	57502.9	6894.03	1185.17	67041.8	351.859	209.688	370.282	0.0805852	0.00432827
105.157	5.4033	62675.5	145368	8762.02	117755	3804.22	1389.98	64148	595.357	141.636	683.885	0.0606972	0.0109115
105.422	5.41278	61430.2	141494	8392.01	121485	3630.33	1513.02	65135.3	618.442	135.373	796.224	0.0590968	0.0129614
105.688	5.42226	59917.9	136018	7767.17	127653	3453.69	1608.98	67126.9	644.797	128.173	825.365	0.0576405	0.0137749
105.95	5.43174	60380.4	139930	8046.23	133470	3614.29	1493.42	64424.6	626.13	129.363	836.559	0.0598587	0.0138548
106.216	5.44123	60367.5	144725	8476.15	134726	3818.72	1404.14	55524.7	667.911	140.28	788.146	0.0632578	0.0130558
106.48	5.45071	60525.5	148531	8502.01	138194	4151.74	1691.07	48337.5	727.903	150.602	527.814	0.068595	0.00872054
106.745	5.46019	64043.3	153555	9176.37	122767	4336.82	1871.2	55089.4	661.257	151.136	508.073	0.0677169	0.00793326
107.009	5.46967	61872.3	146886	8171.35	128969	4322.44	2058.6	49623.2	808.799	155.836	380.417	0.0698606	0.00614843
107.274	5.47915	65035.9	156114	9232.65	117327	4802.87	1915.27	49975.2	778.078	166.811	339.403	0.0738495	0.00521871
107.539	5.48863	70000.5	169663	10874.5	99572.5	5350.6	1687.6	52427.5	603.343	182.605	284.335	0.0764366	0.00406189
107.801	5.49811	76316.5	182832	12351	84338.1	6389.39	1194.68	54710.5	515.034	203.861	236.527	0.0837222	0.00309929
107.866	5.50759	73267.2	173787	11352.2	92193.3	6130.1	1127.05	53491.2	713.832	198.585	202.937	0.0836678	0.00276982
107.93	5.51707	67139.3	162773	9669.79	112934	5460.55	1170.11	47611.8	737.508	188.283	202.222	0.0813317	0.00301198
107.995	5.52656	57226.1	146482	7717.98	159037	4375.82	1485.6	38172.8	841.752	165.693	191.831	0.0764655	0.00335216
108.06	5.53604	57858	149271	8100.05	153539	4425.29	1262.74	37592.5	822.501	172.553	190.695	0.0764854	0.00329591
108.125	5.54552	59806.3	154915	8742.92	145568	4633.81	1249.63	39071.4	772.171	176.338	184.122	0.0774803	0.00307865
108.19	5.555	61731.8	159086	9301.81	135847	4817.89	1194.1	40159.2	759.99	181.598	199.689	0.0780454	0.00323478
108.255	5.56448	62375.3	158696	9271.84	134367	4883.1	1055.23	41318.5	785.264	182.091	204.583	0.0782858	0.00327987
108.32	5.57396	70658.4	172450	10914.7	104322	5776.85	978.467	50329.8	630.745	194.699	200.194	0.0817575	0.00283327
108.385	5.58344	75456.9	181471	12112.8	88839.8	6283.41	1132.21	54794	526.844	200.184	222.59	0.0832714	0.00294989
108.45	5.59292	70816.6	170287	10535.3	102486	5883.16	1347.74	50190.1	717.283	194.381	165.063	0.083076	0.00233086
108.514	5.6024	69131.4	166381	10082.6	110828	5608.25	1375.07	50342.9	763.265	184.874	178.219	0.0811245	0.00257798
108.579	5.61189	69437.9	167538	10269.6	106227	5551.19	1132.13	50328	627.666	188.373	251.986	0.0799446	0.00362894
108.644	5.62137	69839.7	167951	10138.1	107936	5739.77	1481.51	49861.9	690.631	185.823	225.331	0.0821849	0.00322641
108.709	5.63085	71355.3	172447	10832.2	102210	5861.46	1350.7	51037.3	652.136	190.599	213.921	0.0821447	0.00299796
108.774	5.64033	70912.4	173608	10969.1	105228	5838.94	1173.02	50455.9	631.243	191.587	195.945	0.0823402	0.0027632
108.839	5.64981	73096.6	178671	11842.1	94431.5	5973.07	1242.64	51883.7	567.706	196.658	231.161	0.0817148	0.0031624
108.904	5.65929	79653.4	193966	14621.3	74225.2	6680.91	963.515	57630.4	457.348	210.833	264.026	0.0838747	0.00331468
108.969	5.66877	81213.4	199205	15492.9	70908.1	6861.38	904.241	59197.9	410.328	214.246	237.176	0.0844858	0.00292041
109.033	5.67825	83794.5	203102	16158.9	64799.2	7242.43	859.978	61390.5	381.064	219.637	244.291	0.0864308	0.00291535
109.098	5.68774	65308.4	164763	9989.02	123404	5224.93	1148.55	45166.5	713.383	183.424	199.145	0.080004	0.0030493
109.163	5.69722	64630.8	166620	10280.5	123482	5134.02	1202.23	42146	685.304	186.615	232.14	0.079436	0.00359178
109.228	5.7067	64456.4	167786	10612.5	121676	5031.62	1128.99	41862.1	673.432	188.72	230.796	0.0780624	0.00358066
109.293	5.71618	64897.2	167068	10215.1	123326	5193.88	1145.83	42222.4	674.869	190.134	182.929	0.0800324	0.00281875
109.358	5.72566	65035.7	167025	10264.3	124272	5112.47	1277.38	43746	670.242	184.044	192.76	0.0786102	0.00296391
109.423	5.73514	65705.2	168440	10380.5	121534	5227.93	1212.95	43591.1	648.212	187.454	200.735	0.0795664	0.00305508
109.488	5.74462	78616.8	179101	12604.7	70973.1	6416.81	1711.17	59798.3	669.975	202.252	265.99	0.0816213	0.00338337
109.553	5.7541	78341.9	177099	12139.6	71954.8	6496.57	1895.56	59426.1	728.139	203.546	201.931	0.0829259	0.00257756
109.618	5.76358	78647.1	178372	12365.6	70736.1	6490.86	1690.17	59347.6	664.753	204.725	249.789	0.0825315	0.00317608
109.683	5.77307	78916.6	179808	12632.8	69715.2	6499.48	1654.74	58547.2	640.817	205.602	300.854	0.0823588	0.0038123
109.748	5.78255	78680.8	178937	12291.8	72404.6	6570.32	1795.1	59173.8	673.949	203.593	225.152	0.083506	0.00286159
109.812	5.79203	77353.9	176920	11882.7	74121.9	6514.95	1602.67	55599.2	671.305	209.366	232.565	0.0842226	0.0030065
109.877	5.80151	72615.7	160762	9472.21	87330.6	5877.61	1659.01	56067.8	728.985	191.369	276.86	0.0809412	0.00381267
109.942	5.81099	74388.9	169094	10662.5	80057.4	6284.78	1714.17	51229.7	773.393	208.062	259.432	0.0844855	0.0034875
110.007	5.82047	71761.3	162508	9530.76	87014.6	6136.55	1932.02	47820.3	825.665	205.405	260.428	0.0855133	0.00362909
110.072	5.82995	71308.8	160278	9126.87	87593.2	6211.71	1732.67	46027.9	837.263	210.313	272.604	0.08711	0.00382286
110.136	5.83943	68853.9	155790	8695.11	95082.8	5937.95	1610.91	44457.5	948.766	205.127	274.352	0.0862399	0.00398455
110.201	5.84892	69463.5	156631	8709.44	89758.1	6064.23	1651.84	43077.5	911.759	215.666	239.372	0.087301	0.00344601
110.266	5.8584	68621.6	154697	8559.23	95257	5826.15	1826.03	45145.4	939.655	202.156	255.057	0.0849026	0.00371686
110.331	5.86788	67790.6	151637	8383.73	91667.7	5621.94	1613.29	44733.7	932.203	206.742	268.1	0.0829309	0.00395483
110.396	5.87736	69752.8	158207	9025.31	91259.2	5833.31	2227.22	46372.8	874.12	200.776	255.696	0.0836282	0.00366575
110.46	5.88684	71350.9	162906	9798.86	85434.9	5867.55	2266.53	48507.3	812.305	202.492	245.585	0.0822351	0.00344193
110.525	5.89632	69102.9	156874	8952.77	92617.9	5635.25	2531.04	47154.8	875.669	194.671	267.149	0.0815486	0.00386596
110.59	5.9058	67936.5	153496	8385.09	93384.2	5559.67	2693.02	44927	828.607	197.075	284.494	0.0818362	0.00418764
110.655	5.91528	68464.4	157413	9158.29	90670	5415.09	2521.96	47060.1	769.341	194.782	297.094	0.0790936	0.0043394
110.72	5.92476	66098.3	159558	9422.5	108748	5023.71	2153.87	46718.1	690.369	178.884	337.832	0.0760037	0.00511105
110.785	5.93425	66976.3	163783	10258.6	106554	5014.57	1880.74	48060	677.098	177.23	423.969	0.0748709	0.00633013
110.844	5.94287	67683	164889	10348	106694	5110.35	2159.02	49885.2	708.713	174.732	332.536	0.0755042	0.00491314
110.902	5.95123	74669.4	182427	12717.9	85331	5920.96	1699.04	54728.1	524.217	194.557	249.166	0.0792956	0.00333692
110.959	5.9596	83764.9	199441	15896.7	61912.1	7000.25	1438.76	62666.5	431.426	211.009	281.709	0.0835702	0.00336309
111.016	5.96796	87421.8	207508	17224.9	55241.1	7524.56	1449.36	65777.3	375.421	218.417	224.078	0.0860719	0.00256319
111.073	5.97632	87390.7	209003	17583.3	54095.4	7589.99	1455.3	64124.3	378.275	223.161	212.584	0.0868513	0.00243257
111.13	5.98469	86996.1	205833	16552.8	56038.1	7601.7	1259.02	63812.2	359.939	225.066	208.952	0.0873798	0.00240185
111.188	5.99305	82082.1	194729	14537.6	67117	7027.57	1464.33	59982.5	449.345	211.324	249.58	0.0856164	0.00304061
111.245	6.00141	75216.8	186173	13243.7	84287	6076.78	1748.08	54184.1	522.605	198.401	198.506	0.0807901	0.00263911
111.302	6.00978	76685.5	188429	13642.3	81331	6211.58	1628.57	55024.4	512.147	199.08	251.464	0.0810008	0.00327915
111.359	6.01814	78373.7	190379	14099.4	73099.4	6515.24	1396.36	54595	518.399	213.261	226.992	0.0831304	0.00289627
111.421	6.0272	93602.2	221156	20809.2	44072	8206.96	987.887	70714.1	331.13	233.841	214.634	0.0876792	0.00229304
111.5	6.03869	96827.1	229678	23227.4	39058.6	8530.26	806.998	73892.2	279.634	238.488	245.873	0.0880978	0.0025393
111.579	6.05019	97644.4	230459	23453.7	37773.3	8616.89	849.001	75120.3	274.908	239.209	229.355	0.0882476	0.00234888
111.657	6.06168	97345.8	230249	23740.5	37678.4	8501	774.883	74683.2	272.223	237.802	300.065	0.0873279	0.00308247
111.736	6.07317	101604	242117	27151.4	31486.9	8990.04	775.564	79049.6	213.265	245.461	233.716	0.0884816	0.00230028
111.815	6.08467	101375	239543	26160.3	32150.3	9064.22	735.786	77808.6	216.871	246.314	276.441	0.0894132	0.00272693
111.893	6.09616	100540	238752	26152.6	33031.8	8881.34	740.408	77124	222.571	242.584	324.392	0.0883366	0.0032265
111.972	6.10766	97946.7	231456	23570.3	37702.1	8791.97	793.72	74426	271.278	240.811	250.505	0.0897628	0.00255757
112.051	6.11915	95638.8	226938	21926.6	41567.5	8609.46	819.795	70375.5	287.71	240.152	262.361	0.0900206	0.00274325
112.129	6.13065	96777.8	228332	21938.3	40360	8821.59	820.323	70690.2	274.707	244.546	231.311	0.091153	0.00239012
112.208	6.14214	81383	199290	14946.8	71228.9	7088.12	984.448	55089.9	420.812	224.217	195.623	0.0870959	0.00240374
112.263	6.15019	71211.5	180489	12170.7	99897.7	5875.39	1413.54	46852.7	640.293	199.869	184.882	0.0825062	0.00259624
112.318	6.15815	70441.9	176399	11757.6	100766	5675.64	1373.19	47240.4	667.371	195.669	235.578	0.0805719	0.00334429
112.372	6.1661	71747.3	174319	11284.4	97391.4	5921.06	1461.12	49756.8	701.402	196.025	204.776	0.0825266	0.00285412
112.426	6.17406	85760.1	198691	15539.9	58605.9	7454.81	1200.57	62502.4	470.47	222.663	240.201	0.0869264	0.00280085
112.481	6.18201	77018.6	181672	12242.5	80149.8	6555.22	1302.58	53830.1	596.982	211.191	194.674	0.0851122	0.00252762
112.535	6.18997	81319.4	189565	13758.6	69751.3	6939.97	1152.53	59676.5	529.677	213.938	218.261	0.0853421	0.002684
112.59	6.19792	81224.1	189833	13960.5	69437.6	6911.72	1184.7	59595.6	550.595	212.856	230.05	0.0850945	0.00283228
112.644	6.20588	82459.7	191968	14606.3	64819	6943.36	1169.72	61072.4	533.028	214.852	254.981	0.0842031	0.00309219
112.7	6.21401	62152.1	154583	8311.05	133647	5085.15	1560.69	39948.4	794.728	184.765	154.907	0.0818179	0.00249238
112.761	6.22301	60310.2	151151	8026.99	138720	4814.23	1939.21	38467.4	856.712	179.911	149.758	0.0798245	0.00248313
112.823	6.23201	67968.4	163506	9616.63	109447	5617.94	1508.85	46103.4	801.688	192.691	177.94	0.0826551	0.00261798
112.884	6.241	66875.5	161495	9442.03	114457	5438.66	1499.7	46441.5	801.856	185.677	205.641	0.0813252	0.00307499
112.946	6.25	62406.9	154414	8578.88	128440	5014.69	1744.44	40266	889.622	182.691	203.594	0.0803548	0.00326236
113.014	6.26	64710.2	158865	9011.13	120888	5307.98	1623.81	42470.5	847.174	188.996	158.448	0.082027	0.00244858
113.083	6.27	69779.7	164658	9938.08	102419	5767.87	1439.82	49365.7	842.932	193.583	177.399	0.0826583	0.00254227
113.151	6.28	78414.8	183966	13176	76359	6465.83	1377.47	59642.5	626.022	201.869	207.384	0.0824567	0.0026447
113.22	6.29	79951.4	187108	13564.2	73006.5	6724.18	1327.57	60453	598.497	206.99	183.666	0.0841033	0.00229722
113.288	6.3	77144.3	181762	12629.1	80543.3	6387.78	1192.53	57939.5	606.496	202.925	201.651	0.082803	0.00261395
113.357	6.31	79710.4	189360	13834.3	73607.2	6594.61	1098.33	60833.6	482.545	207.458	202.904	0.0827322	0.00254552
113.425	6.32	83662	194851	15413.1	62273.5	6863.08	1172.13	67755	481.682	208.816	199.318	0.0820334	0.00238241
113.494	6.33	80703.5	187808	14088.3	69235.6	6535.01	1282.68	64348.9	540.788	201.795	243.113	0.0809756	0.00301242
113.562	6.34	78574.3	184327	13223.2	76037.5	6416.57	1228.59	61041.9	572.189	201.664	208.9	0.0816624	0.00265862
113.63	6.35	83793	195919	15200.4	64338.2	7132.22	1115.42	64361.3	510.671	214.151	185.369	0.0851171	0.00221223
113.699	6.36	84757.1	196715	15581.3	61200	7187.65	1083.74	65653.3	502.354	214.269	227.446	0.084803	0.0026835
113.767	6.37	85137.3	197989	15370.6	61467.5	7542.15	966.447	61902.9	495.752	223.022	241.229	0.088588	0.00283341
113.836	6.38	85652.8	199620	15816.7	60038.9	7388.88	1027.77	65873.4	461.615	219.975	176.199	0.0862655	0.00205713
113.904	6.39	83410.4	194101	14674.5	65933.4	7295.48	914.185	61007.9	523.195	218.589	252.948	0.0874649	0.00303257
113.973	6.4	85793.4	201288	16565.7	58616.7	7320.44	925.442	65014.4	463.016	219.016	271.027	0.0853264	0.00315906
114.041	6.41	83485.7	195182	15007	65140.5	7193.3	997.562	61964.5	514.219	216.215	245.545	0.086162	0.00294116
114.109	6.42	68283.3	168879	10517.5	107070	5572.4	1244.5	45395.4	719.793	197.129	196.25	0.0816071	0.00287405
114.178	6.43	68662.1	165989	10347.3	105799	5450.04	1408.91	49547.2	782.317	187.961	195.05	0.0793748	0.00284073
114.246	6.44	73236.5	172864	11358.5	90196.3	5881.7	1240.78	54776.9	701.472	197.469	180.971	0.0803111	0.00247105
114.315	6.45	78568.7	180935	13031.8	74466.2	6227.01	1170.04	64049.6	615.352	198.481	212.223	0.0792556	0.00270112
114.383	6.46	78328.8	181018	12943.8	75368.5	6270.42	1180.35	62584.1	613.818	199.307	224.396	0.0800525	0.00286479
114.452	6.47	77047.8	179337	12345.5	80051.2	6278.82	1282.71	59517.9	630.53	200.088	191.903	0.0814925	0.0024907
114.52	6.48	73496.3	174169	11300.4	90647.3	6003.77	1386.15	53454.5	663.087	197.869	195.633	0.0816881	0.00266181
114.588	6.49	74161.3	176087	11611.1	87426.3	6093.92	1298.27	53081.4	643.183	202.762	198.978	0.0821712	0.00268304
114.657	6.5	73049.3	172894	11119	90911.7	5999.45	1280.81	51554.9	680.59	201.01	221.129	0.0821287	0.00302712
114.725	6.51	72894.4	173351	11181.6	91800.7	6016.83	1293.33	50932.3	703.767	201.806	204.166	0.0825417	0.00280084
114.794	6.52	73997.9	175606	11408.8	90540.2	6271.85	1178.49	50988.7	710.258	204.903	209.599	0.0847571	0.00283249
114.862	6.53	72218.5	169353	10565.6	94958.3	5938.32	1224.82	51716.2	721.867	197.701	215.919	0.0822272	0.0029898
114.931	6.54	71320.1	168405	10523.5	96247.2	5812.33	1176.71	50301.1	726.351	198.066	236.165	0.0814964	0.00331134
114.999	6.55	68926.7	164924	9883.26	105216	5681.49	1274.92	47043.8	770.933	196.062	200.172	0.082428	0.00290413
115.067	6.56	65373.9	158381	9052.99	116784	5365.13	1213.2	42495.6	848.034	193.498	218.883	0.0820683	0.00334817
115.136	6.57	61114.1	153171	8397.5	134651	5032.91	1516.28	36936.4	959.526	186.275	215.422	0.0823526	0.00352492
115.204	6.58	65117.2	157527	8925.29	117660	5426.6	1500.22	41626.7	960.997	193.027	186.014	0.0833358	0.0028566
115.272	6.59	72257.1	168558	10544	93377.9	6145.89	1312.6	49616.1	880.679	202.332	208.155	0.0850559	0.00288076
115.341	6.6	69657.5	164367	9798.38	102938	5918.87	1303.4	46970.8	895.612	200.032	171.324	0.084971	0.00245951
115.409	6.61	73034.5	171310	11169.2	90248.6	6109.28	1247.65	52058.1	841.301	200.828	208.351	0.0836492	0.00285278
115.478	6.62	70907.2	168254	10582.4	98144.6	5892.24	1241.67	49809	853.817	199.027	170.725	0.0830978	0.00240773
115.546	6.63	74241	171511	11294.2	88317.1	6169.97	1245.72	55354.4	862.994	196.487	221.163	0.0831072	0.00297899
115.615	6.64	74639.2	172278	11527.6	86493.8	6142.69	1423.15	56639.4	876.88	193.835	220.555	0.0822985	0.00295495
115.683	6.65	75270.8	174208	11508.8	85203.1	6335.93	1224.67	55215.2	787.948	202.567	193.01	0.0841751	0.00256421
115.752	6.66	66226	162824	9602.31	118428	5416.29	1347.61	44144.1	804.129	187.643	214.217	0.081785	0.00323464
115.82	6.67	64293.9	159716	9074.09	127203	5266.8	1394.83	42073.1	800.027	185.189	190.508	0.0819175	0.00296308
115.889	6.68	67214.1	166242	9887.34	114751	5556.89	1403.74	44674.3	727.848	192.342	167.798	0.0826745	0.00249647
115.957	6.69	72168.5	170929	10906.3	95313.9	5897.76	1380.31	52794	721.547	192.931	216.472	0.081722	0.00299953
116.025	6.7	73584.7	173342	11111	93609.5	6134.46	1387.67	54529.2	721.463	194.259	179.084	0.0833659	0.00243371
116.094	6.71	69673.5	168337	10477.1	104800	5701.16	1271.24	49192.7	746.286	191.311	212.613	0.0818267	0.00305156
116.162	6.72	75781.2	180750	12348.9	86403.9	6335.8	1202.86	55876.4	650.002	201.394	173.481	0.0836065	0.00228923
116.231	6.73	73548.9	177864	11969.2	92150.8	6039.56	1069.05	53608.3	628.93	198.622	206.456	0.0821163	0.00280706
116.299	6.74	74061.8	175644	11943.6	88568.3	6020.45	1205.47	55139.9	737.706	196.674	215.595	0.0812895	0.00291101
116.367	6.75	78831.8	183039	13517.8	73450.4	6450.32	1239.24	62701.5	718.027	202.67	168.097	0.0818239	0.00213236
116.436	6.76	78666.9	180699	13294.6	71641.5	6339.57	1169.38	62548.9	685.416	201.154	264.928	0.0805876	0.00336772
116.559	6.77795	77942.7	179895	13145.6	74399.5	6305.41	1271.05	61929.1	748.846	199.12	223.049	0.0808981	0.00286171
116.625	6.78758	78282.3	180857	13223.6	74294	6399.02	1218.22	61154.3	743.536	200.796	238.197	0.0817428	0.00304279
116.691	6.79721	79890.8	185814	14018.7	70344.5	6611.15	1087.18	61548.9	674.732	207.336	228.091	0.0827524	0.00285503
116.757	6.80685	81153.1	190278	14699.7	68033.7	6767.74	1017.98	61600.3	609.441	210.948	238.76	0.0833947	0.00294209
116.823	6.81648	75414	179116	12169.1	86267.4	6326.4	1085.56	54724.5	662.677	202.815	215.613	0.083889	0.00285906
116.886	6.82573	65429.9	164753	9769.32	117660	5418.04	1382.44	40994.6	753.722	196.122	178.162	0.0828068	0.00272295
116.949	6.83499	67993.8	169300	10767.2	107735	5407.75	1286.61	46378.9	691.264	190.812	248.185	0.079533	0.00365011
117.012	6.84423	77940.1	187762	13827.1	76880.5	6411.16	1168.26	57784.9	561.296	206.411	202.714	0.0822575	0.00260089
117.076	6.85349	81729.4	195083	15497.5	67166.9	6692.31	1085.1	63656.5	510.185	208.271	214.395	0.0818837	0.00262322
117.139	6.86274	88564.4	207348	18490.9	51471.9	7312.71	1049.13	71301	414.514	214.91	290.183	0.0825694	0.00327653
117.202	6.87199	85727.8	200663	16481.5	58324.6	7158.99	990.731	67281.1	436.55	215.741	241.812	0.0835083	0.00282069
117.266	6.88124	84163.9	198027	15601.8	62971.4	7181.46	1056.46	63694.3	475.559	215.987	219.813	0.0853272	0.00261172
117.329	6.89049	81277.6	192684	14280	70038.3	6863.38	950.691	60090.5	450.1	214.484	237.907	0.0844438	0.0029271
117.366	6.89593	60189.5	152687	8435.45	144488	4776.71	1345.02	39107.5	889.343	175.943	196.614	0.0793612	0.00326659
117.403	6.90135	63786	159488	9229.71	128791	5105.2	1273.04	42875.4	800.835	182.643	188.344	0.0800363	0.00295274
117.441	6.90678	71004.8	173259	11323	100303	5733.16	1236.75	50917.4	703.196	192.766	201.064	0.0807433	0.00283169
117.478	6.91221	76844.1	183589	12971.9	80835.1	6370.26	1192.9	56052.5	609.245	204.996	208.392	0.0828984	0.00271189
117.515	6.91764	74729.3	182278	12840.3	86018.1	6124.93	1122.4	53432.1	607.177	203.234	221.922	0.0819615	0.00296968
117.552	6.92307	77348.2	185510	13684.5	78464.2	6279.81	1159.18	58333	607.378	201.369	238.151	0.0811889	0.00307895
117.589	6.9285	71322.4	173935	11271.2	101391	5865.94	1125.79	51593.4	679.394	193.531	182.35	0.0822454	0.0025567
117.653	6.93783	65046.5	163881	10272.4	121390	5028.69	1287.92	45958.4	819.412	179.609	212.118	0.0773091	0.00326102
117.717	6.94718	67176.3	168569	10987.5	110179	5244.88	1237.79	46560.8	778.171	187.871	232.468	0.0780764	0.00346056
117.781	6.95653	76885.6	187380	13855.5	81799.1	6239.69	1076.53	57769.8	586.361	201.888	190.397	0.0811555	0.00247637
117.845	6.96588	85365.2	204542	17818.2	57981.8	6930.39	975.255	67506.4	437.228	212.729	258.866	0.0811851	0.00303245
117.909	6.97522	89240.9	213327	19776.6	50950.4	7297.49	919.794	72171.8	364.405	216.537	257.24	0.0817729	0.00288253
117.973	6.98457	98637.8	237311	26881.7	34173.6	8218.48	857.507	81788	231.804	228.323	287.674	0.0833198	0.00291647
118.037	6.99392	96991	233754	25380.8	36839	8142.3	842.283	77803.5	247.386	230.041	299.68	0.083949	0.00308977
118.101	7.00327	97648.3	233713	25239.3	36108.4	8275.72	887.751	78406.6	251.616	232.004	260.656	0.0847503	0.00266933
118.165	7.01262	101030	245214	29063.2	31320.3	8637.61	660.009	81201.3	197.18	238.197	309.056	0.0854957	0.00305906
118.229	7.02197	97937.5	235406	25890.5	35563.4	8331.55	791.199	77789.4	252.078	234.967	270.388	0.0850701	0.00276082
118.293	7.03131	95163.3	228486	24037.7	39487.1	7997.26	847.032	75489.8	292.284	229.012	296.934	0.0840372	0.00312026
118.357	7.04066	94352.1	223027	22191	41586.9	7959.74	1011.76	75524	314.281	224.99	274.038	0.0843621	0.00290442
118.421	7.05001	91537.2	217639	21014	45670.7	7554.61	993.964	73524.5	340.482	219.944	297.667	0.0825305	0.00325186
118.485	7.05936	88725.4	210678	18087.3	54302.4	7654.29	951.328	68083.3	371.898	223.212	203.266	0.0862695	0.00229095
118.549	7.06871	76949.3	189689	14126	80768.6	6365.62	1051.6	54528.6	565.831	207.637	224.99	0.0827249	0.00292387
118.613	7.07805	86115.7	201429	16662.1	57404.3	7329.69	1028.23	65036.2	478.213	219.442	260.085	0.0851144	0.00302018
118.677	7.0874	89477.2	211466	17825.1	52893.5	7955.7	869.973	64606.2	352.006	232.547	245.783	0.0889131	0.00274687
118.74	7.09675	93333.1	221292	20714.2	44083	8245.83	936.672	68941	324.797	238.109	215.459	0.0883484	0.0023085
118.804	7.1061	89250.9	213214	19260.9	51549	7464.91	973.698	69269.8	361.752	220.379	262.728	0.0836396	0.0029437
118.868	7.11545	91864.7	220050	20712.4	47319.9	7830.14	951.115	71397.3	324.055	225.16	235.9	0.0852356	0.00256791
118.932	7.12479	88131.8	212275	18550.9	54148.4	7520.83	864.384	66251.5	354.609	227.033	207.659	0.0853362	0.00235623
118.996	7.13414	91924.8	221351	21574.7	46313.7	7658.04	799.422	73803.8	304.083	222.679	272.488	0.0833076	0.00296425
119.06	7.14349	90724.7	219620	20613	48759.7	7621.6	881.897	71019	303.69	224.32	232.582	0.084008	0.0025636
119.124	7.15284	91999.5	220173	21364.2	45639.6	7585.25	865.441	74028.8	300.98	221.378	301.071	0.0824488	0.00327252
119.188	7.16219	94979.8	227508	22437	42318.8	8170.87	858.771	75163.4	267.075	230.886	205.675	0.0860274	0.00216546
119.252	7.17153	92490.6	219553	20517.7	45494.2	7935.55	974.855	70469.3	315.028	229.155	264.123	0.0857984	0.00285567
119.316	7.18088	91211.9	212905	18413	48996.4	8124.41	977.693	66959.1	373.719	234.742	206.391	0.0890719	0.00226277
119.377	7.18976	74568	183355	12779.5	88222.9	6224.88	1077.47	50886.1	615.291	207.476	210.239	0.0834793	0.00281942
119.433	7.19793	90032.5	211977	18749.2	50278.2	7715.61	1025.98	68629.9	384.355	225.883	224.452	0.0856981	0.00249301
119.489	7.20609	91159	215713	19586.3	48486.9	7822.16	1013.95	69367.3	355.843	226.133	249.77	0.0858079	0.00273994
119.545	7.21425	86080.7	205155	17120.3	58471.8	7375.29	952.986	63662.7	440.581	223.261	218.968	0.0856788	0.00254375
119.6	7.22242	90227.7	214648	19416.5	49408.6	7721.53	945.273	68213.4	364.347	228.696	224.049	0.0855782	0.00248315
119.656	7.23058	98810	235803	25601.7	35574	8498.24	759.543	78692.3	243.23	234.972	274.232	0.0860059	0.00277535
119.712	7.23874	99378.9	234492	24758.2	34661.5	8710.9	883.169	77235.6	244.533	240.413	240.46	0.0876534	0.00241963
119.768	7.24691	97511.3	230507	23745.7	36723.8	8492.21	849.792	74606.6	260.977	239.611	278.237	0.0870895	0.00285339
119.824	7.25507	97263.7	228078	22443.3	37587.3	8666.71	957.19	71694.7	268.308	243.471	268.264	0.0891053	0.00275811
119.88	7.26323	85459.4	200369	15708.9	59807.5	7403.29	1063.58	62219.6	429.149	224.038	225.224	0.0866293	0.00263545
119.989	7.27917	67451.9	169277	10417.8	114131	5559.91	1159.15	44516.8	709.544	195.611	163.899	0.0824278	0.00242986
120.134	7.30039	77088.1	186733	13375.2	81058	6374.63	1034.32	55648.1	542.199	207.894	204.808	0.0826928	0.0026568
120.279	7.32162	77485.8	189273	13982.7	79579.3	6344.05	1027.06	56493.7	520.449	206.038	231.732	0.0818738	0.00299064
120.425	7.34285	83679.1	198736	15702.9	64471.1	7020.94	989.835	63625.5	446.434	214.934	215.976	0.0839032	0.00258101
120.57	7.36407	90199.1	213238	18873.1	51052	7693.72	915.365	70024.9	352.126	224.311	221.915	0.0852971	0.00246028
120.715	7.38529	82119	197992	15667.3	67344.9	6759.91	1016	61460.7	451.888	212.816	229.114	0.0823184	0.00279003
120.86	7.40652	92667	220053	20590.2	45699.7	7954.09	898.538	71361.5	320.201	231.774	201.211	0.0858352	0.00217134
121.006	7.42775	97100.2	227923	23386.7	36480	8350.32	950.457	75615.8	281.28	238.471	236.99	0.0859969	0.00244067
121.151	7.44897	93485.9	215773	20310.5	41202	7865.85	1087.65	73148	326.713	230.247	291.22	0.0841394	0.00311513
121.296	7.47019	82767.9	194805	15028.9	64743.1	6701.61	1201.32	66264	411.884	207.531	212.255	0.0809687	0.00256446
121.375	7.4818	63036.4	156457	8826.26	125462	4856.55	2628.91	42978.7	785.635	174.574	190.107	0.0770435	0.00301582
121.438	7.49092	60478.2	152336	8876.26	132690	4301.39	1907.7	43157.2	727.426	162.448	456.293	0.0711231	0.00754476
121.501	7.50003	58727.3	146201	8532.89	138865	3892.94	1269.38	45800	683.374	151.163	904.661	0.0662883	0.0154044
121.709	7.50915	59300.4	137141	8200.49	126125	3317.55	1164.02	66635.7	565.645	127.89	1400.52	0.0559448	0.0236173
121.916	7.51827	73208.9	165245	11747.5	82563.5	4626.82	946.272	80197.9	379.258	153.026	1194.13	0.0632002	0.0163113
122.122	7.52739	61734.3	139078	8151.82	119874	3672.12	1220.76	67021.5	592.618	131.763	1590.9	0.0594826	0.0257701
122.328	7.53651	96974.6	227356	23752.4	35965.4	8020.13	1025.9	79014.9	251.129	226.621	368.033	0.0827034	0.00379514
122.575	7.54743	65118.6	148793	8887.33	107581	4328.38	1179.01	59522.3	566.961	153.416	1268.75	0.0664692	0.0194837
122.824	7.55836	51983.4	124379	6884.33	161258	2835.8	1596.03	54559.4	771.33	113.066	2227.2	0.054552	0.0428444
123.071	7.56929	52244.1	124755	6836.73	159026	2888.9	1594.14	53128.7	774.857	116.543	2029.26	0.0552963	0.038842
123.318	7.58022	52745.8	123895	6707.05	157209	2898.52	1485.87	56336.6	747.301	115.471	1866.06	0.0549527	0.0353784
123.568	7.59116	60727.6	141724	8558.02	121644	3610.5	1325.18	61838.3	589.919	135.083	1490.59	0.059454	0.0245455
123.815	7.60209	55384.6	132341	7751.91	141739	3065.63	1458.11	57469.4	663.895	122.665	1910.75	0.0553518	0.0344997
124.311	7.62396	54679.7	129872	7336.63	147372	3087.98	1500.97	54636.4	738.625	122.983	1852.71	0.056474	0.0338829
124.558	7.63489	51517.6	123967	6443.7	170877	3044.85	1629.32	47880.7	854.002	119.539	1589.82	0.0591032	0.0308598
124.805	7.64582	54562.6	129713	7205.25	149000	3142.41	1497.86	53575.8	729.399	124.222	1734.83	0.0575928	0.0317952
125.054	7.65675	55860.7	132169	7666.02	138421	3146.53	1454.86	57806.9	664.406	124.344	1933.2	0.0563281	0.0346075
125.301	7.66769	54473	130170	7309.89	147879	3104.18	1598.13	53037.3	737.515	124.644	1696.59	0.0569857	0.0311456
125.548	7.67862	56374.7	132033	7921	132314	3032.09	1379.35	63640.4	655.881	122.196	1666.02	0.0537845	0.0295526
125.798	7.68955	58520.6	139916	8326.64	133832	3529.75	1541.33	55159.5	676.906	131.418	1952.35	0.0603164	0.0333618
126.045	7.70048	59981.4	143733	8989.18	118925	3614.73	1269.93	55527.1	610.293	141.555	1974.9	0.0602642	0.0329253
126.292	7.71142	60163.8	145293	9106.44	119404	3726.16	1259.72	52551.3	639.233	145.139	2097.26	0.0619336	0.0348591
126.541	7.72235	61815.1	150114	9602.56	112030	4026.38	1406.09	50394.2	689.162	156.013	1455.45	0.0651358	0.0235451
126.788	7.73328	51282.2	121051	6415.23	154305	2965.39	1300.82	46538.2	975.237	128.619	1772.06	0.0578249	0.0345551
127.035	7.74421	59702.4	145761	9072.77	125476	3697.82	1502.95	52306.1	688.389	143.264	1336.19	0.0619374	0.0223808
127.283	7.75515	58041.9	143093	8627.4	134675	3628.79	1537.11	49629.9	743.606	142.743	1021.48	0.0625202	0.0175991
127.531	7.76608	62476.2	155396	10542.2	108829	3982.16	1331.88	51555.7	668.225	160.77	883.589	0.0637388	0.0141428
127.779	7.77701	62219.9	155843	10222.3	118691	4147	1352.1	49182.7	728.49	159.404	777.618	0.0666508	0.0124979
128.026	7.78794	64375.7	159656	10645.7	105001	4252.43	2205.51	52112.6	651.149	163.379	517.408	0.0660564	0.00803732
128.223	7.79659	70467.2	170310	11358	89171.1	5191.02	3520.78	53291.9	621.946	177.267	340.524	0.0736657	0.00483237
128.348	7.80171	89827.9	216920	19508	49567	7887.62	1331.49	65449.8	355.85	228.11	215.246	0.0878082	0.00239621
128.493	7.80683	95136.5	225849	21481.2	40741.5	8557.72	1265.84	68694.1	290.555	239.159	235.388	0.089952	0.00247422
128.637	7.81196	94744.2	227358	21683.5	41368.1	8608.45	1245.3	67399.2	292.893	242.442	195.261	0.0908599	0.00206092
128.781	7.81708	93143.1	221731	20567.9	43957.1	8266.09	1224.86	67261.3	308.774	234.174	274.839	0.0887462	0.00295071
128.926	7.8222	91037.3	216350	19022.1	47805.8	8208.22	1401.81	63864.7	361.979	234.297	230.175	0.0901633	0.00252836
129.07	7.82732	89702.8	215701	18899.6	50065.8	7981.89	1328.28	63439.1	354.861	232.053	218.14	0.0889814	0.00243181
129.215	7.83245	89228.3	213154	18207.2	51823.5	7955.45	1328.19	63258.1	368.594	230.079	220.228	0.0891584	0.00246814
129.387	7.83856	55384.3	141164	7607.95	157912	4169.66	1861.58	35975.4	1212.82	161.91	265.705	0.0752858	0.00479747
129.677	7.84886	46157.4	123691	6121.74	210901	3284.32	2270.91	28343.5	1660.46	139.92	259.199	0.0711549	0.00561555
129.968	7.85915	48392	129224	6652.13	196878	3425.97	2487.69	31228.4	1517.99	143.235	196.335	0.0707962	0.00405717
130.258	7.86945	47255.8	127866	6481.65	197596	3446.86	2260.34	27788.5	1549.5	150.027	223.502	0.0729405	0.00472962
130.546	7.87974	48991.4	129503	6688.03	184368	3496.43	2117.95	30156.1	1491.78	152.07	257.426	0.0713683	0.00525452
131.417	7.91062	47118.1	125294	6274.15	204346	3326.9	2195.39	30053.6	1654.06	142.974	180.166	0.0706077	0.00382371
131.708	7.92092	43369.3	116210	5453.48	225933	3042.21	2242.34	26090.6	1880.74	136.862	217.114	0.0701466	0.00500617
131.998	7.93121	42813	114301	5221.45	230009	3013.15	2594.09	25481.5	1963.7	135.653	188.063	0.0703794	0.00439266
132.289	7.94151	38913.7	102894	4293.16	257602	2735.21	2676.75	22548.8	2380.31	125.117	240.524	0.0702891	0.00618095
132.579	7.9518	40197.6	107857	4678.88	248841	2841.44	2854.15	23361.3	2172.19	129.162	189.766	0.0706866	0.00472083
132.869	7.9621	39904.8	107737	4746.29	245942	2767.3	2786.27	23200.2	2137.09	129.72	206.023	0.0693475	0.00516287
133.16	7.97239	39200.1	104257	4387.48	249904	2782.95	2577.22	22289.2	2350.93	131.562	179.049	0.0709934	0.00456757
133.45	7.98268	37356.5	98213.4	3943.4	265183	2598.8	2710.63	21934.3	2519.5	122.746	201.444	0.0695675	0.00539249
133.741	7.99298	36997.3	95546.8	3635.36	266971	2683.25	2469.74	21303.2	2716.28	126.593	147.159	0.0725254	0.00397755
134.031	8.00327	37308.1	96209.7	3715.96	262435	2682.53	2307.14	21296.1	2704.52	127.602	187.419	0.0719022	0.00502354
134.322	8.01357	35120	90892.7	3375.24	270879	2525.83	2081.02	18751.7	3106.8	129.624	175.241	0.0719202	0.00498977
134.903	8.03416	36392.6	92451.8	3413.41	270929	2645.22	1884.53	20626.8	2868.98	126.926	188.355	0.0726857	0.00517565
135.475	8.05451	44410.5	121515	5836.29	224430	3154.54	1956.13	26107	1447.22	139.021	281.682	0.0710314	0.00634269
135.756	8.06451	45646.4	124099	5861.26	219290	3321.51	2048.9	26918.9	1284.95	142.81	222.438	0.0727661	0.00487307
136.038	8.07451	46503.7	128362	6279.87	216758	3362.72	1989.69	27592	1149.77	143.397	226.454	0.0723109	0.00486958
136.32	8.08451	48931.7	138104	7348.33	201478	3498.2	1936.48	29226.5	968.617	148.807	230.85	0.0714915	0.0047178
136.602	8.09451	50383.2	142539	7724.26	194008	3663.12	1965.06	29904.2	893.791	152.773	219.373	0.0727051	0.00435409
136.884	8.10451	50189.4	143192	7867.68	192961	3634.97	1818.96	29191.2	881.168	154.744	241.381	0.0724251	0.00480941
137.166	8.11451	49478.4	139848	7418.57	201457	3593.05	1962.25	29446.9	917.46	149.355	222.617	0.0726186	0.00449928
137.448	8.12451	48490.5	136600	7066.79	205403	3490.28	2151	28722	943.271	147.279	223.25	0.0719785	0.00460399
137.73	8.13451	48267.5	137490	7209.53	208173	3425.77	2163.33	28930.4	890.892	144.881	228.11	0.0709747	0.00472596
138.012	8.14452	48753.3	139099	7378.9	205217	3508.37	2046.35	28830.3	910.949	147.895	217.705	0.0719616	0.00446544
138.294	8.15451	49249.4	140750	7656.4	197659	3476.25	2003.71	29152.5	860.972	149.439	271.604	0.0705846	0.00551487
138.576	8.16451	49906.1	141129	7509.16	195889	3672.06	1976.88	28806.5	885.689	152.933	260.519	0.0735794	0.00522018
138.857	8.17451	48902.6	137670	7204.54	202146	3531.54	2116.15	28747.8	937.466	147.811	269.551	0.0722157	0.005512
139.139	8.18452	49456.1	139893	7412.29	198610	3605.54	2065.81	29059.8	915.428	151.225	219.675	0.0729037	0.00444181
139.421	8.19452	50377.4	142329	7605.62	194814	3688.56	2107.53	29744.5	874.092	152.699	208.205	0.0732185	0.00413291
139.703	8.20452	48710.6	137638	7257.21	203551	3454.86	2222.3	29383.4	928.397	145.673	236.934	0.0709261	0.00486411
139.985	8.21452	49723.9	140894	7608.3	196290	3547.77	2001.36	29668.8	891.257	150.701	233.349	0.0713493	0.00469291
140.267	8.22452	50040.7	141124	7532.29	196478	3624.29	1933.36	29583.6	862.59	150.918	264.997	0.0724269	0.00529564
140.549	8.23452	50285.8	141717	7570.74	195335	3648.97	1950.11	29826.7	856.148	151.733	244.519	0.0725646	0.00486259
140.831	8.24452	50823.3	143734	7734.89	192148	3708.33	2090.89	30235.2	825.288	153.544	206.011	0.0729651	0.00405348
141.113	8.25452	53419.8	149907	8328.92	179979	3958.93	1788.31	32532.4	751.553	159.865	183.409	0.0741098	0.00343336
141.394	8.26452	51536.1	145070	8089.79	188855	3636.81	2089.04	32756.2	802.048	147.371	269.493	0.0705682	0.00522921
141.676	8.27452	53479.7	151322	8689.75	181198	3878.33	1668.67	33550.5	735.961	155.516	222.104	0.0725196	0.00415304
141.958	8.28452	54749.3	151914	8504.75	176336	4116.5	1590.09	34061.3	746.843	160.934	186.885	0.0751881	0.00341346
142.24	8.29452	54132.4	152074	8729.3	177457	3962.37	1577.36	33754.8	724.374	157.541	248.834	0.0731978	0.00459677
142.522	8.30452	53958.8	152033	8734.61	174832	3958.09	1634.88	32557.1	753.646	161.815	226.243	0.073354	0.00419289
142.804	8.31452	54463.9	152597	8748.83	172429	4012.59	1690.09	33587.7	753.338	162.847	180.721	0.0736743	0.00331818
143.086	8.32452	56233	156625	9016.04	166048	4259.79	1682.03	34416.8	699.608	166.935	177.014	0.0757525	0.00314787
143.368	8.33452	54429.9	154727	9173.57	169450	3968.21	1619.71	32801.3	731.491	164.291	226.872	0.0729049	0.00416815
143.65	8.34452	54977.4	154828	9092.12	167102	4062.06	1542.86	32833.4	731.773	166.496	240.604	0.0738859	0.00437642
143.932	8.35452	55069.9	154216	8890.48	170908	4073.66	1739.86	33959.2	729.171	162.488	194.776	0.0739725	0.00353689
144.214	8.36452	53349.6	149026	8268.82	178124	3956.06	1765.3	32012.8	775.152	160.595	219.86	0.0741534	0.00412111
144.496	8.37452	53646.9	149897	8386.54	180242	3949.04	1845.03	33255.1	770.292	156.598	209.346	0.0736118	0.0039023
144.777	8.38452	52155.7	144454	7708.8	190181	3822.61	2323.82	32688.5	841.564	149.803	191.435	0.0732923	0.00367046
145.059	8.39452	53477.2	147355	8092.99	182123	3898.55	2204.24	34095	816.459	151.18	221.626	0.0729013	0.0041443
145.341	8.40452	53234.8	146950	8127.45	180802	3850.47	2117.27	33779.9	812.587	151.542	252.711	0.07233	0.00474709
145.623	8.41452	54622.6	151183	8555.7	170397	4014.7	1947.65	33420.3	766.623	160.204	250.657	0.0734988	0.00458889
145.905	8.42452	52542.4	147155	8226.23	180278	3793.53	1819.26	31484.9	804.332	156.994	281.406	0.0721995	0.00535579
146.469	8.44452	54572.2	149473	8298.68	171103	4074.13	1814.52	33464.4	811.282	161.852	221.399	0.0746557	0.00405699
146.751	8.45452	53460.1	147234	8165.42	177317	3897.49	1958.23	33570.1	837.91	156.046	218.582	0.0729046	0.0040887
147.033	8.46452	53916	148209	8341.55	173420	3883.81	1952.86	34238.6	816.461	155.981	244.01	0.0720345	0.00452575
147.314	8.47452	56065.5	152221	8685.67	164732	4153.42	1794.56	36089.7	804.565	161.294	206.553	0.0740816	0.00368413
147.596	8.48452	53548.8	147165	8225.09	177637	3880.85	1947.58	33992.4	847.064	153.373	263.849	0.0724731	0.00492727
147.878	8.49452	55187.6	151288	8621.53	164162	4052.94	1703.76	34063.8	776.283	164.814	235.547	0.0734393	0.00426812
148.185	8.50541	53685.2	147539	8294.64	172093	3873.17	1773.06	33471.7	831.475	159.245	245.047	0.072146	0.00456452
148.532	8.5177	55319.8	151297	8622.23	165352	4031.42	1775.79	35017.7	781.315	162.595	208.029	0.0728748	0.00376049
148.878	8.52998	56306.4	153056	8869.41	159369	4135.32	1718.02	36090.6	777.969	164.245	222.683	0.0734432	0.00395485
149.224	8.54227	55283.4	150393	8480.01	163564	4087.93	1782.43	34242.3	808.067	164.931	221.926	0.073945	0.00401433
149.571	8.55456	54094.4	148518	8456.52	168822	3897.84	1982.39	34519.5	846.27	158.524	217.121	0.0720563	0.00401374
149.917	8.56684	54018.3	146490	8205.55	170998	3879.65	1871.63	34750.5	847.759	155.024	299.618	0.071821	0.0055466
150.263	8.57913	55370.6	148878	8474.78	162545	4027.87	1524.36	35654.7	823.213	161.484	296.983	0.0727438	0.00536354
150.61	8.59142	55117.8	147683	8539.37	160381	3912.79	1554.69	36572.3	860.551	159.189	314.142	0.0709896	0.00569946
150.956	8.6037	56519.5	152474	9032.41	156249	4078.17	1541.22	37069.4	800.653	161.738	320.941	0.072155	0.00567841
151.302	8.61599	61390	159432	9926.22	133271	4502.25	1386.18	43153.9	761.577	169.028	312.931	0.0733385	0.00509742
151.649	8.62827	65576.1	167465	10688	117954	5030.13	1244.97	46003.9	685.674	182.975	213.221	0.0767068	0.00325151
151.995	8.64056	70368.5	175118	11946.5	98950.3	5493.92	1095.24	51452.7	630.237	191.558	235.086	0.0780735	0.00334079
152.342	8.65285	60629.5	160130	9995.49	134981	4446.41	1162.61	41090	712.397	174.503	285.793	0.0733373	0.00471376
152.688	8.66513	63376.8	163244	10344.2	124460	4755.3	1002.23	44314.5	699.04	179.977	275.638	0.0750322	0.00434919
153.034	8.67742	73426.4	179977	12776.7	89438.1	5882.98	976.583	54220.1	635.37	198.741	225.732	0.0801208	0.00307426
153.38	8.6897	59790.4	156084	9382.44	142308	4399.56	1192.69	41063.5	773.224	169.212	285.873	0.0735831	0.00478124
153.727	8.70199	71427.3	175677	11831.8	96597.3	5730.64	1049.43	51568.2	629.92	195.578	231.747	0.0802304	0.00324452
154.073	8.71428	72415.6	176294	11504.8	93563.7	6237.88	874.821	47769.5	666.466	212.678	199.349	0.0861399	0.00275284
154.42	8.72656	71833.1	174409	11552.5	93655.1	6027.69	984.818	48637	714.411	205.034	252.425	0.0839124	0.00351405
154.766	8.73885	74263.9	183202	13396.7	84758.7	5898.07	985.26	54114	581.558	202.333	251.442	0.0794205	0.00338579
155.112	8.75113	64233.2	165872	10821.9	116534	4785.15	1018.01	43701.2	665.849	185.596	324.196	0.0744965	0.00504717
155.436	8.76264	69981.1	175851	12294.6	98071.4	5396.96	1113.36	51143.8	635.856	190.807	255.26	0.0771202	0.00364755
155.726	8.77291	55117.7	151333	9165.98	158343	3832.14	1368.51	35491.2	765.251	160.416	454.903	0.0695264	0.00825331
156.016	8.78319	53017.4	146282	8704.7	169030	3576.39	1615.16	34482	820.105	150.431	592.183	0.067457	0.0111696
156.305	8.79346	56099.5	152144	9285.56	154078	3880.41	1519.87	37289.3	749.066	156.706	575.282	0.0691702	0.0102547
156.595	8.80374	55693.2	150509	9152.18	158867	3809.64	1560.91	37761.3	807.498	152.143	580.755	0.068404	0.0104278
156.885	8.81401	56221.3	152100	9303.28	153738	3928.64	1519.02	36658.5	792.124	156.928	669.688	0.0698782	0.0119117
157.174	8.82428	55585.3	150904	9076.12	155758	3908.12	1568.35	35250.3	791.434	158.301	653.415	0.0703085	0.0117552
157.464	8.83456	52276.2	145242	8537.19	173434	3565.49	1684.67	32485.1	844.307	150.081	698.989	0.0682049	0.0133711
157.753	8.84483	52456.7	146778	8779.09	171223	3537.76	1758.38	32936.8	819.543	150.657	617.68	0.0674415	0.011775
158.043	8.85511	52897.7	149832	9342.15	167012	3517.48	1919.02	33616.3	829.89	151.075	542.946	0.0664959	0.0102641
158.332	8.86538	52023.6	148297	9282.08	170910	3398.16	2024.78	33340.1	846.197	147.095	603.654	0.0653197	0.0116035
158.622	8.87566	53410.1	152318	9616.53	164125	3585.13	1921.44	33327.6	804.692	154.335	500.74	0.0671245	0.00937539
158.91	8.88593	49281.9	140225	8537.49	187436	3066.09	2280.4	33079.2	946.366	133.51	796.777	0.0622153	0.0161677
159.201	8.8962	53342.4	148341	9238.62	161358	3531.95	1780.54	34836	865.992	152.204	573.129	0.0662128	0.0107443
159.491	8.90648	55324.1	155244	10022.1	152016	3724.65	1675.23	35737.3	757.02	159.248	495.387	0.0673241	0.00895426
159.743	8.91675	52892.8	150662	9583.42	163969	3482.25	1941.13	33662.2	824.486	151.678	568.957	0.0658361	0.0107568
159.992	8.92703	51291.9	149958	9675.54	175184	3327.59	2265.86	32076.1	898.886	145.865	539.156	0.0648756	0.0105115
160.243	8.9373	49498.4	146661	9503	181884	3163.19	2132.66	29529.9	981.527	143.829	778.312	0.0639049	0.015724
160.495	8.94758	52369.3	182848	17598.7	152624	3138.82	2853.3	27755.2	900.177	154.91	764.356	0.0599362	0.0145955
160.995	8.96812	53824.1	198257	21895	137900	3212.29	2883.05	26409.5	819.261	163.017	946	0.0596812	0.0175758
161.247	8.9784	52177.2	171916	14404.5	156143	3246.37	2349.53	28261	853.935	158.54	671.669	0.0622181	0.0128728
161.498	8.98867	53748.4	156102	10095.3	163410	3735.2	2112.39	32088.5	908.704	160.582	298.247	0.0694943	0.00554895
161.75	8.99895	58303.6	160253	10096.1	148429	4275.8	1844.38	36936.3	836.71	166.58	268.369	0.0733367	0.00460295
161.947	9.00922	57433.4	156112	9415.57	150851	4243.42	1773.79	35964.2	867.419	169.522	218.378	0.0738841	0.00380228
162.145	9.0195	57583.1	154049	9055.69	153494	4240.32	1883.19	37875.6	869.751	164.535	196.377	0.0736382	0.00341033
162.343	9.02977	57003.9	152717	8810.75	156003	4251.59	1755.76	36160	856.273	165.954	235.137	0.0745841	0.00412492
162.541	9.04004	59390.5	159684	9657.4	143653	4499.99	1642.76	37533.3	781.946	173.941	216.808	0.0757695	0.00365055
162.739	9.05032	56679.1	158579	9559.05	156020	4242.18	1870.94	33882.4	763.543	170.646	208.07	0.0748454	0.00367102
162.94	9.06079	51163.8	143144	7693.02	191047	3731.3	2392.34	30954.4	909.209	151.478	193.281	0.0729285	0.00377768
163.376	9.08343	54815.4	151111	8598.84	168122	4033.33	1826.65	34525	775.543	161.275	210.844	0.0735803	0.00384644
163.594	9.09475	54594.3	149934	8444.87	172694	3991.75	1875.6	34847.7	792.919	157.229	220.119	0.0731166	0.00403191
163.812	9.10607	56567.2	156234	9181.41	160670	4199.14	1664.1	35643.7	735.617	166.49	189.621	0.0742328	0.00335214
164.03	9.11739	57113	154150	8824.43	160674	4240.74	1672.79	37468.5	732.825	162.646	209.418	0.0742517	0.00366673
164.247	9.1287	61763.7	165149	10056.7	138450	4802.98	1405.12	39575.2	666.751	178.577	196.056	0.0777638	0.00317429
164.465	9.14002	59279.1	160261	9595.11	147240	4519.18	1529.12	37235.8	722.622	173.121	228.122	0.0762356	0.00384828
164.683	9.15134	61607.6	162508	9784.76	137004	4781.65	1460.34	39901.4	713.529	177.483	212.912	0.0776146	0.00345594
164.901	9.16266	57850.5	153495	8673.32	155702	4413.17	1653.15	37466.6	803.512	167.414	191.017	0.0762859	0.00330192
165.119	9.17398	64434.9	169566	10883.5	125587	4954.65	1204	43886.6	627.088	180.619	224.383	0.0768939	0.00348232
165.337	9.1853	65553.4	172648	11215.2	121897	5120.44	1316.08	44126.7	627.627	183.774	194.627	0.078111	0.00296899
165.555	9.19662	58930.3	160287	9476.5	153240	4520.28	1505.65	37155.5	710.306	171.275	192.063	0.0767055	0.00325916
165.773	9.20794	60686.7	161713	9706.64	142738	4646.96	1444.25	39333.6	714.958	174.953	194.707	0.076573	0.00320839
165.991	9.21926	59659.4	160013	9521.13	147551	4569.23	1508.37	37753.2	750.891	172.841	216.547	0.0765886	0.00362973
166.209	9.23058	69363.5	173922	11086.9	110040	5615.66	1213.16	48314	611.121	189.228	206.099	0.0809599	0.00297129
166.427	9.2419	68141.2	172351	10721.4	116115	5550.91	1319.46	46539.3	625.505	187.416	183.261	0.0814618	0.00268943
166.644	9.25322	71660.9	176759	11562.8	102094	5812.21	1267.54	51862.1	618.96	191.261	175.338	0.0811072	0.00244678
166.862	9.26454	66911.5	170470	10835.1	117209	5210.25	1198.97	47631.3	604.111	182.522	213.831	0.0778678	0.00319572
167.08	9.27586	60100.1	159673	9418.14	146772	4603.85	1436.5	39843.8	724.772	172.13	173.8	0.076603	0.00289184
167.298	9.28718	56951.5	152462	8638.54	162325	4283.66	1577	37121.4	810.642	163.063	207.612	0.075216	0.00364541
167.516	9.2985	72312	177920	11870.7	97616.7	5883.05	1056.78	51075.6	587.036	195.099	271.119	0.0813565	0.00374929
167.734	9.30982	67032	168353	10804.1	115452	5102.1	1440.14	49167.6	678.482	175.945	266.056	0.0761144	0.00396908
167.952	9.32114	60746.7	156616	9396.5	140231	4422.43	1497.42	43471.2	771.748	164.205	275.723	0.0728012	0.0045389
168.17	9.33246	59917.8	156199	9375.6	143009	4298.78	1604.84	43246.7	747.248	162.545	238.584	0.0717446	0.00398186
168.388	9.34378	62139.7	161330	9899.89	134602	4537.97	1627.6	44620.7	701.008	167.707	218.246	0.0730286	0.00351218
168.606	9.3551	61896	163155	10112.6	137285	4571.49	1665.59	43088.6	702.979	168.033	223.088	0.0738576	0.00360424
168.824	9.36642	56616	147463	8112.8	162090	4096.24	1815.87	39553.2	834.228	156.055	216.657	0.0723513	0.00382679
169.041	9.37774	58268.5	150931	8637.13	151464	4215.72	1657.85	40631.4	810.67	159.347	298.811	0.0723499	0.00512817
169.281	9.3902	49401.5	131588	6849.15	194105	3303.4	1875.87	33509	992.334	137.677	491.91	0.0668685	0.00995741
169.556	9.40449	48661.6	127367	6584.86	197519	3154.32	1940.09	34391.7	1088.02	129.55	795.046	0.0648217	0.0163383
169.831	9.41877	53423.7	139164	7744.73	171290	3556.67	1560.19	38360.8	883.734	141.882	701.84	0.0665747	0.0131372
170.106	9.43306	50715	131100	6888.89	184210	3307.34	1601.91	36498.4	949.068	135.492	816.748	0.0652142	0.0161046
170.381	9.44734	57207.5	147342	8457.81	152311	3984.74	1418.64	40743.1	791.893	154.808	506.244	0.0696542	0.00884925
170.656	9.46163	56462.5	144434	8137.45	153310	3904.77	1214.3	39539.6	795.297	156.297	607.562	0.0691568	0.0107604
170.946	9.47667	56997.3	144219	8081.76	153748	3971.41	1391.09	41450	840.321	152.234	552.054	0.0696772	0.00968562
171.239	9.4919	60195.9	145978	8060.99	141809	4258.11	1269.34	47011.4	762.019	154.429	517.304	0.0707375	0.00859367
171.532	9.50714	60327.8	149966	8582.14	139885	4315.15	1255.07	45114.2	741.203	159.175	484.102	0.0715284	0.00802454
172.706	9.5681	52389.7	129277	6719.9	162996	3366.31	1345.96	40727.1	906.837	142.526	711.94	0.0642552	0.0135893
172.999	9.58333	40340.5	99674.6	4126.01	234923	2389.93	1409.14	30734.7	1208.39	113.31	1219.47	0.059244	0.0302294
173.243	9.59602	42966.4	108713	4907.94	218553	2582.05	1536.22	32569.1	1120.27	119.832	927.98	0.0600945	0.0215978
173.409	9.60461	65998.8	160819	10033.6	110198	4903.96	928.679	47259.6	607.851	177.439	914.301	0.0743038	0.0138533
173.574	9.61321	71508.3	171958	11449.4	93527.8	5551.16	872.757	50967.5	545.787	190.112	799.747	0.0776295	0.011184
173.74	9.62181	74130.5	177548	12394.4	83287.4	5804.88	831.943	52745.2	499.725	198.824	764.182	0.0783063	0.0103086
173.905	9.6304	80372.4	189872	14095.5	68410.4	6598.07	752.083	57535.3	395.004	214.564	585.467	0.0820937	0.00728444
174.071	9.639	70678.1	167483	10570	95454	5508.29	909.581	50799.1	545.189	191.381	618.522	0.077935	0.00875126
174.236	9.6476	67794.2	160556	9552.37	107935	5246.18	952.676	49663.9	595.477	181.06	616.274	0.0773838	0.00909036
174.402	9.65619	49561	124878	6264.56	181957	3139.78	1452.72	38016.1	889.379	133.864	829.581	0.0633519	0.0167386
174.567	9.66479	48882.3	122644	6147.58	187668	2981.5	1426.23	40594.8	919.028	128.677	591.374	0.0609934	0.0120979
174.733	9.67339	47190.7	116716	5511.02	194056	2886.27	1491.37	38832.5	1017.38	128.304	479.297	0.0611619	0.0101566
174.899	9.68198	42451.5	109798	4883.92	231651	2707.56	1311.33	29957.9	1168.42	123.669	636.458	0.06378	0.0149926
175.064	9.69058	53815.9	136038	7260.97	167692	3627.79	1312.6	39586.1	857.87	143.731	759.544	0.0674112	0.0141137
175.175	9.69637	59343.1	144273	7924.05	140081	4217.14	1191.81	44247.7	777.829	158.445	633.803	0.0710636	0.0106803
175.286	9.70211	63917.7	151012	8593.26	120100	4638.03	1131.66	50174.8	683.269	168.12	472.725	0.0725625	0.00739584
175.396	9.70784	56545.4	133040	6644.8	153820	3957.71	1518.75	45881.5	917.342	145.414	495.927	0.0699917	0.00877041
175.506	9.71358	59430.6	140440	7360.36	140287	4276.7	1340.28	46912.6	828.019	155.914	450.347	0.0719612	0.00757769
175.617	9.71932	56353	133333	6762.29	152288	3864.1	1520.76	46374.3	884.962	145.024	493.173	0.0685695	0.00875149
175.729	9.72506	54832.7	129303	6407.77	156767	3691.24	1488.57	45368.4	907.713	142.226	553.295	0.0673182	0.0100906
175.841	9.7308	54118.9	128730	6440.54	154940	3619.32	1348.91	44161.1	892.45	145.236	554.883	0.0668772	0.010253
175.953	9.73654	56845.6	136023	7097.24	146261	3922.86	1332.4	45248	834.77	151.353	523.406	0.0690091	0.00920751
176.066	9.74228	52212	124513	6114.08	162416	3368.83	1512.41	43265.3	927.724	138.857	613.548	0.064522	0.0117511
176.178	9.74802	61590.5	146347	8181.78	125707	4358.47	1247.26	49141.6	710.749	162.415	496.09	0.0707653	0.00805465
176.29	9.75376	52274.6	127957	6263.67	171720	3545.2	1267.76	39873.2	887.79	143.094	577.595	0.0678187	0.0110492
176.402	9.7595	42632.2	107660	4703.78	229107	2671.16	1507.42	31661.7	1202.12	119.026	765.756	0.062656	0.0179619
176.515	9.76524	60514.4	145883	8129.63	132478	4345.07	1196.58	45643.6	779.498	162.473	562.852	0.0718023	0.00930114
176.628	9.77098	48220.2	117464	5343.71	187331	3173.95	1214.05	35681.1	986.716	137.583	751.531	0.0658221	0.0155854
176.739	9.77672	57628.5	134844	6725.01	146532	4187.37	1177.87	44180.6	884.632	155.77	539.607	0.0726614	0.00936354
176.853	9.78245	46438.8	114252	5270.76	201679	2882.28	1208.37	37880.7	1017.26	125.55	704.841	0.0620661	0.0151779
176.964	9.78819	46251.9	118791	5840.05	198773	2892.33	1449.26	33716.5	1083.43	130.141	848.117	0.0625342	0.0183369
177.076	9.79393	51327.9	130436	6720.87	175882	3404.2	1617.27	37554.2	926.619	139.739	672.645	0.0663226	0.0131049
177.188	9.79967	50994.1	127871	6517.75	173607	3288.4	1596.07	40091.4	916.964	138.487	484.15	0.0644859	0.00949424
177.3	9.80541	58393.1	142775	8014.37	136685	3917.1	1509.27	46876.1	730.408	152.994	544.026	0.0670815	0.00931662
177.412	9.81115	59094.7	141758	7532.21	138749	4150.65	1517.31	46924.9	745.785	156.213	387.78	0.0702372	0.00656202
177.525	9.81689	57120.7	137269	7175.86	145557	3890.93	1734.86	46587.8	805.148	149.492	378.035	0.0681177	0.00661817
177.637	9.82263	75509.3	173350	11107.8	83781.4	6133.6	1280.19	57873.9	526.43	193.562	374.701	0.0812297	0.00496231
177.825	9.83219	97641.4	221179	20216.8	38368	9020.51	1131.24	73281.9	291.919	240.291	259.578	0.0923841	0.00265849
178.012	9.84182	99437.1	225419	21078.8	36123.3	9316.82	1036.36	72905.2	266.103	246.154	289.495	0.0936956	0.00291134
178.201	9.85145	97485	215807	17939.7	40795.6	9554.87	1055.33	69758.7	308.104	248.516	235.281	0.0980138	0.00241351
178.389	9.86108	67190.9	163265	10376.4	99137.2	4942.56	1060.63	51422.6	517.719	185.18	425.898	0.07356	0.00633863
178.577	9.87071	66878.1	159127	9898.69	100094	4803.9	1103.62	54023.8	539.858	178.499	457.107	0.0718306	0.00683493
178.897	9.88711	92525.4	210852	18171	46273.2	8206.16	1133.76	71044.5	350.587	226.011	312.089	0.0886908	0.00337301
179.313	9.90837	77408.1	178633	11941	77220.2	6334.07	1078.76	60524.8	448.042	200.262	331.442	0.0818269	0.00428175
179.602	9.92315	57787.3	143992	8546.19	133671	3668.42	1365.67	48533.8	676.29	151.45	553.509	0.0634814	0.00957838
179.889	9.93781	48560.1	123368	6298.15	192258	2995.35	1506.42	39482.6	972.194	125.614	772.388	0.0616833	0.0159058
180.176	9.95248	58133.4	143610	7998.37	137960	3912.54	1969.83	45837.1	733.155	153.544	391.048	0.0673027	0.00672674
180.386	9.96323	56234.7	136685	6801.83	156519	4235.87	1746.51	38036.5	1034.68	157.789	419.798	0.0753248	0.0074651
180.595	9.9739	62580.3	144607	7507.94	128079	5122.08	1452.15	42675.4	1166.51	177.327	295.193	0.0818481	0.00471703
180.804	9.98458	61295.2	144653	7521.98	132875	5026.13	1329.07	40021	1124.46	178.608	329.593	0.0819987	0.00537714
181.014	9.99526	61018.3	144352	7517.09	133264	5032.26	1219.26	39175	1172.29	181.582	308.352	0.0824714	0.00505344
181.221	10.0059	56714.7	138148	6839.36	152063	4620.56	1261.1	34065.6	1205.01	175.976	336.489	0.0814703	0.00593301
181.43	10.0166	47132.6	122416	5683.19	210279	3398.78	1721.06	28809.8	1260.69	139.181	550.282	0.0721111	0.0116752
181.639	10.0273	45912.8	120778	5585.46	214378	3243.43	1823.1	28082	1198.18	137.191	542.055	0.0706432	0.0118062
181.848	10.038	44170	118727	5409.24	223693	3134.96	1996.69	25403.4	1272.88	138.368	430.576	0.0709748	0.00974816
182.055	10.0486	45580.2	121239	5618.64	212131	3297.36	1983.65	25931.6	1370.84	144.753	372.311	0.0723419	0.00816825
182.265	10.0593	50873.4	129168	6080.82	182207	3926.26	1859.34	29901.6	1305.11	158.426	305.696	0.077177	0.00600895
182.474	10.07	53498.2	131764	6237.72	173048	4209	1778.7	32607.3	1315.53	158.675	372.528	0.0786755	0.00696338
182.669	10.08	52568.8	131107	6227.74	173245	4119.46	1748.1	31585.5	1327.14	162.299	285.228	0.0783633	0.00542581
182.865	10.09	53844.9	130786	6088.02	170143	4288.2	1768.09	33370.9	1379.57	161.61	276.463	0.0796397	0.00513442
183.06	10.1	52719.1	130701	6142.29	175613	4167.83	1692.7	31942.3	1360.16	161.296	271.062	0.0790573	0.00514163
183.256	10.11	51270.6	130466	6176.69	182886	3980.59	1816.73	30278.9	1292.29	158.661	279.644	0.0776389	0.00545428
183.451	10.12	49543.6	127761	6096.7	189108	3649.18	2157.16	30160.2	1257.13	149.867	335.157	0.073656	0.00676489
183.647	10.13	53031.6	131106	6288.62	172121	4044.64	1873.63	33690.6	1306.64	156.993	298.855	0.0762686	0.00563542
183.843	10.14	56411.3	138960	7091.44	155849	4389.52	1625.81	36512.2	1203.36	165.064	288.257	0.0778128	0.00510992
184.038	10.15	61683.1	143601	7344.72	132408	5156.78	1332.86	39838.6	1288.3	182.418	247.05	0.0836013	0.00400515
184.234	10.16	60769.1	141981	7144.41	135905	5102.2	1326.47	38649.8	1315.71	182.515	234.948	0.0839604	0.00386624
184.429	10.17	60773.6	143240	7422.5	135930	5023.07	1311.26	39115.9	1320.14	179.627	270.263	0.0826522	0.00444704
184.625	10.18	57440.3	139698	7085.19	147675	4613.32	1475.63	35781.8	1257.85	175.23	257.062	0.0803151	0.00447529
184.82	10.19	57617.1	145790	7887.41	150976	4438.75	1539.66	36799.5	1042.38	169.006	280.614	0.0770387	0.00487033
185.016	10.2	60091.7	151773	8573.04	144405	4610.5	1369.08	41689.3	931.865	169.765	190.054	0.0767244	0.00316273
185.211	10.21	64168.6	155866	9019.37	121064	5140.57	1184.32	43383.8	948.192	186.763	215.348	0.0801104	0.00335598
185.407	10.22	69021.8	159355	9260.23	105107	5811.62	1106.26	47464	962.726	195.434	246.364	0.0841998	0.00356936
185.602	10.23	73199.8	167410	10467.4	91524.8	6311.25	937.744	50943.9	927.869	205.669	240.883	0.0862195	0.00329077
185.798	10.24	73325.5	168213	10500.5	89340.5	6322.05	986.154	49965.6	873.163	210.018	228.818	0.0862189	0.00312058
185.993	10.25	71837.8	164872	9840.23	96719.7	6231.23	1077.87	48805.8	907.495	204.279	215.524	0.0867403	0.00300014
186.189	10.26	66980.5	158884	9147.78	113634	5569.36	1197.84	45359.7	922.994	191.161	219.758	0.083149	0.00328092
186.384	10.27	66578	161164	9624.09	114527	5392.64	1295.26	45598.9	872.656	186.217	255.245	0.0809974	0.00383378
186.58	10.28	65275.5	158515	9260.05	119840	5279.72	1290.2	44443.9	925.479	185.401	213.322	0.0808837	0.00326803
186.776	10.29	61596	151770	8511.27	132766	4865.43	1390.74	41082	973.069	177.546	251.106	0.0789894	0.00407666
186.971	10.3	58889.2	151389	8466.5	143323	4513.99	1375.3	37306	845.674	176.655	246.865	0.0766523	0.00419202
187.167	10.31	63214.1	159808	9294.63	130372	5023.65	1375.32	41739.1	793.911	181.968	193.153	0.0794703	0.00305553
187.362	10.32	62577.2	159978	9448.22	131822	4901.35	1432.43	40971.4	792.065	179.403	229.183	0.0783248	0.00366241
187.558	10.33	63325.8	162495	9854.29	126903	4944.71	1402.22	41134.1	782.282	183.199	224.171	0.0780836	0.00353997
187.753	10.34	67067.3	169103	10780.2	112866	5316.16	1313.97	44913.2	722.07	187.447	271.764	0.079266	0.00405211
187.949	10.35	73722.6	177220	11325.3	93469.5	6342.41	1113.57	49769.3	623.75	206.406	202.843	0.0860308	0.00275144
188.144	10.36	79092.3	190387	13918.1	75825.7	6691.82	1055.68	55762.8	537.235	213.446	219.648	0.0846078	0.00277711
188.34	10.37	80946.5	194846	14800.3	71609.5	6758.09	941.94	58830	459.546	212.269	273.416	0.0834883	0.00337773
188.535	10.38	82806.2	197982	15104.1	67462.4	7161.93	849.464	58955	438.231	222.151	232.528	0.0864902	0.0028081
188.731	10.39	86088.7	205567	16385.5	60794.8	7597.12	751.053	61694.9	380.971	231.291	191.311	0.0882477	0.00222226
188.926	10.4	86703.3	207147	17017.8	58666.5	7504.05	724.29	62970.4	360.291	228.331	257.785	0.0865486	0.00297319
189.122	10.41	87682.3	208092	17252.9	56832	7660.56	678.864	63317.4	359.932	230.357	292.929	0.0873673	0.0033408
189.318	10.42	89420.8	212638	18193.7	53682.4	7898.3	745.746	64988	349.235	231.786	259.224	0.0883274	0.00289893
189.513	10.43	87257.5	210966	18073.2	57806.4	7545.24	746.564	63721	367.374	225.261	278.886	0.0864709	0.00319612
189.709	10.44	85915.5	210159	17551.5	61340	7450.43	739.299	61137.6	360.121	226.445	252.422	0.0867182	0.00293803
189.904	10.45	89682.8	217113	19583.2	52784.8	7689.28	694.485	67581.4	321.197	227.951	248.356	0.0857386	0.00276927
190.1	10.46	89023.6	212261	18298.8	54375.1	7615.65	788.487	68182	329.975	224.383	237.135	0.0855465	0.00266373
190.295	10.47	91008.2	216919	19371.6	50572	7967.17	664.212	67763.9	321.032	233.163	254.073	0.0875434	0.00279176
190.491	10.48	89389.9	212455	18109.3	53720.1	7929.47	758.45	64153.2	359.887	233.736	246.322	0.0887065	0.00275559
190.686	10.49	90230.3	212331	17922.9	52426.9	8035.77	760.849	65437	342.01	234.824	238.644	0.0890585	0.00264483
190.882	10.5	89078.1	209051	17298.7	53499.7	7984.31	811.874	62143.1	375.303	235.942	292.674	0.0896327	0.00328559
191.077	10.51	82595.6	200531	15582.3	66697.6	7132.2	893.619	56095	419.877	224.82	287.659	0.0863509	0.00348274
191.273	10.52	80970.9	202437	15670.9	72095.3	7052.92	952.68	52425.7	433.229	225.53	235.413	0.0871044	0.00290738
191.468	10.53	80469.7	202885	15889.8	72804.3	6971.43	920.951	52178.2	435.443	225.075	231.606	0.0866342	0.00287817
191.664	10.54	91035.1	216321	18997.2	51018.7	8112.06	825.703	65057.3	352.461	233.548	270.617	0.0891091	0.00297267
191.86	10.55	100957	235182	24779.4	33456.6	9191.82	753.531	74262.1	263.599	249.385	306.36	0.0910468	0.00303455
192.055	10.56	105419	245373	28262.4	27460.8	9739.04	734.657	77588.7	220.813	256.876	316.515	0.0923843	0.00300245
192.251	10.57	103753	243234	27205.4	29615.3	9509.49	773.523	76480.9	222.3	253.04	303.046	0.0916553	0.00292085
192.446	10.58	102873	242718	26149.4	31725.4	9527.74	659.989	74687.4	208.356	256.603	269.645	0.0926169	0.00262115
192.642	10.59	100316	237386	24354.8	35466.8	9304.59	651.605	72146.4	230.074	253.407	273.189	0.0927525	0.00272328
192.837	10.6	100631	238190	24767.6	35208.9	9268.98	627.223	74050.4	225.118	250.273	278.749	0.0921082	0.00276999
193.033	10.61	99010	235118	23459.4	38289.4	9162.68	634.096	72207.3	236.083	249.007	249.485	0.0925429	0.0025198
193.228	10.62	96720.4	231957	22844.2	40387.2	8736.25	671.478	69373.6	242.458	245.922	301.741	0.0903248	0.00311973
193.424	10.63	93005.7	226511	21281.4	46756.3	8308.26	676.696	65509.1	273.831	241.751	274.414	0.0893307	0.0029505
193.619	10.64	86828.9	217497	18715.4	60016.7	7671.39	771.626	59201.9	331.199	233.319	202.696	0.0883507	0.00233443
193.815	10.65	70703.9	178915	11848	104073	5734.13	1081.02	47892	558.975	196.071	228.173	0.0811007	0.00322716
194.01	10.66	67638.6	167852	10710	112832	5153.6	1154.19	48775	631.512	177.935	427.829	0.0761931	0.00632522
194.206	10.67	70991.5	176327	11915.7	101763	5522.33	1007.11	51163.6	559.003	185.893	429.261	0.0777886	0.00604666
194.401	10.68	73697.3	179305	12775.3	89868.9	5628.69	973.477	55531.2	542.446	187.351	544.112	0.0763758	0.00738307
194.597	10.69	75597.4	183919	13607	82755.2	5848.97	977.25	56578.2	525.448	193.918	485.205	0.07737	0.00641828
194.792	10.7	71722.3	174307	11728.4	95794.4	5494.71	1143.4	53333.6	581.095	187.492	363.321	0.0766109	0.00506567
194.988	10.71	66736.8	166931	10384.8	114966	5136.01	1339.37	46615.4	633.252	181.364	308.645	0.0769592	0.00462482
195.184	10.72	69057.6	170712	10847.7	106932	5400.59	1333.61	48577.7	605.179	185.174	323.756	0.0782042	0.00468821
195.379	10.73	72300.3	179405	12347.1	93295.6	5659.54	1073.67	50344.5	522.413	195.631	395.31	0.0782783	0.00546761
195.575	10.74	71541.6	179996	12497.1	95956.7	5524.97	945.67	50269.1	476.822	193.237	445.201	0.0772274	0.00622298
195.77	10.75	70206.4	175561	11889	99073.6	5407.34	1067.38	48919.6	537.778	190.171	467.512	0.0770207	0.00665911
195.966	10.76	65663.8	164965	10544.7	113918	4846.97	1161.51	46079.3	601.893	176.561	637.472	0.0738149	0.00970811
196.161	10.77	61416.7	151773	8883.72	130950	4340.65	1220.12	44849.7	679.016	161.625	824.554	0.0706753	0.0134256
196.357	10.78	62939.3	152943	9343.56	122145	4295.58	1079.71	50244	632.014	157.718	1079.65	0.0682496	0.0171538
196.552	10.79	65537.4	152149	9581.73	108569	4278.02	1084.23	59489.7	602.687	151.448	1522.13	0.0652761	0.0232254
196.748	10.8	61871.6	145780	8648.28	119676	3976.76	1143.11	54301.7	601.027	149.731	1373.26	0.0642744	0.0221953
196.969	10.81	57947.4	131949	7191.13	140269	3372.99	1311.08	62506.4	639.532	124.517	1348.68	0.0582079	0.0232742
197.19	10.82	55930	128053	6800.92	148913	3242.7	1455.34	59780.9	716.257	121.443	1246.57	0.0579777	0.022288
197.411	10.83	57498.4	132124	7453.52	137394	3263.44	1212.19	63615.7	651.736	125.307	1188.2	0.0567571	0.0206648
197.632	10.84	54959.7	125759	6937.89	142451	2947.68	1172.19	63689	667.579	120.675	1221.6	0.0536335	0.0222271
197.853	10.85	56240.4	132238	7545.15	144247	3188.83	1114.71	59660.3	690.083	126.035	1161.16	0.0567001	0.0206463
198.074	10.86	56604.2	132797	7510.73	137376	3266.69	1198.58	57098.1	671.209	132.311	1140.65	0.0577111	0.0201513
198.295	10.87	58397.5	133965	7473.03	135235	3454.13	1315.62	60416.5	686.909	130.348	1147.11	0.0591486	0.0196432
198.516	10.88	57507	135737	7585.36	140213	3494.91	1332.54	54459.3	686.871	134.141	1183.92	0.0607736	0.0205875
198.737	10.89	53973.3	129411	6935.24	154822	3197.45	1711.11	50571	774.42	128.302	938.25	0.0592413	0.0173836
198.978	10.9	57360	135186	7261.26	138231	3639.78	1499.61	50754.4	693.373	141.616	900.341	0.0634549	0.0156963
199.22	10.91	53739.4	128222	6649.34	159552	3283.35	1634.78	48468.4	806.403	129.406	969.804	0.0610976	0.0180464
199.461	10.92	56044.5	133752	7205.85	149594	3489.56	1767.39	50366.3	782.857	133.306	879.104	0.0622642	0.0156858
199.702	10.93	58795	139102	7814	137997	3675.25	1367.65	54921.4	714.325	139.919	659.62	0.0625095	0.011219
199.944	10.94	60310.3	142091	8368.28	129570	3772.78	1266.79	56133.7	755.546	142.686	800.846	0.0625562	0.0132788
200.185	10.95	63119.8	153427	9389.28	121682	4325.64	1315.79	51005.9	708.486	159.383	597.316	0.0685306	0.00946321
200.427	10.96	71576	163188	10375.3	85274.8	5067.28	3267.56	62302	546.004	166.54	478.744	0.0707957	0.00668861
201.151	10.99	93948.1	217775	19135.9	43319.8	8459.53	1280.23	68754.3	287.034	235.056	276.507	0.0900447	0.00294319
201.393	11	93170.1	217885	19080.6	44835.1	8475.81	1276.55	67725.4	291.302	233.305	287.284	0.0909714	0.00308344
201.634	11.01	93959.1	214855	18109.5	44898.5	8672.49	1266.26	67665.2	313.478	236.922	256.117	0.0923007	0.00272583
201.875	11.02	94802.8	217577	19113.9	42123.7	8469.4	1320.99	69680.9	279.81	234.255	311.603	0.089337	0.00328685
202.117	11.03	96055.7	218819	19016.1	41643.6	8883.33	1282.56	69643.9	296.257	240.57	229.942	0.092481	0.00239384
202.358	11.04	94427	215924	18309.3	44755.1	8682.6	1247.9	68473.6	307.141	235.841	257.196	0.0919503	0.00272376
202.599	11.05	95671.8	219850	18997.8	42331.5	8855.2	1217.9	68487.6	266.949	240.465	269.35	0.0925581	0.00281536
202.841	11.06	95036.7	220045	18977.1	42929.9	8908.77	1216.83	67169	269.066	241.896	261.888	0.0937403	0.00275565
203.082	11.07	93589.3	211777	17715.7	45154.2	8391.11	1266.8	70366.5	299.895	228.837	327.671	0.0896588	0.00350116
203.323	11.08	94725.3	213671	17976.9	42778	8680.78	1210.89	68856.6	297.939	239.281	280.465	0.0916417	0.00296083
203.565	11.09	92587.7	211685	17543.9	45799.7	8431.96	1231.64	65521.9	309.772	236.762	330.07	0.09107	0.00356495
203.806	11.1	93866.4	214147	17963	43762.5	8623.2	1140.51	65641.6	289.586	241.981	335.452	0.0918668	0.00357371
204.047	11.11	93826.9	212154	17344.4	45112.7	8725.11	1164.77	66280.8	302.556	239.183	324.659	0.0929916	0.00346019
204.289	11.12	94029.6	208590	16429	44845.4	8967.55	1061.78	65660.2	316.505	245.281	304.35	0.0953694	0.00323675
204.53	11.13	94715.6	214402	18079.2	42784.5	8869.71	1130.5	66295.3	307.707	243.147	332.985	0.0936457	0.00351563
204.772	11.14	93344.1	211097	17334.3	45479	8643.03	1134.47	66702.2	312.04	236.884	346.313	0.0925932	0.00371007
205.013	11.15	94399.4	213782	17480.5	45040.7	8995.72	1024.27	65587.3	306.071	244.971	283.75	0.0952942	0.00300585
205.254	11.16	93659.9	213830	17786.8	44919.4	8816.2	1062.48	64884.9	307.369	242.755	332.857	0.0941299	0.00355389
205.496	11.17	89430.3	201639	14996.3	50986.9	8571.64	898.509	59544.6	330.529	246.517	368.862	0.0958471	0.00412457
205.737	11.18	87336	191557	13109.8	52779.7	8514.28	752.593	56283	373.319	257.217	327.689	0.0974888	0.00375205
205.979	11.19	81407.3	186049	12237.3	64800	7398.19	1521.23	52889.6	419.054	230.904	285.218	0.0908787	0.00350359
206.22	11.2	72572.8	172997	10791.2	91145.4	5882.53	2519.73	51127.4	556.364	189.398	300.958	0.081057	0.00414698
206.461	11.21	70809.1	168488	10083.8	101726	5920.41	1547.47	49017.7	644.536	191.286	276.907	0.083611	0.00391061
206.703	11.22	65744.3	163716	9584.53	118488	5328.34	1721.06	43652	706.48	185.927	200.28	0.0810463	0.00304634
206.944	11.23	64528.1	163915	9914.98	122421	5018.98	1585.75	43632.9	705.633	181.717	206.967	0.0777798	0.0032074
207.185	11.24	61443.3	159531	9371.01	136689	4735.62	1726.87	40296.5	774.408	176.067	184.211	0.077073	0.00299807
207.427	11.25	57995.1	153852	8686.14	150957	4458.6	1826.99	35687	833.797	172.864	197.386	0.0768789	0.00340349
207.668	11.26	57853	152848	8490.18	154106	4408.73	1703.52	37096.4	765.447	169.642	183.01	0.0762056	0.00316336
207.91	11.27	49018.2	133049	6147.9	206512	3821.94	2304.52	27682.5	936.231	154.065	159.089	0.0779699	0.00324552
208.151	11.28	48611.8	129091	5690.97	206932	3776.59	2192.02	27670	931.571	154.582	158.86	0.0776889	0.00326793
208.392	11.29	54019.8	141801	6926.96	176443	4274.58	1925	31952.7	846.743	165.344	180.708	0.0791299	0.00334522
208.634	11.3	62339.6	156766	8418.26	137985	5156.03	1419.13	39664.5	730.167	184.079	157.337	0.0827088	0.00252387
208.875	11.31	72660.8	175872	10981.6	98287.4	6254.72	1009.09	48474.4	604.555	206.671	187.539	0.0860812	0.00258102
209.116	11.32	73969.8	178141	11563.1	93777.9	6190.91	994.738	52136.8	564.373	201.653	227.642	0.0836951	0.0030775
209.358	11.33	75572.4	182576	11805.2	89618.2	6669.37	908.629	49888	532.793	216.353	179.014	0.0882514	0.00236877
209.599	11.34	73085.2	176035	11055	95384.7	6299.43	879.077	48282.1	588.34	210.96	212.569	0.086193	0.00290851
209.841	11.35	73607.7	177315	10969.5	96897.2	6475.56	933.327	48798.6	571.454	210.575	175.664	0.0879739	0.00238649
210.082	11.36	74190.1	176774	10916	95051.5	6553.66	927.676	49292.3	589.377	210.779	194.762	0.088336	0.00262518
210.323	11.37	74908.3	179135	11273.5	91367.5	6643.13	925.982	49232.9	562.736	214.704	197.8	0.0886835	0.00264057
210.565	11.38	74344.6	179795	11551.7	94130.5	6451.12	910.121	49589.6	561.303	208.165	237.968	0.0867732	0.00320088
210.806	11.39	73613.1	178203	11233.4	96037.5	6405.31	1003.72	49154	558.148	206.431	222.665	0.0870132	0.0030248
211.047	11.4	75640.4	181790	11565	91236.3	6770.38	903.455	49928.6	523.228	212.796	224.99	0.0895074	0.00297447
211.289	11.41	62585.8	157077	8677	133674	5163.4	1327.35	39774.1	790.064	185.608	184.984	0.0825012	0.00295568
211.53	11.42	54094.9	139035	6876.85	174118	4227.78	1629.13	33449.9	1009.15	163.257	203.703	0.0781549	0.00376566
211.772	11.43	55497.2	141348	7195.15	164228	4313.75	1689.13	35694.3	1047.37	166.574	154.393	0.0777291	0.002782
212.013	11.44	56699.4	140194	7075.53	158689	4458.65	1691.73	37409	1175.57	166.38	167.831	0.0786366	0.00296001
212.254	11.45	58144.2	140715	7100.63	150719	4599.08	1706.64	39558.6	1205.53	169.069	147.37	0.0790977	0.00253455
212.496	11.46	57710	140033	7078.34	153835	4518.74	1739.18	39522.4	1208.53	164.957	175.342	0.0783008	0.00303833
212.737	11.47	52123.7	138945	7015.24	184685	3961.6	1888.06	31637.9	994.58	158.023	190.238	0.0760038	0.00364975
212.979	11.48	47938.5	129793	6114.12	208866	3528.62	2104.69	28310.9	982.014	147.799	215.63	0.0736071	0.00449805
213.22	11.49	49637.1	134015	6428.89	200506	3725.68	2221.57	29686.2	965.787	152.339	156.311	0.0750585	0.00314908
213.461	11.5	48704.7	131309	6229.49	204841	3634.63	2142.3	28929.3	991.284	149.16	207.82	0.0746259	0.00426694
213.703	11.51	47599.5	126897	5868.76	209732	3446.24	2382.13	29365.9	1056.78	144.206	183.856	0.0724007	0.00386255
213.944	11.52	42519.3	112830	4677.67	242119	2992.12	2962.12	25987.2	1230.42	129.935	196.48	0.070371	0.00462096
214.185	11.53	44464.4	114977	4780.19	226985	3139.63	3575.34	28818.1	1210.47	130.89	174.757	0.0706101	0.00393028
214.427	11.54	47888.4	122567	5434.85	201342	3361.88	3649.53	32275.9	1096.77	137.972	169.969	0.0702024	0.00354926
214.668	11.55	49277.6	124994	5834.08	197966	3345.78	3160.33	35810.7	1069	131.246	286.227	0.0678966	0.00580846
214.91	11.56	50943.7	128133	6210.71	183266	3414.09	2766.36	37258.7	995.277	135.555	392.468	0.0670169	0.00770395
215.151	11.57	51351.9	130109	6625.65	180297	3354.76	2686.76	38547.8	987.803	131.866	578.337	0.0653288	0.0112622
215.392	11.58	52661.4	134365	7126.81	168091	3439.87	2465.87	39042.4	900.569	138.35	591.063	0.0653205	0.0112238
215.634	11.59	55786.5	141129	8011.54	151962	3584.1	2241.02	44115.3	807.818	140.965	601.863	0.0642466	0.0107887
215.875	11.6	58937.4	149817	9182.87	136339	3861.09	1626.13	46678.2	721.543	150.642	621.906	0.0655116	0.010552
216.116	11.61	59045.9	150947	9092.63	140145	4000.44	1743.76	45150.7	764.436	153.508	437.785	0.0677512	0.00741432
216.358	11.62	59256.4	152575	9063.81	139683	4172.65	1558.85	42122.8	741.961	161.641	419.954	0.0704169	0.00708706
216.599	11.63	59167.6	152502	8981.79	139739	4216.54	1635.75	41009.7	755.84	163.516	407.852	0.0712643	0.00689315
216.841	11.64	57855.3	148363	8570.13	146054	4068.7	1535.05	40834.3	815.049	159.178	428.392	0.0703254	0.00740454
217.082	11.65	58252.1	149017	8478.1	146907	4233.86	1595.4	39781.8	847.903	161.416	409.913	0.0726817	0.00703688
217.323	11.66	57017.8	145859	8221.18	149258	4061.36	1391.84	39000.1	833.082	160.302	502.634	0.0712297	0.00881538
217.565	11.67	59103.8	150755	8855.05	141906	4185.88	1232.21	41815.4	753.309	161.033	575.659	0.0708225	0.00973979
217.806	11.68	59533.6	149834	8659.52	143189	4253.88	1171.22	42696.3	774.079	159.557	598.524	0.0714534	0.0100536
218.048	11.69	58231.9	145928	8252.19	145724	4105.64	1175.65	42700.3	785.891	157.608	556.726	0.070505	0.0095605
218.289	11.7	58788.4	146395	8429	143835	4031.34	1128.74	45920	730.916	152.469	652.396	0.0685737	0.0110974
218.53	11.71	58977.4	145531	8581.77	136635	3877.68	1224.19	48635.1	706.894	149.534	767.028	0.0657486	0.0130055
218.772	11.72	56569.4	139766	7869.52	144023	3751.32	1119.95	45196	780.379	151.815	620.071	0.0663136	0.0109612
219.013	11.73	53432.4	129259	6989.67	155378	3182.83	1050.08	49318.7	765.268	135.734	726.377	0.0595676	0.0135943
219.255	11.74	50906.3	124721	6451.42	167204	3084.86	1080.35	42746	863.512	136.411	828.587	0.0605988	0.0162767
219.496	11.75	58557.7	141880	8392.89	132930	3689.9	1003.81	52495.6	673.143	146.365	871.661	0.063013	0.0148855
219.737	11.76	55469.6	135296	7417.46	157420	3561.79	1093.07	47871.7	803.1	137.447	856.345	0.0642116	0.0154381
219.978	11.77	52945.8	124745	6387.97	159779	3137.41	861.755	50151.5	752.18	133.859	797.199	0.059257	0.0150569
220.22	11.78	56310.5	136445	7316.67	150634	3739.98	983.722	46510.1	738.718	146.869	722.816	0.066417	0.0128363
220.626	11.79	64302.1	152834	9040.17	111240	4515.2	899.602	52870.2	526.228	170.691	596.543	0.0702186	0.00927719
221.033	11.8	58281.2	142355	8397.58	133498	3738.18	1173.81	49113.2	722.884	148.55	931.706	0.0641405	0.0159864
221.439	11.81	55149.4	133175	7233.08	149208	3491.11	1268.96	48007.2	794.901	140.149	782.158	0.0633029	0.0141825
221.846	11.82	54151.5	131622	7276.47	152696	3202.71	1132.63	50095.9	736.654	135.068	792.519	0.0591436	0.0146352
222.252	11.83	60069	145528	8357.28	130329	4087.46	952.533	47038.9	674.712	159.53	857.383	0.068046	0.0142733
222.658	11.84	63517.2	161577	10855.1	113658	4302.1	1092.37	49313	580.263	167.092	729.219	0.0677312	0.0114806
223.064	11.85	58995.5	153439	9487.06	140815	4140.71	1136.98	40590.5	749.588	159.33	983.07	0.0701869	0.0166635
223.471	11.86	59833.5	156063	9667.39	138467	4307.97	1413.58	40450.2	789.7	162.6	664.303	0.0719994	0.0111025
223.877	11.87	57026.6	140117	7496.44	147108	4331.7	1510.05	37295.2	1252.04	166.317	391.582	0.0759594	0.00686666
224.284	11.88	52166.5	124661	5920.37	171381	3971.96	1643.27	35138.1	1863.62	155.038	248.694	0.07614	0.00476732
224.69	11.89	50008.8	128901	6540.91	184589	3503.82	1752.76	32048.1	1228.64	143.93	681.028	0.0700642	0.0136182
225.096	11.9	49539.2	129398	6613.77	189034	3449.42	1930.86	31779.3	1205.72	141.185	650.76	0.0696302	0.0131363
225.503	11.91	51064.9	128612	6491.39	179438	3617.49	1825.22	34031.5	1350.82	144.046	579.34	0.070841	0.0113452
225.909	11.92	58185.2	141007	7792.32	139258	4293.33	1519.64	40592.3	1274.66	164.852	378.738	0.0737873	0.00650918
226.315	11.93	58496.4	142212	7869.65	141648	4379.61	1341.95	40870.5	1256.11	165.368	356.459	0.0748696	0.00609368
226.722	11.94	58075.5	148947	8504.21	148165	4460.79	1441.3	36558.7	1112	169.432	350.178	0.0768101	0.0060297
227.128	11.95	59451.2	153993	9180.67	140116	4491.75	1293.8	37689.4	945.347	173.658	377.585	0.0755536	0.00635118
227.534	11.96	60607.4	154862	9088.73	139353	4652.89	1421.1	39441.2	927.851	171.617	343.699	0.076771	0.00567091
227.941	11.97	60742.8	152033	8731.63	135988	4687.47	1425.87	40180.3	986.782	173.337	316.323	0.0771691	0.00520759
228.347	11.98	60214.8	151187	8605.27	140577	4704.65	1367.19	39726	1044.61	172.622	277.196	0.0781311	0.00460345
228.753	11.99	57335.4	146896	8223.46	155049	4327.14	1496.7	37598.7	1076.87	162.984	318.755	0.0754707	0.00555948
229.16	12	59066.4	153960	9014.4	142854	4511.07	1348.35	37228.1	894.978	174.499	306.892	0.0763729	0.0051957
229.566	12.01	59416.1	153280	8781.03	143514	4586.44	1437.29	37829.7	896.014	173.558	280.899	0.0771918	0.00472766
229.972	12.02	58164.1	150330	8434.72	147463	4510.64	1448.12	36264	959.98	174.264	255.999	0.0775502	0.00440132
230.379	12.03	56806.5	147312	8041.37	156591	4361.01	1492.68	35545.1	981.404	169.62	234.407	0.0767696	0.0041264
230.785	12.04	59288.3	152667	8566.55	146222	4599.91	1481.88	38094.5	861.213	172.47	246.383	0.0775854	0.00415568
231.191	12.05	58251.3	149163	7924.6	153573	4600.6	1466.16	36561.4	875.19	173.373	199.878	0.0789785	0.0034313
231.598	12.06	55673.6	146079	7688.24	166066	4348.65	1548.81	33840.9	916.119	168.091	214.844	0.0781098	0.003859
232.004	12.07	55288.4	144544	7442.35	171044	4348.71	1718.21	33994.6	964.416	165.45	170.966	0.078655	0.00309226
232.41	12.08	56835.4	149549	8227.03	156351	4350.23	1499.67	35289.2	857.061	170.791	229.176	0.0765408	0.00403228
232.817	12.09	59387.4	153137	8456.85	146619	4649.92	1486.69	37736.5	818.743	175.677	196.258	0.0782981	0.00330472
233.223	12.1	56590.7	146385	7708.65	161378	4383.95	1769.24	35895.2	937.25	167.064	174.932	0.0774677	0.00309119
233.629	12.11	57493.3	147440	7850.92	153409	4412.37	1755.57	37043.7	877.822	169.203	196.077	0.0767458	0.00341043
234.036	12.12	61639.4	154932	8629.98	136213	4796.78	1618.31	41830	773.454	175.317	184.574	0.07782	0.00299441
234.442	12.13	58019.5	146762	7794.86	152537	4462.36	1760.06	38432.7	927.792	166.828	202.707	0.0769115	0.00349378
234.848	12.14	51711.8	132781	6420.51	179300	3842.22	2555.9	33178.2	1138.57	154.28	166.9	0.0743007	0.00322751
235.255	12.15	50118.7	129995	6309.04	184844	3577.37	2875.53	32285.1	1130.79	147.129	238.806	0.071378	0.00476481
235.661	12.16	48611	124935	6059.93	187124	3250.71	2933.59	32396.8	1129.38	137.854	493.683	0.066872	0.0101558
235.783	12.163	50195.2	129798	6239.31	187981	3541.82	3263.2	32887.3	1080.25	142.222	272.391	0.070561	0.00542664
236.368	12.1774	49860.2	127766	6231.92	184747	3388.04	2876.66	33373.5	1063.16	138.774	495.804	0.0679507	0.00994388
236.953	12.1918	50564.7	128437	6385.92	184679	3407.93	3150.04	35262.9	1123.87	132.651	645.526	0.0673975	0.0127663
237.538	12.2062	52039.5	131949	6693.59	173151	3533.29	2911.34	36042.2	1022.25	139.404	596.279	0.0678963	0.0114582
238.124	12.2206	51882.4	131517	6806.22	172429	3420.34	2757.16	37037.3	1007.81	136.148	756.23	0.0659249	0.0145758
238.709	12.235	51982.1	132132	6932.57	175147	3460.18	2380.72	36323.7	1068.08	135.667	978.068	0.0665647	0.0188155
239.209	12.2473	49706	126659	6576.89	185459	3220.05	1744.82	35070.5	1160.78	132.485	1174.51	0.0647819	0.0236291
239.647	12.2581	50415.8	126074	6545.63	182856	3182.38	1581.32	39143.9	1081.38	128.874	1078.94	0.0631227	0.0214008
240.09	12.269	54148.6	134128	7394.11	161333	3499.59	1442.94	42494.9	1016.99	138.643	908.521	0.0646295	0.0167783
240.529	12.2798	57206.1	140085	8463.14	139935	3445.03	1158.43	51980.6	753.739	137.721	1134.94	0.0602213	0.0198394
240.968	12.2906	60129.1	146248	9312.65	128199	3572.93	1234.78	58666.6	660.736	137.635	989.074	0.0594209	0.0164492
241.398	12.3015	61214.2	151436	9437.84	131043	3951.16	1438.27	52283.6	701.146	146.823	734.729	0.0645464	0.0120026
241.745	12.3123	62665	159698	9827.17	126926	4573.05	1514.89	43600.4	725.02	170.86	386.551	0.0729762	0.00616853
242.092	12.3231	63323.9	161873	9761.98	130629	4824.18	1685.33	44106.3	748.956	172.657	211.55	0.0761826	0.00334076
242.443	12.334	60490.6	155882	8941.79	141775	4545.02	1962.87	41297	779.229	168.016	192.626	0.075136	0.00318439
242.79	12.3448	61403.3	157097	9092.26	138771	4664.47	1959.02	42393.7	774.89	166.899	232.127	0.0759645	0.00378037
243.14	12.3557	63968.5	164020	9870.76	127946	4925.92	1871.53	44624.3	676.885	174.03	190.421	0.0770053	0.00297679
243.487	12.3665	63551.3	161885	9724.7	130415	4853.87	1877.26	44620.2	764.142	171.214	199.091	0.0763772	0.00313277
243.834	12.3773	62140.6	159366	9517.65	134188	4696.69	1708.24	43237.2	779.321	170.7	213.341	0.0755817	0.0034332
244.184	12.3882	62591.9	161977	9799.4	131881	4757.61	1429.61	42144.2	707.018	176.12	239.909	0.07601	0.00383291
244.531	12.399	65545.2	167794	10393.4	123137	5183.59	1459.25	44264	717.895	182.461	186.12	0.0790842	0.00283957
244.882	12.4099	67047	174042	11197.8	117396	5335.1	1427.33	44702.6	629.867	187.195	181.798	0.0795726	0.0027115
245.229	12.4207	66411	172672	11091.7	120605	5242.88	1460.85	44699.8	662.396	183.568	184.985	0.078946	0.00278546
245.576	12.4315	66215.8	173001	11002.4	121623	5248.93	1492.75	43791.5	629.307	184.716	182.713	0.07927	0.00275936
245.926	12.4424	61153.5	160263	9288.62	142521	4759.19	1823	40278.1	714.591	171.792	185.431	0.0778236	0.00303222
246.273	12.4532	57577.1	151563	8301.18	158478	4409.1	2204	37354.7	823.81	162.955	185.672	0.0765773	0.00322476
246.62	12.464	58091.2	152155	8532.92	152028	4346.21	2086.88	38598.1	817.486	164.511	190.828	0.074817	0.00328497
246.97	12.4749	57353.8	150498	8451.51	156684	4265.87	1964.09	38000.2	868.326	160.979	236.419	0.0743781	0.00412212
247.317	12.4857	56955.2	156165	9615.69	155173	4089.36	1770.99	36964.8	839.512	161.641	279.597	0.0717996	0.00490906
247.668	12.4966	58237.7	161999	9816.47	149422	4414.97	1474.99	34497	676.009	178.657	200.811	0.0758096	0.00344813
248.015	12.5074	59153.9	160971	9269.17	154032	4625.79	1732.57	36284.5	675.412	173.492	162.186	0.0781993	0.00274176
248.362	12.5182	61684.6	166597	10174.5	139925	4829.58	1510.39	38280.6	666.814	179.469	194.471	0.0782948	0.00315267
248.712	12.5291	61182.4	162126	9504.17	139969	4798.01	1580.1	38620.6	679.495	179.052	182.783	0.0784215	0.00298751
249.059	12.5399	58464.4	154676	8417.89	152583	4602.1	1831.35	35963	729.397	175.561	147.852	0.0787162	0.00252893
249.406	12.5507	58020.6	154307	8529.1	156259	4491.79	1765.19	36266.1	753.831	170.74	171.51	0.0774172	0.00295601
249.756	12.5616	61861.1	166737	9967.27	140012	4939.22	1587.71	37851.5	656.414	182.934	151.076	0.0798438	0.00244219
250.103	12.5724	62316.4	166172	9864.26	138404	4947.61	1443.52	38864	632.487	183.179	159.1	0.0793951	0.00255311
250.454	12.5833	60937.6	161917	9329.28	147018	4831.99	1521.49	38303.5	684.72	176.359	171.371	0.079294	0.00281223
250.801	12.5941	59745.9	158416	8930.13	149556	4660.72	1639.49	37865.5	674.543	173.456	181.3	0.0780091	0.00303453
251.148	12.6049	57137.5	151379	8165.01	163558	4358.07	1937.94	37540.8	722.65	161.658	180.143	0.0762735	0.0031528
251.498	12.6158	57920.6	154983	8526.38	156454	4481.41	1773.95	35962.7	687.798	171.386	173.578	0.0773716	0.00299682
251.845	12.6266	58345.9	152953	8200.22	158705	4614.84	1844.17	37224	799.028	170.271	124.856	0.0790945	0.00213993
252.192	12.6374	59427	157199	8927.01	152339	4604.52	1720.96	38421.5	748.782	168.831	186.886	0.0774819	0.00314481
252.542	12.6483	59311.1	157970	8921.1	151488	4607.07	1543.16	37879	666.433	172.722	177.518	0.0776765	0.002993
252.883	12.6589	57422.1	152335	8089.74	161689	4547.34	1820.09	35898.1	743.525	170.761	129.459	0.0791915	0.00225452
253.214	12.6692	53337.4	144411	7333.06	181292	4097.76	2024.31	32704.3	750.085	160.028	161.349	0.0768271	0.00302506
253.542	12.6794	52085.9	139112	6823.91	191764	3916.02	2278.24	33119	816.911	150.12	182.496	0.0751837	0.00350375
254.204	12.7	54739.7	143407	7018.25	178450	4244.34	2445.68	35185.4	779.587	157.62	128.68	0.0775368	0.00235077
254.531	12.7102	58461.8	153104	8075.13	155704	4576.22	2332.18	37070.2	704.105	169.165	139.228	0.0782772	0.00238152
254.862	12.7205	58301.7	152767	8301.32	151855	4408.34	2265.55	37900.8	706.393	167.121	174.079	0.0756124	0.00298583
255.19	12.7307	59022.2	153021	8373.78	150305	4470.41	2383.47	39567.6	756.219	164.73	166.361	0.0757413	0.00281861
255.521	12.741	62034.1	162009	9475.93	135199	4805.03	1949.5	41128.6	672.256	176.242	157.2	0.0774579	0.00253408
255.852	12.7513	63235.9	165732	10049.7	129563	4885.86	1705.23	41831	630.602	179.127	190.832	0.077264	0.00301778
256.18	12.7615	61812.7	162838	9794.13	140300	4765.3	1765.94	41807.5	729.732	170.535	179.089	0.0770925	0.00289728
256.511	12.7718	57304.2	151381	8317.2	155714	4356.31	2058.5	36678.4	798.145	167.025	176.675	0.0760208	0.00308311
256.842	12.7821	57294.4	148675	7888.41	158922	4379.72	2327.57	37511.3	849.047	163.151	159.822	0.0764424	0.00278948
257.17	12.7923	57056.5	148849	7889.75	158298	4355.24	2473.18	37032.8	839.05	164.952	136.322	0.0763321	0.00238925
257.501	12.8026	55946.9	144756	7429.4	166736	4203.5	2844.08	37641.2	848.562	155.126	160.99	0.0751336	0.00287755
257.815	12.8124	61650.9	159931	9305.33	138886	4702.5	1884.79	41996.4	698.02	170.578	184.157	0.0762763	0.00298709
258.069	12.8203	69095.5	173029	10940.4	108345	5501.91	1542.51	48613	595.575	188.026	178.548	0.0796275	0.00258408
258.323	12.8282	74475.7	184738	12653.6	92138.5	6130.64	1296.01	53847.2	520.599	198.772	157.04	0.0823173	0.00210861
258.577	12.8361	71390.8	177742	11505.2	100435	5747.76	1864.85	50888.2	540.184	188.697	188.011	0.0805113	0.00263355
258.831	12.844	62020.9	162012	9573.21	134274	4751.89	1837.36	41412.2	666.667	175.936	172.327	0.0766175	0.00277852
259.085	12.8519	55268.6	145359	7717.06	171918	4025.39	2595.44	38113.5	829.664	149.385	202.238	0.0728332	0.00365918
259.339	12.8598	53016.1	138626	6752.23	178716	3860.79	3514.76	35509.4	808.43	149.649	138.394	0.0728229	0.00261042
259.592	12.8677	54662.2	141605	7089	170938	3962.67	3816.71	37796.3	792.934	148.117	163.062	0.0724938	0.00298309
259.843	12.8755	60542.6	154378	8432.43	144759	4551.78	3006.04	42821.1	705.706	160.428	166.314	0.0751832	0.00274705
260.097	12.8834	65994.5	169274	10534.2	119867	5025.36	1918.14	47405.9	580.271	175.878	181.871	0.0761483	0.00275585
260.351	12.8913	67386.4	173404	10832.4	116121	5296.66	1619.46	47009.3	524.261	184.625	156.968	0.0786014	0.00232938
260.605	12.8992	64924.7	168837	10385.8	124780	4975.6	1900.24	45586.4	567.949	176.014	169.406	0.0766366	0.00260926
260.859	12.9071	63653.4	166561	10068.2	128566	4887.33	1843.86	43573.9	581.324	177.311	162.624	0.0767804	0.00255483
261.112	12.915	58660.9	155524	8829.52	155546	4362.24	2161.45	40464.6	722.937	160.4	159.75	0.0743638	0.00272327
261.366	12.9229	59066.4	157171	8984.02	155133	4436.4	2148.65	40320.7	726.066	161.993	147.023	0.0751086	0.00248911
262.128	12.9466	69227.4	177955	11832.8	106067	5360.74	1627.45	48273.3	527.221	187.464	203.564	0.0774367	0.00294051
262.382	12.9545	66561.8	173229	11551.7	113481	4867.71	1676.26	48093.2	526.812	175.632	291.003	0.0731307	0.00437192
262.636	12.9624	61978	164364	10212.3	133568	4523.52	2001.13	43296.3	628.089	168.531	209.056	0.0729858	0.00337306
262.886	12.9702	60328.4	161565	9853.43	139687	4386.05	2308.09	41191.3	634.343	163.957	257.492	0.0727029	0.00426817
263.14	12.9781	62441.3	166566	10604.2	132012	4550.12	1874.16	43520.1	602.115	167.56	273.78	0.0728704	0.00438459
263.394	12.986	65647.8	171530	11208.9	121382	4876.99	1613.6	47386.6	564.469	171.8	276.354	0.0742902	0.00420965
263.648	12.9939	68663.4	175923	11811.2	109769	5212.48	1490.83	50290.8	571.421	180.358	215.456	0.0759134	0.00313786
263.902	13.0018	66191.9	173166	11469.8	119233	4888.54	1573.94	47763.7	559.315	173.873	252.954	0.073854	0.00382152
264.155	13.0097	69889.7	176391	11666.1	107434	5442.56	1319.2	50485	565.202	184.27	233.773	0.0778735	0.00334488
264.409	13.0176	78731.1	192248	14434.2	77709.9	6258.02	1073.15	60348.9	433.794	200.276	249.006	0.0794859	0.00316275
264.663	13.0255	75229.2	187548	13134.1	90483.1	5974.67	1177.69	56076.5	417.035	194.036	228.639	0.0794195	0.00303923
264.917	13.0334	70813.5	178188	12165.6	103435	5377.16	1345.36	53600.9	535.995	180.557	260.506	0.075934	0.00367875
265.171	13.0413	78770.9	193183	14032.5	80707	6491.1	1155.56	58789.1	427.653	202.786	188.584	0.0824048	0.00239408
265.425	13.0492	82019.3	199955	15559.1	70800.9	6765.46	982.7	61681.9	386.415	208.63	245.381	0.0824862	0.00299175
265.679	13.0571	80315.5	194102	14770.8	76166.2	6552.87	1092.31	61861	489.441	200.323	231.118	0.0815892	0.00287763
266.183	13.0728	80320.4	196168	15252	73669.8	6464.57	963.588	61075.6	433.875	205.029	250.71	0.0804848	0.00312137
266.414	13.08	80250.4	196099	15173	76802	6500.86	865.064	62163.8	442.637	201.204	252.734	0.0810072	0.00314932
266.643	13.0871	76302.7	188911	13734.6	87706.2	6042.72	1014.93	57989	469.576	194.811	229.881	0.079194	0.00301275
266.874	13.0943	70010.4	180027	12451.4	104983	5366.09	1083.36	49995.2	533.643	189.163	227.488	0.076647	0.00324935
267.102	13.1014	67185.6	174446	11688	116758	5049.89	1232.76	48173.4	581.385	178.397	260.911	0.0751633	0.00388343
267.333	13.1086	68596.5	177955	12038.4	113427	5279.26	1336	48692.5	577.871	181.081	229.947	0.0769611	0.00335216
267.562	13.1157	72963	189040	14253.3	94724.6	5483.44	1232	54161.1	466.576	185.5	311.985	0.0751536	0.00427594
267.793	13.1229	77747.7	198404	15539.1	82213.7	6087.61	1142.42	58451.5	404.974	196.95	220.895	0.0782996	0.00284117
268.249	13.1371	75808.3	197716	15283	85252.7	5969.7	1098.58	53809.6	398.97	203.837	186.035	0.0787474	0.00245403
268.481	13.1443	72973.7	191593	14085.9	94705.1	5628.86	1342.31	52123.9	409.723	193.877	191.989	0.0771354	0.00263093
268.709	13.1514	70273.4	181868	12475.4	106811	5314.28	1721.39	51915.8	478.78	178.835	216.065	0.0756229	0.00307463
268.94	13.1586	69630.1	180284	12121.4	108511	5293.67	1709.19	51048.3	482.447	181.189	174.277	0.0760257	0.0025029
269.168	13.1657	68192.3	176038	11314.2	114311	5215.64	1700.33	48970.1	478.411	179.064	205.719	0.0764844	0.00301675
269.4	13.1729	65564.9	169111	10349.1	121885	4989.87	1779.88	46441.8	531.972	178.286	166.284	0.0761059	0.00253618
269.628	13.18	61246.4	156926	8917.67	141648	4467.73	2064.45	44571.6	615.797	161.247	224.233	0.0729468	0.00366116
269.856	13.1871	60762	156499	8705.13	146120	4520	2274.26	43671.4	629.702	161.489	167.987	0.0743886	0.00276467
270.087	13.1943	62228.6	159485	9047.72	138255	4686.27	2088.17	43836.2	622.479	167.918	172.53	0.0753073	0.00277251
270.316	13.2014	66703.8	169167	10453.1	119428	5080.28	1642.01	48717	551.063	175.085	217.384	0.0761617	0.00325894
270.775	13.2157	67135.8	171362	10699.2	113994	5129.98	1417.21	47404.9	501.403	185.305	189.287	0.076412	0.00281946
271.006	13.2229	63794.3	162324	9322.04	133698	4892.26	1745.79	45652.6	597.986	172.097	154.375	0.0766881	0.00241989
271.235	13.23	68667	171350	10540.8	113629	5451.49	1451.46	49354.7	575.654	184.323	165.792	0.0793903	0.00241444
271.521	13.2389	77029.3	187110	12691.4	87705	6414.4	1072.84	57060.8	444.51	201.868	168.086	0.0832722	0.00218211
271.845	13.249	78326	189186	13084.6	81579.5	6524.86	1059.15	57709.2	417.22	207.134	178.725	0.0833039	0.00228181
272.17	13.2591	78073.2	187902	12962.9	85232.8	6498.53	1007.6	59195.2	453.063	200.598	186.331	0.0832363	0.00238662
272.497	13.2693	78536.8	192192	13626.5	81300.8	6548.46	831.028	56787.8	391.538	211.386	196.158	0.0833808	0.00249766
272.822	13.2794	69535.6	177987	11586.7	109954	5512.83	1164.08	48286.8	517.083	191.112	180.274	0.0792806	0.00259254
273.147	13.2895	66678.2	173105	11014.8	117969	5141.54	1317.8	46102.1	531.723	185.201	182.047	0.0771097	0.00273023
273.474	13.2997	64884.1	169166	10246.5	123802	5044.98	1402.99	43370.5	525.078	186.818	154.395	0.0777536	0.00237954
273.799	13.3098	62989.6	165461	10037.9	130709	4775.48	1580.35	42460.7	595.877	178.385	179.572	0.0758137	0.00285082
274.123	13.3199	61302.6	159016	9156.77	140628	4577.63	1898.63	42685.9	636.758	167.648	191.735	0.0746727	0.00312769
274.448	13.33	56551.7	148043	7850.29	162644	4144.87	2264.28	38979.7	689.617	156.401	192.521	0.0732935	0.00340433
274.776	13.3402	52890.9	138473	6903.27	174046	3816.65	2589.7	34951.2	797.334	153.536	193.866	0.0721608	0.00366539
275.1	13.3503	53019.5	136291	6493.9	181325	3881.29	2803.85	35971.1	822.147	148.682	169.906	0.073205	0.00320459
275.425	13.3604	53752.8	136781	6544.69	176740	3965.37	2901.95	36887.3	869.423	150.05	155.461	0.0737705	0.00289214
275.753	13.3706	56451.8	144136	7232.4	162034	4290.3	2589.87	37902.1	809.862	160.62	138.563	0.0759993	0.00245454
276.077	13.3807	61590.3	156264	8708.43	138598	4690.35	1897.95	43174.4	684.322	170.246	163.515	0.076154	0.00265488
276.402	13.3908	64069.2	162637	9604.62	130640	4896.02	1602.28	45997.9	649.677	172.431	184.364	0.0764177	0.00287757
276.681	13.3995	61340.5	157554	8943.53	141558	4678.38	1527.74	42982	678.227	171.182	158.963	0.076269	0.00259148
276.961	13.4082	55637.6	142512	7290.15	168877	4084.46	2036.13	38895.7	834.38	154.437	173.412	0.0734119	0.00311682
277.237	13.4168	55009.1	141927	7084.02	170231	4141.07	2149.68	36477.5	828.537	159.334	145.926	0.0752797	0.00265276
277.517	13.4255	48614.2	126171	5656.32	205049	3495.37	2925.88	32204.6	978.343	140.43	162.969	0.0719001	0.0033523
277.796	13.4342	49121.3	126964	5679.49	198729	3556.91	3193.65	32109.1	969.451	143.68	153.132	0.0724107	0.00311742
278.352	13.4515	50955.8	129378	5788.78	187338	3762.06	3530.64	34135.9	932.357	146.635	139.871	0.0738299	0.00274495
278.632	13.4602	50710.8	128208	5733.91	195705	3703.97	3660.44	36083.1	976.496	138.153	138.478	0.0730409	0.00273074
278.908	13.4688	51171.5	130853	5915.24	188604	3847.51	2878.86	33326.9	919.86	149.377	158.559	0.0751884	0.00309858
279.188	13.4775	51591.5	131505	5972.84	182981	3887.62	2790.84	33040.4	925.812	153.835	153.195	0.0753538	0.00296939
279.467	13.4862	47472.3	122282	5191.41	207126	3459.57	3600.77	30258.9	996.192	141.295	151.638	0.0728756	0.00319425
279.744	13.4948	42809.3	108703	4217.34	235676	2970.17	4522.02	28442.9	1225.6	124.669	166.201	0.0693814	0.00388235
280.023	13.5035	42263.9	106100	3874.57	245663	3002.55	4998.06	27957.3	1212.28	122.462	133.181	0.071043	0.00315118
280.303	13.5122	43021	108265	4040.18	238990	3011.15	5854.36	29844.3	1122.45	121.438	113.656	0.0699925	0.00264186
280.872	13.5299	49250.3	121313	5121.94	198229	3440.17	4849.5	36262.5	997.383	131.234	163.021	0.0698508	0.00331005
281.161	13.5389	53167.5	129745	6009.51	175126	3659.41	3062.81	40891.5	855.735	138.759	244.978	0.0688279	0.00460765
281.45	13.5479	52796.6	127001	5819.72	172598	3561.29	2885.44	41109.9	868.35	137.95	311.481	0.0674531	0.00589965
281.739	13.5569	50867.8	122559	5513.46	183333	3320.72	3411.89	40582.9	916.68	128.44	398.911	0.0652813	0.00784211
282.031	13.566	49888.1	118948	5247.59	181350	3171.67	3653.42	40726.8	901.468	126.368	461.296	0.0635757	0.0092466
282.321	13.575	48475.3	116240	4996.29	191367	3088.32	3723.82	38736.5	950.806	124.038	449.194	0.0637091	0.00926646
282.61	13.584	47684.7	114083	4860.4	200117	2964.9	3916.21	39789.4	954.001	116.69	525.536	0.0621772	0.011021
282.899	13.593	48679.1	114100	4981.99	192888	2892.12	3608.88	45266	896.675	112.174	627.407	0.059412	0.0128886
283.191	13.6021	47585.1	115663	5320.15	200122	2825.61	2762.49	42316.1	973.352	114.084	626.19	0.05938	0.0131594
283.481	13.6111	49843.3	118346	5648	187498	2907.09	2128.77	49554.3	916.99	114.741	527.18	0.0583246	0.0105768
283.77	13.6201	49259.3	121914	5890.8	199780	3027.41	2019.79	42746	967.369	119.193	506.756	0.0614587	0.0102875
284.059	13.6291	55111.5	136931	7053.59	167948	3785.24	1407.45	42071.9	828.611	145.293	410.025	0.0686834	0.00743992
284.352	13.6382	60577	148735	8041.02	146114	4519.73	1242.38	43655.9	774.392	161.697	377.723	0.0746113	0.00623543
284.641	13.6472	59448.4	149883	8164.55	150944	4451.47	1395.57	41953.7	800.737	164.362	211.766	0.0748797	0.00356218
284.93	13.6562	61402.6	154753	8661.64	139565	4677.97	1377.78	41498.9	758.036	173.802	221.139	0.0761851	0.00360146
285.219	13.6652	61251.8	153979	8528.26	146583	4631.76	1523.26	43882.3	756.17	164.136	205.458	0.0756183	0.00335433
285.512	13.6743	62006.6	157498	8721.05	139776	4813.87	1403.2	41923.4	657.555	176.327	169.501	0.0776348	0.0027336
285.801	13.6833	62538.3	156626	8528.27	143098	4927.25	1426.45	43398.7	703.597	171.866	166.604	0.0787878	0.00266403
286.09	13.6923	63329.1	158159	8694.34	137339	5049.44	1308	43213.6	695.06	178.26	158.786	0.0797333	0.00250731
286.382	13.7014	62935.2	158390	8882.49	134055	4916.16	1244.53	42320.8	675.407	181.134	177.558	0.0781146	0.00282128
286.672	13.7104	59987.3	148124	7679.4	145989	4623.76	1714.37	41430.4	806.224	169.792	161.828	0.0770791	0.0026977
286.961	13.7194	61097.9	154247	8460.92	143750	4677.78	1580.24	42579.1	718.726	169.254	181.733	0.076562	0.00297446
287.25	13.7284	60596.4	151854	8322.57	147116	4512.52	1698.03	44375	748.584	161.076	206.415	0.0744684	0.0034064
287.543	13.7375	59101.3	149238	8119.82	147710	4284.9	1678.72	42804.7	707.309	161.601	227.957	0.0725009	0.00385705
287.832	13.7465	61471.2	151200	8495.7	137710	4346.68	1774.17	48708.4	692.547	156.552	273.727	0.0707108	0.00445294
288.121	13.7555	66159.8	159174	9328.08	121876	4840.1	1646.86	53963.1	642.642	163.525	245.353	0.0731577	0.00370848
288.41	13.7645	66478	164486	10009.2	119771	4904.59	1338.58	51453.3	572.165	171.663	240.122	0.0737777	0.00361206
288.703	13.7736	68498.4	169447	10581	115363	5264.39	1369.85	52285.8	606.131	175.823	202.621	0.0768542	0.00295804
288.992	13.7826	78951.2	191029	13861.5	79861.2	6448.39	1050.49	60228.2	448.8	201.746	205.531	0.0816757	0.00260327
289.281	13.7916	83773.9	200413	15639	63764.5	6975.21	903.013	62677.3	346.925	217.742	265.445	0.0832623	0.00316858
289.577	13.8008	70877.9	174022	10818.6	103396	5659.61	1101.68	50905.8	501.919	195.977	161.127	0.0798501	0.00227331
289.904	13.811	66488.2	163702	9433.32	121811	5286.04	1196.18	47113.4	609.609	183.93	176.569	0.0795034	0.00265565
290.229	13.8211	65737.6	157066	8854.24	121348	4950.31	1555.27	51347	648.644	170.994	204.792	0.0753041	0.00311529
290.553	13.8312	66672.2	158903	9261.66	118450	4929.13	1599.28	54126.9	634.607	165.711	270.425	0.0739308	0.00405604
290.878	13.8413	67370.4	163607	9860.29	112575	5024.46	1479.67	51847.1	584.535	175.811	241.859	0.0745797	0.00358998
291.203	13.8514	72309	171382	10670.7	100996	5735.88	1341.31	57043	592.593	184.37	168.888	0.0793245	0.00233565
291.527	13.8615	74462.8	179979	12305.3	87667.8	5729.81	1045.13	57625.5	433.096	192.556	313.098	0.0769486	0.00420476
291.852	13.8716	68037.3	167880	10206.4	112651	5229.2	1397.91	50446.3	571.368	183.612	158.141	0.0768578	0.00232432
292.179	13.8818	67405.8	166135	9981.84	114738	5239.57	1378.89	49128.3	610.599	183.734	167.142	0.0777317	0.00247964
292.504	13.8919	74557.3	175304	10880.9	96202.3	6190.64	1265.58	56846.3	563.132	192.569	157.103	0.083032	0.00210715
292.829	13.902	79678.1	185790	12273	81077.1	6856.64	1031.23	60048.2	449.105	206.442	175.3	0.0860542	0.0022001
293.478	13.9222	82656.7	193180	13383.1	73594.2	7298.33	1005.19	62021.4	416.938	214.808	143.085	0.0882969	0.00173107
293.802	13.9323	84398.4	197811	14939.5	66139.9	7174.56	940.995	64253.9	401.66	213.935	232.007	0.0850082	0.00274895
294.13	13.9425	76211.6	186772	12703.9	91423.1	6285.04	989.327	56817.1	443.22	198.231	182.811	0.0824682	0.00239872
294.454	13.9526	73028.9	178271	11711.1	100017	5843.68	999.477	55372.4	519.897	189.32	214.933	0.0800187	0.00294312
294.779	13.9627	73394.2	174411	10439.6	100867	6236.59	1059.14	54154.3	523.383	199.014	119.11	0.0849739	0.00162288
295.104	13.9728	60134.8	149132	7559.89	146890	4697.38	1408.83	41441.3	647.272	172.973	162.421	0.0781143	0.00270095
295.431	13.983	56081	139067	6520.62	170594	4333.44	2066.58	38832.7	817.658	157.483	138.569	0.0772711	0.00247088
295.762	13.9933	53705.9	132583	5851.02	177422	4133.09	2567.53	35935.6	866.61	155.56	134.681	0.0769579	0.00250775
296.093	14.0036	54961.5	134811	6179.98	173934	4206.03	2648.15	38363.3	946.816	152.039	144.712	0.0765268	0.00263297
296.421	14.0138	60078.1	146304	7314.21	149655	4744.54	2219.45	42642.4	873.026	165.059	122.112	0.0789729	0.00203255
296.752	14.0241	60530.2	148272	7564.13	143034	4762.75	1774.74	42373	766.169	171.696	140.609	0.0786839	0.00232296
297.08	14.0343	67600.8	161590	9029.35	118003	5532.15	1468.18	48842.2	691.04	184.356	140.681	0.0818356	0.00208106
297.411	14.0446	71977.6	173255	10749.1	102695	5815.79	1121.41	54096.1	531.128	189.216	197.276	0.0808	0.0027408
297.742	14.0549	76705.3	180868	11894	85536.2	6390.7	1006.9	56903	500.359	204.177	196.538	0.083315	0.00256224
298.07	14.0651	84379.5	194766	13775.6	68180	7420.69	832.756	64149.8	382.929	220.208	159.497	0.0879443	0.00189023
298.401	14.0754	82864.1	190807	13499.7	69751.7	7063.79	858.967	63508.3	411.53	213.843	222.991	0.0852456	0.00269105
298.732	14.0857	85424.3	197044	14357.7	64281	7405.99	889.984	65099.6	352.432	218.65	221.292	0.0866966	0.00259051
299.059	14.0959	81106.4	191638	13291.1	77049.7	7032.47	884.32	59183.7	416.51	212.091	219.308	0.0867068	0.00270396
299.39	14.1062	78029.5	187811	12783.3	82952.4	6620.12	845.035	55475.6	428.475	211.915	211.331	0.0848413	0.00270835
299.721	14.1165	69875.3	172492	10466.8	109937	5756.72	1073.9	48002.3	551.569	195.055	180.628	0.0823856	0.002585
300.049	14.1267	57157.6	142815	6871.83	164973	4553.22	1794.92	38047.5	832.262	165.709	124.769	0.0796608	0.0021829
300.345	14.1359	55485.1	136573	6197.99	171678	4375.56	2247.24	36786.4	872.66	159.281	148.847	0.07886	0.00268265
300.611	14.1442	52032.2	129685	5617.11	192664	4025.67	2880.79	34685.9	962.975	147.153	138.932	0.0773689	0.00267013
300.878	14.1525	49274.9	121764	5016.43	203764	3702.96	3505.71	32917.5	1084.49	139.262	162.298	0.075149	0.00329373
301.148	14.1609	50224.6	127162	5409.1	198351	3837.53	3638.14	32445.8	953.312	144.974	134.376	0.0764074	0.0026755
301.415	14.1692	53105.8	131600	5762.26	182591	4102.04	3190.03	35152.6	922.614	150.591	147.562	0.0772428	0.00277865
301.681	14.1775	64284	152753	7972.03	132640	5109.47	2196.38	47152.8	769.774	167.394	183.677	0.0794828	0.00285728
301.951	14.1859	70792.5	166538	9803.69	104556	5787	1443.62	52555.1	628.107	186.032	214.973	0.0817459	0.00303666
302.241	14.1949	62245.2	153244	8056.04	137223	4937.32	1633.68	43414.1	686.096	175.423	149.522	0.0793205	0.00240214
302.565	14.205	57413.5	140242	6831.62	162043	4355.05	2233.1	41740.3	905.839	155.013	155.349	0.0758541	0.00270579
302.893	14.2152	62340.8	151961	8067.4	139812	4854.25	1952.55	45539.3	777.292	165.56	172.776	0.0778663	0.00277148
303.221	14.2254	61605.9	153593	8423.06	138537	4700.06	1904.93	44309.4	727.054	167.183	183.908	0.0762924	0.00298523
303.545	14.2355	63472.5	155069	8314.5	136438	5030.81	1733.41	46074.6	727.575	170.74	147.979	0.0792597	0.00233138
303.873	14.2457	69762.1	169643	10385	109084	5581.22	1359.51	51502.5	599.653	183.341	214.566	0.0800036	0.00307568
304.198	14.2558	77036.3	181739	11828.7	88708.8	6474.77	1129.88	58699.3	493.33	197.262	184.976	0.0840483	0.00240115
304.525	14.266	79534	188758	13110.2	79499.1	6658.14	903.072	60735.7	413.292	204.942	219.857	0.0837145	0.00276432
305.505	14.2965	69757.8	173849	11332.9	102994	5317.46	1250.88	51798.2	494.34	185.552	264.718	0.0762274	0.00379482
305.83	14.3066	65469.9	163804	9707	121653	4986.29	1597.2	47367.7	606.437	177.913	176.232	0.0761616	0.00269181
306.158	14.3168	57396.5	138425	6663	158626	4200.6	2664.63	44383	839.774	150.978	141.602	0.0731855	0.00246709
306.466	14.3264	71513.9	161146	9062.97	97859.2	5611.09	1898.97	57635.3	610.552	184.456	141.979	0.0784616	0.00198534
307.064	14.345	87368.8	198759	15329.6	54800	7102.09	1481.89	72241.8	322.11	213.391	178.316	0.0812887	0.00204096
307.36	14.3542	84681.1	190378	13584	61628.7	6883.62	1475.5	70125.8	362.911	208.353	174.113	0.0812887	0.00205611
307.659	14.3635	90031.5	203824	16497.8	49887.3	7347.67	1212.02	75845.5	286.373	217.057	203.103	0.0816122	0.00225591
307.957	14.3728	88438.3	197121	14928.4	55514.8	7173.29	1450.2	78040.6	321.215	205.737	167.123	0.0811107	0.00188972
308.256	14.3821	81649.3	183454	12850.4	66209	6302.82	1580.56	72220.7	382.093	195.821	189.286	0.0771938	0.00231828
308.555	14.3914	62455.9	149419	7697.01	135788	4733.77	1852.95	46922.4	688.78	167.459	164.519	0.0757938	0.00263416
308.851	14.4006	63780.8	150023	7671.94	134563	4994.14	1642.8	47746.8	743.046	169.074	175.217	0.0783016	0.00274718
309.149	14.4099	62548.8	149186	7581.44	138569	4897.62	1688.12	46418.2	768.346	171.142	115.712	0.0783007	0.00184995
309.448	14.4192	57047	140154	6736.95	163389	4342.08	1983.45	40744.4	839.068	158.72	136.193	0.0761141	0.00238738
309.747	14.4285	52299.6	126677	5455.45	183100	3856.5	2690.18	37250.4	969.415	147.525	135.437	0.0737387	0.00258963
310.043	14.4377	52947.9	123915	5196.46	179863	3825.76	2835.31	40874.5	962.185	141.901	150.25	0.0722551	0.0028377
310.342	14.447	54604.8	129112	5718.04	167832	3916.74	2874.45	42185.1	881.838	146.429	154.235	0.0717289	0.00282458
310.64	14.4563	54091.3	125193	5524.29	167987	3656.17	3592.49	45171.7	899.308	134.398	255.198	0.0675925	0.0047179
310.939	14.4656	55430.7	130654	6100.84	156925	3719.35	3938.64	44623.6	792.286	137.79	367.601	0.0670992	0.00663172
311.235	14.4748	60681.4	137618	7064.29	131091	3902.82	2862.91	58595.2	657.801	138.581	372.989	0.0643167	0.00614669
311.816	14.4929	61116.8	142850	7413.99	132810	4298.26	2063.15	49842.3	737.309	156.185	286.482	0.0703286	0.00468746
312.106	14.5019	63111.6	151959	8491.1	124264	4521.22	1803.31	49696.5	671.175	167.28	206.261	0.0716385	0.00326819
312.398	14.511	63948.2	153810	8567.16	125871	4673.35	1887.83	50786.1	678.746	166.28	172.927	0.0730802	0.00270418
312.687	14.52	62417.5	152253	8412.84	132749	4530.5	2074.18	49388.3	704.735	162.631	154.708	0.0725839	0.00247861
312.977	14.529	61305	150459	8268.94	141481	4416.58	2046.64	49280.9	745.535	155.857	169.068	0.0720427	0.00275782
313.269	14.5381	64317.1	158391	9358.46	126760	4622.17	1832.78	52139.8	651.926	161.7	203.22	0.0718653	0.00315966
313.593	14.5471	69362.4	168448	10535.1	109455	5159.92	1690.2	56984.2	562.44	170.775	195.668	0.0743906	0.00282094
313.927	14.5561	68462.4	165849	10111.3	108980	5115.19	1655.79	54359.7	572.622	176.81	168.896	0.0747153	0.00246699
314.264	14.5652	69273.3	169373	10557.8	109215	5243.42	1581.2	55071.1	573.161	177.614	146.041	0.0756918	0.00210819
314.597	14.5742	69637.3	172101	10758.9	107475	5389.05	1582.48	53072.3	548.942	184.538	122.258	0.0773875	0.00175563
314.931	14.5832	65788.1	161100	9418.95	122717	4895.22	1949.11	51968.2	635.222	167.615	160.681	0.0744088	0.00244239
315.268	14.5923	69080.1	167107	9956.19	115322	5356.39	1742.84	54924.5	598.56	172.899	145.905	0.0775388	0.00211212
315.601	14.6013	78490.7	184396	12405	85055.8	6477.7	1213.75	63030.8	481.37	193.656	165.582	0.0825283	0.00210957
315.935	14.6103	82386	192901	13797.8	69904.3	6897.48	1072.84	63676.3	380.37	211.742	177.297	0.0837216	0.00215202
316.268	14.6193	70995.1	172729	10758	108199	5619.68	1223.98	55028.2	553.183	182.82	158.997	0.0791558	0.00223954
316.605	14.6284	65891.3	162250	9585.15	125423	5018.65	1511.27	50756	674.713	170.305	171.499	0.0761655	0.00260276
316.939	14.6374	66739.4	166492	10104.1	116562	5125.22	1413.54	48143.3	600.883	182.34	179.48	0.0767946	0.00268927
317.272	14.6464	71271.1	173282	10935	104666	5710.22	1309.97	52759.6	604.368	186.908	187.661	0.0801198	0.00263306
317.609	14.6555	85028.8	199312	15804.7	60293.4	6993.2	992.085	67570	369.264	213.801	236.724	0.0822451	0.00278405
317.943	14.6645	99183.4	228836	23255.2	35406.9	8432.28	912.023	83045.2	226.083	229.931	257.882	0.0850171	0.00260005
318.276	14.6735	101887	239825	25908.6	32045.4	8847.1	829.172	82914.5	181.198	237.988	246.897	0.0868321	0.00242323
318.613	14.6826	100449	235175	24679.2	34836.3	8610.05	770.554	83394.4	197.964	231.006	284.5	0.0857154	0.00283227
318.947	14.6916	97586.1	228707	21877.3	40189.8	8498.82	800.226	78143	208.893	232.083	249.771	0.0870904	0.0025595
319.281	14.7006	85582.7	203107	16314.3	61394	7171.97	964.494	66336	379.546	216.34	201.752	0.0838017	0.00235739
319.614	14.7096	81051.4	197160	14801.5	74725.8	6785.53	980.177	60327	418.566	209.582	192.143	0.0837188	0.00237063
319.951	14.7187	80530.5	193019	14117.6	77949.5	6740.79	1044.97	61344.9	478.748	203.287	194.295	0.0837048	0.00241269
320.285	14.7277	83676.3	198382	15049.9	70036.7	7021.29	955.63	65941.4	388.551	204.641	246.23	0.0839102	0.00294265
320.618	14.7367	89918.8	208770	16774.3	56033.8	7848.02	877.06	71568.4	307.373	219.859	198.006	0.087279	0.00220205
320.955	14.7458	87939.9	197952	15166.6	56967.9	7549.19	968.804	72050.4	378.404	216.277	204.546	0.0858448	0.00232597
321.289	14.7548	90161.5	208080	16894.4	54272.4	7823.23	882.057	72630.4	310.028	219.61	214.073	0.086769	0.00237433
321.622	14.7638	89033.5	204774	16162.7	57090.5	7688.56	933.239	71192.5	329.85	216.132	235.205	0.0863559	0.00264176
321.959	14.7729	86412	201147	15049.3	63059.1	7601.1	844.741	66205.3	337.941	220.054	200.393	0.0879635	0.00231904
322.326	14.7828	63454.3	156370	8228.18	138673	5222.04	1317.3	43572.8	669.977	179.021	140.236	0.082296	0.00221003
322.697	14.7928	52672	136499	6488.15	188766	4105.1	1744.71	33199.9	960.67	156.849	152.17	0.0779369	0.00288901
323.067	14.8028	51371	132195	6050.51	195832	3957.25	1991.94	32627.1	987.646	151.686	157.332	0.0770327	0.00306265
323.438	14.8128	53181.5	136355	6316.45	182974	4162.85	1941.9	33551.9	895.055	161.014	119.613	0.0782762	0.00224915
323.808	14.8228	54342.1	136924	6442.17	180203	4269.05	1660.44	35049.7	937.082	157.862	193.602	0.0785587	0.00356266
324.179	14.8328	63580.1	155208	8432.17	136406	5122.85	1318.95	44588.6	784.056	174.199	197.828	0.0805733	0.00311147
324.549	14.8428	55174.2	141015	6907.09	171469	4368.91	1743.78	35040	911.701	163.629	168.784	0.079184	0.00305911
324.92	14.8528	61896.4	151881	7848.56	141571	5101.8	1534.13	40749.6	804.864	177.305	173.03	0.0824248	0.00279549
325.29	14.8628	61522.4	150862	7532.81	146502	5164.47	1601.31	41056.5	795.369	177.878	105.867	0.0839445	0.00172079
325.661	14.8728	47603.4	123128	5298.96	219043	3583.29	2802.42	30255.2	1107.92	137.372	182.959	0.0752739	0.00384341
326.031	14.8828	44361.8	114654	4609.27	240176	3338.11	3200.51	27813.6	1310.3	130.951	140.259	0.0752473	0.0031617
326.402	14.8928	55404.8	136020	6238.92	174189	4426.66	2270.9	36643.7	1029.99	157.228	153.05	0.0798967	0.00276239
326.772	14.9028	55853.3	141393	6819.99	164040	4414.82	2192.81	35716.4	889.273	168.21	110.72	0.0790432	0.00198233
327.143	14.9128	48378	124944	5370.07	208315	3687.93	3424.72	29988.1	1110.17	144.128	128.98	0.0762315	0.00266609
327.513	14.9228	44360.7	116906	4790.81	235646	3270.03	4447.68	26991.4	1187.83	130.68	151.915	0.0737146	0.00342454
327.884	14.9328	43847.6	115483	4667.52	238412	3223.24	4126.58	26349.6	1174.26	130.984	160.362	0.07351	0.00365727
328.254	14.9428	44318.9	116838	4696.46	230217	3383.55	3863.42	25329.9	1216.23	140.859	114.073	0.0763456	0.00257391
328.625	14.9528	49753.5	128206	5517.49	201759	3906.39	3058.85	29596.2	1036.11	151.069	135.464	0.0785148	0.00272269
328.995	14.9628	59420.3	145013	6950.48	154772	4914.66	2078.54	38723.6	899.881	170.557	129.259	0.0827102	0.00217533
329.362	14.9727	62455.4	153268	7968.32	135085	5122.46	1730.47	40684.5	761.007	181.886	154.08	0.0820179	0.00246704
329.729	14.9826	46245.8	118506	4848.97	222619	3450.01	3860.91	29334.7	1171.2	135.069	141.402	0.0746015	0.00305762
330.096	14.9925	42594	112361	4449.92	240680	3098.25	5155.02	25760	1248.59	129.407	122.01	0.0727392	0.00286449
330.459	15.0023	42019.9	106905	3940.66	247258	3048.41	6019.76	26220.7	1353.24	123.734	123.762	0.0725467	0.00294532
330.826	15.0122	40928	102629	3620.25	258166	2942.58	6852.06	26348.1	1411.32	116.666	131	0.0718964	0.00320074
331.193	15.0221	45256.5	113697	4294	223120	3420	5923.02	28063.1	1231.31	135.438	94.8234	0.0755692	0.00209524
331.556	15.0319	45771.6	113531	4510.3	215705	3206.61	5316.14	30641	1193.17	128.317	205.198	0.0700567	0.00448307
331.923	15.0418	51209.4	125622	5705.74	183150	3553.42	3242.89	35451.1	960.694	134.698	667.304	0.06939	0.0130309
332.289	15.0517	53480.8	131828	6581.26	169703	3646.02	2335.24	37837.1	916.136	136.76	1201.8	0.0681745	0.0224716
332.656	15.0616	56095.2	141806	7780.02	153480	3818.95	1782.15	38836.3	750.818	146.802	1344.22	0.0680798	0.0239633
333.019	15.0714	56914.1	145572	8208.3	149983	3905.88	1558.69	38318.8	707.836	151.779	1338.72	0.0686277	0.0235219
333.386	15.0813	56929.4	146495	8469.29	152695	3827.76	1435.47	40015.2	711.066	148.017	1264.61	0.067237	0.0222137
333.753	15.0912	52858.7	135692	7230.4	169257	3605.17	1282.39	35861.2	879.753	147.962	897.612	0.0682039	0.0169813
334.12	15.1011	55508.5	140667	7994.23	146004	3615.9	924.256	41346.1	675.277	156.155	847.558	0.0651413	0.015269
334.483	15.1109	55185.6	135375	7506.03	152391	3474.75	994.025	44752.8	759.143	142.039	1301.41	0.0629648	0.0235824
334.83	15.1204	57081.2	138172	8012.46	139342	3417.96	1181.16	51764.2	674.387	139.049	1096.85	0.0598789	0.0192157
335.055	15.1293	56982.2	139084	8115.34	147034	3443.28	1256.08	51732.5	737.329	134.566	1058.69	0.0604273	0.0185793
335.281	15.1382	58539.6	147622	8796.42	144297	3907.95	1340.1	44931.6	799.954	149.838	731.573	0.0667574	0.0124971
335.729	15.1559	61101.2	153738	8905.33	138490	4346.46	1794.49	45450.8	732.838	159.786	297.83	0.0711354	0.00487437
335.954	15.1648	55691.9	144235	7603.52	163602	4080.76	2046.75	37446.4	842.689	157.848	216.101	0.0732739	0.00388029
336.177	15.1736	48803.6	127142	5946.15	204171	3467.2	2369.73	32234.5	1032.92	138.543	276.896	0.071044	0.00567368
336.402	15.1825	48761.5	127488	6011.27	203673	3443.03	2471.07	32234.7	1034.92	138.114	277.744	0.0706097	0.00569597
336.627	15.1914	48835.3	124867	5782.05	206875	3404.07	2745.24	34397.5	1113.78	131.057	292.54	0.069705	0.00599035
336.85	15.2002	50825.1	129458	6191.85	188008	3572.97	2647.33	34891	1039.18	140.636	295.854	0.0702993	0.00582102
337.075	15.2091	47521.3	125680	5905.92	210799	3348.73	2611.96	30707.9	1094.13	135.674	295.442	0.0704679	0.00621705
337.301	15.218	48017.7	125121	5849.63	207470	3405.06	2481.35	31789.3	1140.18	136.017	290.528	0.0709125	0.00605044
337.526	15.2269	48915.4	129762	6558.65	192726	3344.26	2244.46	32110.6	1041.65	140.119	428.832	0.0683683	0.00876681
337.749	15.2357	50043	132049	6512.61	194215	3580.82	2128.13	32243.7	1003.27	144.009	317.794	0.0715549	0.00635041
337.974	15.2446	48412.4	126553	5996.74	205364	3415.93	2316.75	31837.6	1113.91	137.821	292.425	0.0705589	0.00604028
338.199	15.2535	47419.9	125211	5882.65	209345	3328.1	2168.11	30870.8	1060.83	138.115	283.283	0.0701835	0.00597394
338.422	15.2623	48413.9	126443	5934.01	206204	3437.75	2242.46	31744.8	1079.48	138.38	286.687	0.0710075	0.00592158
338.873	15.2801	44925.2	116867	5146.22	235350	3125.8	2549.07	30250.6	1226.7	122.298	400.227	0.0695779	0.00890875
339.096	15.2889	47703.5	122588	5486.74	213920	3447.3	2197.88	30855.6	1158.39	135.831	325.546	0.0722651	0.00682437
339.321	15.2978	45419	118197	5242.87	224541	3190.02	2378.38	29498.9	1230.63	130.393	334.877	0.0702352	0.00737306
339.546	15.3067	45920.9	121794	5662.91	222165	3188.36	2194.06	30033.9	1142.39	130.719	363.027	0.0694314	0.00790549
339.769	15.3155	45553.3	120110	5535.85	228100	3162.84	2104.99	30254.7	1214.9	127.38	386.162	0.0694317	0.00847714
339.994	15.3244	52674.7	136169	6941.53	181300	3796.68	1891.96	34842.6	985.951	146.006	438.928	0.0720778	0.0083328
340.219	15.3333	50352.3	131825	6679.57	184670	3526.56	1639.45	32446.7	995.931	147.568	479.178	0.0700377	0.0095165
340.442	15.3421	50468	133325	6682.58	193348	3601.82	1800.92	32195.5	958.21	143.762	465.326	0.0713684	0.00922021
340.668	15.351	51088.1	134995	6989.44	186971	3602.98	1619.64	33294.9	952.5	145.262	495.566	0.0705248	0.00970022
340.893	15.3599	52505.7	137854	7303.84	181125	3720.17	1640.62	34530.4	954.956	145.382	579.424	0.0708527	0.0110355
341.341	15.3776	54383.7	141706	7605.18	172221	3923.41	1634.66	35738.7	928.529	150.904	475.953	0.072143	0.00875175
341.566	15.3865	54318.7	142331	7645.16	173747	3945.24	1770.73	35416.4	925.919	149.934	472.138	0.0726313	0.008692
341.791	15.3954	57221.7	151956	8859.63	151708	4170.44	1492.82	36283.3	776.35	163.664	506.557	0.0728822	0.00885253
342.014	15.4042	54779.8	145356	8156.07	167190	3903.24	1664.19	35453.6	869.497	152.376	562.441	0.0712532	0.0102673
342.24	15.4131	56365	147567	8268.81	162794	4091.4	1631.76	37001.4	847.415	153.722	551.118	0.0725877	0.00977767
342.465	15.422	57235.2	148092	8342.65	155810	4159.4	1609.15	37992.3	850.558	156.61	541.222	0.0726719	0.0094561
342.688	15.4308	55189.1	145000	7943.51	166886	4021.62	1591.04	35252.5	860.142	154.678	546.523	0.0728697	0.00990272
342.913	15.4397	62149.8	158412	9311.73	135287	4752.04	1379.33	41155.8	719.235	170.255	475.577	0.076461	0.0076521
343.138	15.4486	59533.9	156272	8977.98	143956	4536.3	1296.44	36631.2	684.874	174.353	421.051	0.076197	0.00707246
343.361	15.4574	66783.9	168419	10497.7	118671	5218.58	1294.19	45588.1	612.303	177.726	446.715	0.0781413	0.00668896
343.586	15.4663	70612.6	174840	11426	104828	5601.55	1242.55	49750.2	580.609	183.852	420.505	0.0793279	0.0059551
344.037	15.4841	68115	173470	11268.4	112347	5279.12	1420	46818.8	577.371	181.099	360.859	0.077503	0.0052978
344.26	15.4929	70590.6	178678	11537	102532	5673.72	2062.52	47152.1	507.79	188.434	276.828	0.080375	0.0039216
344.485	15.5018	68670.2	176300	11279.9	111723	5485.86	1478.24	45577.5	547.096	189.444	219.689	0.079887	0.00319919
344.71	15.5107	64086.4	165396	9991.81	128121	4983.49	1622.68	42844.4	654.628	177.842	227.929	0.077762	0.00355658
344.933	15.5195	63692.4	165597	9956.98	128131	4968.78	1582.1	41510.6	623.108	180.956	225.681	0.0780121	0.0035433
345.158	15.5284	63069.9	165185	9941.2	132525	4878.51	1645.45	41921.4	612.912	175.491	235.807	0.0773508	0.00373882
345.384	15.5373	60462.4	158884	9084.7	144711	4644.39	1796.41	39927.3	662.415	170.432	198.831	0.0768146	0.0032885
345.606	15.5461	60217.1	157078	8882.51	144113	4667.64	1975.66	39220.2	741.416	171.658	181.101	0.0775136	0.00300746
345.832	15.555	59032.5	155806	8892.74	148233	4401.3	1969.46	39155.9	697.489	166.305	215.604	0.0745573	0.0036523
346.057	15.5639	57940.1	151990	8328.58	157704	4387.47	2214.12	38196.3	783.032	161.451	198.006	0.0757243	0.00341743
346.28	15.5727	60178.6	158165	9225.94	142811	4508.81	1914.59	39699.6	699.276	168.093	255.539	0.0749239	0.00424634
346.505	15.5816	63458	163556	9678.61	132674	4897.33	1690.66	42906.4	652.879	174.477	213.461	0.0771744	0.00336382
346.73	15.5905	62446.6	162532	9515.83	137097	4815.95	1873.77	41844.2	654.915	172.328	197.596	0.077121	0.00316424
346.953	15.5993	66912.6	169223	10297.4	118414	5246.84	1579.16	46588.7	573.191	181.456	205.811	0.0784133	0.00307582
347.178	15.6082	74952.5	187198	13016.5	90672.5	6067.51	1129.06	53359.7	435.881	198.378	254.62	0.0809514	0.00339709
349.198	15.688	68109.1	172387	10803.2	113676	5336.99	1599.49	47846.8	569.834	183.456	191.751	0.0783594	0.00281535
349.424	15.6969	66144.5	170172	10443.6	119963	5173.56	1672.01	44891.2	577.451	183.955	167.258	0.078216	0.00252868
349.649	15.7058	65945.9	168822	10416.8	120752	5087.46	1793.15	45965.7	612.935	178.945	182.123	0.077146	0.0027617
349.872	15.7146	69669.2	175894	11300.6	109125	5503.26	1718.98	49228.2	572.336	184.335	187.122	0.0789913	0.00268587
350.097	15.7235	69916.6	177443	11484.7	106939	5558.7	1564.81	48257.4	543.465	189.47	187.386	0.0795047	0.00268014
350.322	15.7324	65467.5	168675	10461.6	121805	5028.7	1841.84	45436.8	624.119	178.563	175.978	0.0768121	0.00268801
350.548	15.7413	66393.2	170679	10718.1	114815	5176.67	1688.62	44567.6	607.899	187.553	174.809	0.0779698	0.00263293
350.77	15.7501	68068.6	174327	11213.6	111439	5313.9	1735.04	46846.2	586.095	185.77	182.003	0.0780668	0.00267382
350.996	15.759	70102.7	177212	11662.5	107967	5480.23	1616.03	50624.9	570.107	182.227	207.296	0.0781744	0.00295704
351.221	15.7679	72396.2	180970	12245.5	97640.7	5736.9	1524.01	52184.8	532.871	189.69	217.276	0.0792432	0.0030012
351.444	15.7767	70789.4	178600	11712.8	102053	5591.64	1625.53	49194.4	521.172	190.726	206.165	0.0789898	0.00291237
351.669	15.7856	69242.9	175470	11391.2	105952	5358.85	1887.1	48186.2	549.764	185.075	228.245	0.077392	0.00329629
351.894	15.7945	68734.8	175308	11322.1	108305	5344	2001.8	47654.2	563.271	184.624	193.767	0.0777481	0.00281905
352.117	15.8033	67691.4	171175	10692.7	116400	5267.4	2206.19	48346.7	623.523	175.195	199.845	0.0778148	0.00295229
352.342	15.8122	70887.4	178852	11526.4	104548	5659.32	2045.21	49825.6	534.055	187.417	155.294	0.0798353	0.00219071
352.568	15.8211	72501.2	182877	12352.5	96795.8	5708.17	1736.26	51603.7	477.184	190.745	201.223	0.0787321	0.00277544
352.79	15.8299	71385.9	181562	12157.5	100334	5605	1604.59	49807.7	481.365	191.079	210.012	0.0785169	0.00294193
353.016	15.8388	68721.7	175909	11296.2	109375	5333.58	1881.88	47661.9	509.299	183.777	219.449	0.0776114	0.0031933
353.241	15.8477	67391.7	172904	10727.6	112725	5279.75	2087.15	45189.1	542.634	186.965	165.232	0.0783443	0.00245182
353.464	15.8565	62830.3	162636	9284.5	133315	4897.86	2683.14	40988.2	646.095	174.823	159.343	0.0779538	0.00253609
353.689	15.8654	63909.1	164189	9686.23	129502	4858.07	2704.76	43904.9	637.056	169.361	204.332	0.0760153	0.00319722
353.914	15.8743	66709.1	172526	10804.3	114447	5198.94	2068.86	44519.2	557.869	185.476	177.848	0.0779345	0.00266602
354.14	15.8832	63116.3	161542	9261.72	131438	4859.2	2506.48	42348	639.667	171.803	210.517	0.076988	0.00333538
354.362	15.892	67181.8	171934	10699.6	113179	5235.86	2041.68	44599.3	568.037	185.566	206.383	0.0779358	0.00307201
354.588	15.9009	72971.8	181486	12323	92098	5797.21	1611.22	50875.6	517.617	195.952	238.379	0.0794446	0.00326672
354.853	15.9114	92219.9	217950	19341.4	48695.8	8016.8	877.255	69288.5	306.094	231.423	222.118	0.0869314	0.00240857
355.122	15.922	88643.5	212561	17703.3	56049	7699.49	868.284	64978.3	313.278	228.668	208.757	0.0868591	0.00235501
355.388	15.9325	79501	196048	14408.6	77194.3	6588.96	1136.84	56143.3	398.07	210.502	219.353	0.0828789	0.00275912
355.656	15.9431	78607.9	193699	13858.5	80866.7	6568.14	1222.24	55770.1	427.821	208.844	170.435	0.0835557	0.00216817
355.922	15.9536	83595.7	201843	15106.4	68315.3	7159.69	1171.08	61310.6	351.195	217.29	156.085	0.0856466	0.00186714
356.19	15.9642	82613.2	199644	14663.6	70649.4	7035.72	1162.05	60173.4	348.583	215.175	177.738	0.0851645	0.00215145
356.456	15.9747	73232.2	183149	12211.4	94364.7	5941.02	1473.81	50644.3	476.34	198.988	188.706	0.0811258	0.00257682
356.719	15.9851	67255.7	170464	10398.1	116412	5286.12	1689	46383.2	567.422	184.587	169.515	0.0785973	0.00252045
356.977	15.9953	64866.9	164665	9738.16	125053	5004.71	1818.69	44899.2	617.656	177.373	189.257	0.0771534	0.00291761
357.238	16.0056	71503.8	178839	11401.9	100291	5856.29	1343.07	48436.5	494.604	200.697	163.065	0.0819018	0.00228051
357.499	16.0159	80371.2	194262	14238.3	73437.7	6622.59	1113.8	58883.7	397.979	211.475	205.965	0.0824	0.00256267
357.757	16.0261	87252.3	206168	16576.9	59022.1	7448.64	991.298	66687.7	353.134	220.179	194.079	0.085369	0.00222434
358.018	16.0364	89598.4	213550	18487.7	53320.2	7560.65	816.478	69079.1	298.134	222.884	264.458	0.0843837	0.00295159
358.278	16.0467	88903.2	209270	17133.9	55597.8	7685.41	914.747	67357.3	323.371	224.384	221.677	0.086447	0.00249346
358.514	16.056	79456.1	190703	13852.4	76273.3	6528.63	1222.56	57824.2	466.186	204.371	289.496	0.0821664	0.00364347
358.704	16.0635	64377.5	161335	9372.33	128047	4948.53	1880.49	44766.4	683.738	172.814	233.981	0.0768673	0.00363451
358.894	16.071	65877.9	165771	9938.75	119685	5094.19	1839.46	45595.7	640.014	180.322	187.809	0.0773278	0.00285087
359.086	16.0786	68690.6	173611	11077.6	108362	5343.43	1753.21	47781.7	563.834	185.63	211.142	0.0777898	0.00307382
359.276	16.0861	67230.5	169264	10256.1	113302	5188.9	1921.6	46921.6	528.762	182.832	199.004	0.0771807	0.00296003
359.468	16.0937	68131.1	169798	10297.3	112237	5373.63	2004.79	47874.8	584.32	182.825	179.66	0.0788718	0.00263697
359.658	16.1012	67791.1	168452	10313.5	111080	5240.62	1939	47829	606.934	182.431	201.965	0.0773054	0.00297922
359.848	16.1087	66921.9	167532	10129.3	113436	5175.91	2000.05	46903.3	594.63	183.025	173.312	0.0773425	0.00258976
360.04	16.1163	68625.4	171236	10581	108079	5334.24	1987.19	48859.9	555.393	185.301	163.143	0.0777298	0.0023773
360.23	16.1238	69237.3	174383	11278.1	105476	5328.93	1804.48	49308.8	548.448	184.607	214.905	0.0769662	0.00310389
360.423	16.1314	68576.2	171227	10503	113793	5434.75	1757.99	49429.3	595.421	182.477	146.883	0.0792513	0.0021419
360.612	16.1389	76717.4	184755	12700.9	84905.8	6144.65	1368.24	58218.4	469.056	196.154	203.307	0.0800945	0.00265008
360.812	16.1468	81021.4	194682	14298.3	73132.2	6657.47	1245.55	61713.8	396.208	206.191	190.245	0.0821693	0.00234809
361.05	16.1562	77798.9	189436	13426.1	82023.3	6296.96	1304.56	58422.1	433.988	199.645	200.138	0.0809388	0.0025725
361.291	16.1657	70758.5	174027	11168.2	101548	5455.71	1498.44	53137.6	522.567	186.043	192.695	0.0771032	0.00272328
361.529	16.1751	71083.3	173915	10738.1	103622	5715.04	1550.45	51389.2	545.723	191.59	138.866	0.0803991	0.00195357
361.767	16.1845	70102.5	173382	10999	104924	5455.5	1786.73	50972.6	562.121	183.71	205.648	0.0778217	0.00293354
362.007	16.194	78357.6	190301	13724.4	79278.6	6331.07	1475.56	59243.9	458.699	200.069	180.15	0.0807972	0.00229907
362.245	16.2034	75302	186845	13145.1	87603.8	6029.62	1391.11	54489.6	480.575	198.525	195.973	0.0800725	0.00260249
362.486	16.2129	74145	185111	12757.9	89966	6000.63	1440.45	52061.4	499.822	201.773	165.564	0.0809311	0.00223298
362.724	16.2223	78999.2	192179	13743.1	77801.1	6605.11	1194.07	56598.9	422.669	209.072	212.486	0.0836099	0.00268972
362.964	16.2318	69858.6	170562	10183.6	107795	5801.54	1436.13	48761.6	594.837	193.625	144.977	0.0830469	0.00207529
363.202	16.2412	64429.6	157687	8680.7	126589	5013.62	2137.62	47187.4	644.116	172.097	165.757	0.0778155	0.00257268
363.443	16.2507	66320.1	164905	9648.45	115762	5155.71	2050.29	47573.8	568.975	180.999	155.839	0.0777398	0.0023498
363.68	16.2601	63049.1	157102	8884.71	127361	4751.71	2352.32	45510.7	677.95	171.012	171.364	0.0753652	0.00271795
363.921	16.2696	60832.7	152603	8214.57	139221	4678.26	2256.44	41487.8	726.694	169.045	199.044	0.0769036	0.00327199
364.159	16.279	55564.9	139976	6820.62	162833	4172.86	3102.47	37570.5	832.477	155.723	182.471	0.0750988	0.00328394
364.382	16.2878	56749.8	139479	6652.81	156090	4262.39	3754.76	40148.8	812.807	155.126	151.82	0.0751086	0.00267524
364.597	16.2963	65224.6	156476	8474.94	123695	5014.5	2780.34	50789	644.692	167.345	131.392	0.0768805	0.00201446
364.815	16.3049	72796.4	175896	11279.1	94531.2	5682.14	1786.92	56690.9	476.942	186.002	180.325	0.0780553	0.00247711
365.032	16.3135	64463.2	159411	9068.37	122642	4865.44	2480.72	47503.8	615.755	170.795	181.225	0.0754762	0.00281129
365.25	16.3221	66782.7	166506	10149.7	113455	5074.84	2215.89	49348.1	592.268	175.843	188.94	0.0759903	0.00282917
365.465	16.3306	61352.5	150967	8031.23	138341	4629.01	2813.64	44907.6	756.594	162.595	161.186	0.0754493	0.00262721
365.683	16.3392	70195.5	166139	9770.6	103054	5524.75	2127.08	53416.1	584.736	182.012	172.187	0.0787052	0.00245296
365.901	16.3478	78137.1	184725	12160.5	83028.5	6481.79	1454.65	59793.7	426.186	199.463	161.219	0.082954	0.00206329
366.116	16.3563	72595.8	173120	10785.2	98289.4	5663.24	1489.57	56286	494.078	184.715	215.329	0.0780107	0.00296613
366.333	16.3649	74638.7	175937	10696.1	95737.1	6236.81	1814.56	55716.1	521.652	190.194	164.161	0.08356	0.00219941
366.551	16.3735	73731.2	175166	10833.1	95203	6023.75	1718.51	55422.5	514.839	190.091	175.812	0.0816987	0.0023845
366.769	16.3821	64158.3	156810	8721.56	126342	4841.85	2346.19	48030.6	654.148	168.09	180.848	0.0754673	0.00281877
366.984	16.3906	62327.4	149373	7707.55	139227	4707.78	2925.01	48055.1	747.162	157.152	169.508	0.0755332	0.00271965
367.202	16.3992	76338.6	180075	11474.4	86527.7	6336.02	1611.22	57190.6	469.619	198.151	165.58	0.0829989	0.00216902
367.419	16.4078	78747.2	186012	12243.7	83098.1	6567.89	1377.37	60396.6	403.329	198.63	179.181	0.0834048	0.00227539
367.635	16.4163	74886.8	178798	11432.8	91642.4	6121.51	1301.52	56375.8	480.95	196.331	167.628	0.0817435	0.00223841
367.852	16.4249	76739.2	181622	11701.6	84829.6	6399.34	1458.21	56903.9	463.251	203.474	142.857	0.0833907	0.0018616
368.07	16.4335	69942	166526	9785.31	108373	5499.8	1879.28	54195.7	588.161	178.626	159.799	0.0786338	0.00228473
368.288	16.4421	65943.7	158523	8938.89	116445	5000.36	2035.51	49944.5	636.842	176.336	153.233	0.0758277	0.00232369
368.503	16.4506	62030.8	151140	7996.73	134166	4708.32	2132.58	45395.9	721.627	169.904	140.808	0.0759029	0.00226998
368.72	16.4592	59304	143805	7191.03	147634	4404.83	2787.1	45041	802.916	158.267	119.709	0.0742755	0.00201856
368.938	16.4678	65564	159193	9120.48	114767	4922.79	2189.11	49007.2	621.568	176.891	165.936	0.0750837	0.00253091
369.242	16.4798	74457	176968	10803.5	91710	6190.7	1583.53	54124.7	463.743	201.207	130.802	0.0831447	0.00175675
369.7	16.4979	80944.1	191582	13330.7	76171.2	6854.53	1009.43	60753.8	392.813	209.61	188.746	0.0846823	0.0023318
370.156	16.5159	71989	176589	11366.1	101904	5755.06	1125.89	53491.6	534.423	191.665	165.033	0.0799437	0.00229248
370.614	16.534	73639.1	179701	12040.7	93522.3	5843.07	1097.11	54996.7	517.453	196.16	181.06	0.0793474	0.00245876
371.07	16.552	78746.2	192106	14028.8	78976	6377.66	952.703	59088.5	413.779	206.157	202.661	0.08099	0.0025736
371.528	16.5701	83886.3	199200	15301.6	64952.3	6997.52	1115.31	64334.9	379.883	213.849	191.893	0.0834168	0.00228754
371.983	16.5881	87669.5	204761	16124.5	60129.9	7624.81	983.487	68331.9	374.447	218.562	166.786	0.0869721	0.00190244
372.409	16.6049	86850	202938	15557.5	61177.6	7552.48	785.292	66159.9	329.519	222.807	209.807	0.08696	0.00241574
372.657	16.6147	77817.6	184565	12552.1	82090.2	6358.03	978.465	59727	435.668	203.065	197.98	0.0817044	0.00254415
372.907	16.6246	77248.9	186107	13197	83511.3	6147.21	1109.11	60218.4	459.383	194.421	253.691	0.0795766	0.00328408
373.156	16.6344	75902.5	185611	12975.7	88079.5	6084.86	1205.15	57528.6	488.835	195.596	189.859	0.0801668	0.00250136
373.406	16.6443	64373.4	160695	9185.79	131963	5096.15	1422.3	44426	706.016	175.391	220.884	0.0791655	0.0034313
373.654	16.6541	64827.1	162523	9332.68	126729	5080.16	1501.74	45221.1	616.571	179.764	170.939	0.0783648	0.00263685
373.905	16.664	62436.6	155476	8413.89	137185	4909.12	1558.28	42749.4	699.36	176.129	162.89	0.0786257	0.00260889
374.155	16.6739	58146.5	144532	7292.91	155095	4444.77	1899.96	39515.9	821.551	163.507	200.962	0.0764409	0.00345613
374.403	16.6837	54205.3	134523	6153.7	174358	4168.49	2505.53	36223.6	922.123	155.771	150.938	0.0769018	0.00278456
374.654	16.6936	56357.3	138274	6395.78	166164	4323.79	2886.12	39367.8	823.018	155.218	139.173	0.0767209	0.00246948
374.902	16.7034	57865.9	141345	6777.32	159977	4443.83	2411.84	41129.7	819.346	157.216	159.558	0.0767953	0.00275738
375.153	16.7133	59192.8	145387	7196.37	150480	4560.72	2363.05	41310.9	763.652	163.774	155.882	0.0770486	0.00263346
375.401	16.7231	61433	150251	7758.93	140222	4760.33	2146.23	43995.2	738.059	169.097	132.284	0.0774881	0.0021533
375.651	16.733	58700.2	144770	7324.96	156023	4412.62	2404.9	43242	814.345	155.116	165.434	0.0751721	0.00281829
375.894	16.7426	54298.8	133048	5986.84	174218	4062	3213.54	38046.3	896.074	149.734	146.359	0.0748083	0.00269544
376.107	16.751	52990.1	126137	5320.66	183647	3951.66	4044.1	38971.1	1036.05	140.276	138.042	0.0745736	0.00260505
376.32	16.7594	53489.6	125377	5050.51	172678	4136.2	4047.85	36875.5	998.953	153.643	98.1078	0.0773272	0.00183415
376.532	16.7678	51480.6	124056	5117.1	188190	3791.24	4878.48	37062	990.39	139.147	122.804	0.073644	0.00238545
376.743	16.7761	52138.3	124202	5047.82	185459	3910.08	4856.98	37847.9	996.616	141.236	103.533	0.0749944	0.00198574
376.955	16.7845	54694.1	130608	5720.65	163473	4032.8	4123.17	39829.5	862.674	150.392	133.066	0.0737338	0.00243292
377.168	16.7929	54347.9	128767	5533.07	167773	4005.48	4021.77	40191.1	896.151	147.913	127.469	0.0737008	0.00234543
377.38	16.8013	58570.4	139725	6624.54	149989	4349.67	3615.25	44105.4	775.198	152.811	168.818	0.0742639	0.0028823
377.593	16.8097	58353.4	139689	6735.7	152027	4332.12	3155.37	44232.1	840.686	152.62	164.3	0.0742395	0.00281561
377.803	16.818	64822.1	153512	8219.78	127340	5068.51	2154.15	50005.3	762.358	167.768	151.116	0.0781911	0.00233124
378.228	16.8348	68582.2	164483	9764.6	110659	5312.42	1535.83	52646.8	620.662	179.494	181.047	0.0774606	0.00263985
378.441	16.8432	66453.6	159132	8989.17	122403	5137.64	1539.17	51680.3	673.184	172.546	162.641	0.0773117	0.00244744
378.654	16.8516	68655.6	165819	10054.9	110876	5272.44	1499.66	52944.4	623.412	177.964	194.94	0.0767956	0.00283939
378.864	16.8599	68777	167145	10046.1	113650	5428.13	1500.96	51326.6	644.823	180.138	173.263	0.0789235	0.0025192
379.076	16.8683	67819.5	166238	9940.97	116709	5321.42	1541.48	50326.7	638.528	178.487	175.071	0.0784644	0.00258143
379.289	16.8767	69372.7	171394	10845.1	109255	5386.29	1143.82	51002.4	565.237	184.075	244.354	0.0776429	0.00352233
379.502	16.8851	68372.2	167963	10260.1	113715	5346.22	1228.32	50019	609.161	182.714	210.28	0.0781928	0.00307551
379.714	16.8935	61244.6	150814	8078.93	145372	4718.67	1452.53	43821.8	794.809	165.579	219.299	0.0770462	0.0035807
379.927	16.9019	66804.7	159482	9089.94	120896	5236.24	1411.26	50942.8	707.573	174.157	200.586	0.0783814	0.00300257
380.137	16.9102	70668.2	171338	10523.8	106339	5653.66	1305.75	52549.6	558.378	185.911	196.205	0.0800029	0.00277642
380.347	16.9185	59306.9	143760	7062.57	152530	4660.93	2087.99	41402.1	874.891	163.008	172.484	0.07859	0.00290833
380.542	16.9262	60608.5	147380	7394.8	139295	4740.49	2101.46	41692.5	758.544	174.252	131.414	0.078215	0.00216824
380.737	16.9339	59487.8	145120	7160.72	149883	4593.38	2542.56	42623.4	789.177	162.283	133.562	0.0772154	0.0022452
380.932	16.9416	58446.1	142330	6894.87	159242	4485.33	2821.68	42901.9	872.417	154.815	123.718	0.0767429	0.00211679
381.127	16.9493	59205.5	143795	7106.4	151618	4532.51	2585.79	43264.8	830.045	158.397	150.003	0.0765555	0.0025336
381.322	16.957	59751.4	147175	7411.44	147468	4566.93	2553.29	42802.4	739.628	163.483	131.742	0.0764321	0.00220484
381.517	16.9647	63402.1	155986	8485.64	131569	4940.15	1869.93	44951.8	666.281	172.624	190.192	0.0779177	0.00299977
381.712	16.9724	71881.7	174289	11038.7	102970	5695.86	1395.49	55014.8	537.214	182.713	216.6	0.0792393	0.00301329
381.907	16.9801	68064	167450	10135.9	114794	5240.09	1527.26	51299.7	570.385	177.128	201.067	0.0769878	0.00295409
382.101	16.9878	69361.3	168964	10268.6	108108	5472.73	1525.31	50985.2	594.129	185.679	167.088	0.0789018	0.00240895
382.296	16.9955	72776.8	177175	11422.9	97386.1	5809.57	1260.84	54249.6	499.529	191.792	193.909	0.0798272	0.00266444
382.491	17.0032	70838.6	172570	10721.2	105864	5635.65	1346.56	52959.3	553.812	185.881	178.689	0.0795561	0.00252247
382.686	17.0109	74637.5	184015	12704.3	87547.5	5965.17	1065.14	54267	452.008	202.944	201.744	0.0799219	0.00270298
382.881	17.0186	75177.9	182268	12209	91200.6	6034.21	1115.51	56680.3	463.747	194.987	211.112	0.0802657	0.00280816
383.076	17.0263	75448	180739	12007.4	88676.7	6095.84	1126.6	56836.2	486.68	198.097	196.873	0.0807953	0.00260939
383.271	17.034	72155.8	174203	11078.4	98873.3	5711.44	1179.45	53818.5	523.937	190.337	227.293	0.0791543	0.00315003
383.466	17.0417	68007.8	164774	9858.46	115323	5316.67	1396.98	50876.8	678.881	178.951	191.953	0.0781773	0.00282251
383.661	17.0494	69262	167601	10198.9	109642	5475.53	1383.18	50922.2	641.714	183.143	215.81	0.0790553	0.00311585
384.243	17.0724	72331.3	173353	10964.9	100868	5695.04	1234.54	56246.7	537.52	184.307	218.435	0.0787354	0.00301992
384.438	17.0801	74143.5	179715	11973.5	94605.1	5879.87	1184.3	57490.3	500.703	189.173	202.055	0.0793039	0.0027252
384.633	17.0878	81924.5	194717	14157.7	72492.9	6812.18	1005.29	63428.3	374.06	208.245	192.557	0.0831518	0.00235042
384.828	17.0955	80561.6	192703	14019.1	76849.9	6572.73	983.847	63353	399.381	201.235	218.605	0.0815864	0.00271351
385.023	17.1032	76685.7	186192	12914.3	85554.1	6213.26	984.828	57663	446.352	201.788	192.643	0.0810225	0.00251211
385.218	17.1109	69870.9	168590	10187.2	110312	5554.37	1101.7	52847.8	592.883	185.816	163.526	0.0794949	0.00234041
385.413	17.1186	72494.5	176017	11239.5	101950	5740.6	1214.44	55303.4	517.85	186.287	195.516	0.0791867	0.00269697
385.607	17.1263	80491.4	192340	13653.2	79108.3	6743.07	953.163	62687	411.521	203.908	167.671	0.0837738	0.00208309
385.802	17.134	81710.6	193956	14154.2	73572.3	6772.98	934.608	64996	390.669	206.399	169.926	0.0828899	0.00207961
385.997	17.1417	78277.2	189795	13584.8	81767.5	6284.7	988.249	61148.2	410.365	199.741	193.796	0.0802878	0.00247577
386.192	17.1494	69400.3	167806	10165.9	115568	5473.13	1340.37	54496	632.215	174.514	185.011	0.0788633	0.00266585
386.387	17.1571	65557.4	159792	9040.75	128067	5126.88	1334.16	49121.6	668.731	173.538	175.313	0.0782044	0.00267418
386.582	17.1648	68810.2	165352	9832.2	112997	5452.63	1125.16	52055	627.672	182.737	189.7	0.0792415	0.00275686
386.972	17.1802	85200	196210	14660.7	64458.4	7199.66	873.494	67558.4	391.866	214.237	199.647	0.084503	0.00234327
387.167	17.1879	72220.6	171244	10442.4	101480	5865.95	1086.55	54881.7	561.819	191.59	165.04	0.0812227	0.00228522
387.385	17.1965	65490.5	158693	8840.6	124748	5166.48	1178.84	47857.4	649.396	180.825	164.318	0.0788891	0.00250903
387.62	17.2058	85286.2	191470	13654	63067	7257.59	832.117	68054.8	377.822	217.71	203.855	0.0850969	0.00239024
387.855	17.2151	87628	198613	14980.5	57917.1	7487.98	771.32	69243.7	338.192	224.12	200.211	0.0854519	0.00228479
388.091	17.2244	86444	194761	14226.2	60778.4	7377.99	787.678	69006.9	357.432	220.727	193.85	0.0853499	0.0022425
388.329	17.2338	84792.6	190334	13339.8	65371.8	7316.97	862.113	67356.1	406.901	217.036	176.122	0.0862925	0.00207709
388.564	17.2431	84556.9	192401	13617.3	64866.4	7292.84	856.027	65372.4	377.912	220.963	176.304	0.0862478	0.00208503
388.8	17.2524	85658.3	194266	14019.1	64019.5	7269.49	868.751	68794	354.182	213.76	215.266	0.0848662	0.00251308
389.035	17.2617	86023.5	192960	13992	62220.8	7317.46	829.067	69793.1	375.716	215.13	217.885	0.0850635	0.00253285
389.27	17.271	87341.1	197018	14653.4	58050.2	7532.39	850.392	69577	347.146	222.844	187.784	0.0862411	0.00215001
389.506	17.2803	87621.2	196584	14377.4	59056.5	7683.65	839.858	69835.4	357.243	222.985	170.734	0.0876917	0.00194854
389.741	17.2896	84616.6	190737	13261.8	65997.7	7330.27	897.508	67496.9	389.385	217.139	153.348	0.0866292	0.00181226
389.979	17.299	84596.8	191373	13303.9	66587.2	7370.15	871.881	66893.4	382.605	217.17	163.882	0.0871209	0.00193721
390.215	17.3083	83804.2	189898	13105.5	68757.5	7275.94	875.33	65604.6	409.306	215.557	171.976	0.0868208	0.00205212
390.45	17.3176	84893.9	192415	13754.4	62878.5	7269.16	821.758	65981.7	367.408	222.133	193.8	0.0856265	0.00228285
390.685	17.3269	85104.7	193053	13595.7	64476.9	7415.93	805.989	64461.4	370.135	223.227	201.304	0.0871389	0.00236537
390.921	17.3362	84380.2	192599	13576.9	64743.1	7360.23	829.574	62792.4	378.191	224.963	200.84	0.0872271	0.00238018
391.156	17.3455	83699.8	190813	13437	67592.8	7076.32	851.918	65699.7	377.183	213.918	219.493	0.084544	0.00262238
391.391	17.3548	83141.4	189172	13170.1	68838.6	7108.94	836.364	63426.5	411.681	215.504	240.04	0.0855043	0.00288713
391.627	17.3641	71080.9	169127	9838.03	97651.9	6287.53	809.171	44833	606.592	222.097	153.036	0.0884559	0.00215299
391.865	17.3735	58582.9	145563	7511.51	149280	4514.63	1323.7	40043.3	810.067	171.589	178.926	0.0770639	0.00305423
392.123	17.3837	57652.5	144292	7318.16	159982	4412.07	1357.15	39600.7	813.124	165.054	179.144	0.0765287	0.00310731
392.5	17.3986	71072.9	166640	9765.65	105404	5778.73	1046.6	53155.9	618.08	192.12	157.862	0.0813071	0.00222113
392.878	17.4135	77958	178123	11505.1	80875.6	6441.73	923.387	61222.6	487.787	205.927	165.901	0.0826308	0.00212809
393.252	17.4283	75809.6	175986	11229.8	88718.3	6137.62	936.389	59759.7	493.671	197.02	196.703	0.080961	0.00259469
393.629	17.4432	74869.7	176640	11017.4	92217.6	6240.45	922.903	55247.7	498.766	204.889	149.197	0.0833508	0.00199276
394.007	17.4581	71917	171097	10105.2	101645	6159.34	949.494	48488.7	591.512	206.496	167.988	0.0856451	0.00233585
394.384	17.473	65912.1	158056	8746.53	124338	5359.55	972.956	46184.9	726.393	185.582	198.156	0.0813136	0.00300636
394.761	17.4879	75860.4	177336	10970.2	91210.3	6474.81	947.707	56135.9	519.629	206.593	126.623	0.0853517	0.00166916
395.515	17.5177	68998.9	164571	9555.91	112684	5607.72	972.172	49721.3	631.161	189.018	213.293	0.0812726	0.00309126
395.672	17.5239	69228.7	164667	9410.47	111974	5664.97	1177.28	50376.5	611.167	188.504	171.937	0.0818298	0.00248361
395.761	17.5274	53038.6	131813	5969.69	190753	4050.89	1850.77	36680.4	1011.06	149.329	137.85	0.0763763	0.00259904
395.847	17.5308	54267.6	135233	6249.87	177624	4140.79	1716.41	36840.9	902.765	159.315	116.506	0.0763032	0.00214688
395.936	17.5343	52593.1	130165	5714.87	183008	4026.56	2045.16	34965.5	946.313	157.184	115.408	0.0765606	0.00219437
396.022	17.5377	50752.3	123364	5190.98	194475	3726.66	2676.86	35678.1	1040.35	142.929	147.416	0.0734284	0.00290462
396.11	17.5412	49220.1	119089	4740.96	201517	3611.23	3055.28	34456.2	1033.92	141.592	112.532	0.0733689	0.0022863
396.196	17.5446	50969.8	122699	4991.98	193026	3856.51	2910.2	35392.8	1064.41	146.906	101.17	0.0756626	0.0019849
396.285	17.5481	47882.9	114422	4441.19	213854	3495.21	3575.51	34759.4	1196.77	130.121	153.044	0.0729949	0.00319623
396.371	17.5515	49366.9	120178	4891.06	201482	3624.02	3121.15	35151.6	1060.73	139.948	111.59	0.0734099	0.00226042
396.46	17.555	51685.6	122108	5124.69	186902	3729.58	2387.04	38562.3	1082.93	143.338	140.629	0.072159	0.00272086
396.546	17.5584	60318.8	139777	6619.25	147111	4604.58	1691.96	46515	853.472	163.288	127.301	0.0763374	0.00211047
396.657	17.5628	69590.8	161221	9148.62	107173	5470.09	1201.95	54476.2	618.474	186.549	143.361	0.0786037	0.00206006
396.89	17.572	71483.8	165436	9875.63	99561.7	5586.86	1025.73	56850.1	559.37	188.135	205.334	0.0781557	0.00287245
397.123	17.5812	62318.1	146194	7550.58	138653	4747.95	1222.73	48350.7	808.44	165.428	211.912	0.076189	0.0034005
397.356	17.5904	49448.1	123482	5522.25	206637	3505.27	1793.35	35796.7	1096.09	136.734	199.794	0.0708878	0.00404048
397.589	17.5996	47805.6	121065	5470.93	208708	3266.59	2022.82	34328.8	1146.68	134.98	201.786	0.0683306	0.00422096
397.821	17.6088	52107.2	126864	5909.62	179618	3526.93	1886.27	40038.6	934.209	141.005	268.356	0.0676861	0.00515008
398.054	17.618	53693.3	129884	6013.48	177190	3786.39	1960.08	41249.1	928.692	143.893	201.175	0.0705187	0.00374674
398.29	17.6273	52012	127209	5728.84	185299	3689.62	2101.19	38478.3	953.118	143.34	186.388	0.0709379	0.00358356
398.523	17.6365	52038.8	126101	5591.5	185861	3696.81	2066.03	38515	960.012	142.744	202.634	0.0710394	0.00389391
398.756	17.6457	51655.5	129285	6057.69	184063	3589.44	2226.86	37178.9	902.498	142.373	259.344	0.0694881	0.00502064
398.988	17.6549	50668.7	131970	6268.23	178305	3772.64	1464.11	29858.9	884.328	165.324	265.817	0.074457	0.00524618
399.221	17.6641	46486.3	120851	5132.64	214804	3525.99	1747.78	26355	1098.13	149.963	257.141	0.0758501	0.00553155
399.454	17.6733	42873.9	110658	4584.79	238536	2974.78	2281.42	27574	1289.14	127.11	317.296	0.0693844	0.00740068
399.923	17.6918	49663.9	129507	6206.6	196403	3521.48	1637.39	32218.1	967.25	146.414	294.943	0.0709062	0.00593878
400.155	17.701	48759.2	121328	5300.58	206205	3443.8	2049.76	34830.7	1133.59	138.044	166.837	0.0706287	0.00342166
400.388	17.7102	49508.9	125619	5574.42	196630	3637.51	1632.55	32163.1	1028.27	153.302	138.271	0.073472	0.00279285
400.621	17.7194	48608	120461	5155	214395	3538.11	1922.87	34754.6	1199.16	136.019	153.867	0.0727886	0.00316547
400.854	17.7286	46518.5	117723	4884.44	222682	3410.07	2207.3	31249.5	1207.46	138.185	114.923	0.0733056	0.00247049
401.087	17.7378	45981.8	118416	5053.51	226087	3279.35	2598.88	31213.6	1169.94	132.606	142.875	0.0713184	0.0031072
401.32	17.747	47750.5	122457	5257.97	212634	3478.48	2488.23	31674.9	1084.79	142.7	101.961	0.072847	0.00213528
401.555	17.7563	45448.6	117268	4908.08	224938	3202.09	2844.86	30185.9	1088.56	133.904	144.364	0.0704552	0.00317641
401.788	17.7655	46572	120384	5196.78	219240	3332.68	2490.24	31018.5	1124.15	137.877	126.98	0.0715598	0.00272654
402.021	17.7747	48470.7	123041	5455.23	209066	3436.66	2072.51	33875.7	1074.51	138.674	158.099	0.0709018	0.00326174
402.254	17.7839	48330.1	123453	5346.47	212763	3528.91	2578.13	32689	1080.48	139.459	121.048	0.0730167	0.0025046
402.487	17.7931	48075	123465	5532.66	213493	3387.83	2336.09	33796.3	1080.67	135.373	152.083	0.0704698	0.00316345
402.72	17.8023	48873	124888	5641.7	205386	3438.82	2620.66	34130.8	1061.02	137.292	164.401	0.0703623	0.00336383
402.953	17.8115	49136.6	125592	5741.66	201311	3432.15	2737.38	34461.4	1040.39	137.379	182.284	0.069849	0.00370974
403.186	17.8207	48092.8	125114	5693.33	204906	3386.57	2746.7	32639	1014.13	139.49	157.362	0.0704174	0.00327206
403.421	17.83	42757.9	112011	4593.93	249553	2926.74	4165.18	29606.4	1179.8	117.998	157.377	0.068449	0.00368064
403.654	17.8392	44186.3	115882	4885.72	229426	3000.66	4088.6	29718.1	1086.94	127.867	138.613	0.0679093	0.00313702
403.887	17.8484	41595.4	109351	4425.53	251113	2800.13	4904.55	28604.6	1247.97	117.453	131.571	0.0673182	0.00316312
404.12	17.8576	41143.8	109004	4321.67	255644	2874.65	4697.62	26301	1296.49	121.134	124.67	0.0698685	0.0030301
404.586	17.876	42330	117372	5555.89	228318	2660.21	3561.13	26622.4	1015.28	122.613	610.421	0.0628447	0.0144205
404.819	17.8852	39098.8	108516	4922.87	264893	2355.21	4679.73	26656.3	1171.54	102.352	774.616	0.0602373	0.0198118
405.087	17.8958	41884.2	116276	5612.26	233893	2532.41	3959.05	28345.4	1032.17	114.506	671.389	0.0604623	0.0160297
405.38	17.9074	41761.4	115091	5448	241045	2558.12	4145.84	28255.7	1113.73	112.061	637.418	0.0612556	0.0152633
405.674	17.919	42233.2	117249	5686.91	231542	2576.67	3810.2	27827.2	1049.77	116.637	719.108	0.0610105	0.0170271
405.968	17.9306	40010.4	109441	5035.27	255092	2380.2	4224.16	27760.1	1181.15	103.977	929.985	0.0594896	0.0232436
406.261	17.9422	43255.6	120983	6163.47	220935	2588.51	3276.41	28747.1	947.064	119.047	956.307	0.0598422	0.0221083
406.555	17.9538	43169.4	120340	6189.26	231350	2567.18	3329.06	30270.3	1027.48	111.394	1049.29	0.0594676	0.0243063
406.849	17.9654	42622.6	118769	6085.05	238205	2505.7	3344.39	30648.7	1070.59	108.024	995.084	0.058788	0.0233464
407.142	17.977	43167.2	120826	6156.8	223997	2600.06	3073.24	28771.9	960.366	118.134	992.195	0.0602324	0.0229849
407.436	17.9886	42719.9	119893	6113.24	226823	2567.43	3006.48	28259.4	989.335	117.045	1101.32	0.060099	0.0257799
407.729	18.0002	43485.4	121027	6157.03	219992	2651.84	2757.83	28559.5	983.777	121.5	978.116	0.0609823	0.022493
408.023	18.0118	46828.4	130412	7139.31	205107	2905.31	2356.99	31502.6	910.722	125.715	1049.73	0.0620417	0.0224165
408.314	18.0233	45661	126884	6803.16	210505	2771.15	2462.51	30993.4	908.904	122.113	1197.14	0.0606897	0.0262179
408.608	18.0349	45987.1	129158	7158.81	212566	2799.37	2465.44	31476.6	962.812	120.504	1160.79	0.0608728	0.0252416
408.901	18.0465	47040.8	131570	7283.73	202876	2959.37	2243.96	30922.9	927.456	127.977	1107.91	0.0629107	0.023552
409.746	18.0697	47096.2	133649	7436.62	207286	3037.6	2179.9	29816.2	925.949	129.596	998.312	0.0644977	0.0211973
410.169	18.0813	47120.4	132508	7404.57	205121	2972.52	2146.87	31225.2	933.9	127.741	978.62	0.0630835	0.0207685
410.606	18.0929	47286.7	132178	7356.56	206280	2961.01	2063.57	32034.2	922.934	126.32	975.495	0.0626183	0.0206294
411.043	18.1045	46858.8	131286	7167.05	207011	2988.72	1955.97	30126.7	926.063	130.032	996.144	0.0637816	0.0212584
411.48	18.1161	47865.3	134202	7567.63	197110	3028.39	1980.51	30996.4	893.91	132.379	1087.14	0.0632691	0.0227125
411.917	18.1277	46848.6	131175	7215.25	211387	2961.4	2077.02	31073.4	935.358	124.493	1175.55	0.0632121	0.0250925
412.354	18.1393	46761.2	131299	7119.21	210962	3024.42	1889.93	29736.2	912.44	128.761	1130.89	0.064678	0.0241844
412.791	18.1509	48408.1	133232	7225.53	205893	3163.91	2058.49	32122.3	935.238	127.703	1021.87	0.0653591	0.0211094
413.228	18.1625	48278.9	135440	7561.81	203148	3165.35	1817.7	30953.1	925.382	132.739	910.904	0.0655638	0.0188675
413.627	18.1731	49722.3	138663	7913.65	193059	3252.28	1809.89	32627.5	874.771	135.624	848.9	0.0654088	0.0170728
414.011	18.1833	50411.6	140425	7853.87	191777	3450.76	1692.17	31609	881.96	142.998	591.588	0.0684516	0.0117351
414.396	18.1935	49271.4	137266	7627.64	196675	3283.11	1796.46	31457.1	923.992	138.675	619.802	0.0666332	0.0125793
414.78	18.2037	48227.7	134213	7169.63	206860	3295.12	1879.94	30124.2	992.756	136.935	540.435	0.0683241	0.0112059
415.164	18.2139	51143	141398	7758.84	191851	3622.21	1699.95	31694.2	900.184	145.68	472.67	0.0708251	0.00924212
415.548	18.2241	48543.7	134780	7173.01	204496	3336.67	1844.57	29556.7	955.75	138.24	680.586	0.0687354	0.0140201
415.933	18.2343	52488.5	146806	8386.21	179317	3726.02	1618.5	31372.9	802.281	153.427	526.858	0.0709873	0.0100376
416.317	18.2445	53510.7	146752	8346.57	173354	3815.7	1680.93	32433.3	835.609	153.986	576.146	0.0713072	0.0107669
416.701	18.2547	52574.1	146331	8715.53	175112	3571.72	1708.24	33930.4	859.99	147.596	572.747	0.0679369	0.0108941
417.089	18.265	55802.9	153588	9297.38	162758	3884.11	1552.1	36576.8	717.321	154.257	502.298	0.069604	0.00900129
417.473	18.2752	53343.8	146550	8499.8	176439	3709.6	1557.28	34494.6	820.094	148.037	588.351	0.0695413	0.0110294
417.858	18.2854	53254.8	147143	8276.79	173250	3871.03	1501.25	31614.8	786.621	159.475	453.385	0.0726888	0.0085135
418.242	18.2956	52423.7	145832	8568.57	177259	3580.75	1488.98	33722.7	809.95	148.501	588.805	0.068304	0.0112316
418.626	18.3058	55426.5	150068	8691.83	158897	4037.12	1261.23	34679.2	748.908	164.213	463.643	0.0728373	0.008365
419.01	18.316	53675.8	150609	8979.27	169734	3773.16	1467.28	33815.1	730.018	155.815	464.083	0.0702953	0.00864604
419.394	18.3262	51069.2	140263	7602.59	191028	3628.59	1602.05	32231.4	856.264	145.114	516.073	0.0710524	0.0101054
419.779	18.3364	52584.3	145779	8162.82	179477	3789.46	1633.85	32338.9	784.488	152.731	459.026	0.0720645	0.00872934
420.163	18.3466	48177.1	135009	7235.82	204523	3299.15	1782.57	30080.1	909.736	139.035	520.139	0.0684796	0.0107964
420.551	18.3569	49926	138904	7626.9	191711	3466.57	1663.48	31148.9	880.965	145.278	504.55	0.0694342	0.010106
420.939	18.3672	49665.6	138286	7517.3	196769	3445.91	1607.09	31385.1	867.441	143.272	465.587	0.0693823	0.00937444
421.327	18.3775	50916	139976	7637.9	186141	3553.58	1604.37	32269.9	838.135	147.929	460.421	0.0697929	0.00904274
421.715	18.3878	53033.8	144141	8076.56	172156	3778.26	1382.55	33889.2	816.625	156.182	410.549	0.0712425	0.00774127
422.103	18.3981	51912.7	142343	7832.41	181084	3716.12	1486.35	33105.8	835.729	152.59	358.959	0.0715841	0.00691466
422.491	18.4084	50193.5	138774	7488.42	190804	3553.25	1555.19	31602.1	877.203	148.799	358.399	0.0707911	0.00714035
422.883	18.4188	48113.7	133473	6955.25	207758	3376.22	1831.51	31059.8	955.026	138.767	335.701	0.0701716	0.00697724
423.271	18.4291	45910.8	125675	6228.87	221933	3129.15	2101.5	30298.8	1070.89	129.572	389.825	0.0681571	0.00849092
423.659	18.4394	46519.2	128138	6446.13	211871	3215.57	2116.58	29892.4	1047.72	136.903	307.4	0.0691236	0.00660802
424.047	18.4497	46257.6	127307	6586.33	208681	2983.04	2021.69	30086.6	991.336	132.994	561.934	0.0644875	0.0121479
424.438	18.4601	45941.8	127798	6529.34	211651	3049.8	2154.15	29052.6	980.91	135.13	438.831	0.0663839	0.00955188
424.826	18.4704	45289.3	122566	6000.74	209921	3042.12	2091.28	28759.4	1126.15	135.954	450.608	0.0671707	0.00994954
427.158	18.5323	44238.6	120241	5791.51	223654	2850.05	2112.82	29292.1	969.484	125.203	693.446	0.0644246	0.0156751
427.546	18.5426	44475.6	118387	5694.39	213150	2844.69	1931.66	29325.3	1094.81	129.66	725.021	0.0639607	0.0163015
427.938	18.553	45548.8	122744	6078.5	213598	2929.8	2116.48	30587.7	1025.75	128.145	637.579	0.0643221	0.0139977
428.326	18.5633	47008.2	126939	6558.41	203198	3023.3	1957	31863.2	985.944	131.526	673.189	0.0643142	0.0143206
428.714	18.5736	49349.5	132639	6901.3	194457	3324.03	1764.07	33011.6	911.013	139.519	483.452	0.0673568	0.00979648
429.102	18.5839	49532.9	132731	6710.08	192278	3440.3	1665.33	31597.6	868.947	145.878	433.476	0.0694549	0.00875127
429.494	18.5943	53774.4	145956	8338.66	168871	3749.2	1454.97	35031.6	798.732	155.289	408.661	0.069721	0.00759955
429.882	18.6046	53975	146757	8370.05	175774	3721.16	1565.96	37275.1	751.11	147.553	366.073	0.0689423	0.00678227
430.27	18.6149	54381.4	146690	8404.74	162154	3839.72	1282.97	34761.6	785.509	161.431	424.639	0.0706071	0.00780853
430.658	18.6252	53014.3	140512	7607.16	177974	3735.07	1629.34	35794	906.991	148.018	383.308	0.0704539	0.00723027
431.046	18.6355	53614.5	143825	7955.78	174713	3781.41	1530.12	35401.2	822.732	151.098	415.452	0.0705295	0.00774887
431.438	18.6459	53401	141420	7562.41	178346	3838.72	1470.83	35168.9	881.546	151.764	350.486	0.0718848	0.00656327
431.826	18.6562	54777.6	147679	7983.75	178331	4037.09	1521.15	36417.3	720.947	153.7	243.887	0.0736997	0.00445231
432.214	18.6665	58253.3	154291	8715.44	157432	4355.3	1106.98	38905.5	632.65	165.222	300.885	0.0747649	0.00516512
432.602	18.6768	58927.1	151263	8710.74	145661	4350.84	1026.26	40868.4	754.547	166.992	375.841	0.0738344	0.00637807
432.993	18.6872	53956.6	143723	7814.05	171348	3925.22	1298.44	34593.5	826.799	158.45	360.856	0.0727478	0.0066879
433.381	18.6975	55115.4	149307	8384.43	160960	4038.19	1260.85	34071.1	721.28	169.056	285.861	0.0732679	0.00518659
433.769	18.7078	58886.6	157037	9281.47	155045	4363.65	1563.93	40136.5	737.862	160.129	271.96	0.0741026	0.00461837
434.157	18.7181	56103.2	151514	8753.19	156415	4145.8	1549.13	35117.7	832.631	168.624	236.545	0.0738959	0.00421625
434.545	18.7284	60081.5	158950	9232.97	150927	4522.68	1474.38	40591.5	647.595	164.629	259.556	0.0752757	0.00432006
434.937	18.7388	57398.9	153367	8988.46	152833	4180.37	1428.84	37957	750.415	164.977	289.773	0.0728302	0.00504841
435.325	18.7491	56809.2	152831	8687.92	160840	4210.81	1756.55	36291.7	783.557	163.364	228.425	0.0741219	0.00402091
435.713	18.7594	56440.2	152344	8759.67	163726	4117.71	1720.74	36885.7	768.316	157.74	301.945	0.072957	0.00534983
436.101	18.7697	61353	165399	10225.8	138399	4631.74	1336.08	39375.8	616.722	176.867	246.69	0.0754934	0.00402083
436.493	18.7801	65735.3	173711	11295.2	120292	5055.25	1226.41	43692.8	553.688	185.811	225.036	0.0769031	0.00342336
436.881	18.7904	63404.4	168394	10841.9	128128	4797.61	1298.36	42297.7	655.904	179.384	235.632	0.0756669	0.00371633
437.269	18.8007	62265.6	162924	9822.99	134727	4777.05	1280.71	40969.8	671.201	178.476	228.951	0.0767206	0.00367702
437.657	18.811	60743.5	152588	8321.64	149288	4753.68	1470.11	42359.8	834.304	166.06	194.691	0.0782583	0.00320514
438.049	18.8214	53166.4	141803	7220.8	178992	3966.63	1821.33	33721.1	825.149	160.144	148.553	0.0746079	0.00279411
438.437	18.8317	58988.4	156746	9080.32	150467	4354.57	1595.45	39820.5	660.871	165.524	226.541	0.0738208	0.00384043
438.825	18.842	63002.5	167669	10728.3	129971	4700.61	1485.32	42648.1	653.985	176.539	205.818	0.0746099	0.00326682
439.213	18.8523	54657.6	145008	7841.16	172316	3989.21	2099.19	36595.1	917.772	154.224	183.916	0.0729855	0.00336487
439.601	18.8626	49210.7	130532	6177.84	203029	3594.45	2661.85	31691.3	1017.37	143.074	172.556	0.073042	0.00350647
439.985	18.8728	53212.3	140684	7226.8	174309	3809.71	2287.81	35377.8	783.887	153.371	205.767	0.0715946	0.00386691
440.328	18.8819	61018.8	159704	9340.58	139910	4549.17	1948.66	42087	663.994	169.569	165.326	0.0745536	0.00270942
440.674	18.8911	68365.1	178411	11879.8	114069	5228.39	1528.87	48566	513.698	180.616	203.092	0.0764774	0.00297069
441.017	18.9002	71881.6	187219	13565.4	94142.1	5616.18	1113.59	48421.4	468.091	201.565	242.774	0.078131	0.00337741
441.364	18.9094	66832	177629	12132.8	116772	5045.35	1377.43	45682.2	554.494	180.734	268.452	0.075493	0.00401683
441.706	18.9185	65513.1	173988	11469.9	121780	4940.73	1428.76	43766.5	561.999	179.451	287.015	0.075416	0.00438104
442.053	18.9277	65786.6	173462	11611.5	118672	4919.22	1404.28	44989.4	601.663	179.794	269.3	0.0747754	0.00409355
442.396	18.9368	61264.1	159110	9581.33	138497	4538.67	1768.04	42738.3	774.979	167.153	218.604	0.0740837	0.00356822
442.739	18.9459	54903.2	144797	7748.36	169329	3981.4	2245.53	37666.3	841.912	153.701	178.588	0.0725167	0.00325278
443.085	18.9551	52818	139762	7163.94	181052	3849.12	2436.28	35132.7	907.943	149.828	186.89	0.0728753	0.00353838
443.428	18.9642	50450.4	133179	6550.02	193122	3572.9	2622.95	33695.6	956.306	142.742	215.205	0.07082	0.00426568
443.774	18.9734	51705	133487	6543.69	182041	3672.77	2467.84	34654.8	937.336	146.431	269.291	0.0710331	0.00520821
444.117	18.9825	51607.2	132740	6485.64	183034	3651.92	2340.02	35053.8	925.749	144.809	301.04	0.0707638	0.0058333
444.464	18.9917	50309.7	127729	6139.92	189620	3441.98	2751.17	35918.7	995.763	133.711	456.936	0.0684159	0.00908247
444.807	19.0008	50405.3	131195	6613.02	185679	3338.48	2819.53	35840.6	861.419	133.642	557.932	0.0662326	0.0110689
445.153	19.01	52171.1	135141	7113.87	171593	3376.57	2229.55	37696.7	729.885	137.73	828.829	0.0647211	0.0158868
445.496	19.0191	55403.2	140651	7662.99	163893	3627.93	2044.54	43654.1	731.235	137.509	593.618	0.0654823	0.0107145
446.874	19.0557	59376.1	153906	9484.4	146679	3858.75	1303.38	46997.3	539.56	142.081	1291.96	0.0649882	0.021759
447.217	19.0648	58019.2	147311	8706.92	148553	3864.7	1367.12	44589.5	743.457	146.186	886.59	0.0666107	0.015281
447.564	19.074	65250.2	168276	11082.9	118683	4741.57	1193.81	46280.9	594.066	174.011	473.448	0.0726675	0.00725589
447.907	19.0831	64536.2	164755	10203.1	124981	4899.62	1328.07	45120.5	672.729	176.242	269.569	0.0759205	0.00417702
448.253	19.0923	66056.6	167726	10601.2	120451	5037.69	1203.35	47025.7	622.497	176.465	325.851	0.0762633	0.0049329
448.596	19.1014	74108.7	185357	13428.4	88819.5	5797.56	922.68	54087.6	477.145	197.832	302.659	0.0782304	0.00408399
448.943	19.1106	81778.6	202969	16674.9	70651.4	6528.85	818.721	65022.4	360.035	203.861	243.09	0.0798357	0.00297253
449.286	19.1197	83652.7	204450	16807.2	66220.7	6779.13	839.776	65326.6	348.432	208.229	277.981	0.0810389	0.00332303
449.628	19.1288	86544	211513	18403.9	60198.4	6996.21	812.757	69883.4	304.898	208.733	278.513	0.0808398	0.00321817
449.975	19.138	88039.7	214573	18764.9	56273.6	7281.27	775.154	69114.2	283.959	219.804	219.964	0.0827044	0.00249846
450.318	19.1471	84842	207738	17582.8	64177.6	6848.2	776.67	67252.6	328.578	207.474	305.045	0.0807172	0.00359544
450.687	19.1569	71448.1	182438	12476.1	101633	5654.94	943.374	50693.2	469.988	194.68	225.992	0.0791475	0.00316302
451.064	19.1669	65864.1	168207	10708.5	118005	5025.65	1250.73	47607.9	612.87	179.861	224.381	0.0763033	0.00340673
451.44	19.1769	65060	168227	10640	119589	4999.79	1097.86	45552.6	577.921	184.696	210.394	0.0768488	0.00323384
451.817	19.1869	63884.9	164401	10236.6	125022	4798.74	1355.99	45544.8	637.786	175.272	248.119	0.0751153	0.00388385
452.194	19.1969	65016	166753	10238.5	125780	4972.11	1394.32	46635.3	599.876	175.965	197.311	0.0764752	0.00303482
452.57	19.2069	63989.1	165902	10136.2	130229	4853.84	1369.84	44879.7	592.912	174.598	221.096	0.0758543	0.00345521
453.324	19.2269	65199.9	166652	10053.4	127528	5045.48	1608.01	46838.6	615.696	174.892	161.189	0.0773848	0.00247222
453.7	19.2369	67287.5	171547	10990.2	117931	5219.83	1423.57	48766.4	619.559	177.783	209.195	0.0775751	0.00310897
459.076	19.3796	61475.2	163434	10179.3	133350	4434.65	1582.67	43566.4	541.786	167.114	322.154	0.0721372	0.00524039
461.626	19.4473	64212.2	162129	9690.76	129338	4920.61	1707.25	48147.5	666.166	167.082	214.906	0.0766305	0.00334681
464.18	19.5151	63695.8	165993	10283.8	129100	4848.56	1492.77	44498	633.369	174.767	209.937	0.0761206	0.00329593
466.731	19.5828	62396.1	163369	10152.5	135484	4594.86	1720.58	44766.2	660.312	164.005	285.846	0.0736403	0.00458116
469.285	19.6506	60629	157757	9290.11	141793	4539.66	1870.29	42787	718.879	163.781	235.597	0.0748761	0.00388588
471.835	19.7183	47280.6	124598	5691.76	210368	3371.87	3401.22	32159.3	1032.8	133.874	182.384	0.0713162	0.00385748
473.085	19.7515	45561.6	119822	5094.1	216502	3322.47	3910.32	29061	1090.42	138.729	110.597	0.0729227	0.00242741
473.462	19.7615	43911.5	113744	4686.14	237051	3111.37	4665.88	30039.1	1257.55	122.163	151.872	0.0708555	0.0034586
473.839	19.7715	47002	122977	5414.9	214812	3380	4223.31	32104.3	1074.3	132.795	121.261	0.0719118	0.0025799
474.216	19.7815	47603.3	125017	5569.87	209576	3483.72	3888.04	31369.7	1052.05	137.416	134.03	0.0731823	0.00281555
474.592	19.7915	49431.1	129802	6097.17	194417	3568.66	3419.96	32570.4	989.206	143.109	163.751	0.0721947	0.00331271
474.969	19.8015	49814.7	131307	6253.8	192318	3587.42	3540.97	33159.9	990.995	144.251	133.579	0.0720154	0.00268152
475.346	19.8115	49842.2	133263	6556.98	196882	3577.64	3612.43	33485.3	1039.68	140.573	136.555	0.0717793	0.00273975
475.722	19.8215	49469.3	129346	6067	192159	3532.99	3606.98	32895.7	1024.82	144.408	131.721	0.0714178	0.00266268
476.099	19.8315	50671.6	132374	6374.7	185568	3608.2	3528.04	33680.5	958.622	144.94	179.769	0.0712076	0.00354773
476.54	19.8432	50278	128346	5793.71	194466	3633.33	3831.37	34860.8	985.479	140.176	132.974	0.0722648	0.00264478
477.026	19.8561	49368.4	124664	5535.46	196596	3452.09	4043.36	35278.5	1000.43	135.4	159.967	0.069925	0.00324026
477.512	19.869	50786	129046	5868.18	188543	3614.3	3839.62	36088.4	945.666	142.208	112.482	0.0711672	0.00221483
477.998	19.8819	52414.8	131360	6061.66	179238	3741.02	3655.94	38378.2	925.161	145.179	102.719	0.0713732	0.00195973
478.484	19.8948	51585.5	126375	5737.67	189225	3525.34	3775.32	41632	1004.14	131.124	142.693	0.0683398	0.00276615
478.969	19.9077	54624.8	135067	6637.43	166111	3736.11	2998.77	43975.1	830.736	143.061	141.899	0.0683958	0.0025977
479.41	19.9194	55491.9	135218	6588.53	163083	3882.1	2806.66	44333.6	881.499	145.678	141.577	0.0699581	0.00255131
479.779	19.9292	55666.2	135002	6577.45	162683	3840.59	2608.8	45431.7	820.551	143.592	174.245	0.0689932	0.00313019
480.152	19.9391	57372.1	138790	7231.41	152991	3850.25	2297.48	48272.9	801.227	142.156	291.878	0.0671101	0.00508745
480.521	19.9489	58568.9	142232	7705.6	141995	3901.39	1945.15	48399.1	716.702	148.649	365.388	0.066612	0.00623859
480.891	19.9587	61014.2	146220	8279.75	133210	4075.23	1653.08	52015.6	669.479	147.175	642.161	0.0667915	0.0105248
481.264	19.9686	70259.5	165889	10981.5	98499.6	4867.12	1417.61	62465.5	521.971	162.028	637.189	0.0692735	0.00906908
481.633	19.9784	90715.4	212005	19863.3	45827.1	7033.03	825.791	79601.5	258.649	210.889	414.906	0.0775286	0.00457371
482.002	19.9882	96466	224881	22926.8	36777.3	7729.3	784.547	84645.9	195.892	221.911	369.625	0.0801246	0.00383166
482.375	19.9981	104346	245629	29969.3	26118.8	8667.33	778.377	91292	152.019	233.625	323.954	0.0830631	0.00310461
482.744	20.0079	76662.5	189663	14640.1	78703.3	5658.81	808.777	62090.2	337.447	189.938	574.381	0.0738145	0.00749233
483.113	20.0177	61292.2	151724	9926.61	124651	3686.63	1075.08	59286.9	522.684	140.412	1126.64	0.0601483	0.0183815
483.844	20.0371	56662.3	136965	8536.6	133102	3218.29	1236.33	55904.4	846.951	135.399	917.434	0.0567977	0.0161913
484.191	20.0463	61651.5	147283	9025.88	128319	3786	1166.26	60583	610.502	139.337	825.744	0.0614098	0.0133937
484.537	20.0555	62717.2	153855	9661.01	127389	4056.71	1341.08	55842.9	625.533	146.183	726.423	0.0646826	0.0115825
484.884	20.0647	68021.4	167816	10837.6	109503	4975.36	1300.33	52827.7	571.595	173.07	374.553	0.073144	0.00550641
485.23	20.0739	67816.6	172643	11064.3	113829	5364.06	1175.62	46917.2	603.358	187.294	217.824	0.0790965	0.00321196
485.688	20.0831	80976.9	192804	13969.5	75464.8	6937.24	937.556	59533.8	458.86	209.166	249.622	0.0856694	0.00308263
486.366	20.0923	104451	244798	27954.3	27975.1	9677.99	659.314	75878.9	208.458	259.376	354.092	0.0926557	0.00339002
487.044	20.1015	109419	255076	31854.5	22130.3	10250.5	815.739	79805.1	168.206	263.018	381.112	0.0936814	0.00348306
487.722	20.1107	105077	245646	27830.6	27750.6	9865.92	636.993	76109.8	197.424	260.998	353.964	0.0938925	0.00336862
488.401	20.1199	103354	235568	24265.5	30936.5	9793.91	703.308	76174.2	227.594	256.567	308.272	0.0947609	0.00298268
489.079	20.1291	99659.4	227616	22240.9	34813.2	9188.95	730.058	75629.9	234.574	246.266	357.206	0.0922036	0.00358427
489.757	20.1383	99359.7	226681	20595.5	37942.2	9671.34	710.351	71428	245.926	255.953	231.523	0.0973366	0.00233015
490.435	20.1475	91275.4	208793	16269.9	52771.5	8587.63	596.724	65063.4	297.418	242.145	274.633	0.0940848	0.00300884
491.113	20.1567	72976.3	173438	11031.4	96888.8	5923.06	1062.67	54168	531.308	187.093	442.209	0.0811642	0.00605962
491.791	20.1659	65803.9	160801	9792.91	118120	4886.7	1285.61	50541.6	631.329	168.484	449.575	0.0742616	0.00683204
492.469	20.1751	62899.2	154666	9121.59	130302	4473.44	1548.83	49558	689.725	157.961	428.447	0.0711208	0.00681164
493.147	20.1843	62848.9	157442	9302.98	127372	4572.37	1771.2	46811.2	650.485	165.834	310.293	0.0727518	0.00493712
493.825	20.1935	62105.4	156495	9028.38	129672	4637.77	1508.83	44179	652.277	173.218	246.556	0.0746757	0.00396996
494.525	20.203	60771	152711	8370.16	145059	4655.06	1752.49	44151.5	773.091	164.899	157.771	0.0766001	0.00259616
495.232	20.2126	59456	151057	8204.43	149979	4563.07	1542.46	41718.7	793.665	167.282	152.695	0.076747	0.00256821
495.932	20.2221	56225.6	144187	7517.76	167369	4237.07	1591.27	39144.4	860.467	157.546	183.674	0.0753584	0.00326673
496.633	20.2316	49603.3	131060	6269.46	199493	3649.2	1867.37	31996.2	1026.62	149.085	155.405	0.0735677	0.00313296
497.34	20.2412	40409.8	103226	3918.53	273213	2869.94	2986.32	27347.4	1595.83	115.033	142.744	0.071021	0.00353242
498.04	20.2507	43416.7	112357	4571.2	241885	3140.21	2756.98	28107.1	1380.77	130.26	123.521	0.0723274	0.00284501
498.748	20.2603	46426.3	114114	4820.29	217942	3221.2	2412.86	34165.7	1357.55	127.693	223.736	0.0693829	0.00481916
499.448	20.2698	47010.6	118491	5325.51	208834	3142.92	1910.41	33072.9	1037.8	129.257	613.733	0.0668556	0.0130552
500.155	20.2794	38288.5	99706.6	3676.3	276267	2696.72	3082.95	23883.3	1543.25	118.671	143.171	0.0704317	0.00373926
500.855	20.2889	37248.4	97728.6	3583.67	289799	2607.42	3248.3	23562.6	1563.5	111.851	171.793	0.0700009	0.00461209
501.563	20.2985	36665.1	95692.1	3385.81	293773	2584.64	3557.1	23131.6	1644.33	113.082	104.301	0.0704931	0.0028447
502.263	20.308	35916.8	95047.3	3463.19	300820	2457.51	3877.36	23060.3	1676.39	106.783	147.721	0.0684222	0.00411286
502.963	20.3175	37742.4	100538	3727.81	283953	2713.46	3440.14	23025.9	1523.71	118.053	111.849	0.0718942	0.00296348
503.671	20.3271	36850.5	96280.4	3413.42	290479	2617.36	3612.31	22984.8	1572.1	113.502	128.878	0.0710265	0.00349732
504.371	20.3366	36592.8	93726.8	3159.23	293626	2641.61	3873.62	22872.5	1652.93	113.315	103.882	0.0721895	0.00283887
505.078	20.3462	35293.8	91273.7	3087.31	297189	2433.57	4165.26	22051	1650.71	110.389	120.498	0.0689518	0.00341412
505.778	20.3557	34559	89802.6	2964.66	310363	2453.32	4090.77	21335.3	1653.39	107.334	121.753	0.0709894	0.00352304
506.486	20.3653	34953.1	91726.8	3079.82	301000	2456.98	4155.95	20994.8	1510.37	111.292	129.143	0.0702936	0.00369476
507.186	20.3748	32879	85310.8	2709.1	329838	2291.85	4951.68	20353.3	1754.89	99.2012	136.063	0.0697057	0.00413831
507.894	20.3844	34097.9	90260.7	3038.23	306945	2366.52	4384.56	20186.9	1597.49	109.235	134.128	0.0694038	0.00393361
508.594	20.3939	34457.9	90914.9	3083.71	306336	2392.1	4454.55	20856.6	1582.23	107.655	145.938	0.0694209	0.00423525
509.294	20.4034	33190	88072.9	2941.1	322227	2305.84	4703.45	20350.8	1689.34	102.011	138.692	0.069474	0.00417874
510.001	20.413	34278.2	90178.5	3026.76	313306	2384.97	4666.79	21238.9	1605.28	104.612	131.472	0.069577	0.00383542
510.701	20.4225	33989.8	90018.7	3077.07	317921	2352.74	4634.45	21231.5	1698.17	102.229	141.542	0.0692189	0.00416425
511.409	20.4321	34603.2	90467.4	3016.4	317491	2445.93	4678.48	21581.6	1664.38	103.349	124.646	0.0706849	0.00360215
512.109	20.4416	35376.8	93777.4	3258.35	298681	2452.72	4455.92	21484.2	1496.8	110.385	133.824	0.0693313	0.00378282
512.817	20.4512	35720.5	94194.3	3261.39	299965	2526.75	4101.88	21801.2	1563.18	111.398	114.211	0.0707369	0.00319735
513.517	20.4607	33415	86748.8	2863.14	319085	2291.15	4528.61	21118	1826.85	101.359	142.802	0.0685666	0.00427359
514.217	20.4702	31575.2	82715	2652.88	346642	2147.58	4792.27	20329.9	1840.74	91.936	159.99	0.0680147	0.00506693
514.924	20.4798	34340.9	91690.4	3128.7	309963	2412.2	4268.03	20690	1603.75	109.693	94.4619	0.0702429	0.00275071
515.624	20.4893	33926.8	89808	3023.07	311178	2372.3	4286.3	20653.7	1668.73	107.984	106.166	0.0699239	0.00312927
516.332	20.4989	33306.7	88137.4	2983.18	315135	2239.18	4579.29	20801.8	1632.91	102.548	156.946	0.0672291	0.00471213
517.032	20.5084	33995.9	90001	3065.94	309209	2336.66	4519.5	20804.1	1665.85	106.63	127.948	0.0687337	0.00376364
517.364	20.518	33402.6	87971.3	2943.66	325982	2300.74	4945.17	21449.1	1824.69	100.049	95.9904	0.068879	0.00287374
517.617	20.5275	34481.2	90365.9	3105.63	313071	2366.24	4478.4	22019.3	1745.63	102.75	139.999	0.0686241	0.00406015
517.873	20.5371	36884.2	97108	3402.55	288917	2669.5	4090.88	21795.5	1505.84	116.122	129.759	0.0723752	0.003518
518.127	20.5466	36284.8	96853.1	3457.21	293644	2567.06	4571.22	22074.1	1491.85	112.319	119.331	0.0707474	0.00328873
518.38	20.5561	35846.9	94991.5	3296.5	306282	2569.83	5026.66	22255.8	1595.06	107.704	97.5476	0.0716889	0.00272122
518.637	20.5657	37655.4	102891	4071.44	274807	2520.95	4374.48	23496.8	1373.57	115.484	145.163	0.0669478	0.00385504
518.89	20.5752	36307.9	95444.2	3451.08	292188	2496.33	4830.12	23213.4	1698.72	108.345	134.738	0.0687543	0.00371099
519.147	20.5848	36762.8	96228.2	3428.89	291180	2555.92	4581.01	23464.9	1575.82	110.158	121.597	0.0695247	0.00330762
519.4	20.5943	41296.1	105249	3886.65	259409	3033.66	3703.92	26633.5	1457.63	123.762	95.8021	0.0734611	0.00231988
519.656	20.6039	40362.8	104828	3891.64	267440	2977	3492.44	25937	1449.12	123.43	74.3213	0.073756	0.00184133
519.91	20.6134	50370.4	122986	5123.78	204899	3904.52	2109.77	34736.1	1195.52	144.276	113.342	0.0775162	0.00225017
520.163	20.6229	55430.4	131048	5824.44	178696	4350.1	1711.3	41146.6	1128.24	151.328	120.461	0.0784785	0.0021732
520.42	20.6325	76495.3	174697	11124.4	87418.6	6218.85	1078.53	62631.8	547.057	192.791	177.928	0.0812971	0.002326
520.673	20.642	81923.6	189718	13460.4	72736.4	6863.59	819.568	65362.1	429.033	209.801	169.677	0.0837804	0.00207116
520.93	20.6516	87396	200667	15732.6	61055.8	7232.09	817.065	74631.7	348.21	207.875	203.848	0.0827507	0.00233247
521.183	20.6611	80973.9	186085	12765	74936.4	6629.25	902.984	66893.7	393.606	202.667	188.305	0.0818689	0.0023255
521.439	20.6707	81346.4	188911	13436.9	72506.4	6628.39	897.095	67381.2	405.209	206.886	140.478	0.0814835	0.00172691
521.693	20.6802	81216.3	187990	13897.6	69550.7	6382.42	881.415	68972.3	397.928	200.091	263.209	0.0785855	0.00324084
521.949	20.6898	58274.6	138980	6213.3	153403	4998.78	1325.58	36636.6	840.956	180.874	151.907	0.0857797	0.00260674
522.227	20.7002	39919.7	102503	3843.43	270046	2833.86	3324.54	26360.5	1523.88	116.823	141.792	0.070989	0.00355192
522.539	20.7119	40373.8	104780	4016.85	262059	2825.95	3547.78	26573.2	1405.19	119.894	125.528	0.0699948	0.00310915
522.851	20.7236	45062.9	115036	4817.73	221392	3098.21	3601.15	31219	1210.65	130.632	128.532	0.0687529	0.00285227
523.164	20.7353	47791.6	122473	5532.74	199747	3220.73	3702.56	34377.9	1076.8	136.316	119.918	0.0673912	0.00250918
523.476	20.747	46700.7	118980	5440.84	208718	2991.21	3977.29	36359.6	1177.23	124.279	162.65	0.0640508	0.00348282
523.788	20.7587	47771.1	127143	6553.01	199065	3024.55	3358.27	35491.5	1193.76	130.031	193.656	0.0633134	0.00405383
524.1	20.7704	50536.3	146706	9313.17	187157	3347.83	2803.69	32562.4	1314.6	142.248	218.091	0.0662461	0.00431552
[truncated: 6,499 more rows]

## Sheet: n=22 (regular)
			Calibration samples (n=22; regular intervals), derived by WD-XRF on glass beads												Calibrated XRF-CS values for ODP 967 using 22 calibration samples
Depth [m]	Al [ppm]	Si [ppm]	K [ppm]	Ca [ppm]	Ti [ppm]	Mn [ppm]	Fe [ppm]	Sr [ppm]	Zr [ppm]	Ba [ppm]		Depth [m]	Al [ppm]	Si [ppm]	K [ppm]	Ca [ppm]	Ti [ppm]	Mn [ppm]	Fe [ppm]	Sr [ppm]	Zr [ppm]	Ba [ppm]
15.46	60153.3	163606	9449.28	137196	5251.63	1213.52	39276.8	733.935	182.958	560.009		0.03	74039.3	172716	13692.7	63977.8	5082.8	1072.78	81364.1	370.55	167.274	259.989
16.46	57244.7	144927	5803.57	152879	4239.64	3113.11	46032.8	759.889	137.811	121.98		0.04	86381.4	205302	16827.8	48085.7	6718.87	957.259	78905.3	295.812	203.779	195.976
17.46	75014.2	180320	9955.24	101667	5954.43	858.321	50817.2	529.74	206.444	161.355		0.05	93261.8	223925	18332.5	37858	7682.39	2129.29	62722.4	261.784	222.248	240.471
24.6663	67859.8	178426	11448.4	110323	4876.61	2182.13	50843.6	791.142	181.822	240.743		0.06	97180.3	225245	21301.5	30463.7	7625.46	780.754	86146.6	196.313	213.454	246.667
25.7309	60803.3	149688	6836.75	146731	4453.43	3455.04	46118.2	808.923	150.823	130.693		0.07	97589.1	226294	21506.4	29051.4	7709.84	739.012	90872.2	189.955	215.435	206.147
26.72	61076.1	162070	9837.32	133181	4618.95	2675.36	44664.9	600.264	175.679	177.464		0.08	90254.7	211193	18562.3	40331.6	6930.62	848.752	82288.6	249.452	203.767	242.389
28.54	92700	220200	19100	21900	8400	1400	82100	163.6	242.56	208.57		0.09	94885.8	220740	20403.7	33086.4	7418.39	743.409	88186	210.571	211.218	219.016
30.4	64700	154500	10100	137700	5000	2600	42700	733.01	166.14	483.9		0.1	76724.1	187334	13391.7	77280.5	5993.9	935.282	69687.6	437.905	194.911	168.552
31.86	66800	175800	12000	116400	5200	2700	44700	603.97	188.44	387.9		0.11	76030.5	184760	13312.5	75721.7	5845.69	965.84	71892.8	432.49	191.075	167.217
32.9622	55900	145700	7800	164100	4400	3000	36800	920.17	157.49	144.75		0.12	79085.5	187566	14802.1	58779.4	5864.43	847.417	85046.7	346.841	187.263	170.678
33.9778	45996.6	129998	7099.83	195654	3423.99	4888.43	40345.3	1013.67	146.403	125.426		0.13	77378.5	186125	13819.2	62406.7	5839.06	1420.56	74790.3	386.557	189.381	161.242
35.1031	57200	146000	10200	153200	4200	2200	42700	806.94	154.27	149.38		0.14	81846.8	191044	15899.4	45203.2	5921.17	1383.91	84426.4	291.956	184.91	204.918
36.1048	68000.7	156211	10677.7	105116	3846.72	801.585	47547.4	481.512	129.72	807.165		0.15	85878.7	197245	17688	33837.3	6157.05	1428.99	93772.8	232.171	186.294	194.663
37.1425	70592	156073	12534.2	86386	4774.28	916.327	76251.2	415.824	153.022	648.638		0.16	84691.4	193824	17371.2	34302	5965.79	1590.88	92187.3	235.938	181.777	215.392
38.1523	86643.2	203519	18596.8	55834	6790.62	657.345	67969.6	380.432	208.495	182.023		0.17	88990	202899	18966.7	28873.7	6400.29	1459.94	95776.6	203.781	189.021	204.37
39.17	63663.7	150065	7992.47	148665	4517.28	3675.09	41120.8	897.733	154.187	196.742		0.18	89353.1	206606	18510.9	33181.8	6621.88	1535.55	84124.1	227.54	195.637	233.238
40.17	51428.9	137158	6826.87	169543	4061.39	5249.07	34404.3	887.231	150.944	150.434		0.19	91482.9	213291	18942.2	32459.3	7008.04	1502.03	82440.2	224.63	204.564	207.982
41.17	71588.2	174882	11696.7	153983	5582.51	2352.39	45750.5	797.742	183.163	189.066		0.2	100136	226948	22949.1	19202.2	7559.93	2169.79	83879.4	149.173	206.05	280.822
42.17	50871	138176	7172.98	176060	4065.49	2954.02	32757.5	915.513	159.095	126.148		0.21	99136.4	224622	22676.7	18373.8	7467.58	2202.95	90383.4	146.571	205.101	218.1
43.17	41380.5	105385	3349.39	223146	3205.84	5546.01	23466.5	1430.54	142.746	122.028		0.22	94713	214698	21019.1	20705.3	6950	2415.28	91511.6	163.721	196.843	209.722
44.1679	33554.9	87940.9	5347.29	277379	2405.33	2532.42	58659.7	1387.08	111.477	115.429		0.23	90688.4	208681	19101.1	25115.3	6729.91	2403.55	91770.3	195.253	197.193	158.283
45.3118	57138.5	140107	7359.62	146429	4222.95	3021.26	38595.8	873.971	167.732	300.487		0.24	88838.2	203275	18742.4	29325.5	6426.43	1637.6	92572.9	208.971	190.208	204.556
												0.25	94811.8	218292	20567.6	24546.1	7227.46	1685.81	90607.7	182.714	205.693	180.862
												0.26	92020.4	212358	19384.9	25887.6	6908.1	2410.65	85389	197.857	200.514	189.04
												0.27	94989.9	219242	20535.7	24572.8	7291.68	1715.65	90168.5	183.756	207.456	173.113
												0.28	89091.6	201855	19590.5	29493.3	6390.41	679.491	114138	193.221	188.011	167.376
												0.29	81001.7	183957	16747.7	36410.4	5543.83	861.429	115450	237.405	173.128	147.921
												0.3	82153	186829	17201.4	34419.9	5715.26	716.7	123610	225.373	177.016	119.458
												0.31	78603.6	184517	15001.6	60048.5	5679.29	648.875	88549.5	338.747	181.214	204.085
												0.32	82124.3	190786	16351.2	50084.8	5922.91	648.748	92665.6	291.12	183.985	217.113
												0.33	85472.4	199732	17249.2	45329.9	6395.71	633.094	94191.9	271.038	194.581	180.173
												0.34	85248.2	200385	16928.2	50276.1	6432.75	659.216	84835.1	291.978	195.869	223.561
												0.35	87192.8	205290	17495.2	47196.5	6689.65	654.077	85564	278.384	201.178	208.44
												0.36	86738.5	202877	17540.1	46256.7	6528.24	675.442	86239.8	272.917	196.557	231.605
												0.37	88402.5	205196	18286.8	40787.8	6598.85	757.412	87908.2	248.65	196.137	242.662
												0.38	91586	216055	18800.1	41882	7241.88	688.705	82307.6	253.215	211.403	217.77
												0.39	90929.3	215326	18445.2	43513	7222.85	716.956	80734	262.831	211.981	212.067
												0.4	91204	214415	18760.8	40941.2	7131.34	750.334	82457.4	250.267	208.563	226.4
												0.41	89924.5	213775	17956.9	48427.2	7145.85	720.337	74551.9	283.336	210.839	255.811
												0.42	90238.5	214777	18045.9	45994.4	7219.75	734.568	78359.4	275.932	213.068	209.362
												0.43	86965.3	208802	16767.7	53262.8	6963.69	749.811	76246	313.432	210.508	191.959
												0.44	75755.3	182009	13534.5	70671.1	5666.21	894.231	78898.9	406.381	185.553	162.446
												0.45	80317.9	190853	15091.7	60251.7	6019.88	808.278	80114.2	348.092	190.203	202.513
												0.46	85727.8	201330	17111.1	45722.9	6486.68	737.878	89647.8	277.439	197.273	181.276
												0.47	86351.6	201228	17546.4	42363.9	6441.76	756.985	92246.6	260.494	194.699	191.539
												0.48	79844.9	185572	15695.1	46138.4	5713.55	769.14	105150	286.621	181.149	132.12
												0.49	79083.9	186847	14926.2	56161.5	5820.23	829.582	89388.8	335.168	185.904	158.045
												0.5	71484.1	171755	12391	81491.5	5196.7	932.386	76428.6	455.603	175.245	175.646
												0.51	68699.9	169641	11140.2	107462	5238.18	991.938	60934.6	569.939	179.549	190.365
												0.52	71818.2	176804	11934.5	97361.8	5538.06	1032.93	60312.9	525.138	185.502	211.506
												0.53	80000.7	190508	14959	60785	6020.53	794.882	81345.2	352.058	190.873	185.04
												0.54	79853.9	185372	15615.8	52612.3	5652.92	779.761	89802.1	307.824	178.41	231.399
												0.55	83664.3	192849	17068.6	43213.7	5989.5	711.066	97839.2	261.771	183.899	204.712
												0.56	93876.5	213445	21190.6	27051.2	6993.36	584.625	111283	176.744	199.171	172.47
												0.57	96217.2	219595	21842.9	26689.5	7316.67	580.988	105700	173.715	205.315	187.647
												0.58	96454.8	221118	21764	27173.1	7424.39	570.261	105020	176.695	208.327	175.599
												0.584706	103615	236935	24510.4	23671	8244.2	496.901	96987.3	152.275	220.054	238.701
												0.595294	103317	235934	24404.4	24162.7	8164.93	512.539	94844.9	154.361	218.241	264.031
												0.605882	104727	240472	24752.8	23977.7	8463.27	475.243	94533.5	153.052	224.504	240.231
												0.616471	105511	241157	25228	23486.2	8458.59	472.789	92730.7	148.817	222.805	281.567
												0.627059	100406	231323	22887.5	28997.4	7945.86	496.832	90808.7	178.463	217.077	267.648
												0.637647	98888.1	229568	22030.2	31144.5	7900.38	510.884	90460.1	191.589	218.624	231.981
												0.648235	97969.5	226360	21866.2	30855.4	7694.88	540.245	91461.1	190.673	213.963	244.168
												0.658824	99133.5	228677	22351.4	29672.4	7809.33	534.557	91168.7	183.992	215.324	253.484
												0.669412	94177.8	221956	19770.1	35627.9	7582.03	677.542	89718.6	225.802	217.913	162.974
												0.68	85689.1	200744	17068.7	49404.8	6405.83	793.473	79162.1	289.151	194.004	283.048
												0.69	96558.3	224825	20952.7	33316.7	7632.02	667.815	85281.9	207.589	214.699	247.459
												0.7	86029.6	201437	17179	46497.2	6440.65	878.337	81233.9	280.39	194.867	252.771
												0.71	59055.6	144228	9016.72	123690	4085.25	1634.56	60921.5	672.693	150.917	190.013
												0.72	44913.5	114118	5779.71	221833	3108.11	2119.17	40786.2	1099.84	126.924	177.799
												0.7275	63793.4	156227	10059.9	107204	4598.19	1447.44	65518.9	600.169	164.459	156.363
												0.735	70353	169277	12018.7	80771	5084.94	1172.91	75639.4	466.058	173.268	162.782
												0.7425	58805.1	144250	8913.99	127947	4110.59	1523.54	60718.8	689.107	152.169	177.258
												0.75	60114.1	147051	9232.04	117925	4209.33	1589.25	64130.8	653.057	154.761	160.155
												0.76	63656.2	154003	10244.3	99039.5	4451.5	1398.99	72400.3	562.419	159.646	150.745
												0.77	47765.3	120382	6336.63	183494	3295.5	2151.16	53110.4	982.831	133.946	107.278
												0.78	60474.8	146964	9441.06	110539	4184.81	1413.63	71626.1	618.799	153.947	136.647
												0.79	70277.1	167570	12204.2	77566.6	4970.07	1102.01	79307.8	446.118	169.225	173.42
												0.8	75222	180023	13489.1	68336.2	5559.46	911.865	82702.2	398.319	182.911	150.49
												0.81	84683.3	201166	16403	50163.7	6529.97	824.542	84054.7	304.066	200.571	170.372
												0.82	79142.5	188882	14580.9	60735.1	5939.87	1028.47	78041.7	361.769	189.646	185.305
												0.83	81820	194233	15538.7	52509.9	6183.54	955.165	84691.8	321.791	193.914	161.682
												0.84	72580.5	175074	12481.4	75362.5	5341.91	1414.27	71619.1	447.762	179.085	174.007
												0.85	65183.6	158147	10555	98209.5	4636.59	1368.19	69554.7	554.301	164.108	163.835
												0.86	69974.4	168165	11978	80685.5	5039.17	1070.31	79162.3	463.881	172.346	148.459
												0.87	72495.9	174295	12628.1	73436.9	5317.66	1060.14	81445.1	432.082	178.806	135.742
												0.88	82498.4	193388	16051	49709.9	6060.82	990.213	83175.6	302.58	188.25	221.576
												0.89	86960.9	207717	16777.9	45956.1	6857.76	1244.97	76007.3	294.922	207.583	180.884
												0.9	98678.1	230980	21163.2	29060.3	7936.74	1427.31	72762	200.025	220.28	278.957
												0.91	101650	237359	22195.7	26058.9	8248.83	1736.02	67807.6	184.608	223.941	334.453
												0.919167	101206	236250	22025.1	25994.2	8182.24	1865.51	67418.9	185.657	222.755	335.307
												0.928333	103852	241072	23346.6	22608.9	8454.55	1554.76	74280.1	164.242	226.228	282.37
												0.9375	98240.1	226036	22116.9	25540.2	7678.75	757.023	97897.2	172.722	213.235	183.731
												0.946667	95866.4	218201	21734.6	27666	7201.62	612.514	101008	177.531	202.331	230.228
												0.955833	90989.1	208954	19584.6	34203.7	6752.05	705.855	95458.6	214.437	196.705	230.78
												0.965	90206.4	210338	18775.5	37489.3	6903.21	757.367	91697.4	236.061	203.224	188.127
												0.974167	88515.5	207607	18034.2	39565	6802	802.589	92192	250.764	203.086	161.491
												0.983333	84631.3	199259	16647.4	45285.7	6394.39	907.496	89376.6	283.675	196.341	161.89
												0.9925	79088.1	188279	14662.5	58334	5910.09	986.122	82853.6	351.521	188.992	162.913
												1.00167	78634.3	189728	14157.7	63519.7	6040.85	1103.47	76434.7	382.85	194.214	153.195
												1.01083	76619.9	185100	13568.2	65566.3	5829.39	1209.1	77704.8	399.664	190.444	137.084
												1.02	74450.3	179028	13083.4	69150.6	5518.67	1241.43	77150.9	415.309	182.793	153.427
												1.02889	71880.9	174059	12243.2	77023.7	5324.56	1349.5	73978.8	458.693	179.851	146.22
												1.03778	55940.4	138841	8127.63	144283	3944.18	1747.89	55988.1	774.326	149.281	161.111
												1.04667	42905.5	109515	5368.93	226706	2950.49	2393.78	43119.9	1159.97	123.707	124.899
												1.05556	45219.8	114884	5821.49	209734	3130.69	2079.75	47201.4	1079.56	129.057	118.881
												1.06444	47765.3	120094	6350.11	183063	3271.71	2322.77	51101.3	979.401	132.667	124.251
												1.07333	46778.9	116487	6254.65	188493	3098.79	2564.82	46205.5	981.864	125.627	196.45
												1.08222	46675.8	115630	6313.76	195019	3055.99	2237.67	43932.8	974.363	123.037	263.44
												1.09111	45965.1	113698	6186.78	200785	2979.06	2511.86	40147.1	992.538	119.981	336.581
												1.1	43139.6	105897	5780.38	225377	2692.96	2108.5	36649.4	1037.61	109.811	496.926
												1.112	46333.3	112897	6387.49	196617	2891.72	3003.3	34884.8	948.839	114.624	680.813
												1.124	46131.8	108898	6736.76	179229	2660.3	1671.26	49467.9	837.382	106.789	581.308
												1.136	46310.1	109562	6749.2	182757	2689.75	1724.47	46464.4	845.841	107.378	661.899
												1.148	63231.9	150331	10453.2	103423	4216.5	1233.3	66667.1	549.181	149.932	295.228
												1.16	65218	155274	10930	91320.2	4433.84	1206.14	75307.8	508.851	156.415	199.862
												1.16812	58332.4	137955	9365.88	116346	3706.27	1368.44	65363.1	606.254	136.674	323.135
												1.17625	46073.7	107279	6856.25	169687	2559.57	1792.93	51038	797.511	102.786	704.588
												1.18437	46969.6	110378	6949.04	173905	2693.06	1746.61	48190.2	811.491	107.023	700.237
												1.1925	51790.4	122189	7928.93	152373	3114.41	1538.37	51936.4	730.006	119.314	592.928
												1.20062	55688	130999	8822.24	128562	3419.28	1505.39	58639	646.318	127.821	473.689
												1.20875	53918	124748	8637.13	122110	3130.66	1658.44	63381.7	623.494	118.912	507.866
												1.21688	51648.5	118806	8203.8	128564	2905.25	1661.5	63404.1	645.658	112.299	553.891
												1.225	46187	106672	6960.54	158723	2513.46	1813.77	56257.3	762.846	101.366	632.11
												1.23312	50945.7	117077	8045.89	134397	2839.91	1792.71	58390.1	663.734	109.899	700.942
												1.24125	51132.9	117485	8124.37	136833	2859.63	1487.5	60011.6	660.923	110.406	686.085
												1.24937	55176.1	128216	8901.73	123763	3276.79	1356.01	63721.1	618.269	123.062	491.709
												1.2575	51981.8	116271	8663.46	100845	2735.88	1822.8	80331.9	541.929	106.112	476.748
												1.26562	50967.7	114516	8374.91	109138	2692.85	1666.52	78581	572.351	105.316	469.658
												1.27375	51409.9	117249	8278.23	112655	2831.75	1629.18	78694	598.273	110.843	343.28
												1.28188	47659.2	109880	7324.54	144728	2620.19	1463.12	67352.3	712.175	105.225	420.451
												1.29	51438.8	120002	8016.46	136356	3004.25	1329.62	66939.2	679.233	116.906	366.715
												1.30017	60578.1	145614	9560.09	111601	4057.86	1898.85	59480.1	613.269	147.473	281.868
												1.31033	62803.3	154179	9752.81	117617	4509.69	1729.31	54827.7	640.22	161.114	240.142
												1.3205	62111.2	152215	9667.74	120680	4430.84	1423.44	58097.9	643.735	159.26	219.907
												1.33067	59180.8	143914	9132.07	125359	4058.08	1440.66	60716.7	664.367	149.292	219.206
												1.34083	62391.3	152481	9738.81	110207	4422.3	1691.52	62572.3	618.681	159.6	177.375
												1.351	64415	159647	9979.99	111892	4797.16	1614.47	59444.7	628.08	170.581	158.052
												1.36117	64667.1	157697	10368.2	109001	4644.76	1206.99	63962.2	587.372	164.223	196.754
												1.37133	62234	151990	9765.73	117662	4409.31	1322.69	61341.5	628.668	158.595	205.656
												1.3815	61971.5	152728	9561.93	120478	4485.43	1358.39	61402.6	651.746	162.154	166.225
												1.39167	60123.1	147112	9244.21	126513	4213.61	1471.06	57852.2	670.087	153.71	222.956
												1.40183	59247.8	147435	8764.9	137556	4296.5	1917.58	49811.4	737.423	157.458	220.91
												1.412	61189.6	153552	9075.78	131244	4600.64	1722.3	53608.4	718.997	167.16	155.796
												1.42217	56443	140947	8184.8	152985	4065.38	1510.66	52328.5	792.556	152.416	180.631
												1.43233	55237.4	137801	7947.03	155843	3934.34	1545.74	53183.6	809.02	149.106	171.254
												1.4425	56533	141813	8154.77	155415	4125.48	1442.56	52358.5	803.336	154.642	165.328
												1.45267	57240.7	143715	8272.1	150085	4202.68	1547.56	52961.6	790.609	157.015	155.574
												1.46283	54948.2	137004	7885.7	157513	3897.31	1641.99	51383.5	816.052	147.776	187.921
												1.473	53010.2	132732	7451.38	171369	3750.63	1682.4	48033	870.82	143.901	199.66
												1.48317	52339.3	132413	7195.05	176906	3784.07	1773.48	47801.3	912.805	146.43	156.417
												1.49333	50832	127685	6982.7	176331	3567.7	1745.2	51513.3	913.994	140.317	143.3
												1.5035	46652.3	117460	6172.18	202957	3192.36	1971.31	45580.5	1021.65	129.165	169.819
												1.52383	52411.9	134153	7092.95	188585	3913.51	1759.1	43009.6	955.942	150.461	164.246
												1.534	58125.7	147451	8352.2	163739	4419.52	1395.74	45081.4	821.769	162.156	207.32
												1.54417	69375.1	170663	11371.4	110307	5258.1	963.256	55748.4	565.994	178.083	275.341
												1.55433	79361.4	191820	14378.9	70221.3	6155.3	796.968	72530.5	394.455	196.01	194.978
												1.5645	80027.7	191360	14828.1	67485	6065.43	769.842	72331	374.179	191.504	251.107
												1.57467	82735.3	196543	15823	59581.1	6288.47	695.249	77282.1	335.495	194.891	240.362
												1.58483	70701.1	173534	11756.7	104910	5379.39	880.785	58592.3	540.903	180.765	257.473
												1.595	68870	171003	11104.4	116484	5333.92	896.967	55364.6	593.273	181.528	233.103
												1.60517	70197.6	173147	11533.6	108061	5389.01	914.183	57374.8	558.275	181.83	242.991
												1.61533	72839.3	180091	12144.7	97354.7	5726.46	881.351	62077.4	520.681	190.681	185.781
												1.6255	75513.1	184166	13055.4	80192	5824.59	1070.34	65946.7	453.122	190.631	196.659
												1.63567	74471.9	181642	12817.6	84854.1	5714.62	945.456	66301.2	467.363	188.214	200.285
												1.64583	73828.5	180958	12535	90520	5705.4	979.773	61963.1	491.208	188.389	219.559
												1.656	72305.7	177829	12104.3	100176	5583.88	903.885	58662.7	524.294	185.738	245.9
												1.66617	72146.5	179064	11902.4	101722	5702.77	873.092	60707.8	539.382	190.744	182.853
												1.67633	62796	158351	9451.47	146048	4859.35	1108.21	47663.3	727.52	172.089	229.132
												1.6865	59468.5	152514	8506.06	164820	4702.09	1238.23	45406.8	827.273	171.026	167.719
												1.69667	51458.7	132763	6874.03	208386	3913.04	1519.24	38636.4	1007.72	150.091	189.444
												1.70683	52472.4	135357	7064.92	204187	4016.94	1513.23	38231.7	987.597	152.685	200.856
												1.717	57295.2	146958	8048.92	173425	4460.59	1413.75	43292.8	869.564	164.646	179.037
												1.72717	51921.8	133211	6999.64	197042	3895.71	1587.39	41790.1	975.61	149.81	171.696
												1.73733	52480.1	135870	7011.48	200486	4050.7	1583.17	40246.2	994.256	154.9	158.027
												1.7475	54223.7	139893	7381.53	192193	4198.16	1535.89	40032.4	949.93	158.072	181.753
												1.75767	50944.5	131633	6754.71	212968	3872.69	1674.7	36216.6	1027.6	148.64	212.534
												1.76783	57105.9	146962	7974.54	177644	4480.7	1415.62	41866.6	885.166	165.31	182.421
												1.778	60346.5	154600	8691.64	163493	4783.15	1308.99	42596.4	815.322	172.089	206.912
												1.78817	62357	158834	9211.22	155119	4939.23	1151.78	43950.2	766.311	174.941	228.779
												1.79833	70859.8	180071	11126.3	120936	5887.69	1022.64	48706.2	626.067	197.514	201.137
												1.8085	97123.2	239469	18915.7	64581.5	8714.6	668.849	41295.6	329.402	241.054	755.368
												1.81867	105975	261182	21793.7	54920.3	9977.59	564.064	36929.7	276.353	259.373	1074.82
												1.839	53461.4	137268	7293.39	193608	4066.82	1507.34	40605.6	949.89	154	192.068
												1.84917	54618.8	141966	7353.06	191441	4317.82	1710.83	39054.1	965.477	162.34	162.009
												1.85933	53879	139539	7243.84	193228	4194.39	1845.77	37931.3	971.8	158.299	184.625
												1.8695	51299.7	133537	6706.04	208626	3973.67	2056.82	35583.1	1044.77	152.695	181.529
												1.87967	57733.5	148173	8092.64	168879	4503.72	1695.96	41719.4	865.111	165.726	189.148
												1.88983	61073.3	155122	8915.09	150380	4742.23	1553.11	44321.7	775.147	170.334	215.611
												1.9	66658.2	167379	10327.6	124556	5218.91	1258.91	50144.6	651.991	180.574	218.212
												1.912	65014.9	163529	9929.83	132288	5057.18	1310.78	48020.5	684.068	176.675	232.575
												1.924	60262.6	152780	8755	151809	4626.87	1705.44	43310.8	785.007	167.052	231.706
												1.936	66314.6	167251	10145.7	123554	5231.02	1458.83	49938.7	663.933	181.976	191.508
												1.948	74632.7	181780	12802.4	84174.8	5688.6	1246.75	59668.5	469.751	186.483	263.261
												1.96	71354.4	176050	11731.3	97022.8	5505.3	1245.89	58328.3	534.533	185.148	210.47
												1.972	70307.3	174683	11330.2	100832	5480.74	1359.05	57285.2	561.363	186.059	184.841
												1.984	70708.9	174615	11547.3	98763.8	5442.74	1304.07	57591.8	544.823	183.88	210.88
												1.996	69108.9	170841	11145.5	108699	5276.21	1302.88	52679.4	578.885	179.297	268.098
												2.008	76451.9	186518	13264.9	78918.8	5928.07	1151	63065.5	447.455	192.45	220.017
												2.02	75166.5	182989	12995.2	85406.5	5750.7	1047.18	60564.4	465.742	187.62	269.009
												2.02643	83903.2	202562	15665.2	63654	6661.98	785.144	68465.2	358.576	205.061	240.849
												2.03286	90684.5	216313	18092.2	49396.2	7295.78	686.793	72483.3	285.794	214.135	264.373
												2.03929	93665.4	223404	19095.1	45591.2	7681.65	604.603	74162.1	264.846	221.093	252.053
												2.04571	93811.6	223409	19195.3	43686.7	7677.3	633.244	76132.8	258.34	220.905	234.492
												2.05214	95540.5	228457	19680.9	42148.4	7994.61	568.322	78012.6	250.31	227.795	202.996
												2.05857	95520.3	226637	19887.4	40830.1	7827.6	622.449	76640.1	243.196	222.461	246.575
												2.065	94628.5	224540	19569.8	42633.9	7707.22	630.408	75053.6	251.091	220.193	264.703
												2.07143	92586.9	220920	18650.8	46747.1	7531.29	730.998	70475.9	274.121	218.173	278.567
												2.07786	82971.1	202929	15043.5	69708.4	6757.56	834.749	64327.7	391.099	209.655	217.862
												2.08429	76536.7	187614	13228.4	86745.9	6014.14	936.653	59380.7	467.48	194.35	256.067
												2.09071	71721.7	178391	11669.8	102929	5659.28	1216.8	53830.1	556.084	189.282	227.834
												2.09714	70336	173670	11472.7	105616	5398.91	1222.48	53212.4	560.97	181.805	274.291
												2.10357	73598.8	181469	12354.1	96777.9	5761.35	970.787	57502.3	514.206	190.006	243.653
												2.11	77769	190580	13580.8	85880.9	6157.66	844.651	59107.1	456.828	197.046	270.878
												2.11964	80626.8	197497	14368.6	77393.4	6496.21	807.212	62100.3	421.532	204.378	238.49
												2.12929	77148.6	190207	13269.8	87931	6175.9	906.51	58483.7	473.025	198.855	239.581
												2.13893	74389.2	185111	12348.7	96241.4	5986.37	1040.61	56578.3	521.606	196.862	205.748
												2.14857	73193.4	181456	12114	97531.4	5787.61	1103.05	56420	528.182	191.778	220.043
												2.15821	71745	179118	11626.3	105760	5721.53	1121.6	53712.3	565.259	191.327	216.556
												2.16786	70245.3	175550	11242.2	108124	5562.19	1183.89	54794.2	582.973	188.378	194.249
												2.1775	70768.8	176826	11352.8	104032	5616.45	1263.32	55793.9	571.771	189.884	181.571
												2.18714	71239.4	176757	11579.4	99812.2	5565.85	1333.39	55685.6	550.899	187.258	210.135
												2.19679	72824.3	180339	12014.8	95965.2	5721.75	1246.07	56113.5	528.19	190.217	220.474
												2.20643	70139.5	174362	11303.6	105414	5473.62	1227.69	55591.5	571.175	185.486	206.307
												2.21607	68490.7	169535	10983.6	109733	5228.69	1274.26	54289.3	586.544	178.84	238.146
												2.22571	68711.7	169390	11105.1	106662	5198.19	1287.76	55314.1	572.826	177.544	245.609
												2.23536	70364.9	172366	11624.6	97054	5296.86	1260.14	59066.7	531.434	179.154	234.717
												2.245	72416.7	177888	12097.6	91833.5	5569.34	1157.06	61405.7	508.575	186.082	203.144
												2.25464	71920.9	176530	11988.1	90298.3	5504.48	1192.96	63753.7	507.152	184.979	181.69
												2.26429	73299.8	177564	12629.9	78994.4	5487.34	1128.07	71314.4	453.958	182.851	173.603
												2.27393	74218.5	179179	12953.5	74425.5	5547.06	1105.89	74238.5	433.042	183.765	165.725
												2.28357	72707.4	174888	12611.2	78262.1	5323.43	1178.96	71016	448.183	177.763	201.767
												2.29321	74331.6	180614	12814.9	73799.7	5644.73	1255.21	73400.3	440.263	187.362	143.404
												2.30286	75175.2	183557	12930	73372.4	5810.35	1247.81	72849.4	440.209	191.938	132.652
												2.3125	74931.6	184817	12586.3	81630.6	5904.35	1460.48	61501.2	479.381	194.57	173.288
												2.32214	72972.7	181541	11971.1	94961.5	5810.97	1219.61	58416.7	530.208	193.688	177.356
												2.33179	69438.2	171800	11213.9	104456	5327.79	1281.55	56406.2	568.039	181.448	215.154
												2.34143	69521.3	173086	11136.1	106835	5427.21	1209.57	56721.8	580.072	185.006	187.726
												2.35107	72600.8	179053	12071.6	88715.1	5652.62	1167.69	65363.6	504.619	189.556	152.873
												2.36071	68785.8	169898	11098.7	105999	5235.47	1240.44	57087.8	572.527	179.11	216.362
												2.37036	62440.3	155903	9470.87	133934	4685.5	1353.01	51580.2	697.353	167.39	212.58
												2.38	64100.3	160968	9730.12	126237	4931.58	1436.73	53293.2	679.663	174.878	170.143
												2.38833	56883.4	143697	8090.58	155911	4223.82	1870.56	47251.8	823.558	157.6	179.67
												2.39667	51058.1	131248	6707.21	181812	3789.97	2879.52	42638.5	993.932	148.638	131.083
												2.405	52129.2	133550	6926.36	173820	3860.55	3107.28	42275.3	960.604	150.036	145.387
												2.41333	56643	142768	8010.65	147291	4157.55	2531.6	47422.7	815.76	156.083	171.344
												2.42167	61310.7	154451	9000.36	132023	4645.89	2180.02	48536.9	733.631	168.182	180.408
												2.43	65782.7	164492	10090.7	114840	5039.17	2030.2	49848.1	644.867	176.28	210.086
												2.43833	68957.6	172382	10814.2	102558	5389.32	2006.93	52358.6	592.876	184.829	187.339
												2.44667	70046.1	174758	11143.4	101906	5495.32	1666	53486.6	576.533	186.756	195.417
												2.455	70766.9	176289	11364.3	102628	5560.56	1494.99	52730.6	568.706	187.518	219.09
												2.46333	71321.4	177487	11553.2	103394	5618.34	1275.6	53609.7	561.527	188.522	224.337
												2.47167	74038.8	184445	12218.4	98683.6	5954.84	1122.3	53683.7	532.53	195.883	230.21
												2.48	78505.8	193865	13566.2	84960.4	6357.19	961.198	57108.5	462.265	202.771	245.266
												2.48897	79440.3	196890	13725.5	82049.5	6531.01	982.84	58273.7	455.009	207.539	211.447
												2.49793	73607.2	183250	12133.1	100309	5896.23	1092.07	53694	537.266	194.43	234.85
												2.5069	74161	185231	12191.7	97861.7	6008.44	1150.83	54265.9	533.865	197.828	208.864
												2.51586	71409.8	177450	11598.1	102101	5607.15	1291.14	54002.5	556.383	188.067	225.73
												2.52483	71361.3	177744	11536.6	98970.8	5636.17	1344.46	56999.6	553.483	189.979	179.419
												2.53379	69239.8	172251	11047.7	104374	5376.11	1408.84	56365.6	579.213	183.854	185.561
												2.54276	72807.6	180883	11912.4	92767.3	5760.44	1453.98	56927.5	528.369	192.216	187.231
												2.55172	73507.7	181630	12194.7	91750.7	5760.2	1402.44	55435.8	514.198	190.566	232.219
												2.56069	72190.6	179033	11791.3	97035.7	5659.68	1464.5	53614.5	540.272	188.872	232.913
												2.56966	68540.6	172238	10671.5	111848	5423.77	1666.94	50179.6	620.123	185.907	200.471
												2.57862	59822.4	152819	8482.45	147655	4647.21	2552.52	41321.7	809.757	169.094	199.998
												2.58759	61271.8	155146	8907.75	137199	4699.4	2372.7	44212.7	756.153	169.438	207.458
												2.59655	62428.6	157981	9167.21	128607	4821.16	2205.81	48935.2	724.96	173.425	160.929
												2.60552	63738.6	159099	9693.97	124862	4802.33	1813.36	49038.7	676.473	169.993	232.407
												2.61448	69071.2	172450	10930.8	107921	5401.34	1489.06	53106.1	595.062	184.54	202.105
												2.62345	68550.4	172301	10709.2	115266	5438.1	1411.1	50682	623.353	186.129	203.387
												2.63241	66111.1	166565	10104.6	122926	5190.77	1542.56	49622.3	664.149	180.842	196.144
												2.64138	65497	164804	9985.69	122547	5104.74	1568.11	51014.9	666.606	178.956	183.728
												2.65034	68934.9	171614	10960.1	101824	5353.1	1452.64	59366.7	576.869	184.175	154.001
												2.65931	63834.6	160979	9556.21	125620	4941.65	1829.83	50455	694.866	175.688	169.98
												2.66828	64686.4	162613	9773.64	121345	4989.98	1963.84	49354.3	675.432	176.035	192.45
												2.67724	67801	170489	10485.4	109828	5348.76	1733.59	53424.5	622.935	185.212	160.612
												2.68621	69835.5	174750	11044.1	102949	5514.3	1652.95	53982.2	584.364	187.943	178.219
												2.69517	70221.5	175745	11147.1	99604.5	5567.29	1562.01	57538.4	572.495	189.887	148.891
												2.70414	68571.6	171584	10762.2	109120	5372.13	1590.1	52538	606.205	184.332	194.258
												2.7131	69477.1	174604	10861.4	110282	5524.18	1832.03	47095.8	612.396	187.504	237.361
												2.72207	67018.5	170602	10037.7	120925	5405	2492.63	41648.9	682.418	186.454	231.308
												2.73103	73816.9	185509	11870	95416.3	6030.75	1843.13	49099.6	549.382	199.179	214.057
												2.74	78247.7	194808	13145.1	82788.5	6412.71	1815.11	48528.6	480.785	204.71	277.238
												2.75017	73374.2	183829	11815.3	98542.2	5926.78	1893.7	46054.8	555.917	195.387	275.442
												2.76035	64825.7	163090	9779.65	124255	5010.57	2105.91	45372.5	683.477	175.722	238.858
												2.77052	67765.1	171286	10350.4	113913	5402.98	2082.98	47264.7	645.346	186.282	196.464
												2.7807	65424.7	164727	9897.67	121922	5086.91	2100.37	45859.4	674.963	177.797	228.915
												2.79087	60791.6	155491	8669.24	146155	4770.77	2465.25	40741	798.278	172.115	207.511
												2.80105	56503.3	144792	7764.54	161204	4321.04	2982.25	39047.9	882.34	161.051	200.152
												2.81122	60350.4	155113	8455.55	143944	4764.38	3400.21	38418.9	817.926	172.691	201.11
												2.8214	61915.8	158379	8778.91	130025	4861.67	4560.7	37422.6	772.275	174.266	226.318
												2.83157	64787.1	164244	9482.59	114342	5059.88	5057.12	37803	696.957	177.432	267.26
												2.84175	73580.2	183104	11848.1	78421.5	5823.69	3699.72	50190.8	508.429	193.626	197.399
												2.85192	71421.4	176789	11451.8	83168.1	5504.54	3402.95	51299	525.916	185.653	211.47
												2.8621	73281.1	179390	12230.3	75241.3	5589.64	2243.48	62216.5	470.745	186.754	170.049
												2.87227	74322.9	183085	12309.5	72514.7	5785.33	2785.39	59174.2	469.193	192.079	162.038
												2.88245	74866.5	184018	12437.9	70184.2	5801.97	3394.07	55417.3	460.968	191.338	195.331
												2.89262	74184.4	181306	12407.9	71868.4	5646.95	3040.74	56260.1	460.902	186.776	218.502
												2.90429	73165.8	178157	12223.3	72345.9	5481.63	3129.57	56896.7	463.807	182.561	225.697
												2.91464	75360.2	184036	12756.6	69909.7	5777.14	2649.14	58492.2	445.791	189.648	206.446
												2.925	67220.2	166122	10545.4	102113	5027.4	2714.49	48276.7	594.396	173.634	277.224
												2.93536	67541.9	165929	10767	104319	4995.38	2196.44	48403.3	583.604	171.433	335.166
												2.94571	70160.4	173696	11247.5	97940.4	5383.74	2151.9	49602.6	561.799	182.014	269.299
												2.95607	69566.3	171614	11260	104788	5290.52	1477.39	51850.1	567.523	179.176	284.467
												2.96643	71816.8	177406	11759.3	93234	5559.14	1586.35	55852.4	530.103	186.421	217.892
												2.97679	72686	178920	12057.2	91617.5	5610.31	1465.96	55958.8	514.816	186.651	240.799
												2.98714	73273.6	182074	11996	95907	5805.73	1567.78	50783.6	535.239	191.886	259.416
												2.9975	75911	189001	12609.3	87307.6	6148.78	1539.45	53365.8	501.324	200.278	216.597
												3.00786	77685.6	194228	12924.4	84753.6	6416.8	1763.16	49471	493.151	206.08	240.272
												3.01821	69626.1	175169	10832.5	110969	5543.51	2239.51	42444	619.153	187.11	298.623
												3.02857	69231.7	173834	10887.6	110167	5504.08	1379.66	53611	605.239	188.089	177.564
												3.03893	73027.4	182429	11898	99800.6	5873.88	1230.98	54070.5	546.984	195.027	205.055
												3.04929	69533	174836	10914.8	114984	5550.59	1487.01	47271.3	617.505	187.908	246.978
												3.05964	71494.7	179654	11413.4	107997	5778.29	1287.83	50940.1	584.355	193.575	211.395
												3.07	75563.6	187424	12527.8	84520.8	6030.64	2037.05	50364.1	497.621	196.517	256.869
												3.08182	77755.6	192170	13130.2	78137.1	6227.33	2202.71	49099	466.743	199.501	294.116
												3.09364	79698.4	195144	13858.6	69437.9	6318.08	2095.98	53133.2	422.838	199.979	286.433
												3.10545	81832.1	201874	14339.6	67392	6722.49	1576.18	58223.5	409.833	210.811	200.87
												3.11727	77115.4	189823	13075.6	77153.9	6097.06	2061.42	52342.5	461.561	196.573	268.732
												3.12909	74717.3	186044	12312.4	92486.2	6006.52	1533.46	51285	520.749	196.758	243.774
												3.14091	72407.2	181307	11633.2	100628	5816.59	1635.25	49499.1	562.825	193.616	233.087
												3.15273	75580	190740	12179	90338.7	6301.65	2088.6	47860	534.475	205.817	204.321
												3.16455	77769.6	192112	13203.6	76581.4	6239.83	1814.34	54923.6	458.135	200.839	223.631
												3.17636	73986.8	181878	12438.5	84946.7	5750.26	1336.32	61509.9	487.094	190.378	191.158
												3.18818	63626.4	161147	9435.81	136495	4968.63	2025.4	41657	728.331	174.892	264.964
												3.2	69729.7	175842	10870.9	112854	5604.7	1750.57	45948.4	620.14	189.655	240.763
												3.21182	71818.7	180607	11428.6	107357	5813.57	1554.44	46972.1	586.513	193.744	251.689
												3.22364	76208.5	190323	12598.4	88219.4	6225.22	1659.49	50725.7	507.322	202.067	231.552
												3.23545	72068.7	182937	11310.3	110371	5982.49	1609.69	45145.6	605.703	199.105	228.885
												3.24727	70285.3	178888	10830.9	115399	5803.06	1814.7	43790.5	636.473	195.545	225.448
												3.25909	68996.1	175365	10550.4	121176	5625.85	1978.39	40606.6	658.112	190.37	280.951
												3.27091	72944.9	183528	11749.2	108571	5970.3	1196.68	48333.4	575.853	197.21	248.654
												3.28273	81225.7	199173	14447.1	69467.6	6579.95	1049.73	65052.7	404.299	207.263	184.523
												3.29455	79205.1	190819	14398.8	62928.5	6095.4	951.535	79017.8	374.557	195.135	149.208
												3.30636	79417.7	190816	14476.6	62649.5	6065.01	1056.33	75218.9	372.892	193.453	179.212
												3.31818	79554.9	194073	14107.8	70516.9	6295.58	1101.57	66034.2	410.077	200.472	193.717
												3.33	80294.5	192299	14803.8	59046.7	6119.54	1078.94	76964.6	356.555	194.012	176.734
												3.34182	79720.6	191131	14544.3	60477.2	6050.85	1302.9	71768.4	367.592	192.363	203.422
												3.35364	82592.6	198774	15158.6	53039.4	6424.72	1827.95	68112.7	343.637	200.492	195.963
												3.36545	74894.5	180985	13037	73283.6	5615.28	1377.8	68323.2	432.921	184.8	197.158
												3.37727	74029	178324	12956.4	73424.4	5497.82	1105.71	75670	428.704	182.41	163.473
												3.38909	76152.7	183713	13497	68387	5758.7	1086.04	77193.2	406.359	188.445	149.683
												3.40091	73585.5	177942	12765.8	78632.7	5500.32	1030.74	72675.4	447.647	182.823	174.992
												3.41273	76590.9	188822	13029.8	78907.9	6093.35	1372.73	61295.4	461.952	198.314	181.108
												3.42455	74276.6	186402	12058.2	96407.4	6076.9	1500.19	50878.4	542.272	199.988	211.494
												3.43636	73630	185731	11705.8	96655.2	6051.76	2255.37	45172	563.105	199.693	238.551
												3.44818	73226.8	183394	11902.2	98683.6	5938.45	1214.62	55560.7	546.178	197.36	179.268
												3.46	85598.9	204574	16407.9	50673.4	6708.9	1012.44	76373.9	311.13	204.787	190.792
												3.46923	86946.1	207888	16766.8	47222.4	6875.13	1141.76	75985.1	298.472	208.097	182.905
												3.47846	84939.6	202624	16322.3	51771	6614.45	871.473	79764.4	312.503	202.81	181.699
												3.48769	81855.4	195218	15338.8	57225.7	6226.44	1068.12	74161.6	342.361	194.687	218.429
												3.49692	86799.1	207316	16749.4	47930.8	6836.29	1124.16	75114.2	300.251	206.943	195.66
												3.50615	86575.4	207282	16508.8	47282.8	6826.73	1510.25	70210.1	305.261	206.959	208.981
												3.51538	88765.1	213893	16922	46518.1	7187.96	1665.93	64565.8	302.557	214.572	228.734
												3.52462	93788.4	220061	19627.4	34499.7	7415.62	954.647	83491.6	225.07	213.313	202.635
												3.53385	95391.9	225380	19728.4	34022	7694.45	1371.16	72338.2	228.527	218.941	244.695
												3.54308	83500.5	206556	14642.3	62851.2	6958.44	2062.3	54502.4	397.207	215.652	212.184
												3.55231	72092.5	182695	11439.9	115799	5985.93	1102.27	47610.3	604.815	198.86	226.155
												3.56154	68650.8	173593	10680.6	123806	5547.31	1153.55	48720.6	643.831	189.015	212.828
												3.57077	58004.8	147469	8271.1	155952	4424.14	1535.37	49517.6	817.967	164.01	145.789
												3.58	73823.4	179648	12655.8	74519.9	5610.99	1259.7	74389.8	446.198	187.137	132.707
												3.58929	75235.9	181259	13264.2	70733.7	5631.15	1130.05	75160.7	416.585	185.225	165.625
												3.59857	76709.8	185781	13531.8	67769.5	5872.05	1179.35	75308.7	407.868	191.572	145.031
												3.60786	75608.6	183887	13161	71555.5	5811.31	1127.19	75590.3	426.629	191.295	132.745
												3.61714	75431.5	183342	13098.8	71128.1	5774.91	1243.72	74052.6	427.779	190.278	139.104
												3.62643	68261.6	166914	11171.2	95188.4	5057.93	1227.4	67901.8	535.795	174.972	157.48
												3.63571	72485.4	175732	12402.8	81460.5	5407.99	1133.33	70757.3	465.471	181.237	174.254
												3.645	75428.4	181335	13379.5	70052.3	5626.5	1070.5	76345.4	410.54	184.734	167.926
												3.65429	80443	190959	15142.3	53818.7	6029.58	977.569	86144.8	330.445	191.054	152.158
												3.66357	78099.4	187352	14164.6	64354.3	5896.4	1027.79	76969.3	380.738	189.856	173.807
												3.67286	71991.3	175374	12177.9	82257.9	5420.55	1171.3	71893.7	476.092	182.795	147.434
												3.68214	76638.2	184626	13663.8	69477.5	5790.43	1020.99	75099.3	405.051	188.414	172.234
												3.69143	80160.9	192292	14775.3	60253.5	6141.08	936.403	79560.6	359.185	195.04	160.723
												3.70071	73541	175566	13101.7	67402.3	5352.06	963.347	87889.8	400.628	178.6	127.338
												3.71	59603.2	149583	8793.57	143841	4449.33	1348.04	53470.3	750.534	163.002	164.297
												3.72667	81457.5	194034	15331.8	58373.8	6180.49	867.341	78526.5	342.166	193.858	199.903
												3.74333	83418	197116	16177	52459.2	6297.57	777.051	83658.7	310.104	194.651	198.915
												3.76	72441.7	175291	12451.7	81300.9	5382.78	1055.73	72370.6	461.415	180.42	172.923
												3.77091	57529	142941	8499.68	146502	4127.89	1313.93	55762.6	755.601	153.64	176.605
												3.78182	46132.5	117693	5963.12	218278	3258.67	2059.31	40514.6	1085.29	131.628	172.486
												3.79273	49944.8	128082	6581.68	191977	3671.81	2066.74	45570.4	1006.5	145.215	120.889
												3.80364	52087.3	133011	7006.25	173519	3840.23	2154.62	49182.8	939.63	150.088	110.513
												3.81455	60181.5	148815	9079	121494	4331.76	1663.26	62427.9	679.719	159.507	135.495
												3.82545	65752.5	162236	10393.4	102993	4896.98	1405.45	66521.9	586.652	173.098	129.933
												3.83636	67148.1	164924	10805.3	99333.2	4989.77	1338.45	65910.4	561.095	174.135	151.548
												3.84727	67432.9	165232	10927.4	99211.6	4992.74	1259.74	65932.8	554.246	173.631	162.754
												3.85818	67962.4	165688	11134.9	90890.7	4986.64	1363.37	70538.3	525.251	173.289	143.95
												3.86909	69801.6	170551	11550.1	87060.4	5215.42	1308.1	70936.3	506.592	178.923	137.87
												3.88	59060.8	147881	8668.09	137284	4355.45	1648.82	55494.3	745.137	161.029	145.164
												3.88882	60068.4	149568	8971.78	134477	4399.31	1542.12	54725.1	718.195	160.838	176.901
												3.89765	60730.4	151194	9120.86	128684	4468.57	1494.26	58360.6	699.177	163.201	148.784
												3.90647	65331.2	161291	10296.5	112819	4857	1306.22	59549	611.78	170.912	183.876
												3.91529	71248	172952	12066.7	84958.8	5291.06	1125.51	70765.6	482.125	178.957	169.047
												3.92412	80184.7	190345	15059.8	60419.8	5984.71	844.684	78777.2	349.111	189.136	215.465
												3.93294	84442.6	200309	16393.8	50999.4	6482.88	763.839	84808.1	305.045	199.313	175.328
												3.94176	88340.8	209030	17678.6	45393.2	6906.31	719.593	84608.1	274.482	206.496	186.883
												3.95059	87735.4	206382	17640.4	45723.6	6727.47	741.896	83292.4	273.908	201.494	221.766
												3.95941	89535.7	210545	18246.4	43011.1	6942.66	710.121	84579.3	260.027	205.445	213.173
												3.96824	80046.6	186079	15606.7	51652.7	5688.26	860.037	88782	307.048	179.423	225.332
												3.97706	87104.9	207388	17085.6	47510.2	6857.93	785.135	83574.6	289.8	207.254	166.439
												3.98588	84071.2	199681	16169.5	55013.1	6431.48	832.18	76376.8	321.151	197.679	234.833
												3.99471	82094.5	193948	15726.3	56563.2	6123.06	854.384	77628.6	328.179	190.564	248.716
												4.00353	88624.3	208904	17876.6	44608.2	6873.09	720.725	84248.9	268.98	204.809	205.243
												4.01235	87140.4	206354	17228.1	48521	6758.2	771.539	80224.8	289.226	203.505	215.702
												4.02118	79372.1	192098	14322.1	66648.4	6175.6	925.589	74502.1	388.562	197.228	165.316
												4.03	56480.9	141845	8109.75	153858	4126.83	1595.2	51837.1	806.885	154.93	161.454
												4.04	59819.5	150244	8804.94	136795	4475.63	1487.79	56644.5	739.391	164.651	132.596
												4.05	61803.4	153682	9390.57	128326	4570.74	1357.2	57159.9	684.519	165.075	169.417
												4.06	66307.3	164770	10431.9	113743	5049.63	1194.73	59446.4	614.133	176.548	165.942
												4.07	71100.1	174099	11877	93836.6	5391.34	1005.18	65668.2	513.174	182.065	183.374
												4.08	80290.6	193286	14732.6	63662.9	6206.98	858.896	76700.8	370.264	196.758	172.916
												4.09	73623.8	179592	12607.5	85787.1	5624.74	932.799	68163.5	473.591	186.617	183.39
												4.1	71204.6	176794	11637.4	99270.6	5595.95	1001.46	63132.3	543.186	189.188	153.274
												4.11	63212.7	159103	9510.54	133575	4865.36	1401.31	50872.5	704.956	173.129	185.421
												4.12	61519.9	154734	9123.63	133003	4665.66	1641.87	52769.4	722.245	168.907	158.1
												4.13	61162.9	154313	8991.31	133605	4661.49	1745.53	52802.7	734.142	169.509	144.18
												4.14	63535.6	159106	9591.42	118603	4821.15	1874.62	55143	670.982	172.553	150.151
												4.15091	64242.7	161972	9636.94	119066	4982.37	1911.96	53919	678.152	177.515	138.619
												4.16182	60003.1	151769	8637.01	133001	4545.26	2602.65	48789.8	760.809	166.835	151.844
												4.17273	59027.6	148653	8476.93	132703	4387.08	2873.14	48690.2	764.351	162.234	161.329
												4.18364	58834.5	146994	8516.09	126620	4271.18	3326.11	49012.3	742.406	158.201	180.023
												4.19455	56605.1	141653	8046.14	141867	4063.81	3331.26	44132.1	799.421	152.073	229.779
												4.20545	55591.4	137500	7992.05	143565	3845.39	3313.6	43099.6	789.604	144.315	314.202
												4.21636	54689.1	134410	7909.21	153766	3702.47	3138.96	38373.7	802.347	138.336	508.38
												4.22727	50309.7	122131	7211.92	179640	3206.43	2818.58	33854.1	861.871	122.272	904.497
												4.23818	52692.9	126605	7867.02	168661	3337.28	2047.26	37220.9	788.052	124.788	990.693
												4.24909	54335.5	129360	8366.07	157834	3406.9	1622.99	41705.4	731.3	126.101	958.188
												4.26	54617.2	125337	8896.78	125434	3115.85	1799.08	53520.9	614.103	116.139	999.783
												4.27286	50996.9	117023	8033.54	131655	2824.72	2282.98	54450.6	662.33	109.029	833.183
												4.28571	52337.8	120052	8364.63	127279	2930.55	1972.62	57097.3	637.769	111.961	778.905
												4.29857	60443.8	136647	10564	89896.7	3470.61	1704.95	67745.9	477.71	124.565	732.588
												4.31143	51487.4	115845	8394.08	107714	2724.34	2512.42	67312.3	579.075	105.625	655.083
												4.32429	58122	132991	9771.14	100391	3380.31	1825.64	65494.5	532.846	123.968	600.176
												4.33714	60808.2	145711	9630.44	115663	4037.28	2179.33	50958	619.354	145.058	464.463
												4.35	66399.7	162491	10619.1	111212	4837.77	1755.59	49082.1	595.599	166.92	371.034
												4.36341	71936	175431	12053.2	90515	5396.77	1475.1	56750.3	504.941	180.134	280.919
												4.37682	78449	189758	14014.5	69649.6	6039.36	1097.23	68406.9	403.903	193.574	208.147
												4.39023	84854.2	202456	16248	56364.3	6584.51	853.427	72169.5	326.731	201.194	253.709
												4.40364	88744.6	209936	17769.3	46426.9	6934.46	739.644	80258.5	277.23	206.442	221.663
												4.41705	85187.6	201313	16658.1	51512.8	6485.53	819.671	78317.6	303.408	197.658	241.181
												4.43045	80157.8	190013	15108.2	58677.7	5968.98	833.128	81892.2	342.514	188.853	196.396
												4.44386	75735.1	180310	13701.6	70164.5	5524.93	950.627	75333.9	397.978	180.118	225.047
												4.45727	76054	180019	13953.5	69026.2	5485.42	856.625	77009.9	386.035	178.096	246.04
												4.47068	87492.3	210179	16911.2	50936.9	7042.28	785.786	77933.2	305.886	212.414	173.192
												4.48409	84163.7	199675	16242.6	57415.6	6421.39	746.372	74284.4	325.25	196.789	273.676
												4.53773	75094.8	186122	12627	90659.7	6017.19	975.75	61064	497.911	197.452	181.281
												4.55134	82349.2	199470	15146.1	65124.1	6537.15	810.068	71085.9	371.473	203.963	197.038
												4.56463	88301	211135	17358.1	47778.9	7081.53	705.212	83218.4	288.598	212.428	159.056
												4.57792	78737.3	190737	14156	75359.4	6112.58	757.75	69016.5	411.843	195.054	221.465
												4.5912	68290.2	171767	10753.2	119598	5452.12	880.455	57923.3	622.032	187.508	152.877
												4.60449	69635.1	173563	11190.5	112927	5466.24	992.607	55194.8	588.951	185.449	211.272
												4.61778	72492.1	178683	12090.1	93571.6	5637.45	998.827	63605.4	512.886	188.539	176.941
												4.63107	72982.2	179928	12192.8	87658.5	5696.59	1092.18	66982.2	497.717	190.622	145.938
												4.64436	71757.2	177894	11799	96020.2	5637.92	1011	64392.9	530.386	190.025	149.025
												4.65765	71088	175186	11729.6	93533.4	5474.04	1106.22	65525.3	522.811	185.414	155.863
												4.67093	70557	173244	11656	93421.8	5361.35	1164.13	65068	522.29	182.108	169.321
												4.68422	70414.6	174456	11466.1	99791.8	5470.45	1091.11	62396.9	548.602	185.914	161.598
												4.69751	73289.2	181477	12236.6	104788	5797.01	818.131	55090	534.882	190.915	266.18
												4.7108	75688.4	186987	12888.1	90158	6048.15	829.197	62803.6	485.886	197.435	187.894
												4.72409	75597	183045	13315.7	81045.1	5747.69	800.987	69689.6	440.684	187.578	212.023
												4.73738	76659.6	185307	13681	74156.6	5860.89	744.464	77278.9	414.3	190.599	161.936
												4.75067	68179.3	169314	10935.4	114198	5260.63	920.999	59046.5	594.016	180.749	188.406
												4.76396	60093.6	152857	8771.23	161557	4677.99	1076.32	46736.2	794.374	169.01	193.964
												4.77724	55820.3	141603	7902.89	171264	4183.07	1286.88	48250.1	856.403	156.836	166.645
												4.79053	52313.2	134152	7077.46	189593	3930.27	1498.89	46195.8	957.148	151.755	132.954
												4.80382	50995.8	130453	6861.64	196325	3772.94	1485.2	45543	978.037	146.955	142.408
												4.81711	53274.6	136181	7283.48	182592	3991.93	1583.13	45979.2	929.021	152.929	145.838
												4.8304	52902.5	136455	7112.46	190332	4048.69	1645.64	43526.2	967.787	155.305	137.145
												4.84369	49392.5	127471	6448.06	210554	3688.75	1954.21	38795.7	1052.5	144.632	166.427
												4.85698	50684.3	129647	6764.61	193511	3728.06	1884.02	43598.7	987.817	145.674	151.473
												4.87026	44974.9	116963	5595.5	237518	3315.17	2239.03	36420.2	1183.89	134.784	143.149
												4.88355	45793.7	118949	5750.93	232235	3387.24	2104.58	37570.8	1157.63	136.914	140.097
												4.89684	47674.7	123759	6087.57	221601	3571.49	1976.03	38730.7	1109.39	142.25	139.593
												4.91013	51933	132226	7041.8	179627	3805.27	1826.16	48197	938.186	148.145	130.272
												4.92342	54461.5	134777	7876.86	139244	3778.23	1598.11	66829	769.005	146.203	100.845
												4.93671	51397	130879	6960.63	180060	3759.9	1565.5	52896.8	939.985	147.725	101.688
												4.94983	51142.8	131687	6809.97	200934	3850.55	1654.24	41773.9	1002.25	149.237	154.07
												4.96283	52610.7	134452	7143.45	185699	3916.33	1779.27	43639.3	945.958	150.485	163.338
												4.97583	49637.1	127758	6528.66	211097	3690.76	1878.79	37951.7	1040.41	143.948	191.266
												4.98883	55140.1	140016	7717.31	170006	4111.71	1576.51	47286.2	871.768	155.3	162.007
												5.00058	77273.5	185392	13992.5	68907.9	5815.65	831.042	78070.5	392.641	188.129	177.84
												5.01139	79840.9	188939	15083.9	59112.9	5914.01	781.33	83395.6	342.198	187.455	196.212
												5.02221	80819.3	191667	15328.9	57951.4	6059.84	746.945	84105.2	336.44	190.915	184.677
												5.03303	81131.8	192639	15377	56827.6	6112.22	785.435	84130.5	333.941	192.302	176.576
												5.04384	81689.1	194817	15467	56194.6	6256.1	722.972	87076.5	331.929	196.488	147.209
												5.05466	76035.6	181774	13743.1	73237.7	5625.23	780.28	76145.5	404.854	183.021	212.415
												5.06548	84270.8	200420	16352.8	49149	6533.45	697.133	92633.5	299.373	201.711	127.201
												5.07629	82932.5	194381	16327.5	50757.6	6138.1	678.826	89989.1	297.914	190.094	194.65
												5.08711	86297.2	202411	17317.2	46931.8	6523.38	689.544	86522.8	278.18	197.243	214.618
												5.09793	77114.5	187728	13591.8	78226.2	5999.11	821.772	69553.2	432.792	194.107	188.772
												5.10636	64467.6	161861	9895.79	135718	4990.76	1011.07	51758	684.336	175.248	206.74
												5.11411	67155.9	168048	10546.3	120044	5243.35	1015.66	56413.7	627.535	181.55	176.322
												5.12185	72609	179707	12058.1	99359.8	5711.46	907.137	60202.4	528.713	190.254	197.757
												5.12959	79639.3	192875	14418.5	71774.4	6218.69	752.833	71369.8	398.285	197.526	200.454
												5.13733	92611.1	219619	19071.9	41809.9	7490.37	552.996	86519.5	250.321	217.603	176.541
												5.14508	91717.2	218862	18558.9	43837.9	7486.96	585.176	85040.2	263.339	219.244	161.467
												5.15097	63331.3	159037	9633.76	133489	4868.24	1047.66	56305.1	690.774	173.496	156.299
												5.15548	62770.4	157416	9520.97	135222	4787.44	1103.35	55051.4	698.211	171.113	168.696
												5.15999	63046.3	158541	9501.49	134657	4839.84	1318.05	51550.6	705.055	172.401	184.591
												5.16449	62310.5	157679	9219.56	136284	4829.83	1531.64	50768.7	730.438	173.461	159.741
												5.169	63005.6	159002	9390.52	127085	4867.69	1637.34	54231.6	702.823	174.777	137.767
												5.17351	62036.2	156229	9207.68	131735	4733.99	1701.73	51826.5	718.451	170.648	161.691
												5.17802	62698.2	156263	9509.38	122571	4680.77	1645.27	55786.6	674.738	168.19	165.757
												5.18253	63712.4	160693	9538.05	123121	4934.33	1734.86	54143.1	689.17	176.335	138.958
												5.18704	64382	161338	9790.56	117305	4928.54	1669.07	56568.5	659.091	175.368	142.805
												5.19155	67572.3	167170	10789.1	103085	5129.88	1265.74	63822.8	576.054	178.405	145.934
												5.19962	82051.3	198713	15080.5	66594.4	6500.67	768.539	71013.8	375.47	203.121	202.078
												5.21368	79903	195969	14136.2	67914.6	6445.43	985.801	73035.1	403.736	205.918	129.471
												5.22774	80403.8	196212	14382.2	65899.8	6422.22	1002.31	72703.2	391.654	204.123	145.555
												5.2418	81543.6	196558	14985.8	64078.1	6350.73	965.721	69445.6	370.658	198.984	222.755
												5.25585	82557.9	198402	15396.8	55392.5	6447.74	993.643	79344.8	338.905	201.606	151.956
												5.26991	78550.6	191008	14002.9	77045.9	6145.17	787.896	67392.7	421.589	196.416	217.208
												5.28397	77497.5	186895	13880.8	71779.8	5899.38	927.56	71661.5	407.194	190.297	202.242
												5.29803	76380.5	183759	13661	76396.2	5742.16	824.166	70940.2	419.363	186.22	228.48
												5.31209	63763.5	157974	9874.91	115171	4733.36	1384.97	61797.5	635.254	169.207	147.135
												5.32614	66279.1	164503	10403	106691	5022.49	1451.59	61737.6	601.744	176.426	143.08
												5.3402	89284.6	209256	18244	45726.9	6839.77	666.626	80063.3	266.433	202.079	282.282
												5.35426	71577.1	178393	11635	102963	5684.06	1061.52	57747.9	556.242	190.962	182.934
												5.36832	63020.9	158787	9468.83	135673	4862.18	1308.19	51443.9	710.39	173.276	178.2
												5.38238	75956.9	184351	13294.7	80078.2	5805.89	981.118	65495.8	443.71	188.908	229.918
												5.39382	96174.1	226041	20317.5	42308.7	7686.32	656.573	67696.8	242.05	215.918	445.837
												5.4033	61100	141110	10395.2	102856	3722.12	1392.76	62471.9	525.836	132.942	638.844
												5.41278	59561	136491	10127.7	103563	3516.27	1531.79	62037.5	528.91	126.871	737.374
												5.42226	58015	131912	9861.28	101479	3319.97	1683.67	64689	525.744	121.404	731.822
												5.43174	58708.2	135201	9844.91	110924	3488.19	1489.09	59402	556.152	126.524	756.374
												5.44123	56972.1	134427	9094.96	137747	3560.71	1351.08	50068.4	654.651	130.2	749.292
												5.45071	57813.9	141098	8792.04	152011	3962.46	1491.33	43620.9	732.726	144.032	527.506
												5.46019	64469.2	156021	10400.3	119966	4516.58	1466.29	47867.4	606.01	156.881	528.79
												5.46967	60827	149312	9330.53	134727	4310.15	1668.26	46994.7	689.348	154.506	377.439
												5.47915	66105	160210	10756.7	105985	4701.33	1479.49	56038.5	568.037	163.188	321.909
												5.48863	73536.3	178798	12550.8	87546.7	5538.78	1272.5	58017.2	482.191	182.598	295.355
												5.49811	81570.6	197015	14969.6	67243.5	6387.62	856.222	68086.7	378.868	199.845	236.787
												5.50759	76487.4	181406	14101.3	63240.7	5587.81	789.888	88037.2	367.37	181.869	156.192
												5.51707	67771.2	163422	11356.5	90420.9	4846.77	1050.97	75225.9	504.612	168.191	161.555
												5.52656	53958	137213	7481.61	178827	4009.72	1515.5	46033.8	901.297	152.486	167.432
												5.53604	53333.8	136187	7349.2	189532	4000.59	1294.64	45046.3	927.819	152.346	166.856
												5.54552	56949.6	144710	8115.38	167892	4321.79	1229.93	48538.2	840.353	160.657	162.888
												5.555	59154.8	149762	8631.41	159436	4518	1103.19	49344.8	792.184	164.936	179.842
												5.56448	59413.9	149899	8762.15	158225	4513.95	945.962	51800.7	775.659	164.523	175.957
												5.57396	72526.6	177711	12288	93276.3	5576.13	774.657	68359.5	498.295	186.341	173.913
												5.58344	80523.4	195398	14583.1	71073	6343.35	809.764	68365.8	396.361	200.118	215.287
												5.59292	74582.9	182911	12743.4	81622.8	5815.66	962.029	71246	464.595	192.497	140.839
												5.6024	72422.2	178801	12061.3	92724.3	5660.27	945.035	66598.6	511.634	189.875	150.404
												5.61189	70498.6	171700	11839.8	97186.6	5252.35	954.457	63472.8	516.685	177.375	232.21
												5.62137	73075.3	179178	12314.3	90261	5621.24	1084.81	62239.2	497.383	186.863	207.438
												5.63085	75141.1	184339	12859.3	86193.5	5871.81	957.559	63880.5	474.293	192.473	198.075
												5.64033	74309.7	182839	12616.9	89515.6	5828.55	869.29	65569.3	487.733	192.415	175.906
												5.64981	77272.9	188880	13500.4	81918.2	6063.57	900.867	63161.1	448.032	195.403	227.704
												5.65929	86070.4	204310	16856.1	55066.9	6665.5	641.309	76533.9	310.558	201.724	256.828
												5.66877	88884	210810	17790.3	49568.6	7000.89	598.242	79666	284.88	208.077	231.651
												5.67825	92125.2	215791	19292.1	41145.9	7198.72	558.159	85856.1	242.627	208.873	236.098
												5.68774	65880.3	161997	10551.3	110547	4882.61	1015.03	64985.7	589.72	171.324	166.203
												5.69722	63859.8	159171	9858.81	132170	4828.48	1076.74	53307.4	672.403	170.473	217.023
												5.7067	63098.3	157663	9667.03	138178	4781.59	1020.39	52379.4	692.419	169.522	217.805
												5.71618	64449.7	162282	9841.63	133402	5025.42	1029.15	54067.2	685.428	177.225	169.339
												5.72566	65512.1	165292	10035.1	131866	5166.99	1069.01	51920.3	678.382	180.511	183.011
												5.73514	65930.8	166060	10161.9	130721	5192.19	1038.33	51850.5	669.109	180.673	193.358
												5.74462	85449	200957	16848.2	48393.9	6436.84	920.792	79185.8	291.588	195.715	247.112
												5.7541	85845.7	202756	16874.4	45082.2	6569.07	984.168	84461	283.46	200.005	176.983
												5.76358	85196.5	200154	16807.7	47280.2	6396.68	948.171	81221.2	288.408	194.963	229.982
												5.77307	85097.8	200022	16723.7	50597.6	6374.95	936.776	75297	299.411	193.917	294.133
												5.78255	86072.3	203243	16927.1	46423.5	6580.49	971.897	81058.7	287.093	199.746	204.979
												5.79203	82683.2	195598	15834.9	52794.4	6209.83	998.682	78990	318.611	192.912	215.728
												5.80151	74850.5	175565	13740.1	62267.8	5225.89	1279.08	78442	370.915	171.278	245.554
												5.81099	77319.1	183461	14156.5	63756.3	5638.41	1172.08	73731.5	374.938	181.706	241.889
												5.82047	73377.9	174649	12949.4	70964.3	5243.29	1490.65	70003.1	419.193	173.867	245.68
												5.82995	71285	169509	12423.8	76173.7	5012.84	1463.37	69520	441.695	168.617	256.473
												5.83943	67401.4	159625	11530.3	82551.4	4579.38	1411.92	73384.3	472.176	158.677	234.432
												5.84892	67893.6	162202	11465.6	84302.6	4724.54	1516.96	70229.2	486.278	163.322	218.661
												5.8584	67961	161928	11526.9	82607.4	4698.61	1565.77	70583.1	478.986	162.291	225.78
												5.86788	65208.9	153752	11042.5	84109.2	4314.49	1580.59	74431	485.089	152.044	234.527
												5.87736	71005.4	170483	12104	79399.6	5092.99	1748.43	64442.6	466.454	171.806	249.503
												5.88684	74044.7	177715	12906.9	72546.3	5414.77	1659.77	65381.5	431.623	178.751	246.514
												5.89632	70885.9	170353	12026.8	79895.3	5084.87	1935.96	61941.4	471.736	171.518	267.792
												5.9058	68407.8	164717	11320.2	86524.8	4837.95	2397.22	56883.4	509.776	165.783	308.868
												5.91528	69640.3	166272	11809.8	80189.7	4867.32	2200.08	60405.9	474.175	165.269	318.04
												5.92476	66809	163509	10703.8	109435	4879.61	1823.07	48770.5	589.996	167.874	374.454
												5.93425	67534.9	163998	11058.3	109377	4867.49	1483.43	49227	568.718	165.88	462.441
												5.94287	70771.2	172356	11780.6	95948.9	5246.89	1523.7	53245.3	523.574	175.863	346.576
												5.95123	81585.4	197932	14765.2	67953.2	6434.97	1129.7	61570.1	390.249	201.06	270.237
												5.9596	94513.9	222405	19741.5	39836.6	7525.27	766.198	74470.6	240.541	214.704	302.896
												5.96796	101049	237621	22099.5	30962.5	8382.57	711.575	79020.1	197.034	229.382	242.731
												5.97632	100867	236534	22165	29767.1	8314.32	728.157	81743.7	192.107	227.764	227.67
												5.98469	99022.2	233625	21268.9	33449.8	8182.89	707.141	79352.9	210.613	227.2	228.355
												5.99305	91609.8	216178	18677	41944.4	7219.81	872.946	75989.7	257.12	210.485	259.645
												6.00141	83556.9	203107	15287.3	61467	6714.94	1125.51	65960.6	366.042	207.877	207.498
												6.00978	84741.5	206488	15569.3	65823.6	6892.03	975.799	60104	373.584	210.623	277.58
												6.01814	85671.7	205966	16265.5	57092.4	6803.13	876.51	69867.5	332.62	207.022	236.622
												6.0272	109202	256372	25480.6	25960.3	9521.8	394.478	83968.3	160.368	246.686	229.696
												6.03869	113669	264710	27743	23021.9	9987.07	308.197	84683.6	139.795	250.484	272.555
												6.05019	115364	268855	28431.6	21507.5	10263.9	311.815	85053.7	132.904	254.692	255.723
												6.06168	113909	263415	28148.7	23061.2	9835.08	295.987	83135.3	137.287	245.614	342.524
												6.07317	122446	283132	32042.3	16832.2	11159.8	267.539	85226.7	106.114	263.639	280.407
												6.08467	120642	277602	31426	17941.2	10729.7	271.249	84243.6	110.733	256.065	334.754
												6.09616	119374	274292	30844.5	19381.7	10471	274.167	81309.2	116.763	251.762	399.617
												6.10766	114872	265282	28731.9	20595.9	9985.96	302.87	88769.2	127.369	247.9	272.196
												6.11915	110988	258621	26531.8	25191.4	9591.18	346.006	82519	151.713	244.817	293.977
												6.13065	112951	265440	26917.5	24914.6	10073.9	340.976	79903.1	150.968	254.475	267.572
												6.14214	89212.9	218250	16904.9	60508.1	7567.15	634.959	66191.9	338.886	225.122	213.152
												6.15019	75674.7	188945	12623.9	94099.4	6198.54	950.861	58023.6	511.324	202.369	182.666
												6.15815	73209.4	181724	12134	102046	5816.73	938.735	55645.2	535.964	192.256	234.62
												6.1661	75864.6	185847	13074	82435.8	5934.98	975.835	65468.9	460.028	193.79	188.381
												6.17406	95585.7	226383	19989.6	40320.2	7806.7	603.963	77883.6	240.014	221.71	245.333
												6.18201	82590.7	200583	15136.9	64867.3	6607.28	839.823	70566.2	372.866	205.986	188.219
												6.18997	88740.2	211940	17503.5	50432.5	7098.09	658.832	77886.5	294.05	211.639	207.971
												6.19792	88671.3	210825	17625	49186.7	7014.93	655.658	79421.1	287.341	209.072	215.122
												6.20588	90222.9	213273	18300.2	46558	7103	623.991	79529.5	270.965	209.041	244.693
												6.21401	61338.7	154979	9036.14	136260	4705.79	1526.41	53362.3	736.227	170.763	140.851
												6.22301	59405.1	151532	8473.74	147953	4602.02	1835.23	48418.5	801.602	169.128	140.894
												6.23201	69736.9	172330	11339.6	98599.3	5357.28	1156.97	63715.3	547.878	183.159	156.78
												6.241	68218.1	167414	11097.2	100549	5097.49	1184.63	63861.9	553.23	175.889	178.034
												6.25	61359.6	153289	9202	133078	4571.63	1531.66	52967.2	709.712	165.27	184.79
												6.26	65461.9	163401	10137.6	113834	5008.95	1366.28	60094.3	630.971	176.867	138.755
												6.27	72303.3	175915	12322.2	82335.9	5447.95	1012.24	74161.5	469.74	183.26	143.944
												6.28	85905.5	204598	16712.3	50990.7	6714.5	743.756	81904.1	303.424	204.391	181.372
												6.29	88200.3	209976	17472.2	46241.6	7000.58	703.399	85634.8	280.973	210.009	158.816
												6.3	83093	198474	15799.9	56620.9	6428.75	731.489	81686	330.616	199.634	174.728
												6.31	87151.1	207227	17157.5	49418.5	6839.76	696.996	82261.6	292.97	206.282	188.298
												6.32	93510.1	218333	19937.4	34959.7	7346.86	597.082	94540	218.287	211.493	174.845
												6.33	88888.4	208552	18121.4	43586.1	6829.95	690.585	85463.6	261.595	202.861	219.027
												6.34	85673.2	203451	16745	50691.4	6644.42	712.79	83546.7	300.344	202.453	183.572
												6.35	93418.6	220838	19475.4	38807.1	7549.44	554.798	90214.6	236.951	218.13	162.342
												6.36	94020.6	219765	20070.2	36845.8	7417.88	531.604	91182.8	222.88	212.621	201.369
												6.37	93097.2	217834	19709.3	39278.8	7314.4	513.947	89168	232.802	210.888	217.054
												6.38	95686	225027	20481.9	34495.2	7761.47	521.016	94430.7	214.372	220.607	155.205
												6.39	90132.6	211736	18582.9	45046.7	7014.57	505.588	86888.1	259.344	206.417	223.821
												6.4	94543.6	219767	20458.3	37325.1	7377.11	468.789	89988.1	219.16	210.108	247.418
												6.41	91268.3	214737	18881.5	43565.2	7174.85	530.178	85685.6	253.847	209.629	221.489
												6.42	69231.4	171086	11251.1	104908	5307.52	1000.88	61938.7	562.083	181.486	178.163
												6.43	71094.8	173577	11937.7	89986.4	5355.15	1013.39	69262.4	500.118	181.245	164.921
												6.44	77285	187241	13774.7	72072.4	5961.13	811.614	76722.1	410.121	193.251	153.536
												6.45	85125.8	201452	16728.2	50731.8	6537.18	640.484	87164.5	297.616	199.823	178.492
												6.46	84574.9	200079	16546.9	52021.5	6459.73	664.333	85286	303.553	198.084	191.467
												6.47	83356.5	199468	15822.5	55971.1	6488.88	753.751	81759.5	329.768	201.316	165.628
												6.48	78064.6	190054	13814.5	73810.1	6105.35	921.187	69833.9	419.49	196.517	179.464
												6.49	78415.5	190561	13963.1	73072.3	6120.94	880.6	70389.8	413.268	196.423	184.759
												6.5	76004.1	185225	13247.7	81936.5	5879.16	886.98	66557.5	450.316	191.453	206.471
												6.51	76092.1	186142	13196	82552.6	5948.12	870.584	67002.9	455.072	193.846	187.342
												6.52	77205.7	188145	13610.8	79183.4	6029.19	770.754	69861.9	434.496	194.942	185.814
												6.53	74513.8	181477	12889.6	84481.4	5706.37	858.304	68606.2	462.25	187.96	191.468
												6.54	72497.6	176525	12373.4	91332.2	5475.15	863.502	66318.6	489.17	182.558	212.159
												6.55	69737.9	171293	11487.5	99082.9	5283.85	999.011	65024.1	537.273	180.225	175.726
												6.56	63221.2	156364	9837.83	125938	4668.23	1067.14	58894.3	652.188	166.357	189.73
												6.57	57888.3	145486	8419.84	155163	4287.49	1374.72	49899.6	791.03	158.423	189.382
												6.58	64407.7	159887	10019.5	118320	4833.08	1196.75	60651	636.319	171.514	156.719
												6.59	74425.2	179490	13103.7	76941.4	5570.83	844.24	76678.9	431.795	184.04	166.974
												6.6	71028.8	173573	11935.6	88519.2	5371.22	930.88	73771.2	495.344	182.379	136.004
												6.61	75834.6	180681	13800.4	67293.2	5573.72	788.813	84870.5	385.695	182.276	159.834
												6.62	73296.2	177772	12703.4	79166.2	5531.93	833.809	79389.8	448.156	184.845	132.194
												6.63	77725.4	184166	14498.9	62157.2	5713.84	710.771	88253.5	357.003	184.148	163.842
												6.64	79266	187394	14982.9	57572.3	5850.98	755.748	88864.4	337.681	186.523	164.24
												6.65	79369.5	189321	14792.1	60761.5	5991.65	723.011	86661.5	353.275	191.222	149.661
												6.66	66351.5	164828	10474.3	118173	5055.94	1060.67	57704.6	619.591	176.075	189.529
												6.67	63911.2	160296	9750.21	129643	4907.18	1189.06	54741.6	680.343	174.059	169.83
												6.68	68955.5	172080	10980	107264	5402.7	1139.71	59966.3	586.342	185.562	152.424
												6.69	75886.3	182850	13474.8	73453	5710.21	935.309	73951.5	417.629	186.517	185.445
												6.7	78797.7	190214	14262.1	65480.3	6082.46	870.777	79099.8	383.515	195.271	146.872
												6.71	71831.1	174620	12225.5	87937.1	5381.12	940.487	70036.5	484.208	180.891	179.66
												6.72	81750.5	196989	15191.1	60460.9	6413.71	730.501	81907.6	353.178	201.625	143.897
												6.73	77374.5	186031	13996.8	70673.6	5862.93	753.347	78230.7	397.051	189.512	174.298
												6.74	78233.2	187023	14389.6	66164.9	5883.3	731.029	81604.7	375.287	188.971	173.568
												6.75	85734.1	200642	17392.1	41173.2	6489.51	612.762	104990	256.355	197.593	120.971
												6.76	83736	193275	17082.2	44533.7	6020.63	636.393	98051.5	264.975	184.748	205.477
												6.77795	83635.2	194022	16928.8	43824.2	6096.3	649.335	101251	266.045	187.701	163.947
												6.78758	83786.8	194759	16904.7	45723.5	6133.98	621.86	98030.6	272.586	188.615	178.416
												6.79721	85780.8	199528	17553.4	43705.3	6376.73	560.204	99025	260.141	193.358	174.59
												6.80685	87667.1	204821	17999.3	44483.8	6650.88	526.347	93732.7	260.28	199.068	194.261
												6.81648	79570.3	189969	14809	63635	6016.86	702.391	81996.6	361.436	191.364	178.004
												6.82573	65356.9	163415	10110	120806	5023.27	1228.17	56694.9	646.713	176.664	164.55
												6.83499	68930.4	168972	11314.8	104819	5162.43	1032.96	60024.3	553.814	176.2	231.531
												6.84423	84762.8	202009	16366.7	53517.5	6592.08	706.211	82289.7	313.969	202.236	180.122
												6.85349	90465.4	212593	18677.2	41779.5	7070.82	571.359	90149.3	250.149	207.989	186.986
												6.86274	100490	231601	22927.2	29815.2	7963.56	453.29	90517.7	180.296	217.381	277.819
												6.87199	95489.6	222851	20622.5	36145	7564.65	504.207	89195.6	216.458	214.438	226.208
												6.88124	93351	219435	19610.7	39178.8	7424.07	554.589	87864.2	235.458	214.045	200.82
												6.89049	88033.1	209242	17443.4	51518.2	6929.82	618.189	78300.4	294.938	207.208	232.572
												6.89593	57625.5	145310	8345.2	158580	4304.67	1224.89	51413.8	802.187	159.585	165.231
												6.90135	63184.1	157960	9659.48	130414	4794.12	1091.99	57345.1	679.702	171.149	161.112
												6.90678	74376.1	181512	12818.5	84503.4	5723.47	848.522	69888.5	464.86	188.991	173.271
												6.91221	82690.1	198429	15542.6	60344.1	6446.1	727.188	77903.7	346.549	200.658	185.499
												6.91764	79237.3	189984	14566.5	67025.6	6028.32	758.916	76756.1	377.675	192.034	196.371
												6.92307	83474.6	197692	16167.2	55069.8	6342.35	672.306	83021.6	316.955	195.86	204.544
												6.9285	74895.9	181454	13142.8	76903.9	5692.22	812.306	77555.4	433.345	187.738	147.746
												6.93783	65838	162143	10524.6	113482	4898.73	971.308	63591.7	597.557	171.69	173.964
												6.94718	68089.4	166723	11168.1	105790	5067.9	915.019	64185	556.277	174.423	198.937
												6.95653	83586.4	200818	15834.3	58948.9	6588.75	626.538	81698.6	337.551	204.078	162.267
												6.96588	95859.1	223717	20762.8	36957.1	7608.38	463.161	88134.4	217.38	215.003	242.385
												6.97522	102496	238920	23237.9	30994.9	8444.49	396.305	87197.9	184.357	228.135	255.421
												6.98457	118968	271894	31070.5	17466.3	10326.1	292.45	88125.9	109.384	248.666	329.802
												6.99392	115538	265736	29112.5	20727.7	9947.59	312.773	84408.9	126.418	245.452	347.604
												7.00327	116840	269519	29574.3	19484	10228.6	316.022	85968	121.51	250.557	297.719
												7.01262	121607	277236	32497.3	16886.4	10657	234.409	87614.3	103.023	251.917	368.999
												7.02197	116604	268440	29641.7	19812.7	10156	281.791	87692.8	121.494	248.959	303.829
												7.03131	111737	256675	27615.6	22525.4	9398.49	316.906	88462.4	136.38	237.716	319.352
												7.04066	110963	256425	26921.5	23084	9411.45	375.833	85926.1	142.514	239.787	295.132
												7.05001	106126	244969	24999.7	26701	8715.03	403.324	86164.9	161.306	229.114	311.977
												7.05936	101202	238241	22350.7	32085.4	8478.24	454.323	87209.9	195.696	231.928	199.235
												7.06871	82799.1	199150	15531.9	63913.6	6494.33	647.039	75292.6	356.095	201.682	205.221
												7.07805	95725	223672	20646.4	37181.6	7607.78	488.123	86920.6	219.654	215.255	243.364
												7.0874	100576	237637	21883	36362.5	8426.11	455.587	78603.5	212.749	231.172	264.919
												7.09675	108160	253944	25061.4	26912.3	9371.37	399.343	83772.4	165.228	244.446	233.562
												7.1061	102368	240404	22791.4	33323.9	8548.9	434.559	80609.7	196.517	231.447	276.561
												7.11545	107016	250865	24674.6	28059.2	9168.38	398.75	83298.5	170.179	240.779	250.454
												7.12479	99976.8	236365	21724.9	35352.5	8387.21	440.794	84047.7	210.291	231.411	211.711
												7.13414	106257	245800	25051.1	27023.3	8798.88	349.85	88942.4	161.498	231.288	280.775
												7.14349	105126	246104	24012.2	29187	8880.43	411.587	84525.5	176.527	236.085	247.974
												7.15284	106623	247344	24957.8	28266.7	8872.9	375.446	82723.2	167.024	232.687	330.273
												7.16219	112277	263094	26860	23544.8	9939.74	350.492	85344.7	146.248	252.212	225.655
												7.17153	107322	251545	24709.3	28819.1	9178.08	421.258	78643.3	172.915	240.314	299.324
												7.18088	104162	246226	23228.2	31140.5	8952.39	438.247	82633.3	189.172	240.248	215.25
												7.18976	78644.5	191961	13972.6	78412.4	6223.06	715.982	68657.7	426.329	199.021	194.523
												7.19793	103304	243490	23019.7	31760.1	8767.43	441.354	82596.8	191.505	236.37	231.259
												7.20609	105285	247925	23753.9	31039.1	9002.49	426.534	79194.8	185.286	239.27	269.886
												7.21425	96325.4	228018	20391.2	39541.6	7925.88	469.013	83799.4	232.125	224.129	210.749
												7.22242	103419	243519	23125.6	31724.4	8766.77	419.514	83381.2	190.194	236.092	232.687
												7.23058	117726	272246	29865.8	20301.2	10416.8	268.419	84492.2	122.953	253.774	314.926
												7.23874	118851	276649	29926.6	19662.4	10739.8	312.956	81434.2	122.484	260.31	288.01
												7.24691	114826	266284	28334.7	22291.1	10025.8	329.6	81219	135.383	249.138	330.908
												7.25507	114321	267486	27553.5	23878	10133.2	384.337	75474.1	145.499	253.192	335.513
												7.26323	95030.2	226101	19660.6	42391.7	7823.41	579.432	77210.7	249.71	223.233	233.454
												7.27917	68630.3	171352	10942.3	110713	5385.47	947.182	61906.1	591.73	185.364	144.122
												7.30039	82697.3	200139	15329.3	65759.2	6578.85	669.643	73555.6	367.446	204.711	191.507
												7.32162	83458	200616	15726.1	63122.1	6558.5	655.435	73986.5	351.497	202.6	218.829
												7.34285	92907.5	220832	19057.7	44237.5	7551.94	536.036	81517.5	258.411	218.719	207.526
												7.36407	103449	244210	23033.2	32392.9	8822.67	412.67	82485.9	193.253	237.683	230.026
												7.38529	90880.9	217934	18069.4	51394.6	7433.63	562.614	74522.3	291.455	218.226	230.545
												7.40652	107836	255050	24634.7	28715.3	9491.78	376.539	82413.1	173.948	248.593	216.874
												7.42775	114870	266955	28295.7	21255.9	10109.1	348.527	84135.9	132.699	251.47	272.674
												7.44897	108258	251099	25509	26075.6	9076.65	450.528	80126.7	159.226	235.525	337.994
												7.47019	92788.8	219863	19029.3	41640.7	7464.31	697.091	79983.6	252.515	216.32	215.381
												7.4818	65147.3	164741	9770.04	123468	5113.56	2097.2	46401.8	687.795	179.458	200.397
												7.49092	57452.4	141462	8562.78	155192	4011.25	1780.03	41146.5	763.104	146.29	487.542
												7.50003	51586.1	123331	7766.23	177517	3215.82	1380.46	40911.6	790.995	121.332	911.118
												7.50915	54497.6	120499	9466.15	105966	2836.5	1477.11	66228.9	517.617	105.774	1236.05
												7.51827	74353.6	163571	15223.7	58624.2	4412.89	861.094	76209.5	304.174	141.182	1209.52
												7.52739	57305.6	126334	10231.9	97980	3023.27	1402.31	65639.8	479.001	109.894	1426.66
												7.53651	115215	264332	28869.1	21360	9781.9	387.824	77089.4	130.085	241.491	467.234
												7.54743	60728.7	135981	10844.3	95566.8	3412.85	1362.54	62643.3	472.926	120.968	1237.06
												7.55836	44702.5	98756.3	7117.15	148239	2139.94	2130.43	52601	682.316	86.112	1882.31
												7.56929	44547.9	99391.8	6974.72	156320	2184.78	2129.34	49924.9	714.83	87.965	1764.11
												7.58022	45557.2	101023	7267.99	144121	2218.35	2042.51	55030.5	672.695	88.8991	1567.11
												7.59116	56144.3	124917	9760.75	106000	3000.53	1565.05	60999.6	516.924	110.098	1398.56
												7.60209	48762.8	108297	7986.74	134341	2447.62	1893.5	54175.6	627.167	95.0834	1740.84
												7.62396	47262.6	106438	7486.18	153083	2430.92	1844.67	49037.9	695.202	95.388	1685.07
												7.63489	43630.4	99653.3	6539.62	177226	2258.09	2092.56	45452.6	801.902	91.6334	1360.35
												7.64582	47315.4	106397	7504.61	148680	2423.45	1940.18	50660.3	686.477	95.3125	1561.52
												7.65675	49328.8	108341	8256.45	121820	2417.11	1975.28	58922.9	583.21	93.6814	1717.75
												7.66769	47192.9	106891	7391.05	155196	2459.8	1991.34	47695.7	711.788	96.6519	1576.94
												7.67862	50750.2	110280	8767.1	105360	2453.36	1821.02	69296.2	522.356	94.4315	1381.73
												7.68955	52704.2	118572	8749.61	131838	2820.28	1698.66	49641.1	607.85	105.483	1898.14
												7.70048	53285	117530	9182.53	115257	2725.65	1623.16	57597	543.12	101.79	1906.02
												7.71142	52861.6	117521	8974.11	125546	2750.75	1542.88	53115.4	575.203	102.723	2068.69
												7.72235	56051.4	125889	9586.69	113367	3063.89	1568.67	56751.8	545.13	112.336	1420.71
												7.73328	40627.5	90643.2	6157.66	175322	1930.5	1896.25	52792.3	784.628	80.9624	1384.43
												7.74421	54456.3	124333	8958.11	129933	3066.81	1597.02	51373.2	612.483	113.766	1304.42
												7.75515	52789.5	122178	8383.08	140624	3040.36	1651.18	51006	668.466	114.825	953.205
												7.76608	58484.1	133892	9903.75	111078	3420.97	1367.91	60230.2	547.659	124.054	843.168
												7.77701	58603.3	137172	9604.89	126266	3632.67	1234.72	54455.5	606.09	131.46	729.745
												7.78794	65237.1	153877	10968.9	96365.2	4294.33	1891	55357.3	520.926	149.025	554.329
												7.79659	77559.7	186591	13668	69204.2	5798.82	2287.22	52828	415.376	185.228	413.679
												7.80171	104792	244886	23834.2	26501.3	8786.39	601.293	83902.5	170.91	234.243	229.765
												7.80683	112747	264063	26787.3	22946.5	9928.15	516.829	76424.5	147.021	250.968	287.404
												7.81196	112501	264269	26627.5	22320.1	9994	515.601	80150.6	145.864	253.498	229.3
												7.81708	108995	254906	25316.1	26389	9336.42	532.884	74855.2	163.891	241.593	332.653
												7.8222	106000	249565	23876.8	28088.3	9076.56	618.033	76434.4	178.078	240.262	263.656
												7.82732	104119	245282	23175.6	29306.1	8837.62	626.457	78220.2	185.592	237.005	244.926
												7.83245	103148	243853	22664.9	31151.1	8772.32	628.549	76652.3	195.111	236.92	245.97
												7.83856	51401.1	127356	7252.73	170877	3497.1	1673.48	50860.4	866.035	136.179	206.743
												7.84886	38733.4	98529	4737.72	266622	2566.03	2082.23	37301.3	1262.16	110.077	180.543
												7.85915	44002.9	111645	5617.52	218917	3007.08	2206.96	44188.2	1110.39	124.724	140.702
												7.86945	40687.6	102634	5092.6	236856	2666.06	2334.29	42429.8	1176.5	113.611	159.413
												7.87974	41971.8	105366	5367.01	230795	2748.86	2089.57	42549.9	1126.89	115.38	189.063
												7.91062	41120.2	105141	5086.75	245399	2811.73	1963.18	42746.4	1209.48	119.342	121.243
												7.92092	34365.9	88388.2	3978.67	305820	2261.61	2153.44	34688.3	1428.29	101.017	140.648
												7.93121	33965.4	88452	3842.2	316347	2302.49	2384.56	32227	1493.64	103.022	124.332
												7.94151	28350.8	73273.1	3065.13	361974	1787.09	2645.29	28801.4	1649.74	84.3967	143.561
												7.9518	31236.7	81109.5	3439.06	331550	2042.99	2816.16	31429.5	1577.4	94.2845	119.349
												7.9621	30487	78650.7	3358.77	332903	1943.71	2898.83	31637.9	1577.48	90.4984	129.731
												7.97239	29369.5	75764.9	3195.48	338640	1850.32	2818.74	33440.5	1615.02	87.7169	104.977
												7.98268	27464.8	70396.6	2948.32	350332	1665.6	3066.57	32676.1	1660.89	80.7272	113.217
												7.99298	27830.7	70925.3	3002.57	326978	1658.19	3173.23	39900	1626.13	81.5611	75.9379
												8.00327	26838.5	68289.4	2888.3	346550	1583.11	2861.35	36272.6	1650.58	77.9262	97.8808
												8.01357	22742.7	58175	2321.23	396434	1303.72	2764.7	32927.3	1831.18	67.2651	83.2027
												8.03416	24654	62779.1	2599.29	374681	1428.88	2434.36	35426.3	1726	71.981	90.3647
												8.05451	34389.2	88653.4	3993.83	320008	2288.99	2052.42	29830	1434.01	100.653	204.235
												8.06451	37007.4	96089.9	4335.43	298091	2559.86	2266.83	31046.5	1391	110.418	171.848
												8.07451	38091.1	99469	4482.72	299089	2706.29	2139.35	29507.5	1380.08	114.899	183.953
												8.08451	41422.7	108558	5002.03	282975	3056.98	1971.3	29040	1302.87	125.452	205.705
												8.09451	43973.1	115301	5407.95	264913	3309.27	2000.96	29898.6	1241.79	133.182	204.685
												8.10451	42597.4	111594	5203.87	277674	3171.98	1897.43	28697.2	1271.29	128.539	225.649
												8.11451	42637.6	112019	5177.7	275986	3195.96	2007.01	28974.3	1281.85	129.815	203.686
												8.12451	41111	108364	4899.13	287498	3070.74	2240.85	27236.2	1336.13	126.09	207.016
												8.13451	40995.2	108301	4868.94	291508	3080.22	2258.67	26260.5	1347.42	126.239	216.114
												8.14452	41719.6	110020	4999.26	284521	3136.91	2115.09	27759.2	1320.15	128.18	201.249
												8.15451	41185	108000	4963.97	289646	3042.23	2112.09	26204	1313.71	124.082	263.223
												8.16451	42548.1	111033	5207.88	272990	3127.45	2136.8	28368.9	1262.74	126.885	247.942
												8.17451	41140.4	107683	4959.91	285888	3018.28	2198.7	26887.5	1309.71	123.532	253.291
												8.18452	42935.9	112345	5237.56	266937	3182.07	2207.95	29864.3	1262.44	129.446	203.592
												8.19452	44370.4	116770	5433.74	262880	3378.25	2170.08	29227	1247.35	135.531	199.682
												8.20452	41744.7	109708	5019.79	281428	3107.11	2263.18	27404.4	1309.64	126.884	222.697
												8.21452	42452.1	111607	5145.28	279503	3185.09	2044.51	27885.2	1289.78	129.18	220.671
												8.22452	42365.2	111071	5158.9	281416	3156.13	2018.59	27072.5	1282.08	127.636	254.99
												8.23452	43017.8	113040	5244.6	277001	3238.63	2024.41	27554.7	1273.99	130.503	235.796
												8.24452	45047.5	118613	5540.16	258939	3451.11	2191.69	29153	1233.12	137.657	202.753
												8.25452	49033	128781	6251.39	233090	3841.75	1843.76	32814.7	1125.75	149.238	180.452
												8.26452	46641	120872	5946.24	241074	3463.37	2089.05	30796.6	1140.42	136.402	265.429
												8.27452	49050.6	127845	6345.08	232868	3772.71	1663.84	33050.9	1099.39	146.091	215.513
												8.28452	51045.9	133231	6682.64	218844	3993	1589.16	35799.8	1056.57	153.161	177.389
												8.29452	49202.9	127678	6423.15	231963	3747.46	1592.18	32955.8	1081.97	144.632	243.58
												8.30452	48209.2	126247	6168.46	244397	3739.42	1618.22	31155.5	1134.57	145.07	224.521
												8.31452	50583.8	132215	6576.31	220908	3956.13	1688.61	35242.9	1072.18	152.324	174.955
												8.32452	53407.1	139695	7079.08	206665	4266.11	1659.63	35699.3	1015.01	160.798	178.249
												8.33452	49330.1	128342	6414.5	231095	3784.34	1638.41	33086.1	1087.52	146.122	226.36
												8.34452	49339.9	128273	6434.5	233197	3782.2	1561.9	32679.9	1085	145.7	240.973
												8.35452	51338.5	134460	6698.8	221319	4061.43	1680.3	33589.5	1065.26	154.826	195.303
												8.36452	47823.7	124993	6094.9	240750	3670.78	1824.68	31585.7	1138.34	143.34	217.513
												8.37452	49423.8	129398	6357.51	231810	3853.52	1789.35	32318.2	1107.47	148.824	205.969
												8.38452	48542.4	128028	6108.96	236808	3826.52	2162.16	30666.3	1155.49	148.93	188.82
												8.39452	50009.9	130923	6445.62	227173	3908.8	1985.54	31427.1	1097.11	150.174	221.365
												8.40452	48954.6	127308	6324.52	230334	3731.71	1985.25	31336.2	1098.98	144.359	252.506
												8.41452	49750.8	129693	6456.73	230415	3844.04	1861.31	30789.7	1089.58	147.394	260.3
												8.42452	45145	118221	5647.56	267365	3429.4	1784.65	27464.3	1208.41	135.159	284.326
												8.44452	50026.3	129805	6542.13	220852	3820.22	1785.34	34389.3	1063.25	147.356	215.407
												8.45452	49181.5	127777	6371.44	224969	3743.73	1881.88	33940.2	1086.52	145.422	209.821
												8.46452	49426.6	128025	6449.7	224284	3740.73	1856.87	33284.3	1072.7	144.626	239.797
												8.47452	53420.7	137720	7228.53	195693	4102.46	1650.65	38766.7	966.013	155.192	195.699
												8.48452	48992.7	126516	6405.22	225863	3668.15	1819.87	33366.6	1072.21	142.205	253.325
												8.49452	50117.4	129629	6598.43	220540	3800.41	1707.41	34416.5	1051.18	146.265	233.918
												8.50541	48001.3	124277	6212.77	233688	3596.4	1749.7	33286.8	1101.37	140.505	236.114
												8.5177	51195.4	133065	6742.23	215874	3961.31	1696.1	35037.6	1042.5	151.528	204.897
												8.52998	53143.3	136051	7248.4	192590	3997.17	1671.29	39579.6	949.551	151.593	213.832
												8.54227	50805.8	131176	6727.79	212123	3847.61	1765.53	35985.7	1028.87	147.884	216.654
												8.55456	50673.8	129995	6742.54	202869	3759.49	1946.38	38266.4	1007.89	145.481	204.789
												8.56684	48981.9	125085	6505.46	218337	3557.2	1820.42	34895.3	1035.55	138.131	287.243
												8.57913	50073.2	126696	6814.31	206307	3579.67	1554.45	39051.8	977.414	138.421	274.259
												8.59142	50083.9	125374	6916.22	196303	3476.7	1578.49	42078.8	940.171	134.984	280.722
												8.6037	52184.4	131108	7292.79	191279	3716.03	1497.53	40862.8	912.378	141.473	299.447
												8.61599	59899.8	146997	9193.39	138167	4232.04	1227.8	53367.1	694.38	153.508	279.608
												8.62827	66481.1	164179	10608.6	114013	4996.14	1038.98	60193.2	600.411	173.969	191.075
												8.64056	72901.1	175234	12763.4	81948.5	5353.31	846.183	73698.5	448.611	178.234	202.708
												8.65285	57504	142364	8576.42	155251	4094.87	1147.95	50989.2	760.042	150.966	258.786
												8.66513	61271	149550	9629.38	129663	4322.71	959.605	60523.9	650.346	155.766	235.417
												8.67742	76751.4	182239	14166.9	67193.5	5629.93	683.831	84689.2	376.066	182.474	181.896
												8.6897	56358.7	140178	8284.21	164096	4032.82	1125.74	49555.6	794.173	149.801	250.194
												8.70199	73899	177143	13101.2	77974.1	5429.03	812.892	76112.3	429.888	179.537	197.179
												8.71428	73253.7	176187	12901.7	79792.5	5417.19	725.113	79783.7	438.043	180.367	163.193
												8.72656	72626.3	172745	12954.3	77941.6	5197.09	769.722	79537.3	426.019	173.258	205.332
												8.73885	77774.8	184873	14393.6	68290	5744.25	700.9	79078	377.207	184.427	220.556
												8.75113	61349.8	149799	9637.73	134619	4332.14	979.426	55526.2	660.552	155.146	301.378
												8.76264	72359.7	172542	12789.4	79452.6	5190.86	867.432	75866.7	436.627	173.332	217.651
												8.77291	47642.9	119422	6488.8	225634	3276.24	1425.94	35050.5	1005.22	127.552	440.976
												8.78319	44543	111572	5926.66	247869	2989.7	1622.85	30569.9	1075.02	118.33	582.225
												8.79346	49585.2	122798	6964.23	207522	3343.67	1525.41	35513.5	931.619	128.054	578.465
												8.80374	49045.3	122244	6815.53	218403	3358.09	1411.61	34000	962.5	128.683	568.791
												8.81401	49007.1	121133	6888.69	213868	3279.27	1453.05	34195	939.309	125.594	670.368
												8.82428	47645.3	118436	6568.71	225460	3204.82	1553.54	32114.4	985.676	123.765	668.273
												8.83456	42163.2	106331	5471.07	275417	2840.16	1646.91	26156.1	1151.59	113.312	706.759
												8.84483	43191.6	109200	5617.34	266822	2947.41	1716.81	26912.3	1137.6	117.003	633.883
												8.85511	45254.5	114412	5964.96	248923	3128.65	1766.99	28826.2	1091.69	122.852	557.681
												8.86538	44188.1	111360	5799.29	253930	3004.27	1857.97	28036.9	1106.41	118.8	619.055
												8.87566	46069.9	117007	6070.62	246771	3243.87	1760.85	28643.3	1088.57	126.528	525.22
												8.88593	40316.3	101193	5164.26	280889	2635.92	1990.26	25168.8	1183.77	106.9	785.242
												8.8962	45991.5	114299	6238.38	228187	3047.09	1716.26	33437.5	1017.55	120.007	558.475
												8.90648	49163.1	122705	6792.31	212360	3371.43	1633.67	34605.2	963.809	129.675	508.453
												8.91675	45532.8	114262	6068.33	239890	3087.4	1834.94	30105.6	1061.88	121.333	584.957
												8.92703	43874.4	111822	5654.84	264024	3070.1	1879.55	26539.4	1150.46	121.414	550.637
												8.9373	38577.1	98296.9	4806.82	313720	2608.41	1722.47	21940.4	1267.98	106.033	776.8
												8.94758	45205.4	117924	5806.38	299141	3452.25	1383.35	18927.4	1183.18	130.256	911.506
												8.96812	46807.1	122527	6100.22	302294	3670.04	1240.22	16784	1153.09	134.754	1258.3
												8.9784	43706.9	112987	5586.07	293812	3205.92	1519.19	21188.5	1192.66	123.961	768.338
												8.98867	48935.9	126007	6436.05	228409	3639.51	1733.05	32529.4	1065.32	140.612	293.295
												8.99895	56245.9	143417	7921.57	181457	4283.85	1448.52	39467.1	880.836	158.015	260.487
												9.00922	54526.4	139845	7509.48	188805	4165.82	1504.2	40301.5	926.86	156.299	205.963
												9.0195	56114.9	143700	7817.03	175454	4309.81	1567.57	42971.1	886.678	160.641	180.803
												9.02977	53682.4	137348	7370.04	191683	4050.2	1566.37	39669	937.349	152.783	221.408
												9.04004	57616.5	146564	8208.2	167452	4395.87	1457.98	43825.8	840.291	161.775	207.484
												9.05032	53739	139222	7233.42	199146	4190.15	1733.05	36211.5	979.154	157.51	211.929
												9.06079	46498	122755	5753.38	249557	3622.25	2229.4	29785.7	1207.41	143.126	187.502
												9.08343	51620.5	132653	6905.82	200047	3875.17	1870.86	38308.3	993.491	148.78	202.747
												9.09475	51056.1	132283	6738.76	213364	3909.83	1783.58	35223.1	1035.69	149.836	213.597
												9.10607	53974.4	139582	7302.81	194908	4196.73	1605.49	38868.4	964.001	158.144	184.463
												9.11739	54868.8	141010	7540.62	187020	4220.64	1597.89	39773.1	926.94	158.008	202.768
												9.1287	61131.3	156054	8901.64	156259	4824.96	1266.97	45155.8	787.696	173.149	192.792
												9.14002	56918	145437	8027.16	177133	4378.16	1417.68	41117.1	870.97	161.241	224.714
												9.15134	60795.3	153577	8962.88	149311	4654.59	1322.59	47763.6	760.672	167.834	203.091
												9.16266	56021.5	142997	7835.11	172409	4262.65	1558.33	44569.5	875.976	159.325	174.761
												9.17398	64982.2	161867	10120.2	127110	4941.61	1064.39	54387.7	652.363	173.241	210.438
												9.1853	67570.7	169397	10594.7	119842	5309.81	1080.7	54470.2	628.716	183.123	185.655
												9.19662	57048.6	147415	7925.41	182891	4527.1	1371.02	40290.5	900.957	166.632	187.24
												9.20794	59408.4	152116	8511.46	165587	4674.66	1274.32	44147.5	826.75	169.738	187.15
												9.21926	57369.3	147420	8064.67	180226	4498.34	1310.02	40674.6	879.463	164.954	210.094
												9.23058	72217.7	179148	11910.3	101215	5697.72	935.121	59315	538.95	190.336	194.684
												9.2419	71116.4	178419	11413.1	108595	5728.83	1023.16	56003.1	579.861	192.986	175.237
												9.25322	76615.7	189466	13099.1	85029.3	6175.19	863.501	65436.8	470.552	200.925	159.979
												9.26454	68799.5	170250	11118.9	109138	5275.1	1013.75	59004.7	576.618	180.479	199.379
												9.27586	59562.4	151744	8593.05	156123	4625.25	1317.87	48440	800.922	168.855	158.529
												9.28718	54321.1	139226	7480.28	187950	4137.68	1454.03	41844.4	925.751	155.861	188.409
												9.2985	74868.5	182200	13006.9	89427.6	5731.05	784.032	63411.9	469.891	187.26	256.966
												9.30982	69319.2	170666	11321.6	107672	5258.87	1053.12	56697.6	564.14	178.62	249.988
												9.32114	59345.7	148513	8803.88	153999	4395.54	1246.53	47441.2	762.986	159.586	253.956
												9.33246	59185.4	148648	8697.04	152302	4413.81	1386.92	47843.3	772.069	160.97	221.584
												9.34378	62729.7	158597	9361.14	143247	4874.38	1308.4	47219	733.057	173.142	212.306
												9.3551	62443.7	158768	9224.69	149816	4916.43	1303.68	44620.6	757.305	174.493	220.685
												9.36642	54206	138743	7453.83	186084	4104.66	1622.8	40970.3	925.528	154.736	200.375
												9.37774	55192.5	139231	7837.15	178945	4056	1454.58	41398.5	866.837	151.039	282.391
												9.3902	40247.4	101952	5068.98	277511	2689.08	1903.3	28794.3	1213.85	110.649	441.849
												9.40449	38324.8	95562.4	4875.02	288430	2422.37	1846.15	27073.4	1207.03	100.532	699.955
												9.41877	44865.2	111208	6086.66	240619	2937.01	1494.66	32230	1033.23	116.027	655.263
												9.43306	40239.6	99596.4	5266.91	271100	2533.02	1654.94	29226.2	1134.14	103.58	741.069
												9.44734	51063.6	126423	7263.37	197427	3478.55	1370.87	38777.7	897.03	132.357	481.951
												9.46163	47566.5	117727	6623.05	223958	3167.62	1253.61	35609	967.897	122.912	577.471
												9.47667	50580.7	124278	7251.99	194603	3365.3	1343.32	40390.4	882.128	128.713	505.352
												9.4919	55510.1	135044	8382.74	161778	3724.29	1218.47	46594.5	758.605	137.964	473.329
												9.50714	55886.9	136166	8440.64	159929	3773.5	1224.63	47057.2	755.072	139.551	447.118
												9.5681	43132.8	102932	6045.16	207090	2500.93	1759.02	43428.2	940.131	102.455	602.981
												9.58333	25460.4	61064.1	2989.11	361851	1277.21	2428.93	26187.5	1442.23	61.097	873.147
												9.59602	30080.7	72533.2	3673.67	314805	1600.93	2398.55	30183	1320.24	73.3048	707.548
												9.60461	59985.2	141147	9904.19	135012	3814.8	970.955	49630.1	612.747	135.447	937.347
												9.61321	68306.3	160862	11974.1	108739	4605.98	780.519	53496.6	506.88	154.289	856.388
												9.62181	72109.8	168675	13123.6	93898.4	4900.37	731.174	57285.5	447.984	160.07	841.658
												9.6304	82071	191643	16038.9	68362.4	5920.61	614.513	63660.8	345.252	181.403	679.47
												9.639	67460.8	159735	11625.1	107853	4582.77	890.145	55353.3	520.028	155.305	654.816
												9.6476	63881.6	151113	10737.7	115726	4225.82	985.531	55908.9	558.868	147.229	608.966
												9.65619	39481.2	94652.7	5318.56	236368	2248.89	2041.64	37301.2	1045.49	94.5038	715.321
												9.66479	40293.4	96999.1	5425.59	225474	2333.29	1937.61	42421.9	1031.16	98.3862	471.619
												9.67339	38245.8	92304.4	5015.34	231964	2185.64	2192.86	43958.2	1086.44	94.6249	362.696
												9.68198	29663.9	72835.8	3529.81	331927	1656.26	2016.85	30760.4	1391.41	76.3106	447.555
												9.69058	44706	108879	6206.64	225685	2784.43	1459.43	36626.4	978.033	110.944	680.778
												9.69637	52592.3	126701	7886.72	170832	3369.14	1277.28	45638	784.48	127.298	583.297
												9.70211	60207.5	143615	9695.66	125014	3963.86	1172.91	57044	619.319	142.849	434.892
												9.70784	51698.5	122787	7801.71	147034	3155.91	1720.05	55827.3	737.459	122.082	399.806
												9.71358	55147.2	131221	8547.1	135217	3474.57	1481.49	58241.4	682.345	130.816	374.754
												9.71932	51521.3	122131	7782.17	145684	3124.29	1771.14	56303.2	734.069	121.099	401.94
												9.72506	48823.7	115085	7274.09	154580	2857.27	1880.48	55369.7	768.571	113.131	445.121
												9.7308	47280.6	110080	7084.8	149664	2647.33	1942.6	60460.6	752.968	106.623	430.081
												9.73654	51098.5	120324	7782.9	144512	3038.32	1685.81	57933.2	722.15	118.119	429.638
												9.74228	44806.5	104697	6522.49	165893	2479.01	2201.58	54687.6	820.57	101.685	487.314
												9.74802	57560.5	135441	9252.45	120785	3586.43	1436.7	60848	615.188	132.327	438.374
												9.75376	43759.3	104817	6120.97	200176	2572.48	1783.66	46232.7	932.482	105.455	470.534
												9.7595	30502.5	74036.7	3706.19	312964	1659.07	2273.52	31680.6	1329.63	75.951	551.326
												9.76524	55003.8	130896	8542.68	144920	3468.17	1304.88	53503.9	697.797	129.701	498.265
												9.77098	36244.2	86709.2	4755.34	253834	1996.52	1991.11	38814.8	1114.37	86.9184	593.395
												9.77672	50887.7	120166	7728.34	150868	3048.28	1479.23	57282.9	736.662	118.49	431.311
												9.78245	35918.9	85219.3	4748.08	243710	1926.71	1946.85	43700.5	1088.31	84.8697	507.752
												9.78819	34317.1	82822.2	4378.89	281884	1907.57	2001.75	33628.4	1198.3	83.8059	665.562
												9.79393	42780.6	103755	5827.9	221817	2580.91	1975.1	38009	1005.73	105.499	590.437
												9.79967	44119.5	105725	6149.14	188849	2594.84	2166.58	48351.8	920.567	106.785	393.85
												9.80541	54003.8	127796	8337.2	138020	3319.32	1780.9	53801.3	693.748	125.555	499.515
												9.81115	55665.8	133411	8527.85	133554	3577.84	1769.51	55914.4	692.365	134.372	346.789
												9.81689	53860.3	128737	8147.62	134732	3388.2	2040.86	56759.2	710.421	129.428	327.764
												9.82263	78704.4	184855	14805.9	63895	5638.91	1013.55	69839.6	358.956	178.687	376.938
												9.83219	113810	261973	28209	19595.6	9717.03	463.506	84718.5	127.4	242.785	297.39
												9.84182	116084	267871	28986.7	19940.5	10070.9	423.476	79295.9	126.386	247.898	355.816
												9.85145	111273	257166	26968.3	21023.8	9458.87	490.668	86174.7	137.014	240.701	261.458
												9.86108	65261.3	150589	11491.6	82585.5	4095.16	1321.37	74107.1	452.259	142.918	401.23
												9.87071	64849.4	148944	11473.6	81568.7	4011.48	1335.04	75133.2	446.721	140.326	421.81
												9.88711	105546	242498	24869.6	25419.9	8525.98	513.85	84804	158.391	224.743	334.635
												9.90837	81021.7	187034	16025.1	50626.1	5674.79	936.477	82922.3	297.99	177.014	318.159
												9.92315	53243.7	124411	8341.34	131181	3151.88	1744.13	59020.6	664.883	120.267	495.562
												9.93781	40046.9	95507.4	5460.47	224247	2258.47	1937.1	41642	1009.07	95.0931	608.459
												9.95248	55583.8	134133	8379.49	136947	3624.45	2189.8	50487.3	718.201	135.892	380.485
												9.96323	50016.4	123458	7033.3	187593	3338.56	1754.52	42247.3	900.645	129.533	369.771
												9.9739	59258.8	143164	9280.53	123362	4006.98	1223.63	64399	643.901	147.288	221.935
												9.98458	56489.4	136844	8632.95	139501	3772.09	1227.12	59596.8	703.836	141.076	254.033
												9.99526	55605	134915	8437.47	143854	3709.58	1134.28	61116.4	720.047	139.864	229.107
												10.0059	48532.8	119925	6775.58	195172	3224.82	1323.86	47819.5	922.666	127.389	260.886
												10.0166	35001.4	88916.8	4213.94	323726	2265.99	1809.92	25952.2	1354.55	97.107	442.925
												10.0273	33909.3	85885.7	4038.03	324999	2149.78	2130.5	25738.3	1381.2	93.4164	445.329
												10.038	31313.3	80876.4	3542.62	360825	2049.47	2294.82	22499.2	1528.4	90.8328	350.107
												10.0486	33285.9	85988.8	3832.09	340833	2215.68	2135.71	24967.7	1471.44	96.9643	296.821
												10.0593	41994.5	106581	5314.34	250807	2843.85	1969.58	35599.7	1172.77	117.586	247.833
												10.07	45168.3	113868	5949.91	233069	3086.07	1658.84	36756.4	1073.76	123.773	304.223
												10.08	44728.1	112567	5857.73	223835	3022.14	1803.43	41061.8	1071.87	123.037	223.466
												10.09	46902.9	117846	6269.05	209145	3207.87	1694.91	43528.6	1013.9	128.583	212.17
												10.1	45078	113745	5906.27	224038	3078.02	1687.55	41696.6	1070.66	125.004	206.974
												10.11	42851.1	109263	5430.93	248814	2960.25	1858.15	36020.5	1166.21	121.55	225.031
												10.12	40938	104077	5112.1	259517	2759.45	2259.05	32678.6	1210.47	114.677	283.095
												10.13	46044.8	115737	6104.64	215956	3131.47	1807.04	41127.6	1038.54	126.007	237.758
												10.14	51138.1	126856	7210.5	177944	3489.79	1506.15	49295.8	878.985	135.656	225.385
												10.15	57270.7	140597	8642.09	141668	3986.23	1097.19	61521.9	720.668	148.811	179.612
												10.16	55950.1	137599	8331.42	146566	3874.98	1139.46	61380.5	746.495	146.301	168.487
												10.17	55921	136871	8398.67	146870	3826.92	1083.1	61040.9	736.893	144.162	193.016
												10.18	51610.1	127802	7330.72	172056	3520.06	1402.71	52983	857.745	136.85	195.198
												10.19	52615	132031	7394.18	184243	3746.98	1382.23	45170.2	892.316	143.103	237.137
												10.2	58683.7	146553	8695.06	144341	4306.8	1174.63	57725.2	746.233	159.225	149.312
												10.21	62176	152154	9785.8	120130	4443.74	1000.5	66438.7	628.92	160.232	167.057
												10.22	67815.1	163656	11407.2	97584	4869.57	814.147	73065.6	516.584	168.224	188.62
												10.23	73109.9	173933	13158.3	77059.6	5271.44	611.478	85533.8	416.223	175.329	174.206
												10.24	73384.2	175785	13042.6	79504.7	5379.96	672.929	80487.6	430.819	178.666	177.518
												10.25	72004.3	174004	12462.8	85880	5339.59	744.37	76386.1	465.388	179.308	167.206
												10.26	66074.1	161515	10719.6	108123	4835.55	931.399	67325.6	572.146	169.317	174.304
												10.27	66227.4	161415	10787.2	108278	4808.87	994.209	64208.4	569.475	167.695	211.366
												10.28	64639.5	158865	10276	115068	4746.23	1002.34	64542.7	607.09	167.936	170.345
												10.29	58977.5	145124	8954.86	137266	4171.52	1215.83	57966.6	704.848	153.375	203.492
												10.3	54024.3	136441	7599.77	182044	3952.43	1365.05	44198.1	885.773	149.207	226.005
												10.31	62404.9	157125	9371.68	139170	4793.86	1170.14	52629.5	717.672	171.583	173.069
												10.32	61192.1	153863	9128.92	146645	4645.53	1213.61	49243.9	740.914	166.974	211.778
												10.33	62037.7	156274	9293.61	145562	4761.38	1154.11	49103	732.968	169.993	210.307
												10.34	67427.2	166691	10816.2	118139	5110.02	1003.44	54497.2	603.258	175.543	257.442
												10.35	76812.1	188105	13375.6	82346.3	6050.59	818.417	66834.6	450.945	196.127	188.44
												10.36	85402.1	206583	16123.2	62346.4	6895.36	635.014	71727	347.422	210.346	212.578
												10.37	87690.3	210651	17004.5	59857.8	7051.12	569.89	69579.2	326.065	210.916	280.821
												10.38	89871.4	215207	17825.2	53126.7	7286.88	525.808	75730	297.116	215.269	232.041
												10.39	94983.2	227588	19527.3	44912.6	7980.72	445.403	80484.8	257.678	228.273	191.683
												10.4	95394.7	226983	19859.9	46095.3	7876.61	425.242	76031.9	255.756	223.68	273.442
												10.41	95983.9	227214	20251.8	45499.4	7853.61	391.624	76158.6	248.639	221.689	311.42
												10.42	99927.5	236245	21685.4	38668.5	8357.82	390.204	79021.8	219.483	230.153	273.624
												10.43	96996.1	229116	20686.6	42308.7	7951.83	400.454	78771.9	236.199	223.113	286.63
												10.44	95205	227926	19577.3	48465.3	7964.77	425.266	73492.9	266.709	226.645	268.535
												10.45	101467	239817	22298.8	37040.3	8571.66	350.553	80870.6	210.098	233.696	260.523
												10.46	100731	238501	21910.9	37054.5	8500.36	407.796	79746.3	214.221	233.098	250.741
												10.47	102411	241502	22746.4	35851.3	8655.97	334.356	81559.4	203.145	234.377	267.595
												10.48	99951.8	237551	21491.9	39920.1	8465.88	388.649	77488.9	225.829	233.366	261.352
												10.49	101140	240563	21869.6	38536.2	8641.42	394.693	76917.7	219.892	236.418	259.012
												10.5	98419.4	233476	20943.6	42656.6	8196.79	433.148	72888	237.727	227.735	325.84
												10.51	89289.7	215232	17368.6	60433.9	7299.38	561.442	65220.1	325.087	215.647	321.129
												10.52	88090	216960	16387.4	69841.2	7535.79	586.099	59413.1	371.58	224.921	268.073
												10.53	87477.1	214645	16325.8	68803.1	7392.79	577.454	61961	367.678	221.729	256.212
												10.54	103207	245886	22504.7	38390.3	8943.03	378.334	72563	215.886	241.093	302.492
												10.55	118777	276221	29926.1	21783.5	10673.7	257.985	77875.6	128.23	258.464	371.628
												10.56	126418	291616	33933.7	16723.8	11662.5	221.875	77792.1	100.773	267.997	407.95
												10.57	124370	288478	32568.7	18186.4	11471.5	248.59	75927.1	109.603	267.603	393.296
												10.58	122235	286580	31008.1	20874.2	11421.4	242.395	74321.9	123.265	270.947	353.56
												10.59	117455	274947	29013.3	23353.9	10640.5	263.627	77115.4	136.936	260.39	338.463
												10.6	118032	274985	29565	22200.3	10623.1	249.324	79754	130.604	258.689	337.271
												10.61	115529	271137	28119.9	24388.7	10431.6	266.953	79560.2	143.441	258.82	294.703
												10.62	111970	263413	26390.2	29037.5	9906.34	306.466	72912.4	165.255	251.31	379.536
												10.63	106328	252849	23737.7	35908.9	9340.06	335.081	71731.2	200.459	246.443	330.664
												10.64	98179.1	239068	19960	48680.3	8706.36	425.923	68520	270.389	243.752	229.086
												10.65	72955.5	181838	12024.5	107191	5855.9	833.466	54921.6	550.997	193.667	230.906
												10.66	66708.2	163205	10852.9	125102	4903.07	910.451	49938.3	603.698	167.543	430.465
												10.67	71514.2	173879	12170.8	108534	5341.19	761.731	53450.3	527.847	176.591	440.401
												10.68	74919.5	178835	13457.8	93155	5458.93	678.857	57175.1	453.524	175.863	565.149
												10.69	78255.9	185932	14489.1	80582.2	5758.86	653.51	61808.3	405.114	181.875	501.33
												10.7	73310.6	178158	12611.3	98477.1	5526.6	827.741	56375.8	498.171	181.263	372.849
												10.71	66573.4	165314	10526.3	126976	5069.36	1095.18	48580	635.792	174.225	319.108
												10.72	70039.6	172845	11452.8	113121	5366.59	1036.26	50491.2	573.736	180.048	341.231
												10.73	73188.1	178890	12460.5	105553	5591.05	829.311	51149	520.797	182.692	441.831
												10.74	71532.7	173799	12172.6	109260	5328.36	809.341	51252.2	529.659	175.746	499.295
												10.75	69593.4	168804	11700.1	112917	5094.35	896.326	50689	548.859	170.306	512.496
												10.76	61842.7	149896	9855.94	142897	4294.27	1062.8	44067	660.633	150.508	694.043
												10.77	54519.3	132051	8253.26	176613	3597.49	1208.04	38932.9	779.68	132.191	865.877
												10.78	56899.4	133554	9204.32	146131	3516.4	1101	46749.2	654.483	127.413	1089.46
												10.79	60740.2	137850	10665	113146	3536.99	1041.99	54793.1	519.078	124.456	1514.96
												10.8	55266.5	126556	9140.95	133933	3160.69	1342.45	50210.4	613.219	116.115	1394.96
												10.81	52689.1	119453	8651.4	130817	2878.2	1555.83	54827.1	616.449	108.58	1223.86
												10.82	50630.6	114672	8169.28	133417	2712.98	1757.88	56350.8	639.839	104.509	1070.93
												10.83	52380.5	117209	8769.88	117962	2764.53	1508.55	64641.5	573.592	105.256	990.794
												10.84	48550	107705	7973.52	124677	2431.8	1665.37	66788.5	605.667	95.8308	979.499
												10.85	50123.2	113375	8116.45	137110	2674.96	1372.09	60415.3	641.784	103.614	950.187
												10.86	49919.3	112922	8041.23	135836	2655.32	1598.39	58599	645.676	103.037	991.491
												10.87	53216.2	120859	8753.59	126569	2932.87	1512.72	58051.3	606.508	110.614	1009.1
												10.88	51285.1	117813	8153.47	144817	2867.09	1591.87	51183.1	675.146	109.385	1091.09
												10.89	47993.1	111502	7253.65	158115	2685.09	2113.88	48793.5	758.576	105.822	845.91
												10.9	51372.3	118745	8050.76	139444	2912.02	1973.6	52169.1	681.892	111.722	848.825
												10.91	46868.1	109694	6952.66	172549	2652.69	2007.51	45467.8	806.471	105.145	872.832
												10.92	50883.2	119464	7758.31	154436	2993.12	1939.01	46988.2	739.979	114.909	817.916
												10.93	54685.7	128640	8607.87	138105	3334.59	1449.8	54494.6	671.617	124.962	587.63
												10.94	55834.3	130213	9024.06	133835	3364.56	1210.56	56041.9	635.032	124.532	700.044
												10.95	60088.2	143316	9671.46	130896	3950.61	1173.83	52241.5	631.155	141.623	567.026
												10.96	77960	181762	14522.3	57750	5410.33	2369.57	58636.4	352.374	171.444	575.002
												10.99	109408	255193	25533	25124.1	9324.91	608.127	73871.7	159.234	240.462	348.309
												11	107978	249261	25479	23734.5	8921.71	635.232	79142.6	152.931	231.727	343.403
												11.01	108720	255412	24968.2	26715.2	9392.78	588.563	73327.1	168.014	243.825	313.225
												11.02	110687	260095	25605.1	27096.4	9635.01	600.347	66271.6	166.83	246.333	425.136
												11.03	112657	266502	26210.5	24929.1	10129.6	541.813	71208.3	157.972	256.721	291.117
												11.04	109724	259215	25095.4	27585	9653.6	559.396	70369	171.159	249.148	321.648
												11.05	111596	263310	25824.4	26374.4	9880.04	575.907	67757.8	164.162	251.613	362.016
												11.06	110385	257659	25890.9	24199	9482.94	612.484	74105.2	154.959	243.084	333.629
												11.07	107745	251093	24873.7	27473.7	9052.83	612	70964	169.462	235.648	415.638
												11.08	108992	255311	25170.8	26801.7	9353.14	584.043	71783.2	166.816	241.992	358.278
												11.09	105424	246905	23742.1	30782.9	8828.84	641.204	68285.5	186.508	233.444	430.61
												11.1	106841	250938	24150.6	31001.6	9077.11	598.083	66090.6	185.394	237.765	456.29
												11.11	106699	250083	24212.4	29990.2	9023.88	601.997	68520.5	181.525	236.69	422.249
												11.12	105229	245156	23985.7	29105.8	8721.86	587.651	74303.2	178.157	230.967	374.763
												11.13	107665	250211	25007.4	27415.7	8989.8	564.244	72632.2	167.554	233.977	420.759
												11.14	105532	244678	24276.2	28558.2	8652.02	596.704	73439.5	174.153	228.222	428.383
												11.15	106865	250373	24401.9	28957.4	9070.55	534.559	73670.3	176.418	238.009	347.418
												11.16	105703	245305	24330.4	28575.3	8700.98	569.172	74280.8	173.836	229.366	410.291
												11.17	95714.3	219128	21185.1	33886.6	7194	688.341	80715.6	203.708	202.009	426.748
												11.18	89565.2	205033	19110.1	39144.9	6500.1	696.859	86177.3	232.259	190.526	356.934
												11.19	86946.3	206361	16861.9	50865.5	6707.35	1275.44	64256	306.866	201.246	357.104
												11.2	78478.6	191256	13670.4	74910.3	6103.34	1836.36	51429.6	435.916	193.909	366.895
												11.21	73319.4	178217	12513.8	87321.4	5514.57	1228.89	59633.6	481.603	182.288	275.735
												11.22	67340.4	167826	10568.3	111959	5185.8	1470.48	54124.4	613.136	179.48	196.553
												11.23	65337.7	163819	10044.9	125617	5050.55	1327.57	51518.9	663.582	176.802	202.099
												11.24	61233.7	156158	8904.38	150255	4813.82	1447.65	46261.9	778.966	173.266	177.472
												11.25	55075.3	142084	7529.95	187313	4283.65	1657.78	39207.1	934.89	160.169	192.889
												11.26	55534	142753	7649.52	179462	4288.18	1674.97	41683.6	910.49	160.482	176.36
												11.27	42256.2	112731	4962.63	278075	3275.41	2672.79	27647.5	1355.9	134.126	151.584
												11.28	40411.9	108145	4659.79	294417	3117.7	2706.82	26227.5	1417.29	129.275	151.921
												11.29	48615.4	127433	6170.49	229429	3767.77	2120.38	33037.6	1130.03	147.308	177.312
												11.3	61297	156416	8912.35	147241	4830.22	1395.43	49183	773.047	174.514	147.633
												11.31	74803.7	185097	12645.4	92972	5973.12	795.5	63640.2	498.043	196.324	175.804
												11.32	76891.3	188034	13445.6	84894.4	6039.67	747.516	65187.2	453.443	195.13	216.412
												11.33	78772.8	194293	13766.7	82096	6402.72	714.065	66361.8	445.79	204.881	172.738
												11.34	73868.1	181820	12539.2	95908.7	5790.32	731.339	63727.7	501.562	191.067	200.877
												11.35	75911.1	187765	12947.8	89178.5	6102.36	763.089	65578.8	481.662	199.284	164.086
												11.36	76189.7	187823	13098.2	88778.4	6084.26	733.533	65238.3	474.607	197.969	181.846
												11.37	77166.7	189481	13432.4	84299.2	6137.38	746.747	66221.2	454.989	198.335	188.547
												11.38	76334	187463	13219.2	90727	6039.34	705.707	62395.7	473.456	195.502	230.096
												11.39	76046.1	186175	13176.1	86231.2	5953.14	818.01	64274.5	464.019	193.547	214.146
												11.4	78334.4	191110	13885.2	80278.1	6172.92	737.114	66311.8	432.645	197.499	217.428
												11.41	61021.3	153118	9104.08	138783	4598.98	1285.52	54225.6	726.109	166.741	163.37
												11.42	48499.5	124397	6368.29	214370	3547.36	1702.04	40375.2	1049.08	140.045	172.336
												11.43	52257.1	133072	7114.62	178783	3843.6	1679.3	49521.7	929.782	149.357	123.379
												11.44	53800.4	135662	7534.83	165166	3902.4	1522.37	53903	862.832	150.137	126.779
												11.45	56336.2	141213	8113.45	145075	4096.42	1476.23	60654.8	784.84	155.475	107.353
												11.46	55520	138927	7971.26	151638	3995.9	1479.38	57381.1	802.722	151.971	129.86
												11.47	46519.2	120981	5887.39	235823	3479.56	1929.46	35463.6	1147.02	138.843	167.191
												11.48	39149.7	103584	4563.38	303301	2909.41	2371.58	25963.1	1403.49	121.33	198.039
												11.49	43482.7	115446	5199.25	266498	3358.88	2394.91	30029	1302.19	136.677	143.876
												11.5	41191.3	108227	4915.46	279044	3043.3	2412.16	28783	1324.54	125.668	188.994
												11.51	40233.3	106270	4715.78	285468	2988.63	2615.24	28419.8	1372	124.703	164.361
												11.52	33172.2	88359.9	3599.59	343865	2376.51	3483.6	22842.4	1621.22	104.956	168.585
												11.53	38361.7	100782	4394.07	278070	2740.17	4209.4	28415.9	1418.76	117.484	156.057
												11.54	43752.5	113936	5300.6	232715	3178.85	4060.05	32488.8	1231.51	130.87	160.744
												11.55	44750	114579	5652.73	230317	3147.97	3093	32116.5	1146.72	127.168	267.844
												11.56	45071.2	114016	5835.09	228637	3085.36	2755.39	31583.6	1099.43	123.486	382.776
												11.57	45240.2	112600	6025.13	223585	2974.4	2546	31585.2	1043.49	118.25	565.589
												11.58	46627.6	115000	6358.55	207922	3020.94	2515.83	33877.8	981.827	119.114	594.259
												11.59	51653.9	125980	7463.48	175194	3373.48	2128.59	38759.3	842.313	128.236	612.1
												11.6	55353.5	132586	8498.85	148893	3549.76	1585.49	46967.1	718.545	131.72	605.913
												11.61	56629.6	138344	8510.81	151868	3856.6	1569.31	46267.5	747.528	142.27	419.796
												11.62	55373.9	136659	8135.28	167156	3844.07	1490.8	42874.9	802.55	142.618	415.09
												11.63	55149.5	136703	8029.17	170702	3865.31	1557.13	41423.1	820.461	143.524	409.745
												11.64	52879.2	130604	7623.73	179624	3616.92	1479.32	42294	849.865	136.721	404.744
												11.65	53547.4	132906	7701.32	179655	3727.95	1477.63	41555.6	852.514	140.137	387.097
												11.66	50192.8	123450	7148.5	193932	3334.8	1447.31	40741.1	891.25	128.252	468.725
												11.67	52780.1	129133	7757.6	183505	3530.55	1222.24	41581.9	829.431	132.616	549.906
												11.68	52963	129784	7797.66	186870	3567.83	1109.56	41190	831.578	133.54	561.162
												11.69	51878.1	125508	7688.87	174672	3343.59	1258.35	46564.2	805.837	127.383	495.283
												11.7	53013.8	126641	8083.95	162249	3332.92	1217.95	49110.2	749.667	125.844	579.685
												11.71	53626.9	125734	8431.11	144724	3220.28	1369.62	52839.7	685.201	121.235	690.966
												11.72	49889.8	116639	7639.63	150942	2891.4	1456.77	58109.1	727.584	113.125	506.54
												11.73	45558.3	105367	6841.6	164585	2481.47	1533.51	58311.5	776.51	100.702	567.686
												11.74	40450.9	94948.3	5688.1	212048	2198.34	1623.95	46801.1	942.874	92.4586	658.219
												11.75	52430	119114	8594.22	125405	2881.9	1317.36	65464.7	606.924	110.118	714.546
												11.76	48425.9	113118	7366.33	167320	2774.55	1298.11	52762.1	763.731	108.925	686.634
												11.77	43212.9	100403	6343.29	187757	2343.25	1335.81	54222.4	843.587	96.5492	617.586
												11.78	48634.7	113816	7380.36	163652	2802.59	1342.56	54576.9	760.574	110.227	594.167
												11.79	59603.6	136663	10176.8	101273	3535.99	1271.55	69360.1	519.479	128.16	546.673
												11.8	51819.2	119107	8280.36	138589	2916.38	1439.77	56981.7	657.92	111.492	813.036
												11.81	48511.3	111560	7511.33	144569	2660.67	1718	59441.6	704.738	105.279	630.79
												11.82	46592.3	108376	6998.1	167993	2597.1	1539.73	53567	781.994	103.911	659.359
												11.83	52060.9	122374	8090.92	160772	3118.85	1175.9	49582.6	725.48	118.177	797.756
												11.84	59816.7	139559	9951.67	119809	3710.4	1176.31	56678.5	579.039	133.164	715.342
												11.85	50915.5	122640	7591.82	194465	3234.94	1112.2	38450.9	827.407	121.854	958.745
												11.86	54482.3	132921	8140.95	175870	3659.58	1248.94	40510.5	795.082	135.286	650.74
												11.87	50769.4	123777	7349.11	173411	3306.53	1362.65	51248.3	835.451	128.528	301.312
												11.88	46092.5	111875	6443.04	172940	2858.37	1520.66	64572.1	884.236	117.841	146.211
												11.89	39361.9	97518.6	5085.94	269779	2459.74	1761.44	31378.5	1157.92	102.27	567.461
												11.9	39574.2	98477.6	5080.92	269826	2504.34	1904.94	30444.8	1169.84	103.885	553.543
												11.91	42322.7	103947	5656.67	234533	2636.89	1726.06	37967.3	1053.93	108.264	452.996
												11.92	53091.8	128016	7961.91	151776	3417.81	1284.38	58301.1	750.96	131.087	280.053
												11.93	53489.3	129031	8063.16	150594	3463.19	1134.65	60951.9	741.52	132.584	252.942
												11.94	52677.6	131056	7535.38	184435	3677.86	1181.88	45873	867.096	139.886	286.322
												11.95	53769.2	133885	7762.12	184932	3796.42	1103.01	43898.8	854.03	142.491	332.329
												11.96	56774.8	141608	8338.57	168884	4104.94	1143.96	45378.6	803.04	151.091	305.251
												11.97	57194.6	141148	8545.37	153737	4028.58	1191.04	51478.4	755.721	148.945	266.002
												11.98	57005.9	140681	8512.29	151009	4012.42	1133.87	55256.6	751.13	149.235	217.795
												11.99	52597.2	131554	7451.21	186407	3719.9	1231.11	45322.2	883.919	141.723	260.072
												12	54337.5	135781	7804.86	177655	3879.04	1237.39	45520.6	849.271	145.795	271.568
												12.01	55482.1	139138	7980.73	172281	4026.37	1291.61	45738.3	837.53	150.29	250.026
												12.02	53660.2	134683	7596.24	177682	3851.21	1357.45	46736.2	870.17	146.229	219.469
												12.03	51741	131695	7077.71	198191	3805.04	1373.57	42533.6	954.642	146.091	201.42
												12.04	56014.6	141153	8015.1	169730	4127.73	1369.33	45889.7	839.877	153.818	221.2
												12.05	54143.4	138747	7452.76	188381	4118.8	1406.65	42658	927.076	155.516	179.697
												12.06	50349.7	129616	6691.37	212569	3776.44	1537.05	38732.9	1023.72	146.141	191.897
												12.07	51296.9	133097	6768.4	206901	3948.89	1625.13	39908.3	1025.84	152.478	148.962
												12.08	52006.5	132701	7087.44	197754	3852.82	1504.38	40916.3	959.81	147.46	209.472
												12.09	56419.2	143947	7938.5	173186	4305.56	1413.87	44706.2	868.042	160.194	180.7
												12.1	53412.5	137676	7220.17	190232	4096.43	1636.23	42083.8	958.729	156.023	155.419
												12.11	54337.1	138641	7497.79	178775	4078.43	1710.7	43394.6	908.397	154.345	180.191
												12.12	61119	154119	9026.05	140321	4659.75	1484.79	50840.3	741.705	168.617	170.863
												12.13	55509.2	140686	7808.7	168241	4127.82	1619.22	46406.4	861.47	155.223	178.571
												12.14	47926.3	123180	6170.27	203849	3484.19	2603.22	40624.6	1068.39	139.462	143.764
												12.15	44781.1	114760	5648.53	227160	3156.89	2960.32	34398.6	1144.83	128.202	218.74
												12.16	39953.3	100843	4977.31	263532	2614.97	3076.86	27642.6	1221.02	108.509	478.996
												12.163	44759.1	115817	5575.85	240453	3243.36	3119.82	29431.3	1186.31	130.287	269.044
												12.1774	41623	105599	5233.34	259839	2804.09	2872.42	26877.7	1196.53	114.206	497.429
												12.1918	43338	108863	5614.48	245906	2882.71	2747.51	27226.8	1121.95	115.384	644.431
												12.2062	45080.1	112894	5941.71	230758	3010.41	2717.21	28973.8	1070.66	119.228	614.963
												12.2206	44208	109695	5879.77	234690	2865.9	2568.99	28542.8	1060.96	113.861	778.758
												12.235	42498.8	105476	5625.34	258587	2738.03	2036.88	26250.4	1098.2	109.083	974.261
												12.2473	37559.7	92115.3	4883.99	290498	2262.65	1634.29	26987.2	1167.05	94.0127	1023.91
												12.2581	40060.1	96779.1	5417.7	253656	2356.15	1584.61	33187.2	1058.1	97.0814	904.116
												12.269	45651	109521	6533.88	209686	2751.35	1368.12	40182.1	910.041	109.078	766.169
												12.2798	50471.5	116289	7978.88	153794	2834.72	1261.4	52846.4	695.841	108.882	975.39
												12.2906	56418.6	129440	9399.52	123200	3273.8	1219.27	58677.1	585.918	120.395	877.064
												12.3015	58099	138979	9177.44	145451	3796.76	1213.39	46683	678.01	137.229	715.143
												12.3123	60040	149369	9039.93	155856	4400.83	1255.75	42725.6	748.019	157.437	397.128
												12.3231	64450.6	162444	9774.93	133130	5022.72	1302.17	49555.7	693.726	176.673	201.374
												12.334	60560.2	154714	8721.42	153472	4755.71	1621.86	44047.5	798.35	171.759	189.325
												12.3448	62038.2	156159	9233.09	139510	4731.84	1603.8	46817.4	730.804	169.137	224.998
												12.3557	66739.5	167708	10287	118188	5226.52	1531.37	51418.5	644.921	181.567	188.211
												12.3665	65743.9	165971	10017.5	127183	5183.45	1383.62	49860.3	675.901	180.955	190.179
												12.3773	62766.1	157597	9455.04	135163	4788.05	1374.7	50692.9	707.092	170.732	197.703
												12.3882	61482.3	155108	9144.3	150070	4717.07	1229.37	46428.8	750.562	168.611	234.176
												12.399	67335.8	170013	10420.9	124325	5380.21	1097.4	52644.1	651.126	185.83	174.718
												12.4099	69862.1	176885	10947.9	118723	5712.13	1078.58	51380.5	624.79	193.615	181.496
												12.4207	69195.9	175262	10793.6	121321	5640.53	1066.13	51321.5	635.181	192.047	180.311
												12.4315	68720.7	175260	10560.2	127559	5681.44	1129.71	47868.7	663.597	193.64	186.913
												12.4424	61880.4	158015	9001.78	147446	4896.34	1581.02	45059.4	772.953	175.346	183.491
												12.4532	56995.7	146696	7887.22	170461	4449.32	1949.87	40749.9	887.215	164.829	180.925
												12.464	57263.3	146584	8012.77	166308	4416.67	1847.76	42456.4	863.926	163.461	184.784
												12.4749	55220.1	140840	7682.17	179389	4168.66	1689.35	40721.3	896.699	155.812	223.043
												12.4857	53951.7	137450	7486.6	192473	4037.9	1465.06	38778.8	922.217	151.37	265.928
												12.4966	54157.4	141209	7283.7	207453	4323.08	1436.51	35151.9	991.252	161.227	210.594
												12.5074	57835.3	152017	7857.14	188579	4821.22	1563.22	36201.4	941.792	175.94	170.447
												12.5182	60779.3	157309	8654.46	169930	4966.41	1285.57	39892.2	840.396	177.566	201.413
												12.5291	60389.7	154953	8651.12	159419	4798.6	1473.64	43284.5	815.578	173.215	184.983
												12.5399	56706.2	147896	7691.76	180711	4581.39	1821.29	39360.5	933.687	169.958	150.443
												12.5507	55724.5	145098	7548.99	189413	4461.97	1661	38184	950.987	166.005	171.053
												12.5616	61884.3	161489	8746.2	164645	5196.49	1381.76	40750.5	839.947	185.231	157.238
												12.5724	61707.6	160814	8745.81	167194	5163.61	1286.05	40616.7	840.546	183.961	166.168
												12.5833	59876.6	155908	8389.12	174882	4939.9	1333.09	39788.9	871.808	178.11	173.093
												12.5941	58219.2	150838	8093.84	176255	4678.86	1568.29	39338.9	888.034	170.888	186.707
												12.6049	56089.5	144746	7686.76	177171	4384.56	1921.16	39911.6	913.828	163.345	178.806
												12.6158	55509.3	144703	7484.26	190930	4448.25	1797.33	36772.2	961.226	165.515	181.357
												12.6266	57981.9	151635	7910.8	173277	4760.65	1664.48	42697.6	909.978	175.936	117.059
												12.6374	58505.3	150962	8204.33	171866	4661.35	1502.67	41171.6	868.07	170.231	182.17
												12.6483	57774	148981	8061.9	173463	4571.26	1547.84	41452.1	878.698	168.009	177.536
												12.6589	56516.8	147253	7654.61	175746	4543.34	1865.55	42224.6	927.616	169.801	124.402
												12.6692	50113	130679	6448.43	209929	3857.64	2382.54	35891.4	1075.64	150.254	159.615
												12.6794	48350.3	126812	6097.33	228027	3737.95	2443.03	32252.9	1140.59	146.572	179.94
												12.7	53670.9	141728	6944.26	195801	4373.8	2498.59	35782.4	1038.37	166.163	130.105
												12.7102	58320.6	153415	7863.7	175711	4859.62	2213.18	36484.5	932.146	177.94	151.347
												12.7205	57339.7	149051	7823.49	175765	4601.84	2170.21	36872.7	916.466	169.353	189.403
												12.7307	59570.8	154111	8313.64	160464	4789.6	2077.49	40171.4	854.403	174.231	172.687
												12.741	63829.4	163134	9370.96	135593	5118.69	1738.61	46768.1	737.094	181.531	160.935
												12.7513	64415.8	163646	9615.8	136002	5113.41	1518.45	46173.1	717.715	179.759	199.739
												12.7615	63720	161801	9485.47	136093	5033.47	1425.1	49200.9	721.368	178.489	168.709
												12.7718	55839.7	143699	7663.31	174594	4322.86	1972.82	41057.8	907.79	161.695	173.392
												12.7821	56724.3	146960	7744.52	172570	4493.42	2068.64	40500.9	910.65	167.161	155.791
												12.7923	56980.3	148348	7717.47	170249	4574.03	2245.67	40784.9	917.972	170.363	134.529
												12.8026	56073.7	145554	7561.87	173088	4433.08	2557.28	38477.7	931.249	165.709	161.915
												12.8124	62750	160209	9181.23	143749	4989.77	1603.11	45037.6	758.024	177.585	185.856
												12.8203	73351.4	183191	11994.1	97053.1	5913.33	1180.9	56809.7	537.213	196.402	179.676
												12.8282	81722.5	201170	14550.4	69506.8	6723.22	884.746	68683.3	402.43	211.581	150.826
												12.8361	78180.1	193778	13314.5	79947.1	6361.05	1350.32	57203.8	462.619	204.3	201.709
												12.844	63165.3	160946	9287.57	138783	5007.44	1654.01	46478.8	742.235	178.087	176.421
												12.8519	54616.2	141146	7366.64	184246	4235.78	2279.46	36942.2	951.997	159.103	201.34
												12.8598	52367	137955	6679.87	194489	4182.97	3583.05	33277.6	1062.94	160.492	150.093
												12.8677	55391.4	144786	7308.16	176888	4424.28	3540.3	33836.3	972.864	165.648	182.109
												12.8755	63864.9	164625	9188.72	137377	5217.1	2452.98	40639.3	765.967	184.354	183.262
												12.8834	70466.8	177542	11085.3	108293	5687.21	1533.57	50457.3	600.302	192.331	193.506
												12.8913	71903.1	181973	11363	106114	5930.7	1379.06	51821	589.328	198.926	168.455
												12.8992	69043.6	174714	10673.8	113510	5581.62	1622.05	49561.1	629.993	190.794	180.734
												12.9071	66632.4	169055	10087.4	121798	5339.04	1689.28	48899	671.633	185.713	171.992
												12.915	60034.6	155151	8437.95	158417	4834.74	1851.33	42178.2	840.043	175.582	159.152
												12.9229	60854.2	158179	8535.34	158748	5005.34	1767.84	41893.9	842.063	180.714	146.239
												12.9466	73803.3	185592	11954.2	103584	6062.96	1236.58	49791.8	559.659	199.557	228.652
												12.9545	69242.8	172551	11026.6	117057	5395.87	1360.13	46026.6	607.964	182.014	333.985
												12.9624	63833.8	162244	9465.5	138929	5048.67	1683.1	43672.2	732.161	177.774	224.976
												12.9702	61427.4	155416	8989.29	145812	4716.53	2057.2	40355	764.425	168.287	288.229
												12.9781	63742.9	160517	9600.23	139367	4922.5	1583.91	42698.2	715.225	172.56	300.134
												12.986	68409.4	170526	10841.9	118762	5311.57	1285.75	48013.1	616.47	180.642	294.994
												12.9939	73215.2	182333	12037.6	100716	5857.83	1072.79	54855.6	540.492	193.928	219.145
												13.0018	69042.9	173886	10831.7	124033	5531.97	1190.47	45945.5	635.79	187.062	275.675
												13.0097	73625.5	183424	12160.6	103342	5917.67	948.948	53855.5	541.335	194.859	239.108
												13.0176	86439.2	209538	16321.3	63741.8	7041.38	669.424	65727	350.619	212.71	263.719
												13.0255	81868.6	202110	14489.7	79060.9	6766.64	854.627	57177.1	429.362	210.793	256.161
												13.0334	75550	186581	12816.6	94782	6009.94	929.757	55409	499.899	195.129	269.402
												13.0413	87671.1	214921	16358.8	61811.1	7400.08	728.446	65950.9	351.735	222.742	198
												13.0492	91215.6	220498	17873.4	55509.5	7602.06	587.296	67270.3	308.657	222.401	266.732
												13.0571	89316	216136	17296.4	57312.2	7392.61	571.45	70796.3	319.515	219.485	224.766
												13.0728	88315.7	213436	17021.1	60474.3	7235.24	565.583	68503.1	330.229	215.798	259.323
												13.08	88106.7	212336	17094.7	60167.2	7174.28	497.805	72002.4	325.601	214.328	244.879
												13.0871	82887.9	203714	14970.4	76791.8	6841.32	639.626	62542.8	408.945	211.843	233.772
												13.0943	72817.3	182084	11939.2	110634	5890.64	802.513	53649.7	562.435	194.782	233.266
												13.1014	68999.2	173007	10961.3	125273	5481.7	915.335	49283.4	624.603	185.446	265.562
												13.1086	72243.6	181852	11643.6	114784	5913.64	919.356	50208.5	587.331	196.141	235.886
												13.1157	78651.6	194114	13659.4	92850.3	6368.87	795.953	52103	475.012	201.352	349.955
												13.1229	87103.6	215309	15967.7	70776.7	7467.62	675.278	58624	383.494	224.698	247.269
												13.1371	83688.9	208691	14779.2	79101.6	7183.27	749.872	57400.1	428.827	221.548	211.809
												13.1443	80272.8	201758	13623.9	89233	6865.18	968.484	51678.2	483.578	216.267	227.264
												13.1514	77008.5	194581	12646.7	99972.2	6531.21	1167.42	47034.2	536.839	209.727	252.544
												13.1586	76344.9	193801	12382.7	99881.7	6525.76	1223.08	48920.5	547.875	211.437	198.979
												13.1657	72956.7	185158	11562	111626	6097.73	1352.52	45192.8	597.522	201.273	242.523
												13.1729	69153.9	176205	10594.7	119237	5697.21	1549.8	46937.3	650.895	194.117	185.444
												13.18	62032	158850	8976.49	152634	4943.82	1811.47	39244.4	789.483	175.447	249.662
												13.1871	63015.8	162645	9041.48	146105	5150.75	1994.83	40936.1	786.896	182.74	182.738
												13.1943	64057.4	165544	9263.57	146269	5296.49	1778.56	40563.1	775.707	186.112	190.756
												13.2014	70066.1	176210	11059.3	114380	5621.72	1334.7	48597.9	609.933	189.723	234.507
												13.2157	69400.6	175608	10811.4	119594	5636.27	1287.71	48113.8	633.838	191.201	212.267
												13.2229	66392.6	170526	9873.48	132648	5491.46	1502.68	46087.5	712.913	190.853	161.401
												13.23	72781.7	183488	11690.7	104202	5990.96	1126.04	54602.4	568.603	199.699	166.975
												13.2389	84239.4	208423	15144.3	70781.9	7127.09	746.947	64707.4	397.341	219.911	172.254
												13.249	85588.5	210627	15650.3	66748.7	7200.53	754.01	64857.5	376.67	219.881	191.068
												13.2591	85385.7	209306	15744.8	66171.8	7118.83	664.38	68310.2	369.915	217.712	183.811
												13.2693	84418.9	207949	15348.1	73354.4	7076.72	625.029	63718.8	395.757	217.259	211.018
												13.2794	72651.8	184145	11612.2	113995	6069.92	921.732	51351.6	592.872	201.472	189.562
												13.2895	68833.8	174863	10648.5	125001	5636.84	1134.79	48645.7	651.617	192	194.214
												13.2997	66113.6	169585	9856.34	135565	5446.72	1367.48	46175.5	715.797	189.371	169.164
												13.3098	63662.6	162849	9368.54	144333	5124.43	1446.45	44586.7	750.757	180.847	190.938
												13.3199	62000.9	159106	8949.95	151754	4970.6	1692.68	41570	790.674	177.152	204.888
												13.33	55665	143254	7603.33	174867	4296.4	2340.8	38275	916.009	160.456	202.489
												13.3402	49508.3	127700	6408.83	202477	3673.42	3001.98	35240.3	1055.37	143.814	200.334
												13.3503	50546.5	132213	6465.86	206913	3924.72	2947.65	33389.1	1080.97	152.068	175.652
												13.3604	52364.7	136387	6822.32	190522	4066.96	2914.66	36611.7	1020.81	156.343	155.421
												13.3706	56312.5	146030	7610.62	167468	4444.76	2569.41	40959.1	917.439	166.661	138.501
												13.3807	62764.1	160109	9176.7	138827	4974.89	1727.98	46944.2	749.548	177.749	164.118
												13.3908	66082.8	167255	10060.7	127645	5258.87	1328.34	49988.6	677.134	183.202	181.014
												13.3995	61879.4	157399	9070.28	141958	4851.9	1435.47	50175.7	752.649	174.734	149.381
												13.4082	53597.3	138565	7194.01	188795	4139.07	1944.54	39912	967.759	157.315	162.858
												13.4168	52773.4	137357	6945.48	192126	4117.04	2228.13	39214.4	1005.7	157.899	139.845
												13.4255	44048.7	115758	5313.88	244850	3301.36	3298.35	31245	1256.39	134.783	154.462
												13.4342	44992.3	118297	5446.8	235453	3393.6	3652.69	31512.4	1234.88	137.802	150.051
												13.4515	49290.6	128018	6244.59	192891	3697.8	4101.62	36867.1	1076.81	146.639	138.687
												13.4602	50751.1	131198	6549.1	180541	3800.48	3885.75	39838.8	1021.52	149.547	129.211
												13.4688	48165	124830	6100.35	204560	3574.83	3422.53	36433	1098.39	142.446	153.086
												13.4775	47975.7	124667	6049.11	208271	3582.94	3331.8	36014.9	1112.57	142.874	149.331
												13.4862	42643.5	112520	5019.53	248987	3183.08	4446.47	29214.6	1315	131.683	151.61
												13.4948	36972.3	97425.3	4133.58	282113	2620.16	5705.36	26574.1	1481.52	113.966	154.846
												13.5035	36927.4	98918.4	4024.91	291241	2733.87	6277.41	24688.9	1553.8	118.733	127.276
												13.5122	40490	107551	4564.45	246342	2996.72	7610.15	28673.7	1408.08	127.774	112.345
												13.5299	48013.8	125124	5970.66	201630	3594.26	5150.14	32462.8	1126.67	143.181	168.996
												13.5389	50627	129143	6708.94	189802	3672.75	3208.7	35615.4	995.028	142.38	251.995
												13.5479	48507.9	122678	6416.23	199767	3390.66	3165.29	34376	1016.8	133.073	322.333
												13.5569	46026.3	116171	5981.57	215031	3141.1	3626.32	30689.6	1072.59	124.929	420.658
												13.566	44664.8	110878	5850.76	205536	2876.01	4441.3	32083.1	1046.41	116.194	492.443
												13.575	42409.8	106284	5383.04	227667	2754.79	4492.23	29401.7	1136.91	113.013	473.529
												13.584	41641.3	104339	5261.57	236533	2690.55	4492.62	27554.5	1158.14	110.506	555.999
												13.593	43739.1	107195	5808.47	207113	2705.81	4188.94	32118.8	1026.77	109.793	646.284
												13.6021	41304.8	101018	5425.26	225669	2501.51	3192.46	33887.2	1074.24	103.769	575.266
												13.6111	45618.8	109111	6434.71	177189	2696.14	2492.73	47612.5	883.644	109.504	431.649
												13.6201	42969.8	106667	5662.5	235024	2762.71	2051.95	35181.4	1078.73	112.644	433.656
												13.6291	48551.3	121389	6668.57	212977	3332.23	1442.02	38393.1	974.042	129.746	368.822
												13.6382	55600.3	139540	8040.95	184252	4059.94	1110.7	40870.8	848.596	149.652	354.79
												13.6472	56658.8	144584	8012.11	176532	4341.78	1241.13	44397.7	865.877	160.802	190.679
												13.6562	58096.1	149309	8228.42	179944	4585.95	1181.62	40803	867.186	167.003	215.781
												13.6652	60251.3	154703	8656.85	165947	4805.53	1222.75	43011.8	822.41	173.048	194.395
												13.6743	60553.3	156456	8619.32	165342	4914.37	1311.38	42654.2	833.434	176.939	170.804
												13.6833	62117	160558	8945.5	159255	5101.9	1204.14	44169.8	805.27	181.885	160.04
												13.6923	62650.6	161324	9113.6	153623	5114.11	1146.34	46723.5	781.691	182.102	150.752
												13.7014	60778.3	156276	8754.83	163708	4885.21	1150.37	44521.9	814.255	175.607	174.444
												13.7104	58448.4	150084	8232.94	162622	4588.98	1586.47	45227.3	846.077	168.879	152.166
												13.7194	60345.8	154499	8675.9	157395	4767.47	1422.81	44951.1	807.216	172.466	175.473
												13.7284	60239.5	153488	8717.05	156174	4695.8	1436.84	44804.5	797.048	169.781	196.373
												13.7375	56961.6	144596	8081.04	167833	4296.54	1648.14	42588.7	847.916	158.784	226.3
												13.7465	61397.3	153348	9218.93	140782	4572.59	1538.15	46643.6	723.64	163.726	271.166
												13.7555	68914.4	171410	11004.5	112497	5341.74	1236.55	52378.1	595.801	181.911	241.738
												13.7645	68000.2	170353	10702.4	123231	5345.51	1094.35	49863.5	631.642	182.665	246.221
												13.7736	72367.3	180782	11797.8	104479	5812.6	985.102	56173.4	555.997	193.827	194.407
												13.7826	86909.2	211836	16335.2	62484.3	7208.74	650.551	68384.8	349.435	217.835	207.736
												13.7916	92191	220047	18569.1	50062.7	7492.84	600.633	70202.1	282.243	217.332	301.127
												13.8008	73728.9	185810	11969.1	104289	6111.23	940.154	55660.3	557.704	202.171	168.33
												13.811	67129.8	169697	10362.8	126147	5375.65	1064.26	52620.3	657.373	185.918	171.514
												13.8211	67460.6	168036	10629.7	113298	5198.29	1321.33	54743.7	611.515	179.623	198.496
												13.8312	68994.5	169839	11202.4	106598	5209.91	1261.31	54638.7	568.301	177.322	265.487
												13.8413	69249.5	171886	11120	110773	5350.54	1231.8	52579.7	586.752	181.709	251.029
												13.8514	77919.4	192252	13471.7	79217.3	6293.34	917.961	66725.2	448.245	203.152	155.372
												13.8615	78055.1	188544	13976.3	80611.4	5968.55	856.447	60499.3	427.93	190.047	343.365
												13.8716	71193.5	179938	11271.5	109936	5840.35	1135.05	54070.3	595.571	196.859	160.808
												13.8818	69852	175569	11059.5	110674	5602.74	1139.86	55771.7	598.367	190.721	163.667
												13.8919	80785.8	200023	14167.1	74672.8	6704.47	850.512	66803.2	425.311	212.345	147.242
												13.902	86928.6	212480	16257.3	60603.8	7265.7	699.037	70303.2	347.585	220.134	174.376
												13.9222	92002.6	224187	17934.7	48996	7897.05	631.131	77069.2	293.506	231.825	139.15
												13.9323	93544.2	225245	18774.5	50058.5	7845.88	534.699	71321.6	282.528	226.202	244.304
												13.9425	82731.2	204796	14734.5	76235.1	6946.07	699.408	63484.2	416.924	216.153	185.204
												13.9526	77237.7	190099	13399.1	87150.2	6179.32	731.12	63644.9	463.771	199.252	204.367
												13.9627	78481.4	195638	13424.7	78747.3	6541.27	855.156	70141.2	453.402	211.419	108.474
												13.9728	57955.5	147989	8197.01	160305	4466.79	1640.94	46257.1	837.186	165.145	158.663
												13.983	54586.8	141729	7304.51	179601	4282.81	2164.98	41631.3	955.739	162.559	130.076
												13.9933	51099.7	133390	6566.99	195045	3954.69	2962.88	37642.9	1052.94	154.081	132.112
												14.0036	53977	139790	7187.44	176893	4178.64	2574.52	41182.9	959.929	159.596	134.268
												14.0138	61877.9	158588	8900.52	135177	4929.76	1914.19	51332.7	762.63	178.953	108.946
												14.0241	60670	153422	8846.57	133832	4634.15	1822.78	53751.8	744.66	169.569	127.506
												14.0343	70557.7	177102	11241.4	102084	5667.03	1189.81	60967.6	573.032	193.075	127.212
												14.0446	75779.1	186857	12932	87948.5	6025.73	890.611	62939.9	479.57	196.647	190.257
												14.0549	81576.1	199262	14744.1	71833.6	6582.48	729.28	68425.2	398.209	206.44	192.51
												14.0651	92891.5	224804	18471.4	47819.5	7889.63	542.601	78638.6	280.652	229.662	158.221
												14.0754	89811.5	215914	17658.3	53970.8	7343.09	562.853	73736.9	303.587	217.181	227.325
												14.0857	94243.2	226408	19051.7	47439.9	7891.14	574.665	71882.8	272.685	226.483	242.745
												14.0959	87797.9	214181	16586.6	63535.1	7335.23	595.675	66461.9	348.434	219.969	229.753
												14.1062	82651.8	203083	14912.3	76308.6	6809.46	646.537	63545.1	408.664	211.372	222.77
												14.1165	71604.6	180443	11475.9	112774	5858.45	911.392	54250.7	588.793	196.229	181.726
												14.1267	55672.7	144311	7546.74	172778	4387.83	1873.13	45283	922.105	165.8	112.005
												14.1359	52976.3	137802	6975.99	189144	4127.55	2394.77	38949.1	999.828	158.136	142.605
												14.1442	49876.1	130756	6309.73	204753	3870.81	3063.13	36001.8	1097.92	151.99	131.221
												14.1525	45703.2	119734	5583.9	226815	3428.27	3820.71	32246	1203.26	138.648	154.276
												14.1609	47923.3	126385	5883.26	214159	3713	4137.73	32497.3	1171.05	147.87	135.68
												14.1692	51171.2	134028	6532.56	197164	3993.52	3376.25	34758.5	1067.96	154.92	149.154
												14.1775	66935.6	169502	10183.3	120260	5347.02	1696.22	48814.8	662.98	185.476	180.559
												14.1859	74226.9	181678	12633.2	85357.6	5724.92	1122.32	63259.2	477.853	188.925	203.587
												14.1949	62730.9	158861	9279.4	131203	4880.55	1656.03	52196.6	720.26	175.32	142.19
												14.205	57266.8	146716	7977.86	158631	4418.97	2012.14	46107.5	856.027	164.875	139.31
												14.2152	64123.1	162139	9603.94	127741	5015.09	1622.98	51058.3	697.868	177.915	160.549
												14.2254	62777.3	157907	9379.37	129339	4797.74	1733.6	50937.3	705.574	171.771	175.452
												14.2355	65771.5	166617	9952.09	121530	5230.61	1478.17	54053.9	671.556	183.947	135.581
												14.2457	73280	180626	12264.8	93177.9	5719.6	1054.91	60372.8	509.076	189.769	205.327
												14.2558	83797.4	204945	15319.5	66167.4	6875.14	765.023	69092.3	376.42	212.713	178.22
												14.266	86051	207817	16349	60738.5	6945.03	646.07	71464.6	339.882	210.834	221.056
												14.2965	72432.7	177424	12162.4	96528	5527.69	1096.82	56699.7	514.966	183.507	281.359
												14.3066	67612.2	171131	10391.6	121857	5431.38	1361.23	50033.2	654.059	187.246	181.765
												14.3168	58719.5	149960	8259.33	143823	4523.9	2501.23	47380.6	813.338	167.679	133.002
												14.3264	77110.3	191653	12986.2	78122.1	6283.77	1415.33	62170.9	466.869	204.527	143.84
												14.345	101427	244448	21198.7	35898.5	8912.94	795.263	68573.3	226.3	244.469	221.214
												14.3542	96587.8	234096	19377.8	42324.6	8356.56	858.326	67828.8	262.262	236.969	206.895
												14.3635	104433	248959	22748.4	32207.3	9112.31	638.42	71709.4	200.405	244.326	252.648
												14.3728	103616	249427	22069.9	32866.8	9220.24	716.138	71941.9	209.828	249.498	195.937
												14.3821	92467.4	220665	18555	41477.3	7524.8	998.165	74076.8	262.124	218.958	210.442
												14.3914	63014.2	160700	9234.75	138025	4999.5	1714.38	46949	744.904	178.27	165.992
												14.4006	64185.2	163209	9568.88	135558	5105.12	1394.5	49082.3	718.026	180.4	166.672
												14.4099	63909.5	163786	9375.46	131290	5174.93	1492.21	53849.1	727.837	185.034	103.834
												14.4192	55965.9	144502	7638.48	169077	4370.96	1976.54	44925.4	905.469	164.671	124.108
												14.4285	49344.5	128571	6273.77	201854	3752.38	2969.71	38266.2	1085.15	148.479	125.891
												14.4377	50898.1	131056	6652.28	183717	3787.69	3099.16	40920.1	1005.96	148.486	139.07
												14.447	53441.7	136856	7174.51	167523	3990.01	3108.91	42425.2	931.666	153.453	149.111
												14.4563	52599.4	133153	7132.47	171327	3784.68	3566.34	37319.6	925.455	144.912	265.323
												14.4656	53366.4	134435	7332.87	172064	3812.22	3907.82	32479.2	906.442	143.417	437.904
												14.4748	62188.3	150073	9786.3	108653	4233.44	2748.71	50020.5	610.316	151.058	398.451
												14.4929	60222.3	148921	9057.74	133996	4323.61	1956.02	47800.6	710.783	156.57	289.199
												14.5019	63747.5	158749	9748.28	122288	4779.69	1671.3	52336.5	664.887	169.659	206.043
												14.511	66336.1	166431	10212.9	115549	5159.11	1597.73	53622.8	640.929	180.281	168.882
												14.52	65264.8	164360	9893.99	117437	5084.57	1767.89	53789.6	662.205	179.531	148.018
												14.529	64010.6	161192	9634.84	123892	4948.72	1668.61	53036.5	684.594	176.039	155.329
												14.5381	67692.7	168639	10659.3	110810	5220.64	1444.93	54461.8	607.051	180.245	196.086
												14.5471	75402.6	186584	12679.9	86985.8	6014.33	1202.17	59134.2	490.248	196.915	194.546
												14.5561	73196	182153	12004.3	92785.5	5838.59	1299.48	58762.5	525.531	194.532	169.739
												14.5652	75268.2	188093	12463.7	88379	6157.89	1152.44	61459.1	505.062	202.779	140.956
												14.5742	75983.4	191352	12474.7	87930.5	6365.98	1197.54	60957.1	510.257	209.08	120.932
												14.5832	70563	177639	11131.6	104455	5691.5	1481.56	54342.3	588.786	193.168	158.898
												14.5923	75689.6	190396	12418.4	90478.9	6307.11	1206.85	58458.9	517.282	206.999	140.768
												14.6013	87504.4	213976	16413.5	57974.9	7351.09	726.301	72054	339.038	222.209	157.094
												14.6103	91676.5	222713	17844.6	51166.9	7764.09	698.282	70625.6	300.895	227.583	191.931
												14.6193	76255.7	190141	12821.4	89082.3	6258	894.446	63019.5	492.835	204.28	148.502
												14.6284	69285.3	173898	10955.3	110687	5518.72	1135.43	57157.9	600.054	188.828	156.198
												14.6374	68774.5	173474	10744	118138	5525.7	1176.27	52215.6	628.145	188.953	181.702
												14.6464	75760.9	188624	12718.3	92599.6	6169.05	905.757	59794.9	502.662	201.372	179.793
												14.6555	94921.1	223970	19920.6	40232	7658.75	583.516	80009.6	238.599	218.315	247.103
												14.6645	118654	275213	29958.2	19382.5	10603.3	341.046	80325.3	121.444	257.047	316.802
												14.6735	123763	288175	32019.2	17523.6	11489	308.274	76353.5	110.143	269.556	329.787
												14.6826	120685	280923	30645.8	20118.1	10981.7	290.072	76032.5	121.764	262.753	365.949
												14.6916	115587	272804	27654.1	24823.9	10531	356.747	72395.8	149.246	261.456	324.183
												14.7006	96553.8	231183	19994.6	42274.3	8155.76	517.528	77329	247.899	230.765	208.501
												14.7096	90004	219574	17260	57679.9	7630.93	587.517	69561.2	324.921	226.015	197.191
												14.7187	89472.4	218223	17125.5	58126	7563.19	571.441	71025.8	327.097	224.923	187.436
												14.7277	93543.5	224311	18908.8	48765.6	7767.84	539.073	72492.5	276.233	223.799	252.495
												14.7367	102834	245036	22379.6	34247.8	8923.59	463.118	78864.7	205.918	241.998	211.799
												14.7458	98406.4	230426	21529.9	32443.5	8006.37	525.901	89828.1	200.903	222.947	196.635
												14.7548	102728	242105	22799.9	31712.2	8687	467.798	83009.9	192.89	235.161	224.391
												14.7638	101002	239634	21839.5	36194.2	8561.45	493.696	76789.3	214.406	234.509	253.632
												14.7729	96173.5	229336	20010.3	41061.7	8029.39	536.122	79245.5	243.117	227.66	207.596
												14.7828	63906.1	162637	9509.54	133100	5090.23	1297.53	53615	714.84	181.243	127.739
												14.7928	48019.7	125413	6105.17	225292	3669.96	1851.48	38208	1121.61	145.582	129.605
												14.8028	46332.5	121514	5765.15	237394	3533.19	2138.01	35177.1	1181.25	141.648	137.256
												14.8128	49397.9	129928	6245.62	214563	3872.16	2204.23	38471.4	1114.07	152.702	107.85
												14.8228	49250.3	127477	6419.58	217879	3712.27	1728.95	38010.8	1065.62	145.218	169.312
												14.8328	63199.7	158733	9587.22	134691	4851.18	1125.31	54154.2	696.794	172.767	171.33
												14.8428	51824.5	132753	6958.16	187710	3856.25	1895.99	44005.2	967.546	149.472	146.354
												14.8528	60841.3	154505	8878.35	145972	4718.32	1434.99	49724.3	766.894	171.043	156.944
												14.8628	62557.1	160263	9088.1	132482	5014.62	1555.55	55953.1	743.032	181.673	90.7397
												14.8728	42460.6	111487	5079.62	258477	3143.36	3033.4	30556	1293.7	129.655	162.004
												14.8828	39233.6	103839	4491.23	276011	2883.21	3583.23	30632	1416.43	123.214	114.708
												14.8928	53492.1	138271	7150.28	182073	4117.2	2143.78	42384.5	963.135	157.664	133.783
												14.9028	54504.1	141549	7261.87	172243	4268.24	2361.44	44908.9	949.229	163.364	101.336
												14.9128	44816.1	118722	5351.83	237695	3441.75	3724.75	32030.6	1265.76	140.462	119.66
												14.9228	39068.3	105041	4356.95	290958	2992.05	4746.52	24009.4	1493.89	126.228	146.651
												14.9328	37173.8	100263	4074.72	311795	2835.46	4546.61	22357.1	1560.79	120.935	154.371
												14.9428	38304.2	103214	4219.36	290993	2926.59	4689.72	26316.8	1525.88	125.518	105.221
												14.9528	44921.7	120087	5329.22	251912	3552.43	3299.45	29055.6	1298.27	143.461	131.836
												14.9628	59058.6	153241	8185.3	159251	4773.02	1880.69	44862.5	861.565	175.682	119.162
												14.9727	62029.2	158317	9024.17	141065	4902.58	1656.16	48296.1	760.439	176.402	149.472
												14.9826	42068.2	111587	4894.79	255664	3172.29	4277.03	29386.3	1349.78	132.04	130.88
												14.9925	37789	101483	4133.98	285324	2836.24	6157.85	25358.7	1536.46	122.454	116.229
												15.0023	36763.5	99826.7	3928.28	303346	2823.89	6600.92	22356.7	1617.22	122.088	120.135
												15.0122	35990.8	97805.4	3808.06	308344	2750.17	7352.8	21271	1648.83	119.536	127.6
												15.0221	42348.2	114483	4746.4	250639	3344.46	6726.25	27226.4	1424.57	139.651	95.6277
												15.0319	40144.2	106443	4592.18	273339	2979.3	5562.29	23536.3	1411.81	124.26	214.822
												15.0418	42723.8	108466	5419.63	259565	2911.84	3215.79	23153.3	1176.77	116.04	750.968
												15.0517	43462.5	107452	5830.24	253290	2792.4	2196.97	24432.2	1067.53	109.621	1319.17
												15.0616	45576.4	111922	6314.38	243102	2931.31	1772.03	25342.1	999.9	112.693	1559
												15.0714	45386.8	112286	6247.26	256169	2985.48	1531.27	23946.8	1023.85	114.179	1583.08
												15.0813	46137.8	114047	6409.66	251839	3047.8	1338.83	25545.4	1003.6	116.191	1422.78
												15.0912	41143.2	101066	5503.85	263698	2560.61	1450.35	30477.6	1086.35	103.785	833.601
												15.1011	44929.3	106890	6473.42	207046	2633.44	1344.06	42198	897.252	105.267	790.304
												15.1109	44116.8	104215	6413.47	217968	2529.83	1213.87	38712.4	898.684	100.736	1185.01
												15.1204	49501.4	115439	7607.95	168130	2845.23	1412.19	46447.2	752.579	109.666	1037.77
												15.1293	50201	118567	7632.94	177349	3004.07	1261.38	43760.9	778.998	114.737	974.847
												15.1382	52132.9	127057	7687.68	189934	3441.01	1172.19	39438.8	834.905	129.127	695.762
												15.1559	59759.9	151073	8734.46	161458	4551.92	1439.5	40812.3	794.492	163.62	305.095
												15.1648	52482.8	134781	7061.65	194096	3953.03	1980.6	38162.1	974.243	150.811	209.161
												15.1736	41907.5	108422	5136.5	264416	2982.71	2501.48	29704.3	1251.85	122.455	251.108
												15.1825	42026	108802	5148.21	263823	2998.47	2567.98	29385.6	1252.1	122.928	254.431
												15.1914	43447.3	111828	5420.52	248320	3080.64	2605.62	31066.1	1195.42	125.227	260.475
												15.2002	45230.3	115915	5755.91	233926	3210.88	2612.2	32062.6	1137.13	128.743	278.195
												15.2091	40309.7	104397	4864.69	276292	2840.92	2700.44	28034.4	1299.37	117.935	266.913
												15.218	41591.4	106464	5147.9	254379	2862.68	2609.04	32239.7	1221.02	118.622	249.536
												15.2269	40921.6	103160	5168.32	256719	2695.04	2457.42	31034.6	1185.42	111.477	388.817
												15.2357	42886.1	109967	5381.53	255415	3006.4	2238.69	31034.2	1193.53	122.333	288.883
												15.2446	41080.2	106039	5027.47	270401	2890.86	2338.39	29930.5	1262.85	119.447	255
												15.2535	39629.7	101930	4805.34	274543	2726.31	2478.03	30529.3	1288.62	114.467	244.767
												15.2623	40979.2	105829	5006.7	271102	2884.93	2348.4	29925	1267.19	119.334	251.186
												15.2801	36644.7	94205.1	4347.3	304050	2464.2	2589.71	26100.1	1368.96	105.007	333.658
												15.2889	38936.2	100885	4672.99	293940	2729.89	2242.43	27318.9	1330.92	114.06	279.263
												15.2978	36580.7	94149.3	4321.79	300851	2462.51	2592.69	27629.7	1375.45	105.616	276.964
												15.3067	37286.6	95533.2	4470.75	295168	2497.01	2399.03	28251.9	1336.7	106.299	302.89
												15.3155	36784.6	94106.5	4413.25	300912	2447.8	2185.89	28405.1	1341.35	104.531	307.845
												15.3244	45257.7	114757	5922.18	243308	3146.64	1796.33	31529.2	1098.19	124.71	404.596
												15.3333	40488	101684	5164.34	266166	2643.98	1877.03	31509.3	1177.33	109.259	423.642
												15.3421	41012.4	104808	5142.54	281049	2827.3	1858.52	27347.3	1224.8	115.081	431.224
												15.351	41980.4	105808	5410.17	262949	2806.02	1720.21	30908.4	1152.44	114.031	443.706
												15.3599	43582.7	109693	5721.74	257735	2944.73	1571.54	30103.4	1110.67	117.408	531.529
												15.3776	46526.2	118021	6182.46	243615	3281.22	1474.81	31260.5	1069.51	128.03	446.086
												15.3865	47091.9	119564	6264.8	239251	3338.97	1576.97	30967.9	1061.78	129.756	449.548
												15.3954	50079.2	125738	6933.09	216463	3520.87	1446.04	33401.1	964.529	133.859	517.956
												15.4042	46698.8	117965	6255.34	243193	3262.43	1510.92	29902.4	1055.08	126.541	555.318
												15.4131	49167.6	124283	6711.18	230397	3503.85	1408.49	30779.1	1005.32	133.342	550.049
												15.422	50562.2	126844	7038.5	214388	3560.25	1411.85	33428.3	952.706	134.751	536.161
												15.4308	46828.2	118541	6263.99	244385	3294.54	1477.91	29776.8	1058.54	127.596	540.46
												15.4397	57904	144171	8599.82	171626	4199.96	1208.79	39163.8	792.448	151.525	490.117
												15.4486	52324.1	132991	7252.92	214901	3867.35	1301.4	32655.5	957.11	144.24	453.707
												15.4574	65592.7	162231	10387.2	136715	4916.21	1048.96	43621.3	652.909	168.495	480.896
												15.4663	71900.3	176023	12086.2	109208	5466.01	908.28	49753.6	539.96	180.135	448.054
												15.4841	69067.3	172130	11046.1	125793	5392.56	1075.01	44133.5	619.862	180.995	403.714
												15.4929	75427.5	189510	12305.9	102188	6225.05	1527.36	42582.7	549.812	200.96	353.809
												15.5018	71241	181315	11163.6	122939	5948.18	1136.22	44368.4	632.142	198.064	250.253
												15.5107	64746	164009	9759.35	138458	5119.57	1351.35	45083.7	710.708	178.782	237.057
												15.5195	63592.3	161525	9463.48	144496	5024.68	1421.72	43421.9	738.081	176.681	242.485
												15.5284	63596.3	160795	9519.31	140538	4961.67	1493.22	44266.9	724.257	174.634	250.322
												15.5373	60329.1	154217	8659.85	155729	4735.9	1698.73	42400	807.13	170.975	205.601
												15.5461	60380.6	154480	8646	152470	4748.25	1776.53	43798.3	804.318	171.952	181.377
												15.555	57941	148566	8135.24	169333	4511.92	1836.77	39245	863.732	165.125	226.783
												15.5639	57167.2	147798	7877.33	176256	4524.71	1921.97	38028.6	902.944	166.595	201.267
												15.5727	58813.7	150252	8376.05	168411	4568.68	1687.6	38316.6	841.54	165.403	273.74
												15.5816	64053.4	163841	9465.45	147123	5171.94	1387.99	42380.2	750.398	181.185	225.55
												15.5905	63485.7	162913	9272.12	147783	5142.56	1574.05	41749.5	766.831	181.181	210.513
												15.5993	69438.1	175605	10827.7	119811	5631.8	1298.28	47541.9	633.342	190.828	222.288
												15.6082	80209.2	197929	14058.8	84777.9	6554.48	841.655	55334.5	450.034	205.979	287.389
												15.688	71824	181699	11381.2	111869	5920.76	1225.71	49171.4	598.81	197.678	206.328
												15.6969	69031.8	176505	10539.2	124023	5742.26	1376.79	46516.4	663.903	195.565	182.377
												15.7058	69261.8	176055	10685	120070	5681.65	1389.71	47599.4	645.012	193.222	193.737
												15.7146	74993.2	189955	12111.6	103413	6325.33	1179.25	49430.7	560.392	206.734	203.364
												15.7235	74495.3	188790	11991.9	106132	6274.51	1142.66	49015.2	569.421	205.594	207.773
												15.7324	68878.8	175097	10590.8	120064	5636.44	1429.62	48081.4	648.859	192.413	185.477
												15.7413	69112.3	175098	10707.2	117671	5616.94	1382.14	49367.5	635.913	191.523	186.771
												15.7501	72303.2	183374	11436.3	110581	6014.06	1276.84	48773.1	597.488	200.272	198.195
												15.759	75583.7	190108	12415.6	100199	6290.19	1074.05	51194.3	538.076	204.597	220.054
												15.7679	78423.6	194783	13398.2	86649.8	6435.46	1029.82	55338.9	474.735	205.508	233.231
												15.7767	75590.7	190741	12326.8	101979	6334.78	1184.2	48242.8	548.496	205.661	238.442
												15.7856	73617.4	185982	11799.2	108422	6104.35	1360.4	45114.3	579.879	200.322	270.271
												15.7945	73907.3	187380	11787.1	105614	6193.33	1432.92	46567	578.257	203.628	223.945
												15.8033	73401.9	185831	11688.1	105271	6108.05	1474.46	47281.7	579.561	201.713	218.25
												15.8122	78395.3	200004	12749.3	93738.6	6864.35	1361.71	48411.2	530.299	219.827	179.234
												15.8211	79322	199795	13276	90629.4	6765.58	1200.37	48806.7	499.108	214.339	241.349
												15.8299	76696.5	193967	12553	101413	6507.48	1167.65	46706.2	543.046	209.355	252.595
												15.8388	73222.5	185526	11636.8	110089	6098.44	1451.25	44091.4	591.754	200.671	265.747
												15.8477	71698.8	184237	11006.6	116739	6127.25	1654.34	43004.4	641.057	204.505	200.025
												15.8565	65571.7	171236	9389.81	144125	5613.56	2143.99	37075.8	782.157	194.843	190.304
												15.8654	67333.8	173980	9933.59	136223	5673.5	1980.19	37365	728.951	193.861	245.561
												15.8743	70669.2	180550	10872.8	117072	5912.25	1663.13	43985	640.763	198.747	210.466
												15.8832	65109.1	167463	9525.1	140871	5343.74	2050.37	38042.6	750.756	185.602	249.321
												15.892	70115.7	180028	10687.7	127090	5927.01	1561.45	39998.5	670.97	198.704	253.623
												15.9009	78283.3	194769	13295.9	89538.4	6435.92	1122.41	51192.6	486.184	205.026	278.033
												15.9114	106613	256258	23360.1	35601.8	9627.12	394.24	70317.4	205.664	254.505	263.291
												15.922	100849	244090	21016.4	42777.5	8943.09	468.613	68633.8	244.744	245.85	245.391
												15.9325	87456.1	217266	15901.5	72474.6	7596.84	730.132	54978.7	392.412	227.778	264.303
												15.9431	87257.1	217956	15704.3	70474.9	7682.43	770.966	58145.3	394.076	231.86	193.289
												15.9536	95238.1	234889	18445.2	50790.5	8536.66	704.615	64484.8	300.299	244.792	181.533
												15.9642	93125.9	229810	17747.2	55789.8	8239.89	742.625	61025	322.508	239.053	213.38
												15.9747	79062.5	198566	13302.6	89568.1	6693.25	1087.91	51934.7	492.443	212.838	218.979
												15.9851	70601.6	180385	10905.7	119035	5919.48	1351.42	46619.6	639.988	199.365	187.53
												15.9953	66893	170737	10081.4	131075	5460.44	1500.35	44594	694.626	188.322	205.729
												16.0056	75726.5	191315	12357.5	98846.4	6380.23	1100.96	52649.4	540.504	208.034	181.914
												16.0159	88640.3	217778	16557.7	63499.9	7554.12	723.643	61356.6	354.826	225.297	237.685
												16.0261	99400.7	239951	20626.9	41642.2	8695.63	514.639	72355.7	244.221	241.66	213.51
												16.0364	102034	243454	21976.2	39687.4	8799.99	424.959	70652.5	224.264	239.08	310.828
												16.0467	101044	242380	21413.9	39648.5	8783	485.28	71743	230.488	240.866	253.275
												16.056	86577.3	211309	16122.8	68819.1	7157.86	724.788	58032.9	370.676	215.281	329.268
												16.0635	65286.5	166497	9763.29	141410	5268.35	1443.78	41797.8	724.795	182.725	252.15
												16.071	68186.9	174001	10378.7	127100	5611.16	1424.89	45204	674.424	191.815	203.986
												16.0786	72505.6	183113	11552.8	110093	5969.8	1315.49	47107.9	589.692	197.885	239.789
												16.0861	70466.5	179097	10922.1	116943	5810.43	1626.73	43896.4	633.316	195.227	238.737
												16.0937	72782.9	184391	11523.1	105556	6043.02	1522.83	48146.3	586.129	200.779	200.835
												16.1012	71277.9	180542	11192.6	113263	5862.92	1448	46347.3	611.647	196.166	227.606
												16.1087	70657.7	179226	11000.8	111414	5805.35	1602.69	47838.8	616.936	195.839	193.737
												16.1163	73772.1	187011	11741.6	101484	6172.55	1531.57	49281.8	571.355	204.068	185.252
												16.1238	73791.1	185290	11957.9	102509	6032.86	1341.78	48806.8	557.341	198.428	244.769
												16.1314	74153	187988	11878.1	99747.8	6235.48	1278	53743.3	560.449	206.342	150.293
												16.1389	84383.9	208536	15146.8	71749.1	7102.19	872.514	59124.2	401.46	218.132	223.563
												16.1468	91109.8	222985	17396.2	55594.1	7811.21	755.629	64609.5	322.331	229.622	213.332
												16.1562	86253.1	212455	15765.7	66696.6	7285.81	838.273	60796.9	376.942	221.06	221.969
												16.1657	75663.9	188392	12626.1	91643.4	6139.47	1143.97	55889.8	506.579	200.246	205.869
												16.1751	76695.6	194287	12530.9	93399.2	6545.9	1149.02	55248.3	526.412	212.967	146.4
												16.1845	75156.9	188930	12280.1	99118.2	6218.29	1262.67	49888.1	541.339	202.855	229.049
												16.194	88169.5	216915	16345.3	60429.8	7516.78	867.485	63428.3	352.221	225.677	195.466
												16.2034	82574.2	205099	14520.2	77332.5	6958.98	908.259	57452.4	429.306	216.375	216.601
												16.2129	81029.7	202138	13992.2	79123.6	6838.88	995.519	58610.3	447.272	215.556	179.677
												16.2223	86782.2	212454	16091.8	64218.5	7245.76	804.101	62261.2	362.244	218.844	237.953
												16.2318	74039.2	184844	12176.1	90542.9	5995.66	1181.32	61820.9	516.702	199.185	139.683
												16.2412	67903	170261	10533.2	106675	5315.55	1917.1	53181.6	613.274	183.941	168.268
												16.2507	70620.2	177199	11151	99398.9	5636.99	1850.03	53462.5	577.389	191.347	167.796
												16.2601	65964.7	166041	10021	115351	5145.1	2070.12	50093.8	655.707	180.2	178.269
												16.2696	61207.8	155322	8889.35	141721	4726.3	2110.3	43915	766.017	170.217	208.23
												16.279	54875	140689	7433.93	166353	4151.41	3211.91	38901.6	914.616	156.868	190.552
												16.2878	58355.1	149304	8091.56	141778	4484.59	3796.22	41928.2	829.667	166.214	162.027
												16.2963	71609.2	179780	11327.2	89669.8	5752.64	2286.19	56177.3	552.094	194.985	133.775
												16.3049	80279.7	197101	14085.7	69703.2	6467.38	1359.23	61699.9	415.356	205.013	195.065
												16.3135	68449	171916	10600.6	106989	5390.9	2161.64	49199.2	615.706	185.209	198.968
												16.3221	71896.5	178815	11620.5	93987.3	5657.78	1786.65	53914.8	543.176	189.848	201.842
												16.3306	64485.5	164011	9516.23	124133	5109.62	2342.87	46758.5	707.947	180.845	165.838
												16.3392	76156.2	189139	12717.5	82023.6	6142.1	1609.75	57010.5	484.375	200.451	183.728
												16.3478	87272.2	215508	15953.7	61092.7	7463.44	987.243	62903.8	362.667	225.814	177.796
												16.3563	77836.4	193685	13187.7	88617.1	6388.73	1105.27	53722.2	486.194	204.722	239.756
												16.3649	82681.2	206452	14348.1	73114.1	7051.64	1211.49	57279.3	428.942	220.028	177.414
												16.3735	80835.4	199956	14079.6	72884.6	6660.57	1237.23	59961.6	427.381	210.356	187.274
												16.3821	67588.3	170485	10357.9	113748	5357.96	1964.93	48594.5	641.538	185.075	192.176
												16.3906	66363.6	169157	9893.18	120934	5354.34	2258.15	45521	687.771	186.61	176.32
												16.3992	84394.9	208202	15133.1	64723.9	7067.39	1139.24	62200.1	385.633	218.015	180.779
												16.4078	87805.4	216922	16093.9	62580.4	7536.49	939.951	60432.5	364.546	226.719	203.171
												16.4163	81269.7	200892	14286.9	73616.4	6721.83	965.831	63318.4	421.602	211.758	173.545
												16.4249	84693.7	209811	15145.7	64862.9	7190.77	1043.72	64246.5	386.886	221.873	153.268
												16.4335	76006.5	190132	12573.8	86940.7	6247.04	1369.17	57258.6	502.825	204.261	163.112
												16.4421	69476.2	174712	10864.9	104375	5540.91	1728.87	53871.1	598.418	189.686	158.397
												16.4506	63810.8	162432	9398.41	127481	5056.65	1944.66	49983.5	717.056	180.311	139.68
												16.4592	62109.4	158993	8910.57	129120	4924.32	2500.68	49585.4	753.817	178.606	115.268
												16.4678	68979.8	172685	10803.6	103128	5414.3	1929.97	52957.2	595.171	185.79	177.498
												16.4798	81472.2	204422	13916.9	75019.5	6985.36	1254.96	58645.1	445.296	220.419	146.606
												16.4979	89035.7	218391	16756.4	60816.1	7589.11	679.334	65302.8	343.601	226.209	205.659
												16.5159	76575.9	191015	12907.8	90686.9	6304.81	838.225	61811.9	494.048	205.006	159.736
												16.534	78492	194355	13572	84256.8	6421.25	789.235	63173.5	459.004	205.769	179.466
												16.552	85865.1	210652	15853.6	68338.8	7186.52	640.214	64820.5	374.08	218.513	216.097
												16.5701	94623.8	228417	18992	46006.6	8035.09	644.768	72000.4	272.044	230.598	208.355
												16.5881	100126	240824	21094.3	37551.4	8756.49	488.917	79868	226.876	242.585	167.348
												16.6049	96481.5	231200	19942.4	43919.6	8156.76	490.515	75554.6	252.885	230.714	225.891
												16.6147	83832.1	204219	15444.3	66677.9	6812.31	716.571	68752.1	373.009	210.281	201.69
												16.6246	84004.6	203432	15624.9	66881.7	6723.41	727.062	65997.9	368.218	206.518	260.148
												16.6344	83204	204673	14990.4	71091.8	6891.46	776.738	64918.2	397.71	213.828	191.182
												16.6443	64326.2	163085	9690.9	141873	5094.6	1152.55	47001.9	717.319	178.618	213.72
												16.6541	66052.5	167934	9980.85	130021	5316.47	1346.62	48933.3	690.022	185.229	173.865
												16.664	62037.9	158994	9002.53	148771	4966.63	1436.9	46380.2	777.706	177.958	159.829
												16.6739	55354.9	142362	7599.47	181383	4271.52	1810.81	39696.8	919.146	159.668	196.318
												16.6837	51837.6	134213	6794.42	187966	3950.08	2689.09	39641.2	1007.21	153.092	142.606
												16.6936	56367.2	146642	7565.98	167803	4482.63	2876.2	39218.5	928.4	167.86	142.104
												16.7034	57688.1	148747	7964.02	161830	4534.12	2284.83	41789.5	874.588	167.937	156.749
												16.7133	59207.2	152666	8261.72	155663	4700.98	2269.54	41872.1	846.429	172.136	159.933
												16.7231	63173.3	161855	9169.55	133075	5069.5	1962.13	48664.1	746.362	181.614	129.828
												16.733	59866.4	153186	8502.36	148116	4682.51	2101.29	45002	807.686	171.028	158.29
												16.7426	53185.2	138979	6920.29	185855	4184.79	3199.77	36090.7	1013.86	160.011	149.546
												16.751	53232.3	138723	6922.26	176500	4147.28	3785.51	37681.8	998.24	159.434	134.562
												16.7594	52945.3	139155	6750.51	174401	4199.09	4449.42	38484.4	1026.6	162.85	99.6719
												16.7678	51644.8	135860	6506.95	184856	4067.24	4955.06	34319.8	1068.38	158.197	128.489
												16.7761	53379.9	140162	6820.38	169705	4229.7	4987.32	37779.8	1013.43	163.466	105.11
												16.7845	55272.6	142316	7392.51	153220	4219.25	4550.7	40427.4	907.458	160.442	141.746
												16.7929	54850.2	141773	7278.94	158076	4219.81	4317.56	40308.3	929.268	161.009	132.202
												16.8013	60644.5	154966	8585.86	136581	4723.49	3398.09	41383.2	789.085	171.541	184.546
												16.8097	60182.1	152992	8589.79	135748	4619.3	2863.46	45416.7	777.199	168.889	163.969
												16.818	68989.8	171854	10927.5	97138.2	5360.64	1706.75	60575.5	569.93	184.965	135.925
												16.8348	72240.8	179308	11842.9	95516.5	5695.1	1203.73	59685.2	532.516	190.886	174.588
												16.8432	69629.8	174224	11073.2	105320	5511.58	1219.29	59037.7	583.03	188.515	148.545
												16.8516	72352.4	179538	11889.2	97334	5706.42	1128.9	58798.2	534.314	190.786	187.705
												16.8599	72833.2	182641	11815.3	101114	5920.34	1079.47	57148.6	552.901	197.443	165.366
												16.8683	71620.1	179541	11515	103628	5768.38	1159.81	56451.9	567.674	193.997	168.123
												16.8767	71228.3	177068	11638.3	110550	5613.62	901.743	54274.9	567.35	187.766	245.144
												16.8851	70244.8	175796	11268.5	113765	5594.81	962.171	54348	591.587	188.953	205.271
												16.8935	59746.1	151325	8722.8	156615	4578.5	1250.29	47230.3	786.597	166.203	197.852
												16.9019	68914.4	170762	11102.1	106066	5302.07	1106.6	60100.5	573.175	181.737	178.389
												16.9102	74589.4	184991	12473.7	92923.8	5963.15	1018.49	59202.6	507.972	196.13	193.801
												16.9185	58755.4	150063	8325.61	153991	4546.36	1885.25	45679.9	822.737	167.284	159.917
												16.9262	60646.7	155482	8628.04	142085	4790.64	2121.74	47456.5	792.466	174.773	130.695
												16.9339	61138.5	157079	8677.92	139615	4865.76	2360.95	46249.2	790.205	176.896	131.44
												16.9416	60979.6	157766	8553.18	143216	4937.01	2361.24	45646.6	812.769	179.858	116.82
												16.9493	60892	155305	8729.48	137076	4747.91	2322.31	47469.5	772.896	172.881	143.266
												16.957	61627.3	158644	8747.26	139181	4944.43	2408.88	45268	788.844	178.961	134.221
												16.9647	64568.3	163182	9697.89	128605	5053.89	1712.78	47855.8	696.52	177.989	195.061
												16.9724	77229.3	190515	13253.1	84979.5	6190.34	1006.25	59431.6	468.393	199.657	217.793
												16.9801	71678.1	179316	11553.6	105119	5739.09	1210.87	53365.8	569.012	192.217	206.317
												16.9878	73487.5	183974	11982.1	97004.6	5966.79	1177.23	57146.7	539.316	198.2	167.613
												16.9955	77759	192350	13342.1	84451.1	6300.56	967.715	60119.5	466.64	202.708	200.529
												17.0032	75484.1	188133	12597.2	92033	6144.95	1014.89	58914.5	506.817	201.107	177.439
												17.0109	79457.7	194829	14024.5	78209.5	6373.55	848.18	63597.5	430.687	202.525	212.858
												17.0186	80802.1	199622	14215	80702.5	6657.12	799.937	59856.6	437.512	209.303	223
												17.0263	80941.5	199003	14372.4	75993.5	6599.58	810.814	63850.2	420.295	207.755	201.256
												17.034	75539.1	186638	12812.5	92956.8	6019.66	915.436	57848.1	495.901	195.971	234.626
												17.0417	70773.7	176690	11422.1	106616	5618.82	1024.52	57675.4	570.888	189.827	177.94
												17.0494	72031.4	178994	11806.6	102677	5693.66	1025.52	56722.4	548.034	190.219	208.96
												17.0724	76884.5	189459	13220.4	86727.7	6140.84	898.037	60721	470.597	198.466	215.997
												17.0801	80163.2	196826	14191.8	76634.7	6483.53	826.429	64518.6	424.343	205.237	199.208
												17.0878	91149.8	221762	17650	54270.9	7720.67	647.708	68877.6	311.428	226.843	207.756
												17.0955	89094.8	216686	17047.7	59396.2	7445.32	616.047	67519.8	331.13	221.399	229.453
												17.1032	82713.5	203106	14928.6	72853.1	6806.63	705.297	65774.8	400.686	211.718	196.776
												17.1109	72890.9	181896	11984.8	99487.4	5872.51	864.466	62510.8	536.496	196.052	149.292
												17.1186	77470.3	193390	13100.1	92102.8	6416.42	863.659	57137.3	494.443	206.526	199.326
												17.1263	89370.6	218267	17054.3	56656	7579.73	603.265	72849.9	325.069	226.001	164.562
												17.134	90969.7	220037	17850.6	50376.5	7618.1	592.199	77232.7	294.606	224.534	166.858
												17.1417	85944.8	210008	15980.6	64585.3	7129.92	671.424	67931	361.144	216.99	199.526
												17.1494	74179.2	183762	12423.6	91633.6	5908.44	939.455	63468.8	503.57	195.439	163.825
												17.1571	67338.7	169134	10505	118424	5309.34	1107.19	56398.8	630.964	184	158.797
												17.1648	70886	175157	11672.9	100240	5496.96	917.338	63831.1	538.805	185.919	168.754
												17.1802	94524.8	227296	19196.6	46554.7	7971.39	498.229	76579.8	267.62	228.75	202.318
												17.1879	76013.6	187793	12974.9	85309.6	6092.49	849.065	67096.3	472.645	199.233	151.607
												17.1965	65843.5	165123	10195.9	121228	5122.98	1103	58025.2	645.389	179.709	148.83
												17.2058	93104.4	222439	18933.9	45907.6	7663.77	538.841	78597.9	266.299	221.804	209.423
												17.2151	96833	232177	20060.6	43505.3	8221.23	472.064	76472.8	250.587	232.091	216.558
												17.2244	94942.1	227308	19490.4	44346.3	7948.05	497.665	78776.7	257.274	227.342	201.575
												17.2338	92804	222153	18810.8	44685.4	7678.92	542.083	82548.5	264.299	223.187	170.24
												17.2431	92484.6	222360	18521	46960.8	7703.61	575.778	78379.5	275.895	224.42	180.924
												17.2524	94636.1	227259	19221.7	46662.2	7943.12	543.405	73509.8	268.266	227.469	231.281
												17.2617	94397.2	224324	19557.5	43168.1	7735.3	510.024	80399.2	250.941	221.664	219.945
												17.271	96688.4	229270	20421.7	37873.8	8005.12	532.696	83879.7	228.593	226.122	192.64
												17.2803	97101.8	230643	20545	36856.2	8108.23	514.477	86526.9	224.707	228.678	168.385
												17.2896	93206.6	223202	18932	42065.5	7747.83	586.491	85185.1	256.246	224.928	147.054
												17.299	92915.6	222221	18869.6	42865.7	7680.68	581.8	84140.9	258.707	223.226	158.449
												17.3083	91653.2	220304	18289.5	47201.8	7600.83	568.608	80763	278.255	222.831	166.189
												17.3176	92363.1	220769	18669.5	46281.1	7577.19	567.469	78936.6	270.268	220.51	201.678
												17.3269	92444.6	223222	18347.9	51285.9	7762.18	544.661	72614.4	291.057	225.791	216.787
												17.3362	91292.8	219724	18076.5	51060.2	7552.62	581.954	74027.8	292.342	221.387	214.719
												17.3455	91066.4	219182	17997.2	52565.6	7518.13	573.155	72315.5	297.175	220.477	233.437
												17.3548	89331.7	215063	17454.3	56749.9	7299.7	558.131	70912.6	313.775	216.314	251.95
												17.3641	69779	172004	11478	99234.6	5350.76	854.359	69587.4	537.508	183.037	138.039
												17.3735	55196.4	138912	7842.21	162081	4024.38	1473.47	51928.1	836.605	152.527	153.04
												17.3837	53820.7	137984	7383.03	187436	4089.21	1394.51	44435.7	930.841	155.307	157.306
												17.3986	73297.1	183268	12060.9	99851.1	5953.81	815.966	62739.2	535.964	198.229	144.181
												17.4135	82905.2	201178	15334.3	63352.5	6657.35	683.772	76983.6	362.431	207.493	154.671
												17.4283	80020.2	194959	14394.1	73709.5	6359.71	712.215	70460.9	406.393	201.639	186.85
												17.4432	78705	195288	13610.2	82085	6492.78	742.912	67234.4	453.189	208.472	143.659
												17.4581	72776.7	182663	11863.5	106483	5947.83	799.733	58808.6	558.657	198.112	162.4
												17.473	64062.2	160355	9885.55	133720	4918.06	872.974	57066.2	674.206	173.888	171.044
												17.4879	80793.5	200538	14178.8	74415.6	6769.3	716.399	72020.4	422.989	215.004	115.974
												17.5177	68902.1	171275	11112.2	115056	5359.91	831.486	58598	589.555	182.935	195.602
												17.5239	71110.5	177252	11536.9	102888	5638.2	1009.5	60403.3	557.706	190.467	160.814
												17.5274	49457.2	129498	6330.85	216614	3843.88	1805.47	39771.6	1094.55	151.22	114.059
												17.5308	50464.4	132476	6475.1	209630	3973.76	1845.3	40938.9	1078.28	155.594	101.116
												17.5343	48452.3	127069	6091.67	213745	3736.55	2395.1	39496.4	1124.54	148.996	102.258
[truncated: 6,771 more rows]

## Sheet: n=22 (AvaaXelerate)
			Calibration samples (n=22; AvaaXeleratte selected), derived by WD-XRF on glass beads												Calibrated XRF-CS values for ODP 967 using 22 calibration samples
[truncated: 8,498 more rows]

[truncated: 5 more sheets: n=53 (regular), n=53 (AvaaXelerate), n=106 (regular), n=1060 (all), Intensities]
