# Supplementary material for: Accurately calibrated X-ray fluorescence core scanning (XRF-CS) record of Ti ∕ Al reveals Early Pleistocene aridity and humidity variability over North Africa and its close relationship to low-latitude insolation
Source: Copernicus journal article supplement (doi:10.5194/cp-18-2509-2022), 2022-11-22
Supplement: Supplementary file 1 [file Supplementary Material_Hennekam et al._Calibration_CP_v4.docx]

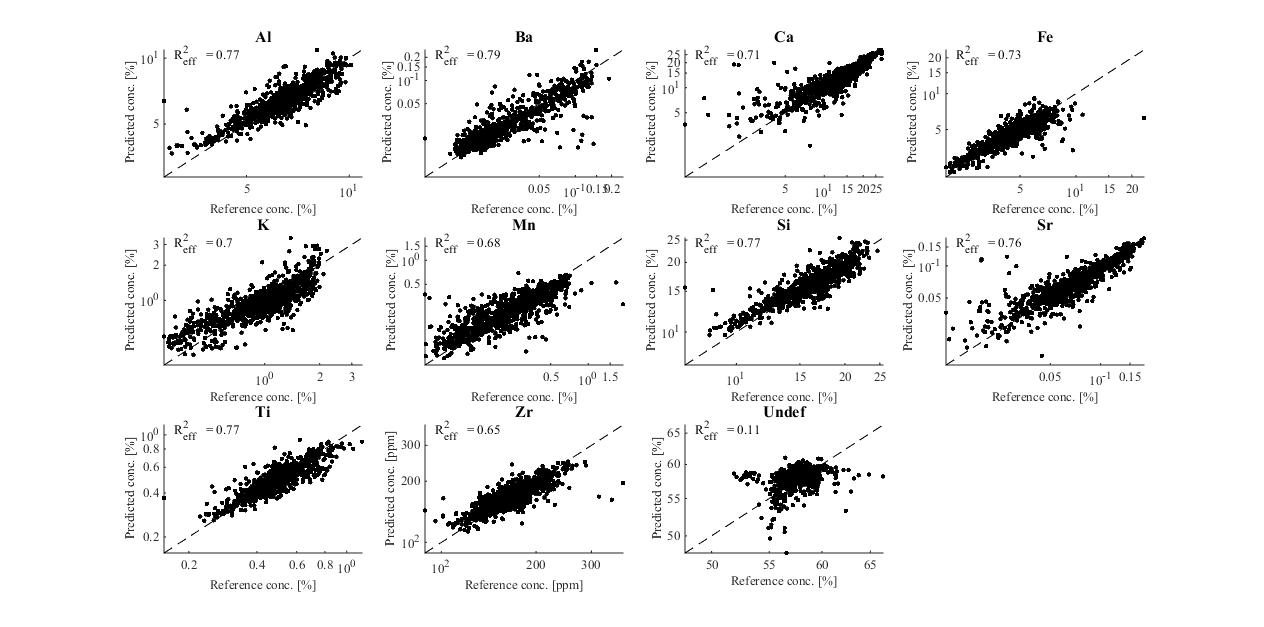


**Figure S1.** Comparison of glass-bead WD-XRF calibration data (Konijnendijk et al., 2014; 2015) versus predicted (multivariate log-ratio calibrated XRF-core-scanning) concentrations using 1060 calibration samples. Generated using the AvaaXelerate software (Bloemsma, 2015).


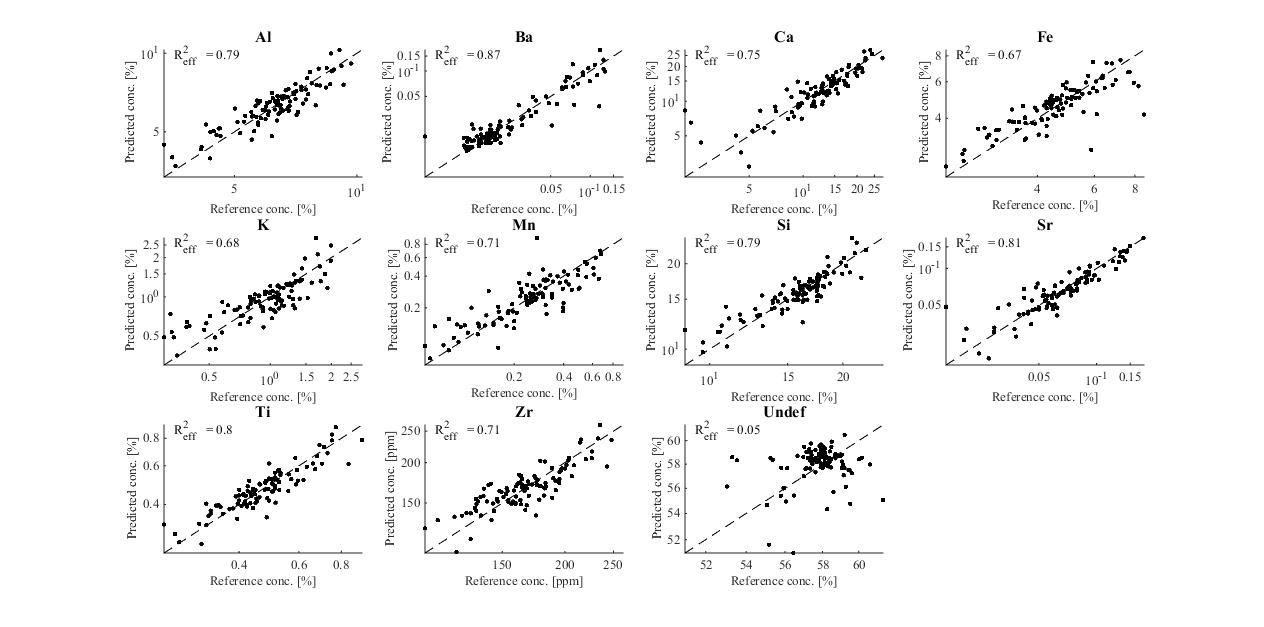


**Figure S2.** Comparison of glass-bead WD-XRF calibration data (Konijnendijk et al., 2014; 2015) versus predicted (multivariate log-ratio calibrated XRF-core-scanning) concentrations using 10% of the calibration samples. Generated using the AvaaXelerate software (Bloemsma, 2015).


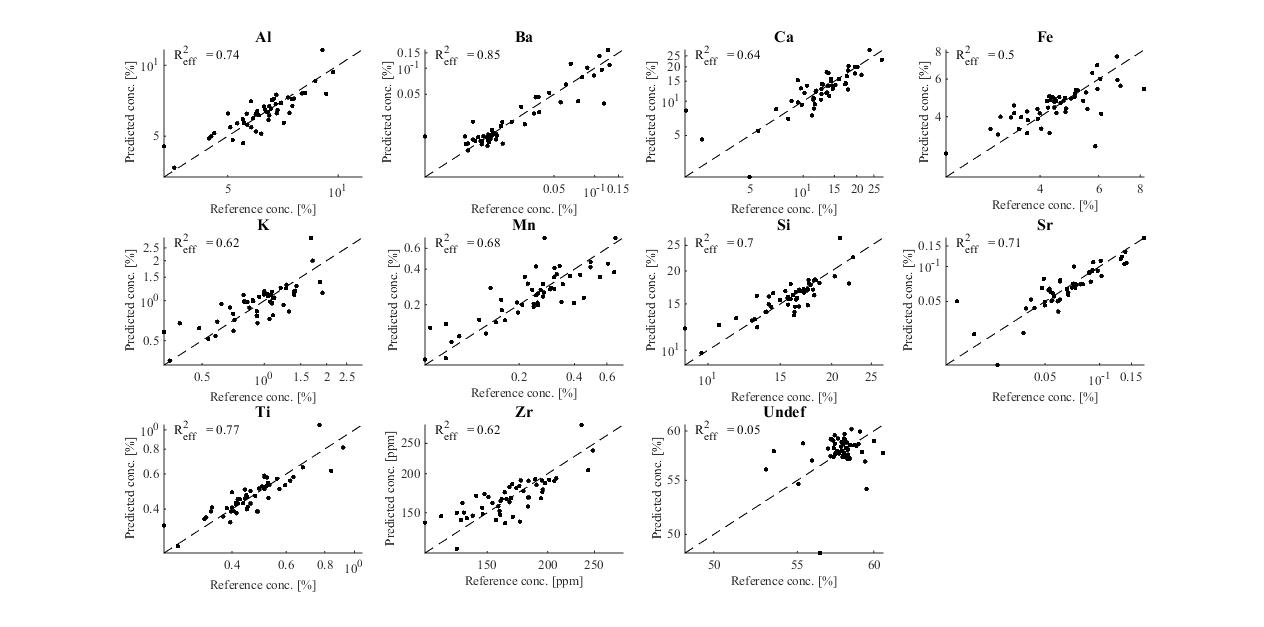


**Figure S3.** Comparison of glass-bead WD-XRF calibration data (Konijnendijk et al., 2014; 2015) versus predicted (multivariate log-ratio calibrated XRF-core-scanning) concentrations using 5% of the calibration samples. Generated using the AvaaXelerate software (Bloemsma, 2015).


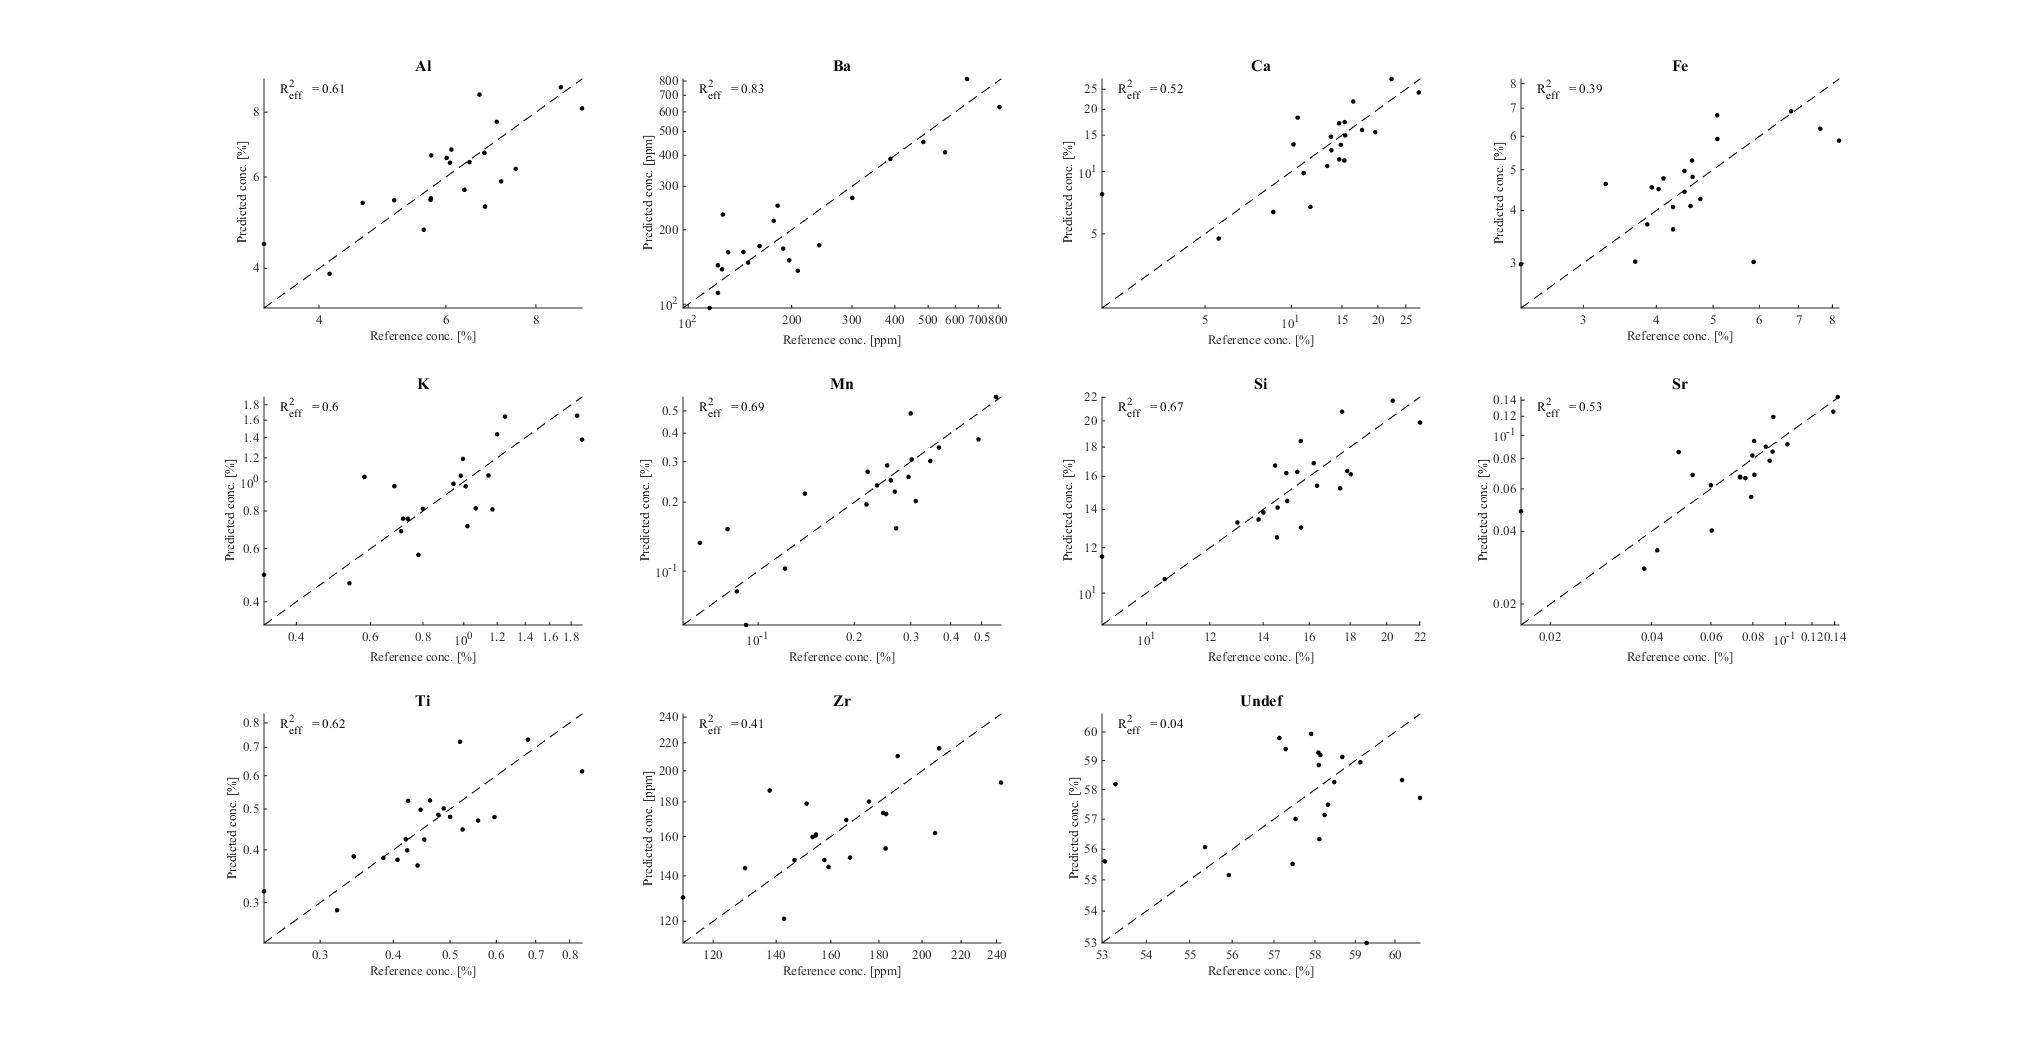


**Figure S4.** Comparison of glass-bead WD-XRF calibration data (Konijnendijk et al., 2014; 2015) versus predicted (multivariate log-ratio calibrated XRF-core-scanning) concentrations using 2% of the calibration samples. Generated using the AvaaXelerate software (Bloemsma, 2015).


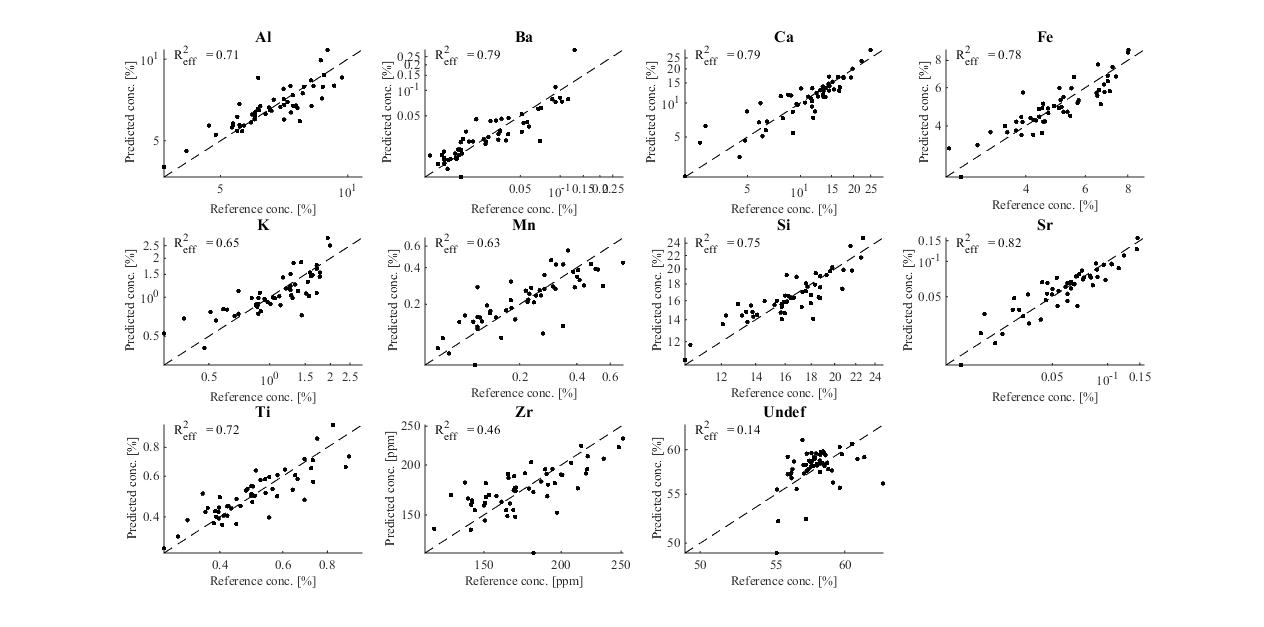


**Figure S5.** Comparison of glass-bead WD-XRF calibration data (Konijnendijk et al., 2014; 2015) versus predicted (multivariate log-ratio calibrated XRF-core-scanning) concentrations using the 53 samples selected by AvaaXelerate. Generated using the AvaaXelerate software (Bloemsma, 2015).


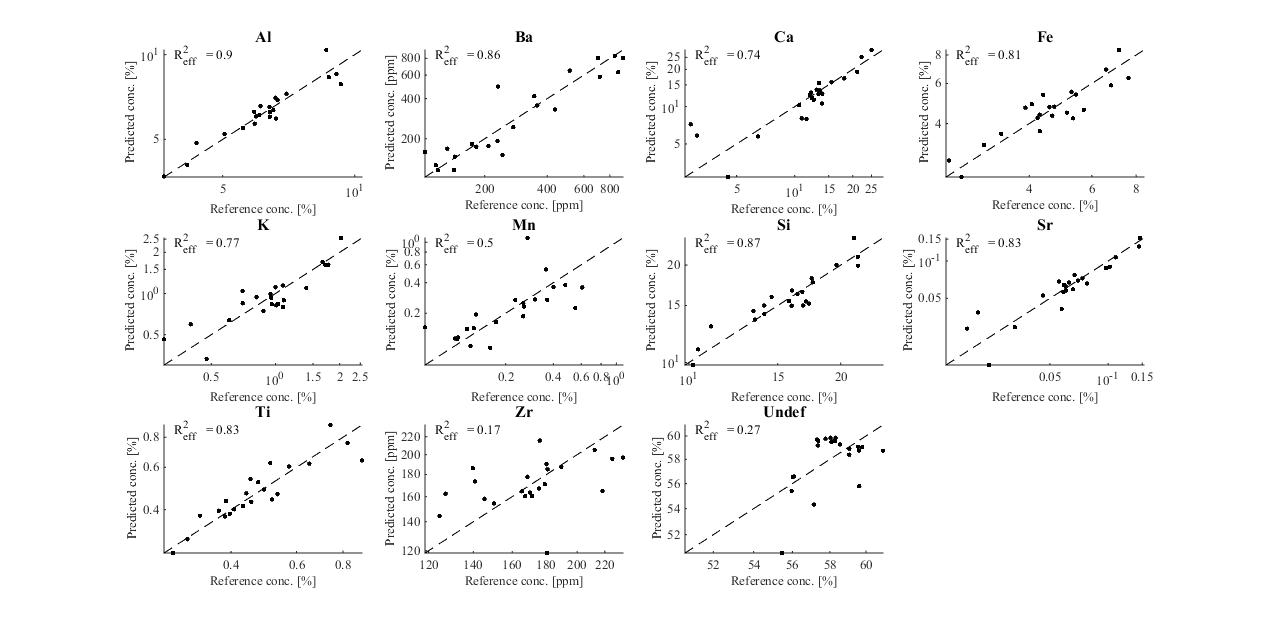


**Figure S6.** Comparison of glass-bead WD-XRF calibration data (Konijnendijk et al., 2014; 2015) versus predicted (multivariate log-ratio calibrated XRF-core-scanning) concentrations using the 22 samples selected by AvaaXelerate. Generated using the AvaaXelerate software (Bloemsma, 2015).

**References**

Bloemsma, M. R.: Development of a Modelling Framework for Core Data Integration using XRF Scanning, Delft University of Technology, 229 pp., 2015.

Konijnendijk, T., Ziegler, M., and Lourens, L. J.: On the timing and forcing mechanisms of late Pleistocene glacial terminations: insights from a new high-resolution benthic stable oxygen isotope record of the eastern Mediterranean, Quaternary Science Reviews, 129, 308-320, 2015.

Konijnendijk, T. Y. M., Ziegler, M., and Lourens, L. J.: Chronological constraints on Pleistocene sapropel depositions from high-resolution geochemical records of ODP Sites 967 and 968, Newsletters on Stratigraphy, 47, 263-282, 2014.
